# Supplementary material for: Solvation energies of the proton in methanol revisited and temperature effects
Source: Royal Society of Chemistry journal article supplement (doi:10.1039/c8cp05823g), 2018-01-01
Supplement: c8cp05823g1.pdf [file c8cp05823g1.pdf]

Optimized Cartesian coordinates of the neutral methanol clusters in the gas phase

Cartesian coordinates of the methanol dimer

Cartesian coordinates of : L2

-----  
Atomic number (AN) and Cartesian coordinates

| AN | X         | Y         | Z         |
|----|-----------|-----------|-----------|
| 6  | 1.812250  | -0.352486 | 0.425161  |
| 1  | 1.047286  | -1.027091 | 0.834778  |
| 1  | 2.160524  | 0.304053  | 1.232942  |
| 1  | 2.656553  | -0.953440 | 0.080979  |
| 8  | 1.334205  | 0.377511  | -0.683231 |
| 1  | 0.537863  | 0.849693  | -0.401559 |
| 6  | -1.745308 | -0.577528 | -0.222720 |
| 1  | -2.575534 | -0.379934 | -0.908872 |
| 1  | -2.066532 | -1.287119 | 0.547496  |
| 1  | -0.917924 | -1.010578 | -0.787820 |
| 8  | -1.246382 | 0.622831  | 0.353257  |
| 1  | -1.946475 | 1.081759  | 0.827205  |

-----

Cartesian coordinates of the methanol Trimer

Cartesian coordinates of : BL3

-----  
Atomic number (AN) and Cartesian coordinates

| AN | X         | Y         | Z         |
|----|-----------|-----------|-----------|
| 6  | -2.645100 | -0.507422 | -0.032877 |
| 1  | -2.253328 | -1.346524 | 0.557643  |
| 1  | -2.785543 | -0.841086 | -1.068931 |
| 1  | -3.618880 | -0.228098 | 0.373341  |
| 8  | -1.815847 | 0.632070  | 0.050540  |
| 1  | -0.951456 | 0.446612  | -0.343628 |
| 6  | 0.676674  | -1.776922 | 0.230901  |
| 1  | 0.022880  | -1.920740 | -0.641524 |
| 1  | 0.185009  | -1.078716 | 0.925404  |
| 1  | 0.787096  | -2.738559 | 0.736059  |
| 8  | 1.966305  | -1.342366 | -0.136995 |
| 1  | 1.866310  | -0.515906 | -0.629100 |
| 6  | 1.068286  | 1.766540  | 0.602738  |
| 1  | 0.133183  | 2.175788  | 0.995503  |
| 1  | 1.840324  | 2.540099  | 0.563114  |
| 1  | 1.411876  | 0.958189  | 1.250587  |
| 8  | 0.861703  | 1.182873  | -0.687809 |
| 1  | 0.666093  | 1.875138  | -1.328921 |

-----

Cartesian coordinates of : L3

-----  
Atomic number (AN) and Cartesian coordinates

| AN | X         | Y         | Z         |
|----|-----------|-----------|-----------|
| 8  | -1.446891 | -0.929978 | -0.101690 |
| 1  | -1.021677 | -0.144698 | -0.492859 |
| 8  | 0.081426  | 1.306576  | -0.705058 |
| 1  | 0.957028  | 0.884244  | -0.750508 |
| 8  | 2.321952  | -0.199958 | -0.149926 |
| 1  | 3.232970  | -0.288787 | -0.446055 |
| 6  | -2.826960 | -0.682416 | 0.047911  |

|   |           |           |           |
|---|-----------|-----------|-----------|
| 1 | -3.320561 | -0.507386 | -0.916625 |
| 1 | -3.273607 | -1.567702 | 0.505787  |
| 1 | -3.022903 | 0.178170  | 0.702306  |
| 6 | -0.007427 | 1.970347  | 0.545056  |
| 1 | 0.092018  | 1.266710  | 1.381170  |
| 1 | 0.757687  | 2.748525  | 0.639638  |
| 1 | -0.991756 | 2.440321  | 0.595344  |
| 6 | 1.820821  | -1.465786 | 0.282328  |
| 1 | 1.895289  | -2.213865 | -0.513082 |
| 1 | 2.358986  | -1.814308 | 1.169587  |
| 1 | 0.766032  | -1.327217 | 0.526921  |

-----

Cartesian coordinates of : CY3\_1

-----

Atomic number (AN) and Cartesian coordinates

| AN | X         | Y         | Z         |
|----|-----------|-----------|-----------|
| 6  | 2.033943  | 1.874016  | -0.127189 |
| 1  | 1.863761  | 2.011995  | -1.201742 |
| 1  | 3.075689  | 1.573389  | 0.032226  |
| 1  | 1.868767  | 2.827148  | 0.378395  |
| 8  | 1.134354  | 0.935970  | 0.431019  |
| 1  | 1.231641  | 0.070006  | -0.010406 |
| 6  | 0.510900  | -2.483977 | 0.366312  |
| 1  | -0.118616 | -3.339375 | 0.097815  |
| 1  | 0.141886  | -2.045854 | 1.301160  |
| 1  | 1.532506  | -2.836902 | 0.517404  |
| 8  | 0.545523  | -1.522066 | -0.676373 |
| 1  | -0.345138 | -1.140207 | -0.762059 |
| 6  | -2.707511 | 0.912648  | 0.019332  |
| 1  | -2.704668 | 1.791798  | -0.635819 |
| 1  | -2.945761 | 1.228715  | 1.041504  |
| 1  | -3.486288 | 0.228667  | -0.322213 |
| 8  | -1.479671 | 0.215665  | -0.035167 |
| 1  | -0.739420 | 0.777947  | 0.257176  |

-----

Cartesian coordinates of : CY3\_2

-----

Atomic number (AN) and Cartesian coordinates

| AN | X         | Y         | Z         |
|----|-----------|-----------|-----------|
| 6  | 2.000772  | -1.760571 | 0.234019  |
| 1  | 2.332803  | -1.142761 | 1.077602  |
| 1  | 2.820667  | -1.849774 | -0.487650 |
| 1  | 1.758645  | -2.757061 | 0.607231  |
| 8  | 0.834149  | -1.238827 | -0.371775 |
| 1  | 0.995643  | -0.328935 | -0.685969 |
| 6  | 1.011802  | 2.127541  | 0.439871  |
| 1  | 0.886836  | 1.495489  | 1.328381  |
| 1  | 0.513748  | 3.087089  | 0.616978  |
| 1  | 2.075885  | 2.312684  | 0.280162  |
| 8  | 0.511467  | 1.490943  | -0.723712 |
| 1  | -0.413616 | 1.239648  | -0.549274 |
| 6  | -2.834052 | -0.546478 | 0.013596  |
| 1  | -3.138799 | -1.295241 | 0.753577  |
| 1  | -2.879801 | -0.992299 | -0.986716 |
| 1  | -3.535542 | 0.288319  | 0.057276  |
| 8  | -1.546908 | -0.032452 | 0.299079  |
| 1  | -0.877264 | -0.737424 | 0.234746  |

-----

Cartesian coordinates of the methanol tetramer

Cartesian coordinates of : P4

-----  
Atomic number (AN) and Cartesian coordinates

| AN | X         | Y         | Z         |
|----|-----------|-----------|-----------|
| 8  | -1.452365 | 0.944141  | -0.777472 |
| 1  | -0.574393 | 0.820326  | -1.169368 |
| 8  | 1.355283  | 0.359301  | -0.814171 |
| 1  | 1.183940  | 0.537689  | 0.135518  |
| 8  | 0.101371  | 0.443422  | 1.576110  |
| 1  | -0.589267 | 0.028082  | 1.028269  |
| 6  | -2.401295 | 0.159703  | -1.481968 |
| 1  | -2.164678 | -0.907273 | -1.410479 |
| 1  | -3.372048 | 0.339757  | -1.016039 |
| 1  | -2.465682 | 0.456738  | -2.535734 |
| 6  | 2.617045  | 0.860343  | -1.218913 |
| 1  | 2.671340  | 1.947983  | -1.099702 |
| 1  | 3.431850  | 0.395094  | -0.653533 |
| 1  | 2.741532  | 0.618259  | -2.275393 |
| 6  | -0.399004 | 1.676390  | 2.074345  |
| 1  | -0.804579 | 2.290697  | 1.264286  |
| 1  | -1.179816 | 1.507640  | 2.823872  |
| 1  | 0.434284  | 2.195443  | 2.552063  |
| 6  | 0.349974  | -2.643147 | 0.814023  |
| 1  | -0.440029 | -3.160894 | 1.361116  |
| 1  | 0.999105  | -3.394546 | 0.348662  |
| 1  | 0.932705  | -2.045263 | 1.525316  |
| 8  | -0.280514 | -1.823540 | -0.155169 |
| 1  | 0.405217  | -1.336062 | -0.638162 |

-----

Cartesian coordinates of : BC4\_2

-----  
Atomic number (AN) and Cartesian coordinates

| AN | X         | Y         | Z         |
|----|-----------|-----------|-----------|
| 6  | 3.532026  | -0.442261 | -0.781302 |
| 1  | 4.342425  | 0.201246  | -0.422226 |
| 1  | 3.273249  | -0.157401 | -1.807246 |
| 1  | 3.882593  | -1.475347 | -0.780493 |
| 8  | 2.407083  | -0.377917 | 0.078040  |
| 1  | 2.031244  | 0.520301  | 0.079212  |
| 6  | -2.769816 | 0.300422  | -0.574424 |
| 1  | -2.175596 | 0.851343  | -1.318007 |
| 1  | -2.369338 | 0.521431  | 0.428903  |
| 1  | -3.796226 | 0.671306  | -0.614097 |
| 8  | -2.805519 | -1.081016 | -0.836806 |
| 1  | -1.892105 | -1.402859 | -0.817406 |
| 6  | -0.449180 | -1.463380 | 1.467313  |
| 1  | -0.021999 | -0.672994 | 2.096904  |
| 1  | -0.045627 | -2.429890 | 1.784171  |
| 1  | -1.535129 | -1.477685 | 1.587048  |
| 8  | -0.183419 | -1.220348 | 0.091698  |
| 1  | 0.785213  | -1.210629 | -0.042910 |
| 6  | -0.275547 | 2.595024  | 0.521788  |
| 1  | -0.594658 | 2.358005  | 1.544003  |
| 1  | -1.154198 | 2.872955  | -0.072098 |
| 1  | 0.403987  | 3.447856  | 0.556377  |
| 8  | 0.428430  | 1.519205  | -0.069588 |
| 1  | -0.131334 | 0.724131  | -0.109132 |

-----  
Cartesian coordinates of : CY4\_1  
-----

Atomic number (AN) and Cartesian coordinates

| AN | X         | Y         | Z         |
|----|-----------|-----------|-----------|
| 1  | 0.557719  | 3.531130  | 1.037335  |
| 6  | -0.180544 | 2.737313  | 1.195279  |
| 1  | 0.078717  | 2.185839  | 2.106478  |
| 1  | -1.161838 | 3.196613  | 1.329182  |
| 8  | -0.255070 | 1.879815  | 0.070440  |
| 1  | 0.598423  | 1.397045  | -0.028149 |
| 1  | 2.185847  | -0.078716 | -2.106479 |
| 6  | 2.737318  | 0.180545  | -1.195277 |
| 1  | 3.531134  | -0.557719 | -1.037331 |
| 1  | 3.196619  | 1.161838  | -1.329178 |
| 8  | 1.879816  | 0.255070  | -0.070441 |
| 1  | 1.397046  | -0.598423 | 0.028146  |
| 1  | -0.557718 | -3.531130 | 1.037335  |
| 6  | 0.180544  | -2.737313 | 1.195279  |
| 1  | -0.078718 | -2.185838 | 2.106478  |
| 1  | 1.161839  | -3.196613 | 1.329183  |
| 8  | 0.255071  | -1.879816 | 0.070439  |
| 1  | -0.598423 | -1.397046 | -0.028150 |
| 1  | -2.185848 | 0.078719  | -2.106479 |
| 6  | -2.737318 | -0.180544 | -1.195277 |
| 1  | -3.531134 | 0.557720  | -1.037329 |
| 1  | -3.196620 | -1.161837 | -1.329178 |
| 8  | -1.879815 | -0.255071 | -0.070442 |
| 1  | -1.397045 | 0.598423  | 0.028146  |

-----

Cartesian coordinates of : L4\_1  
-----

Atomic number (AN) and Cartesian coordinates

| AN | X         | Y         | Z         |
|----|-----------|-----------|-----------|
| 8  | 0.590431  | 1.709709  | -0.490415 |
| 1  | 1.101339  | 0.884815  | -0.593140 |
| 8  | 1.820914  | -0.729029 | -0.224553 |
| 1  | 1.026169  | -1.134130 | 0.186790  |
| 8  | -0.477777 | -1.393915 | 1.013470  |
| 1  | -1.264133 | -1.323216 | 0.442823  |
| 6  | 1.288999  | 2.544284  | 0.407952  |
| 1  | 2.238184  | 2.896531  | -0.015454 |
| 1  | 0.659881  | 3.414054  | 0.612191  |
| 1  | 1.501040  | 2.034845  | 1.357657  |
| 6  | 2.519439  | -1.681000 | -0.999851 |
| 1  | 2.879456  | -2.512254 | -0.382564 |
| 1  | 1.897907  | -2.083199 | -1.809351 |
| 1  | 3.382338  | -1.179232 | -1.442106 |
| 6  | -0.562358 | -0.358473 | 1.984840  |
| 1  | -0.625453 | 0.626235  | 1.506597  |
| 1  | -1.427255 | -0.506826 | 2.639844  |
| 1  | 0.348607  | -0.402788 | 2.585729  |
| 8  | -2.695460 | -0.624425 | -0.427046 |
| 1  | -3.502053 | -1.058378 | -0.720973 |
| 6  | -2.427477 | 0.524370  | -1.233443 |
| 1  | -2.314715 | 0.248461  | -2.286983 |
| 1  | -3.227767 | 1.264486  | -1.131907 |
| 1  | -1.490025 | 0.956797  | -0.877793 |

-----

Cartesian coordinates of : CY4\_3

-----  
Atomic number (AN) and Cartesian coordinates

| AN | X         | Y         | Z         |
|----|-----------|-----------|-----------|
| 6  | -2.663452 | 1.465281  | 0.195615  |
| 1  | -2.770472 | 2.551415  | 0.098997  |
| 1  | -2.610605 | 1.207608  | 1.260289  |
| 1  | -3.546737 | 0.991211  | -0.237747 |
| 8  | -1.531536 | 0.997409  | -0.513522 |
| 1  | -0.709093 | 1.352026  | -0.103221 |
| 6  | 1.747319  | 2.304616  | -0.275216 |
| 1  | 1.865978  | 1.781281  | -1.232164 |
| 1  | 2.730304  | 2.418782  | 0.195351  |
| 1  | 1.337436  | 3.297549  | -0.469117 |
| 8  | 0.847040  | 1.624434  | 0.581839  |
| 1  | 1.172927  | 0.704198  | 0.699523  |
| 6  | 2.663456  | -1.465302 | -0.195691 |
| 1  | 2.610617  | -1.207606 | -1.260360 |
| 1  | 2.770457  | -2.551440 | -0.099094 |
| 1  | 3.546746  | -0.991255 | 0.237686  |
| 8  | 1.531544  | -0.997427 | 0.513452  |
| 1  | 0.709099  | -1.352043 | 0.103158  |
| 6  | -1.747295 | -2.304555 | 0.275354  |
| 1  | -2.730319 | -2.418763 | -0.195121 |
| 1  | -1.865875 | -1.781124 | 1.232261  |
| 1  | -1.337402 | -3.297471 | 0.469322  |
| 8  | -0.847081 | -1.624463 | -0.581840 |
| 1  | -1.172957 | -0.704228 | -0.699564 |

-----  
Cartesian coordinates of : CY4\_4-----  
Atomic number (AN) and Cartesian coordinates

| AN | X         | Y         | Z         |
|----|-----------|-----------|-----------|
| 6  | -0.065238 | 2.384102  | 0.804013  |
| 8  | 0.095900  | 1.738507  | -0.443593 |
| 8  | -1.939634 | -0.023314 | -0.795298 |
| 6  | -3.072066 | -0.171650 | 0.039661  |
| 8  | 1.970422  | -0.207746 | -0.830256 |
| 6  | 3.052179  | -0.083421 | 0.071775  |
| 8  | -0.070549 | -1.934182 | -0.291764 |
| 6  | 0.041253  | -1.763631 | 1.109783  |
| 1  | -0.358164 | 1.679216  | 1.593597  |
| 1  | -0.816213 | 3.180258  | 0.745695  |
| 1  | 0.892823  | 2.832454  | 1.075644  |
| 1  | -0.721802 | 1.234441  | -0.646824 |
| 1  | -2.788818 | -0.289316 | 1.094056  |
| 1  | -3.678722 | -1.031953 | -0.263265 |
| 1  | -3.677400 | 0.731344  | -0.059870 |
| 1  | -1.380205 | -0.828830 | -0.742348 |
| 1  | 0.045646  | -0.698368 | 1.383467  |
| 1  | 0.953126  | -2.231220 | 1.498235  |
| 1  | -0.821703 | -2.245657 | 1.574682  |
| 1  | 0.718442  | -1.504740 | -0.682906 |
| 1  | 2.706635  | 0.071872  | 1.102990  |
| 1  | 3.712638  | 0.744825  | -0.209250 |
| 1  | 3.626058  | -1.011522 | 0.033564  |
| 1  | 1.401776  | 0.588669  | -0.761565 |

-----  
Cartesian coordinates of : CY4\_2

-----  
Atomic number (AN) and Cartesian coordinates

| AN | X         | Y         | Z         |
|----|-----------|-----------|-----------|
| 6  | -3.190249 | 0.023554  | -0.658426 |
| 8  | -1.978508 | 0.118498  | 0.068622  |
| 8  | -0.211143 | -1.906609 | -0.136381 |
| 6  | 0.258538  | -2.198150 | 1.168428  |
| 8  | 0.060312  | 1.856540  | -0.220422 |
| 6  | 0.354492  | 2.321398  | 1.084562  |
| 8  | 1.672633  | -0.166293 | -1.018575 |
| 6  | 2.970371  | -0.062377 | -0.466442 |
| 1  | -3.824970 | -0.777432 | -0.264039 |
| 1  | -3.009001 | -0.155866 | -1.724269 |
| 1  | -3.718180 | 0.972435  | -0.547172 |
| 1  | -1.455561 | -0.709759 | -0.032221 |
| 1  | 0.574553  | -1.287568 | 1.694243  |
| 1  | 1.097769  | -2.902163 | 1.139260  |
| 1  | -0.562209 | -2.655073 | 1.724317  |
| 1  | 0.504764  | -1.423103 | -0.602870 |
| 1  | 2.939532  | 0.108550  | 0.617814  |
| 1  | 3.539002  | 0.747459  | -0.937373 |
| 1  | 3.489537  | -1.004171 | -0.655313 |
| 1  | 1.166121  | 0.655012  | -0.825391 |
| 1  | 0.427194  | 1.494249  | 1.802433  |
| 1  | -0.407443 | 3.025275  | 1.436232  |
| 1  | 1.314953  | 2.839980  | 1.044525  |
| 1  | -0.781321 | 1.348548  | -0.184868 |

-----

Cartesian coordinates of : BC4\_1

-----  
Atomic number (AN) and Cartesian coordinates

| AN | X         | Y         | Z         |
|----|-----------|-----------|-----------|
| 8  | -1.326990 | -0.950682 | -1.052609 |
| 6  | -2.689646 | -1.001462 | -0.658916 |
| 1  | -2.836687 | -0.561803 | 0.335861  |
| 1  | -3.334050 | -0.486649 | -1.379758 |
| 1  | -2.977257 | -2.053257 | -0.622723 |
| 1  | -1.044983 | -0.020841 | -1.033630 |
| 8  | 2.268541  | 0.668125  | -0.702485 |
| 6  | 1.876290  | -0.278625 | -1.673756 |
| 1  | 1.245031  | -1.073862 | -1.250871 |
| 1  | 1.329578  | 0.183444  | -2.505974 |
| 1  | 2.784089  | -0.736688 | -2.071967 |
| 1  | 1.475049  | 1.147072  | -0.417292 |
| 8  | -0.032040 | -0.981549 | 1.407958  |
| 6  | 1.273112  | -1.444734 | 1.741363  |
| 1  | 1.310493  | -2.538860 | 1.739339  |
| 1  | 2.025062  | -1.039297 | 1.055577  |
| 1  | 1.486680  | -1.092396 | 2.751708  |
| 1  | -0.317410 | -1.344659 | 0.550187  |
| 8  | -0.335613 | 1.387914  | 0.184521  |
| 6  | -0.869979 | 2.589514  | 0.716172  |
| 1  | -1.865749 | 2.426810  | 1.143172  |
| 1  | -0.213635 | 3.011483  | 1.484488  |
| 1  | -0.951564 | 3.302938  | -0.105055 |
| 1  | -0.244492 | 0.697940  | 0.878678  |

-----

Cartesian coordinates of : BL4

-----  
Atomic number (AN) and Cartesian coordinates

| AN | X         | Y         | Z         |
|----|-----------|-----------|-----------|
| 8  | 1.811234  | -0.293706 | 0.926805  |
| 6  | 3.054823  | -0.255468 | 0.259710  |
| 1  | 3.447556  | -1.261129 | 0.065529  |
| 1  | 2.990499  | 0.280695  | -0.697889 |
| 1  | 3.760209  | 0.271661  | 0.905859  |
| 1  | 1.175645  | -0.749706 | 0.346634  |
| 8  | -0.735271 | 1.555671  | -1.176161 |
| 6  | 0.170412  | 2.322896  | -0.371590 |
| 1  | 0.836957  | 2.919329  | -1.001224 |
| 1  | -0.380910 | 2.975432  | 0.312343  |
| 1  | 0.758228  | 1.605576  | 0.206393  |
| 1  | -1.274143 | 2.141588  | -1.718535 |
| 8  | 0.091862  | -1.129214 | -1.086657 |
| 6  | -0.932959 | -2.112040 | -1.152023 |
| 1  | -1.821479 | -1.798851 | -0.592112 |
| 1  | -1.206575 | -2.325676 | -2.191181 |
| 1  | -0.530344 | -3.022852 | -0.705493 |
| 1  | -0.244102 | -0.275742 | -1.402113 |
| 8  | -2.231981 | 0.166202  | 0.900047  |
| 6  | -1.301880 | -0.337998 | 1.841623  |
| 1  | -0.798861 | -1.243180 | 1.475499  |
| 1  | -0.529654 | 0.395655  | 2.101162  |
| 1  | -1.861726 | -0.593525 | 2.743493  |
| 1  | -1.750420 | 0.584760  | 0.173038  |

Cartesian coordinates of : L4\_2

Atomic number (AN) and Cartesian coordinates

| AN | X         | Y         | Z         |
|----|-----------|-----------|-----------|
| 8  | 3.183072  | -0.826081 | -0.375495 |
| 6  | 3.439145  | 0.422943  | 0.254360  |
| 1  | 4.000169  | 0.292631  | 1.185324  |
| 1  | 3.978375  | 1.105404  | -0.410228 |
| 1  | 2.463772  | 0.856653  | 0.484852  |
| 1  | 4.007524  | -1.246005 | -0.639484 |
| 8  | 0.431426  | -0.773805 | -0.510506 |
| 6  | 0.196277  | -1.278226 | 0.798601  |
| 1  | 0.208768  | -2.373699 | 0.804873  |
| 1  | 0.950738  | -0.911825 | 1.506360  |
| 1  | -0.792526 | -0.931102 | 1.110367  |
| 1  | 1.353501  | -0.955005 | -0.751926 |
| 8  | -1.087619 | 1.486937  | -0.683230 |
| 6  | -0.391462 | 2.266326  | 0.268482  |
| 1  | -0.132728 | 1.679630  | 1.161147  |
| 1  | 0.525913  | 2.694261  | -0.155599 |
| 1  | -1.046011 | 3.085901  | 0.571286  |
| 1  | -0.537807 | 0.702419  | -0.871602 |
| 8  | -2.988108 | -0.131371 | 0.589612  |
| 6  | -3.123266 | -1.140543 | -0.389008 |
| 1  | -3.779613 | -0.828648 | -1.211576 |
| 1  | -2.151821 | -1.435968 | -0.811578 |
| 1  | -3.569947 | -2.012204 | 0.095274  |
| 1  | -2.512641 | 0.609115  | 0.174840  |

Cartesian coordinates of the methanol pentamer

Cartesian coordinates of : BC5\_1

-----  
Atomic number (AN) and Cartesian coordinates

| AN | X         | Y         | Z         |
|----|-----------|-----------|-----------|
| 8  | 0.559649  | -0.363488 | -1.723089 |
| 1  | -0.391625 | -0.272966 | -1.554687 |
| 8  | -1.870980 | -0.106870 | -0.340084 |
| 1  | -1.398343 | -0.697901 | 0.311501  |
| 8  | 1.700498  | 0.199321  | 1.099085  |
| 1  | 1.219798  | 0.825235  | 0.520434  |
| 6  | 1.005994  | 0.717180  | -2.522605 |
| 1  | 0.802984  | 1.683120  | -2.045080 |
| 1  | 2.086814  | 0.604974  | -2.640914 |
| 1  | 0.549903  | 0.700268  | -3.520018 |
| 6  | -3.265638 | -0.354611 | -0.329859 |
| 1  | -3.486450 | -1.384939 | -0.630031 |
| 1  | -3.694154 | -0.171867 | 0.661664  |
| 1  | -3.731974 | 0.324953  | -1.045456 |
| 6  | 2.843911  | -0.309147 | 0.429781  |
| 1  | 2.559830  | -0.835995 | -0.487496 |
| 1  | 3.545921  | 0.496583  | 0.186460  |
| 1  | 3.338588  | -1.002182 | 1.113681  |
| 6  | 0.092190  | -2.706761 | 0.522599  |
| 1  | -0.773161 | -3.359044 | 0.385619  |
| 1  | 0.506151  | -2.440817 | -0.456575 |
| 1  | 0.844245  | -3.247719 | 1.107092  |
| 8  | -0.348347 | -1.548049 | 1.222055  |
| 1  | 0.422689  | -0.936577 | 1.303727  |
| 6  | -0.475383 | 2.484665  | 1.504411  |
| 1  | 0.395164  | 3.041883  | 1.854139  |
| 1  | -1.341939 | 3.155110  | 1.489468  |
| 1  | -0.665483 | 1.661730  | 2.204469  |
| 8  | -0.176859 | 2.000473  | 0.203665  |
| 1  | -0.907086 | 1.417101  | -0.077005 |

-----  
Cartesian coordinates of : DC5-----  
Atomic number (AN) and Cartesian coordinates

| AN | X         | Y         | Z         |
|----|-----------|-----------|-----------|
| 8  | 2.008917  | -0.378285 | 0.164369  |
| 1  | 1.395530  | 0.235231  | -0.283393 |
| 8  | 0.088155  | 0.955721  | -1.346733 |
| 1  | -0.761757 | 0.636365  | -0.980269 |
| 8  | -0.374300 | -1.857996 | 0.785882  |
| 1  | 0.337752  | -1.245428 | 1.054053  |
| 6  | 2.957332  | -0.831873 | -0.777673 |
| 1  | 3.623860  | -0.023621 | -1.104527 |
| 1  | 3.562734  | -1.601593 | -0.293394 |
| 1  | 2.478323  | -1.268907 | -1.664125 |
| 6  | -0.055692 | 2.305921  | -1.743684 |
| 1  | -0.690542 | 2.395335  | -2.632804 |
| 1  | -0.481057 | 2.921852  | -0.941033 |
| 1  | 0.937789  | 2.689213  | -1.986159 |
| 6  | 0.042592  | -2.555007 | -0.376801 |
| 1  | 0.127180  | -1.880739 | -1.239320 |
| 1  | 1.008185  | -3.044643 | -0.216646 |
| 1  | -0.711523 | -3.316644 | -0.586848 |
| 8  | -0.035741 | 0.736265  | 1.840406  |
| 1  | -0.881356 | 1.006891  | 1.456989  |
| 6  | 0.860022  | 1.829001  | 1.893279  |
| 1  | 1.025894  | 2.267567  | 0.900066  |
| 1  | 0.505963  | 2.610100  | 2.577317  |



|   |           |           |           |
|---|-----------|-----------|-----------|
| 1 | 1.812745  | 1.440091  | 2.253592  |
| 6 | -3.384954 | -0.351776 | -0.279409 |
| 1 | -3.896267 | 0.531009  | -0.667944 |
| 1 | -3.386562 | -1.127480 | -1.054169 |
| 1 | -3.933376 | -0.718543 | 0.594626  |
| 8 | -2.066104 | 0.028238  | 0.069546  |
| 1 | -1.556731 | -0.755194 | 0.411967  |

-----  
Cartesian coordinates of : BL5

-----  
Atomic number (AN) and Cartesian coordinates

| AN | X         | Y         | Z         |
|----|-----------|-----------|-----------|
| 8  | 0.363080  | -1.324935 | -1.227056 |
| 1  | -0.115530 | -0.488107 | -1.345497 |
| 8  | -0.928423 | 1.116462  | -0.769348 |
| 1  | -0.168783 | 1.275848  | -0.145748 |
| 8  | 0.990636  | 1.211667  | 0.999023  |
| 1  | 1.913232  | 1.149979  | 0.689451  |
| 6  | -0.532348 | -2.272652 | -0.675481 |
| 1  | -1.271361 | -2.607110 | -1.415540 |
| 1  | 0.056644  | -3.140261 | -0.367263 |
| 1  | -1.060541 | -1.873643 | 0.200345  |
| 6  | -1.313712 | 2.327482  | -1.397971 |
| 1  | -1.628047 | 3.073277  | -0.659737 |
| 1  | -0.496145 | 2.739496  | -1.999349 |
| 1  | -2.155685 | 2.107546  | -2.057219 |
| 6  | 0.725902  | 0.071795  | 1.814209  |
| 1  | 1.014294  | -0.850629 | 1.297077  |
| 1  | 1.262356  | 0.148028  | 2.765683  |
| 1  | -0.348990 | 0.043769  | 2.008382  |
| 8  | 3.525472  | 0.529398  | 0.187698  |
| 1  | 4.388074  | 0.736910  | 0.559538  |
| 6  | 3.537963  | -0.770514 | -0.405342 |
| 1  | 4.236423  | -0.806384 | -1.247400 |
| 1  | 3.810940  | -1.534659 | 0.330651  |
| 1  | 2.525499  | -0.965018 | -0.765281 |
| 6  | -3.769472 | -0.697549 | 0.458522  |
| 1  | -4.325210 | -1.232496 | 1.231638  |
| 1  | -4.432270 | 0.061988  | 0.023141  |
| 1  | -3.496833 | -1.414948 | -0.328438 |
| 8  | -2.634895 | -0.124244 | 1.068303  |
| 1  | -2.125025 | 0.358256  | 0.392972  |

-----  
Cartesian coordinates of : BC5\_2

-----  
Atomic number (AN) and Cartesian coordinates

| AN | X         | Y         | Z         |
|----|-----------|-----------|-----------|
| 1  | -4.312010 | 0.725019  | -0.621449 |
| 6  | -3.767931 | -0.121300 | -0.188041 |
| 1  | -3.779662 | -0.030198 | 0.904336  |
| 1  | -4.278135 | -1.044142 | -0.470275 |
| 8  | -2.446197 | -0.187664 | -0.691750 |
| 1  | -1.934363 | 0.594721  | -0.380482 |
| 1  | 0.562029  | -1.033531 | -1.633075 |
| 6  | 0.226000  | -2.027093 | -1.310690 |
| 1  | -0.361115 | -2.491186 | -2.108916 |
| 1  | 1.099135  | -2.651908 | -1.108859 |
| 8  | -0.530810 | -1.950848 | -0.107213 |
| 1  | -1.348613 | -1.432518 | -0.298632 |
| 1  | 0.570488  | 2.396849  | -0.937776 |

|   |           |           |           |
|---|-----------|-----------|-----------|
| 6 | -0.254518 | 2.759598  | -0.318566 |
| 1 | 0.117079  | 3.520180  | 0.376724  |
| 1 | -1.020941 | 3.211680  | -0.951016 |
| 8 | -0.873418 | 1.691547  | 0.392233  |
| 1 | -0.197410 | 1.152814  | 0.844660  |
| 1 | 1.630449  | -1.577621 | 2.811636  |
| 6 | 1.058846  | -0.646476 | 2.736981  |
| 1 | 0.115263  | -0.761205 | 3.281135  |
| 1 | 1.634777  | 0.157989  | 3.197937  |
| 8 | 0.829157  | -0.294840 | 1.382639  |
| 1 | 0.309752  | -1.007688 | 0.914010  |
| 1 | 3.184713  | -0.995893 | -1.419362 |
| 6 | 3.410543  | 0.057624  | -1.203737 |
| 1 | 4.237782  | 0.097616  | -0.483679 |
| 1 | 3.739139  | 0.533203  | -2.130068 |
| 8 | 2.275578  | 0.759373  | -0.746537 |
| 1 | 1.959530  | 0.361169  | 0.082493  |

-----

Cartesian coordinates of : L5

-----

Atomic number (AN) and Cartesian coordinates

| AN | X         | Y         | Z         |
|----|-----------|-----------|-----------|
| 8  | 2.720621  | -0.360352 | 0.155437  |
| 1  | 2.087339  | 0.345530  | 0.380788  |
| 8  | 0.592768  | 1.388530  | 0.537779  |
| 1  | 0.183119  | 1.102813  | -0.316900 |
| 8  | -0.375671 | 0.416599  | -1.740958 |
| 1  | -0.746753 | -0.437883 | -1.420993 |
| 6  | 3.130792  | -1.001653 | 1.341001  |
| 1  | 2.287651  | -1.465166 | 1.874378  |
| 1  | 3.835611  | -1.789154 | 1.064796  |
| 1  | 3.637111  | -0.313077 | 2.029827  |
| 6  | 0.554221  | 2.798722  | 0.627957  |
| 1  | 1.084455  | 3.274340  | -0.205808 |
| 1  | -0.479090 | 3.169701  | 0.644548  |
| 1  | 1.040563  | 3.088765  | 1.561409  |
| 6  | 0.748295  | 0.145442  | -2.574521 |
| 1  | 1.546712  | -0.356339 | -2.015506 |
| 1  | 0.454231  | -0.465730 | -3.433854 |
| 1  | 1.121208  | 1.104427  | -2.940335 |
| 8  | -1.198704 | -1.812123 | -0.489623 |
| 1  | -2.023227 | -1.586075 | -0.022005 |
| 6  | -0.154625 | -1.958596 | 0.468600  |
| 1  | 0.781459  | -2.081478 | -0.080218 |
| 1  | -0.061633 | -1.063493 | 1.097606  |
| 1  | -0.325140 | -2.836052 | 1.101039  |
| 8  | -3.252127 | -0.526986 | 0.839739  |
| 1  | -4.157949 | -0.525011 | 0.513234  |
| 6  | -2.701980 | 0.787357  | 0.735885  |
| 1  | -2.608756 | 1.100894  | -0.310125 |
| 1  | -3.308821 | 1.510289  | 1.289974  |
| 1  | -1.703396 | 0.749722  | 1.175615  |

-----

Cartesian coordinates of : CY5\_1

-----

Atomic number (AN) and Cartesian coordinates

| AN | X         | Y         | Z         |
|----|-----------|-----------|-----------|
| 1  | -3.563871 | -2.031122 | -1.391265 |
| 6  | -3.103904 | -1.048107 | -1.538709 |
| 1  | -2.465726 | -1.081527 | -2.429301 |

|   |           |           |           |
|---|-----------|-----------|-----------|
| 1 | -3.895217 | -0.314086 | -1.702219 |
| 8 | -2.377815 | -0.650799 | -0.390396 |
| 1 | -1.632037 | -1.275940 | -0.217770 |
| 1 | -1.672397 | 1.197204  | 2.122111  |
| 6 | -1.672979 | 2.040187  | 1.421112  |
| 1 | -2.690612 | 2.437784  | 1.344839  |
| 1 | -1.018669 | 2.822842  | 1.811660  |
| 8 | -1.180689 | 1.657978  | 0.148835  |
| 1 | -1.676984 | 0.861039  | -0.157879 |
| 1 | 0.344344  | -0.440660 | 1.580360  |
| 6 | -0.032197 | -1.470459 | 1.646656  |
| 1 | 0.675435  | -2.073075 | 2.227668  |
| 1 | -0.993671 | -1.462786 | 2.166172  |
| 8 | -0.239861 | -2.028702 | 0.358627  |
| 1 | 0.570388  | -1.840414 | -0.168754 |
| 1 | 1.725438  | 3.473354  | -0.402791 |
| 6 | 1.893661  | 2.524760  | -0.924674 |
| 1 | 1.390995  | 2.559910  | -1.897780 |
| 1 | 2.966779  | 2.402746  | -1.086872 |
| 8 | 1.444814  | 1.429801  | -0.146030 |
| 1 | 0.466282  | 1.506926  | -0.019720 |
| 1 | 3.108572  | -1.058152 | 1.082165  |
| 6 | 3.187250  | -1.438412 | 0.055959  |
| 1 | 4.097168  | -1.034006 | -0.402035 |
| 1 | 3.269558  | -2.527062 | 0.088243  |
| 8 | 2.041272  | -1.111275 | -0.708828 |
| 1 | 1.861469  | -0.146818 | -0.606566 |

-----  
Cartesian coordinates of : CY5\_2

-----  
Atomic number (AN) and Cartesian coordinates

| AN | X         | Y         | Z         |
|----|-----------|-----------|-----------|
| 1  | -1.187419 | 2.986510  | 1.486756  |
| 6  | -1.661282 | 2.046984  | 1.181809  |
| 1  | -1.455975 | 1.285895  | 1.945872  |
| 1  | -2.740669 | 2.205424  | 1.124867  |
| 8  | -1.213884 | 1.641344  | -0.097690 |
| 1  | -0.227612 | 1.575738  | -0.084925 |
| 1  | -4.186511 | -0.184145 | -1.157903 |
| 6  | -3.513257 | -0.869284 | -0.630420 |
| 1  | -3.632572 | -0.721224 | 0.451423  |
| 1  | -3.799631 | -1.894161 | -0.873917 |
| 8  | -2.172614 | -0.685047 | -1.040294 |
| 1  | -1.873595 | 0.217393  | -0.781177 |
| 1  | 2.112460  | 2.282828  | -1.743641 |
| 6  | 2.159278  | 2.453552  | -0.662534 |
| 1  | 3.208446  | 2.481017  | -0.348270 |
| 1  | 1.703448  | 3.420575  | -0.439341 |
| 8  | 1.441498  | 1.460898  | 0.051460  |
| 1  | 1.778842  | 0.566565  | -0.206247 |
| 1  | -1.305549 | -1.397879 | 1.642168  |
| 6  | -0.255692 | -1.476314 | 1.337238  |
| 1  | 0.194965  | -0.473618 | 1.367744  |
| 1  | 0.266383  | -2.121181 | 2.048301  |
| 8  | -0.143245 | -2.057660 | 0.048184  |
| 1  | -0.881504 | -1.696461 | -0.493189 |
| 1  | 3.327171  | -2.652343 | -0.067369 |
| 6  | 3.168777  | -1.606495 | 0.214967  |
| 1  | 2.866398  | -1.562107 | 1.269085  |
| 1  | 4.110194  | -1.066026 | 0.098394  |
| 8  | 2.210294  | -0.991866 | -0.628891 |
| 1  | 1.359389  | -1.484810 | -0.547153 |

-----

Cartesian coordinates of : CY5\_3

-----  
Atomic number (AN) and Cartesian coordinates

| AN | X         | Y         | Z         |
|----|-----------|-----------|-----------|
| 1  | -0.745036 | -1.531630 | 2.133681  |
| 6  | 0.012313  | -1.131084 | 1.449634  |
| 1  | -0.280027 | -0.117993 | 1.140172  |
| 1  | 0.965325  | -1.075656 | 1.982826  |
| 8  | 0.190668  | -1.978599 | 0.328094  |
| 1  | -0.631560 | -1.911237 | -0.206323 |
| 1  | 3.750811  | -2.188631 | -0.547613 |
| 6  | 3.503844  | -1.166540 | -0.241560 |
| 1  | 3.484026  | -1.119498 | 0.855093  |
| 1  | 4.284866  | -0.496136 | -0.605869 |
| 8  | 2.277206  | -0.746606 | -0.807034 |
| 1  | 1.545055  | -1.326953 | -0.493578 |
| 1  | -4.165996 | -0.935070 | -0.462791 |
| 6  | -3.270811 | -1.331336 | 0.030024  |
| 1  | -3.121032 | -0.796065 | 0.977867  |
| 1  | -3.434011 | -2.388496 | 0.249118  |
| 8  | -2.136949 | -1.232189 | -0.810417 |
| 1  | -1.929309 | -0.279711 | -0.930897 |
| 1  | 2.776961  | 2.457482  | 0.578310  |
| 6  | 1.718683  | 2.191477  | 0.682291  |
| 1  | 1.614688  | 1.466659  | 1.500708  |
| 1  | 1.160764  | 3.094137  | 0.941915  |
| 8  | 1.196165  | 1.689256  | -0.531915 |
| 1  | 1.651795  | 0.839755  | -0.737052 |
| 1  | -1.797094 | 3.253989  | 0.135191  |
| 6  | -2.012392 | 2.190825  | 0.292216  |
| 1  | -1.618616 | 1.890644  | 1.273699  |
| 1  | -3.096323 | 2.055616  | 0.297290  |
| 8  | -1.479784 | 1.400962  | -0.752144 |
| 1  | -0.503554 | 1.526148  | -0.770048 |

  
-----

Cartesian coordinates of : P5

-----  
Atomic number (AN) and Cartesian coordinates

| AN | X         | Y         | Z         |
|----|-----------|-----------|-----------|
| 6  | -0.618461 | 3.114815  | -0.701405 |
| 1  | -1.542206 | 3.474104  | -0.234620 |
| 1  | -0.741250 | 3.116004  | -1.789766 |
| 1  | 0.192974  | 3.795631  | -0.438384 |
| 8  | -0.270600 | 1.825731  | -0.226651 |
| 1  | -0.963347 | 1.163880  | -0.472363 |
| 6  | 0.756924  | -2.708475 | -0.990074 |
| 1  | 1.538761  | -3.323073 | -0.530784 |
| 1  | 1.204835  | -2.054754 | -1.743021 |
| 1  | 0.023612  | -3.369571 | -1.456477 |
| 8  | 0.072043  | -1.949358 | -0.002534 |
| 1  | 0.670955  | -1.269799 | 0.363780  |
| 6  | -0.520231 | -0.253600 | 2.547115  |
| 1  | -1.426322 | -0.282872 | 1.928425  |
| 1  | -0.683906 | 0.425106  | 3.392531  |
| 1  | -0.332307 | -1.258014 | 2.930232  |
| 8  | 0.611750  | 0.128643  | 1.786038  |
| 1  | 0.393922  | 0.942444  | 1.301373  |
| 6  | -3.118272 | -0.654397 | -0.502910 |
| 1  | -3.216313 | -0.950747 | 0.548652  |
| 1  | -3.437288 | -1.489622 | -1.136189 |

|   |           |           |           |
|---|-----------|-----------|-----------|
| 1 | -3.778985 | 0.194628  | -0.690416 |
| 8 | -1.797800 | -0.256336 | -0.814939 |
| 1 | -1.155718 | -0.971244 | -0.570356 |
| 6 | 3.079013  | 0.522768  | -0.198114 |
| 1 | 2.867760  | 0.609175  | 0.874382  |
| 1 | 3.493528  | 1.469267  | -0.567218 |
| 1 | 3.829596  | -0.257346 | -0.343453 |
| 8 | 1.926898  | 0.136767  | -0.925049 |
| 1 | 1.249544  | 0.826559  | -0.828921 |

-----

Cartesian coordinates of the methanol hexamer

Cartesian coordinates of : BC6\_4

-----

Atomic number (AN) and Cartesian coordinates

| AN | X         | Y         | Z         |
|----|-----------|-----------|-----------|
| 6  | -0.852583 | 1.445697  | 2.457404  |
| 1  | -1.812562 | 0.980481  | 2.210639  |
| 1  | -0.961658 | 2.535334  | 2.478102  |
| 1  | -0.527322 | 1.109556  | 3.443856  |
| 8  | 0.143748  | 1.058663  | 1.517853  |
| 1  | -0.150399 | 1.316080  | 0.601925  |
| 6  | 1.310362  | -1.180265 | -2.254645 |
| 1  | 1.396231  | -2.205510 | -2.631882 |
| 1  | 2.140168  | -0.964723 | -1.573754 |
| 1  | 1.354831  | -0.491689 | -3.101833 |
| 8  | 0.061159  | -0.988603 | -1.602616 |
| 1  | 0.134350  | -1.327602 | -0.685390 |
| 6  | 1.387218  | -2.317137 | 1.493488  |
| 1  | 1.404141  | -2.398076 | 2.585448  |
| 1  | 2.300835  | -1.825827 | 1.144156  |
| 1  | 1.325234  | -3.321597 | 1.070614  |
| 8  | 0.237073  | -1.600321 | 1.057733  |
| 1  | 0.298834  | -0.655247 | 1.333059  |
| 6  | -3.050023 | -1.252221 | -0.618386 |
| 1  | -3.818077 | -0.532989 | -0.913210 |
| 1  | -2.390325 | -1.437752 | -1.474315 |
| 1  | -3.549612 | -2.185926 | -0.333214 |
| 8  | -2.340187 | -0.684690 | 0.469182  |
| 1  | -1.664124 | -1.310596 | 0.768373  |
| 6  | -1.841682 | 1.998943  | -1.212994 |
| 1  | -1.862970 | 3.081198  | -1.068010 |
| 1  | -2.160165 | 1.778760  | -2.237620 |
| 1  | -2.530006 | 1.519646  | -0.508368 |
| 8  | -0.507706 | 1.563695  | -0.992974 |
| 1  | -0.394792 | 0.636425  | -1.311406 |
| 6  | 2.880118  | 1.481479  | -0.615162 |
| 1  | 1.966537  | 1.814343  | -1.123129 |
| 1  | 3.375617  | 2.348265  | -0.161033 |
| 1  | 3.560129  | 1.048765  | -1.352978 |
| 8  | 2.604938  | 0.475552  | 0.345332  |
| 1  | 1.972445  | 0.835330  | 0.985656  |

-----

Cartesian coordinates of : BC6\_6

-----

Atomic number (AN) and Cartesian coordinates

| AN | X        | Y         | Z         |
|----|----------|-----------|-----------|
| 8  | 3.938372 | -0.511265 | -0.454397 |

|   |           |           |           |
|---|-----------|-----------|-----------|
| 1 | 3.354964  | -0.597827 | 0.315639  |
| 8 | 1.775104  | -0.447313 | 1.363421  |
| 1 | 1.192953  | -1.130614 | 0.935546  |
| 8 | 0.247416  | -1.956065 | -0.143048 |
| 1 | -0.629652 | -1.528882 | -0.184104 |
| 6 | 3.707460  | 0.760673  | -1.018072 |
| 1 | 3.940134  | 1.571557  | -0.312971 |
| 1 | 4.366863  | 0.863371  | -1.882528 |
| 1 | 2.668006  | 0.880781  | -1.356884 |
| 6 | 1.735795  | -0.573601 | 2.778677  |
| 1 | 0.722270  | -0.413772 | 3.161843  |
| 1 | 2.089121  | -1.560388 | 3.092788  |
| 1 | 2.397109  | 0.186769  | 3.197135  |
| 6 | 0.879466  | -1.752993 | -1.406701 |
| 1 | 0.419631  | -2.384369 | -2.173807 |
| 1 | 0.815243  | -0.699923 | -1.708264 |
| 1 | 1.932797  | -2.018965 | -1.300426 |
| 8 | -1.772938 | -0.107136 | -0.494477 |
| 1 | -1.084235 | 0.575160  | -0.318738 |
| 6 | -2.275462 | 0.073960  | -1.814299 |
| 1 | -2.987634 | 0.905933  | -1.847484 |
| 1 | -1.460736 | 0.260943  | -2.522169 |
| 1 | -2.791113 | -0.844298 | -2.102604 |
| 6 | 0.640284  | 2.798073  | 0.030213  |
| 1 | -0.060104 | 3.316922  | -0.626094 |
| 1 | 0.478805  | 3.140604  | 1.057779  |
| 1 | 1.661810  | 3.045632  | -0.279113 |
| 8 | 0.396510  | 1.407021  | -0.098863 |
| 1 | 0.982807  | 0.894933  | 0.497119  |
| 6 | -5.044295 | -0.434051 | 0.507926  |
| 1 | -6.050735 | -0.134033 | 0.807033  |
| 1 | -5.057788 | -0.643409 | -0.571473 |
| 1 | -4.789122 | -1.360561 | 1.038931  |
| 8 | -4.171509 | 0.624247  | 0.833163  |
| 1 | -3.274525 | 0.366145  | 0.569975  |

-----

Cartesian coordinates of : BL6\_2

-----

Atomic number (AN) and Cartesian coordinates

| AN | X         | Y         | Z         |
|----|-----------|-----------|-----------|
| 8  | 1.243565  | 1.451165  | -0.961910 |
| 1  | 1.198477  | 0.511948  | -0.711136 |
| 8  | 0.446029  | -1.203857 | -0.416218 |
| 1  | -0.405501 | -0.923285 | -0.028743 |
| 8  | -0.877359 | 0.380966  | 1.496143  |
| 1  | -1.645388 | 0.932225  | 1.289918  |
| 6  | 2.468465  | 2.017800  | -0.540385 |
| 1  | 3.285595  | 1.774248  | -1.232714 |
| 1  | 2.343041  | 3.103811  | -0.530709 |
| 1  | 2.748598  | 1.677595  | 0.463572  |
| 6  | 0.207341  | -1.944006 | -1.602856 |
| 1  | -0.407939 | -2.826258 | -1.401850 |
| 1  | -0.296663 | -1.328827 | -2.355070 |
| 1  | 1.179401  | -2.261178 | -1.987121 |
| 6  | 0.153415  | 1.198041  | 2.037371  |
| 1  | 0.330700  | 2.078244  | 1.409063  |
| 1  | -0.089366 | 1.513011  | 3.059082  |
| 1  | 1.069347  | 0.603295  | 2.056207  |
| 8  | -2.887834 | 1.491615  | -0.109238 |
| 1  | -3.752999 | 1.903657  | -0.202700 |
| 6  | -2.032228 | 1.892463  | -1.191240 |
| 1  | -2.361565 | 1.438033  | -2.130548 |
| 1  | -2.016930 | 2.981566  | -1.287951 |

|   |           |           |           |
|---|-----------|-----------|-----------|
| 1 | -1.023783 | 1.550085  | -0.950689 |
| 6 | 3.653431  | -1.078754 | -0.026445 |
| 1 | 4.570418  | -0.517756 | 0.169297  |
| 1 | 3.908715  | -2.143613 | -0.106244 |
| 1 | 3.244785  | -0.744145 | -0.991493 |
| 8 | 2.760229  | -0.828357 | 1.036805  |
| 1 | 1.896030  | -1.184751 | 0.773332  |
| 6 | -2.645933 | -2.155098 | 0.735318  |
| 1 | -2.182857 | -3.118603 | 0.509535  |
| 1 | -2.196270 | -1.752606 | 1.649903  |
| 1 | -3.719175 | -2.317710 | 0.889960  |
| 8 | -2.402136 | -1.304974 | -0.374675 |
| 1 | -2.763561 | -0.424127 | -0.190739 |

-----  
Cartesian coordinates of : BL6\_1

-----  
Atomic number (AN) and Cartesian coordinates

| AN | X         | Y         | Z         |
|----|-----------|-----------|-----------|
| 8  | 1.772518  | -2.024313 | 0.049077  |
| 1  | 1.139371  | -1.831175 | -0.660445 |
| 8  | -0.307045 | -0.798518 | -1.324539 |
| 1  | 0.078318  | 0.029611  | -0.966238 |
| 8  | 0.677306  | 1.291207  | 0.113293  |
| 1  | 1.581651  | 1.616422  | -0.061693 |
| 6  | 1.092743  | -2.759277 | 1.052448  |
| 1  | 0.897723  | -3.790429 | 0.733171  |
| 1  | 1.740560  | -2.788845 | 1.932066  |
| 1  | 0.140030  | -2.291227 | 1.330197  |
| 6  | -1.077671 | -0.518130 | -2.489854 |
| 1  | -1.815924 | 0.262792  | -2.281776 |
| 1  | -0.433237 | -0.209519 | -3.319946 |
| 1  | -1.588839 | -1.441543 | -2.768715 |
| 6  | 0.643457  | 0.760888  | 1.442567  |
| 1  | 1.425825  | 0.006563  | 1.571708  |
| 1  | 0.770198  | 1.563408  | 2.176038  |
| 1  | -0.333889 | 0.289912  | 1.579060  |
| 8  | 3.353577  | 1.703972  | -0.042463 |
| 1  | 3.949001  | 2.432862  | -0.241461 |
| 6  | 4.000711  | 0.450491  | -0.276473 |
| 1  | 4.331584  | 0.367295  | -1.316550 |
| 1  | 4.857320  | 0.327014  | 0.393314  |
| 1  | 3.267681  | -0.332962 | -0.071956 |
| 6  | -3.417068 | -1.052737 | 0.344119  |
| 1  | -4.086225 | -0.958134 | 1.203015  |
| 1  | -3.558437 | -0.183549 | -0.311056 |
| 1  | -3.690350 | -1.964375 | -0.203841 |
| 8  | -2.093785 | -1.116254 | 0.837634  |
| 1  | -1.487952 | -1.083862 | 0.076250  |
| 6  | -2.668314 | 2.145469  | 0.758107  |
| 1  | -3.734270 | 2.264124  | 0.549140  |
| 1  | -2.541617 | 1.328431  | 1.480506  |
| 1  | -2.300586 | 3.081340  | 1.197622  |
| 8  | -2.025554 | 1.854264  | -0.468599 |
| 1  | -1.067210 | 1.862763  | -0.319116 |

-----  
Cartesian coordinates of : BC6\_7

-----  
Atomic number (AN) and Cartesian coordinates

| AN | X        | Y         | Z        |
|----|----------|-----------|----------|
| 8  | 3.240376 | -1.263477 | 0.034886 |

|   |           |           |           |
|---|-----------|-----------|-----------|
| 1 | 3.078559  | -0.333330 | -0.212096 |
| 8 | 2.582717  | 1.402583  | -0.322518 |
| 1 | 1.807677  | 1.425716  | -0.913772 |
| 8 | 0.080724  | 1.047452  | -1.328289 |
| 1 | -0.077397 | 0.122353  | -1.048881 |
| 6 | 4.622636  | -1.443975 | 0.247981  |
| 1 | 5.004384  | -0.792198 | 1.045377  |
| 1 | 4.778475  | -2.481959 | 0.550889  |
| 1 | 5.206369  | -1.258497 | -0.662664 |
| 6 | 2.121843  | 1.683187  | 0.986408  |
| 1 | 1.727008  | 2.703034  | 1.061982  |
| 1 | 1.344651  | 0.972580  | 1.300253  |
| 1 | 2.972161  | 1.583788  | 1.664392  |
| 6 | -1.008528 | 1.481996  | -2.123144 |
| 1 | -1.065528 | 0.923804  | -3.064031 |
| 1 | -1.957684 | 1.371174  | -1.583987 |
| 1 | -0.850266 | 2.538062  | -2.351726 |
| 8 | -0.610338 | -1.272886 | -0.120820 |
| 1 | -1.565474 | -1.447110 | -0.238204 |
| 6 | 0.131996  | -2.484709 | 0.008959  |
| 1 | -0.190343 | -3.037410 | 0.897615  |
| 1 | 0.002378  | -3.114801 | -0.877058 |
| 1 | 1.184968  | -2.216839 | 0.108289  |
| 6 | -4.412928 | -1.552374 | 0.375561  |
| 1 | -5.315186 | -0.932187 | 0.338510  |
| 1 | -4.206244 | -1.821898 | 1.417836  |
| 1 | -4.596292 | -2.464499 | -0.194635 |
| 8 | -3.311139 | -0.892780 | -0.222560 |
| 1 | -3.084534 | -0.091214 | 0.284878  |
| 6 | -1.483912 | 2.326933  | 1.226935  |
| 1 | -0.923036 | 2.651465  | 0.343909  |
| 1 | -0.890194 | 2.527876  | 2.126152  |
| 1 | -2.417181 | 2.888836  | 1.292722  |
| 8 | -1.826572 | 0.953700  | 1.139003  |
| 1 | -1.040068 | 0.420164  | 0.940441  |

-----  
 Cartesian coordinates of : P6

-----  
 Atomic number (AN) and Cartesian coordinates

| AN | X         | Y         | Z         |
|----|-----------|-----------|-----------|
| 8  | 2.478124  | -1.110280 | 0.678387  |
| 1  | 1.624178  | -1.045102 | 1.139878  |
| 8  | -0.016862 | -0.424951 | 1.684352  |
| 1  | -0.037747 | 0.492218  | 1.353571  |
| 8  | -0.035687 | 1.893493  | 0.161411  |
| 1  | 0.252040  | 1.370172  | -0.634301 |
| 6  | 3.030729  | 0.185030  | 0.623952  |
| 1  | 3.086136  | 0.651956  | 1.616372  |
| 1  | 4.044978  | 0.098767  | 0.226435  |
| 1  | 2.455036  | 0.846765  | -0.040273 |
| 6  | -0.882166 | -0.568716 | 2.801162  |
| 1  | -0.557395 | 0.054124  | 3.642155  |
| 1  | -1.911393 | -0.313537 | 2.527518  |
| 1  | -0.840117 | -1.615406 | 3.108624  |
| 6  | 0.595746  | 3.161530  | 0.194863  |
| 1  | 1.677640  | 3.062173  | 0.341870  |
| 1  | 0.408124  | 3.719826  | -0.728215 |
| 1  | 0.178705  | 3.719988  | 1.034618  |
| 8  | 0.406164  | 0.254973  | -1.842159 |
| 1  | -0.169136 | -0.498415 | -1.565214 |
| 6  | 1.598151  | -0.257185 | -2.424597 |
| 1  | 2.128679  | -0.911628 | -1.724169 |
| 1  | 1.370028  | -0.802702 | -3.346613 |



|   |           |           |           |
|---|-----------|-----------|-----------|
| 1 | 2.235531  | 0.593657  | -2.676187 |
| 6 | -0.407017 | -2.792582 | -0.350552 |
| 1 | -0.891862 | -3.268229 | 0.508247  |
| 1 | 0.615315  | -2.510117 | -0.078421 |
| 1 | -0.374216 | -3.509780 | -1.173251 |
| 8 | -1.155713 | -1.671679 | -0.802283 |
| 1 | -1.400477 | -1.104193 | -0.047747 |
| 6 | -3.203847 | 0.601074  | -0.972933 |
| 1 | -2.545840 | 0.613043  | -1.849930 |
| 1 | -3.860502 | 1.478232  | -0.997119 |
| 1 | -3.815791 | -0.301112 | -1.014093 |
| 8 | -2.457385 | 0.549614  | 0.234271  |
| 1 | -1.810635 | 1.275035  | 0.233040  |

-----  
Cartesian coordinates of : DC6

-----  
Atomic number (AN) and Cartesian coordinates

| AN | X         | Y         | Z         |
|----|-----------|-----------|-----------|
| 8  | -2.579296 | 0.569604  | -0.481492 |
| 1  | -2.324794 | 1.026423  | 0.346424  |
| 8  | -1.329657 | 1.454534  | 1.769109  |
| 1  | -0.572938 | 1.593471  | 1.163443  |
| 8  | 0.373144  | 1.322045  | -0.336236 |
| 1  | 1.336417  | 1.127377  | -0.363282 |
| 6  | -3.944481 | 0.208651  | -0.423336 |
| 1  | -4.591483 | 1.090174  | -0.345702 |
| 1  | -4.188912 | -0.317883 | -1.348497 |
| 1  | -4.154430 | -0.459251 | 0.422798  |
| 6  | -1.157961 | 0.190652  | 2.388156  |
| 1  | -1.003154 | -0.602516 | 1.642822  |
| 1  | -0.309089 | 0.196147  | 3.082286  |
| 1  | -2.066148 | -0.024846 | 2.955555  |
| 6  | 0.051990  | 2.084770  | -1.494968 |
| 1  | 0.504754  | 3.081385  | -1.450127 |
| 1  | 0.399582  | 1.573331  | -2.398904 |
| 1  | -1.034528 | 2.176037  | -1.536596 |
| 8  | 2.941871  | 0.601734  | -0.718051 |
| 1  | 2.771877  | -0.366949 | -0.682894 |
| 6  | 4.098643  | 0.914471  | 0.034837  |
| 1  | 4.225576  | 1.998373  | 0.013171  |
| 1  | 4.002572  | 0.593836  | 1.080036  |
| 1  | 4.990270  | 0.449501  | -0.399539 |
| 8  | 2.001824  | -1.857239 | -0.213752 |
| 1  | 1.105316  | -1.758404 | -0.602043 |
| 6  | 1.852903  | -1.735188 | 1.189475  |
| 1  | 1.609719  | -0.702323 | 1.478307  |
| 1  | 1.063554  | -2.396230 | 1.564955  |
| 1  | 2.799964  | -2.020151 | 1.653533  |
| 6  | -1.666952 | -2.280365 | -0.959297 |
| 1  | -1.274363 | -3.293365 | -1.068699 |
| 1  | -2.275810 | -2.230082 | -0.048052 |
| 1  | -2.302049 | -2.051600 | -1.822198 |
| 8  | -0.561800 | -1.402027 | -0.889803 |
| 1  | -0.885439 | -0.489618 | -0.784200 |

-----  
Cartesian coordinates of : BC6\_1

-----  
Atomic number (AN) and Cartesian coordinates

| AN | X         | Y        | Z         |
|----|-----------|----------|-----------|
| 1  | -0.540521 | 0.180533 | -1.504823 |

|   |           |           |           |
|---|-----------|-----------|-----------|
| 6 | 0.137319  | -0.150841 | -2.304928 |
| 1 | -0.220913 | -1.113311 | -2.694123 |
| 1 | 0.097609  | 0.581522  | -3.114875 |
| 8 | 1.477663  | -0.229669 | -1.864242 |
| 1 | 1.507515  | -0.901248 | -1.163469 |
| 1 | 3.142433  | 0.738995  | -0.320022 |
| 6 | 3.170359  | 0.857885  | 0.768846  |
| 1 | 3.918493  | 0.180676  | 1.196128  |
| 1 | 3.456550  | 1.883529  | 1.011356  |
| 8 | 1.891371  | 0.628345  | 1.345305  |
| 1 | 1.584453  | -0.267627 | 1.098008  |
| 1 | 1.206680  | 2.116351  | -1.322993 |
| 6 | 0.561777  | 2.829801  | -0.798228 |
| 1 | 1.136498  | 3.725209  | -0.535603 |
| 1 | -0.257282 | 3.123751  | -1.459844 |
| 8 | -0.004712 | 2.241928  | 0.365056  |
| 1 | 0.685248  | 1.693078  | 0.808918  |
| 1 | 0.979353  | -3.867347 | 0.398844  |
| 6 | 1.324513  | -3.019279 | 1.000264  |
| 1 | 0.916481  | -3.107528 | 2.012484  |
| 1 | 2.414641  | -3.049816 | 1.053804  |
| 8 | 0.949705  | -1.786868 | 0.405168  |
| 1 | -0.048334 | -1.712768 | 0.397141  |
| 1 | -3.476197 | 2.550844  | 0.823648  |
| 6 | -3.190606 | 1.554078  | 1.175840  |
| 1 | -2.767690 | 1.638819  | 2.183011  |
| 1 | -4.085104 | 0.929135  | 1.219616  |
| 8 | -2.277147 | 0.945343  | 0.278830  |
| 1 | -1.428380 | 1.464658  | 0.274411  |
| 1 | -2.507181 | -1.478402 | -1.506883 |
| 6 | -2.330018 | -2.195810 | -0.698235 |
| 1 | -3.290367 | -2.602359 | -0.363504 |
| 1 | -1.717611 | -3.015955 | -1.084183 |
| 8 | -1.640173 | -1.587912 | 0.381137  |
| 1 | -1.920078 | -0.635091 | 0.441566  |

-----  
Cartesian coordinates of : L6

-----  
Atomic number (AN) and Cartesian coordinates

| AN | X         | Y         | Z         |
|----|-----------|-----------|-----------|
| 8  | 2.967024  | 0.795367  | -0.794459 |
| 1  | 2.398512  | 0.752851  | -0.003395 |
| 8  | 1.356568  | 0.084048  | 1.350433  |
| 1  | 0.919226  | -0.709078 | 0.950993  |
| 8  | 0.185520  | -1.874993 | 0.009270  |
| 1  | -0.758596 | -1.625093 | -0.136336 |
| 6  | 4.034818  | -0.101250 | -0.584777 |
| 1  | 3.678202  | -1.116338 | -0.355980 |
| 1  | 4.622537  | -0.142573 | -1.504641 |
| 1  | 4.693885  | 0.226388  | 0.230483  |
| 6  | 1.920074  | -0.250532 | 2.603466  |
| 1  | 1.146663  | -0.541233 | 3.324663  |
| 1  | 2.646361  | -1.068001 | 2.516151  |
| 1  | 2.434950  | 0.633965  | 2.984672  |
| 6  | 0.831197  | -1.963660 | -1.254974 |
| 1  | 0.096746  | -2.113620 | -2.053143 |
| 1  | 1.409059  | -1.053452 | -1.464982 |
| 1  | 1.512236  | -2.819009 | -1.240287 |
| 8  | -2.303759 | -1.133021 | -0.531153 |
| 1  | -2.479310 | -0.215672 | -0.206356 |
| 6  | -3.391440 | -1.971240 | -0.181557 |
| 1  | -3.146609 | -2.985851 | -0.501854 |
| 1  | -3.564048 | -1.977278 | 0.901102  |

|   |           |           |           |
|---|-----------|-----------|-----------|
| 1 | -4.309190 | -1.653629 | -0.687610 |
| 8 | -2.644141 | 1.318984  | 0.448114  |
| 1 | -2.213327 | 1.921390  | -0.188939 |
| 6 | -1.961655 | 1.411593  | 1.694874  |
| 1 | -0.893769 | 1.183594  | 1.591479  |
| 1 | -2.081300 | 2.409252  | 2.128956  |
| 1 | -2.417796 | 0.681382  | 2.366989  |
| 8 | -0.930727 | 2.486015  | -1.307723 |
| 1 | -1.035285 | 2.956081  | -2.140858 |
| 6 | -0.104127 | 1.333711  | -1.501154 |
| 1 | -0.595709 | 0.599014  | -2.148991 |
| 1 | 0.876916  | 1.604299  | -1.899748 |
| 1 | 0.042561  | 0.889686  | -0.513497 |

-----  
Cartesian coordinates of : CY6\_7

-----  
Atomic number (AN) and Cartesian coordinates

| AN | X         | Y         | Z         |
|----|-----------|-----------|-----------|
| 1  | -2.454578 | -2.926885 | 1.402405  |
| 6  | -2.810672 | -2.565415 | 0.430965  |
| 1  | -2.697427 | -3.364807 | -0.309288 |
| 1  | -3.870766 | -2.315961 | 0.515938  |
| 8  | -2.120875 | -1.396934 | 0.025089  |
| 1  | -1.160365 | -1.612148 | -0.087466 |
| 1  | -4.506392 | 1.111429  | 1.182406  |
| 6  | -3.677262 | 1.489617  | 0.573410  |
| 1  | -3.831233 | 1.180141  | -0.468098 |
| 1  | -3.681341 | 2.580967  | 0.621306  |
| 8  | -2.431132 | 1.035002  | 1.069650  |
| 1  | -2.330869 | 0.084927  | 0.825445  |
| 1  | -1.667435 | 2.272300  | -2.015691 |
| 6  | -0.904409 | 1.581746  | -1.637506 |
| 1  | -1.331708 | 0.572877  | -1.575860 |
| 1  | -0.066023 | 1.570994  | -2.338933 |
| 8  | -0.415473 | 2.009808  | -0.376316 |
| 1  | -1.089590 | 1.759108  | 0.299175  |
| 1  | 1.667414  | -2.272304 | -2.015691 |
| 6  | 0.904389  | -1.581758 | -1.637490 |
| 1  | 1.331679  | -0.572885 | -1.575850 |
| 1  | 0.065990  | -1.571012 | -2.338902 |
| 8  | 0.415481  | -2.009828 | -0.376292 |
| 1  | 1.089602  | -1.759113 | 0.299190  |
| 1  | 2.454533  | 2.926891  | 1.402401  |
| 6  | 2.810662  | 2.565426  | 0.430973  |
| 1  | 2.697434  | 3.364817  | -0.309283 |
| 1  | 3.870755  | 2.315980  | 0.515980  |
| 8  | 2.120888  | 1.396939  | 0.025073  |
| 1  | 1.160377  | 1.612142  | -0.087496 |
| 1  | 4.506406  | -1.111396 | 1.182362  |
| 6  | 3.677266  | -1.489614 | 0.573398  |
| 1  | 3.831214  | -1.180177 | -0.468125 |
| 1  | 3.681353  | -2.580962 | 0.621337  |
| 8  | 2.431143  | -1.034989 | 1.069646  |
| 1  | 2.330877  | -0.084917 | 0.825427  |

-----  
Cartesian coordinates of : CY6\_1

-----  
Atomic number (AN) and Cartesian coordinates

| AN | X        | Y        | Z         |
|----|----------|----------|-----------|
| 1  | 2.757030 | 1.336568 | -2.064972 |

|   |           |           |           |
|---|-----------|-----------|-----------|
| 6 | 3.028393  | 1.856271  | -1.139191 |
| 1 | 4.077388  | 1.641881  | -0.905957 |
| 1 | 2.917790  | 2.932046  | -1.294021 |
| 8 | 2.183505  | 1.482581  | -0.065989 |
| 1 | 2.212529  | 0.497303  | 0.031589  |
| 1 | 0.610091  | 4.347360  | 0.917040  |
| 6 | -0.097705 | 3.542074  | 1.143398  |
| 1 | 0.216933  | 3.041519  | 2.066016  |
| 1 | -1.086396 | 3.979685  | 1.299980  |
| 8 | -0.191862 | 2.630942  | 0.063409  |
| 1 | 0.676583  | 2.164612  | -0.033797 |
| 1 | -2.538598 | 1.710434  | -2.067839 |
| 6 | -3.121649 | 1.691331  | -1.140236 |
| 1 | -3.456673 | 2.708997  | -0.910358 |
| 1 | -4.000377 | 1.059713  | -1.289860 |
| 8 | -2.374121 | 1.148781  | -0.066908 |
| 1 | -1.534841 | 1.666330  | 0.028121  |
| 1 | 3.456673  | -2.708998 | 0.910357  |
| 6 | 3.121649  | -1.691331 | 1.140236  |
| 1 | 2.538598  | -1.710435 | 2.067838  |
| 1 | 4.000378  | -1.059713 | 1.289859  |
| 8 | 2.374121  | -1.148781 | 0.066907  |
| 1 | 1.534841  | -1.666330 | -0.028121 |
| 1 | -4.077388 | -1.641881 | 0.905958  |
| 6 | -3.028393 | -1.856271 | 1.139191  |
| 1 | -2.757029 | -1.336568 | 2.064972  |
| 1 | -2.917790 | -2.932046 | 1.294021  |
| 8 | -2.183505 | -1.482581 | 0.065990  |
| 1 | -2.212529 | -0.497303 | -0.031589 |
| 1 | -0.216934 | -3.041519 | -2.066017 |
| 6 | 0.097705  | -3.542074 | -1.143399 |
| 1 | -0.610091 | -4.347360 | -0.917040 |
| 1 | 1.086396  | -3.979684 | -1.299981 |
| 8 | 0.191862  | -2.630942 | -0.063409 |
| 1 | -0.676583 | -2.164612 | 0.033797  |

-----  
 Cartesian coordinates of : CY6\_4

-----  
 Atomic number (AN) and Cartesian coordinates

| AN | X         | Y         | Z         |
|----|-----------|-----------|-----------|
| 1  | 0.122004  | 0.087798  | 1.406482  |
| 6  | 0.303947  | -0.908208 | 1.830585  |
| 1  | 0.915714  | -0.804655 | 2.731879  |
| 1  | -0.656215 | -1.353453 | 2.104070  |
| 8  | 0.926644  | -1.775124 | 0.891982  |
| 1  | 1.797315  | -1.376553 | 0.667607  |
| 1  | -1.941292 | -3.417213 | 0.295062  |
| 6  | -1.682130 | -3.223660 | -0.753532 |
| 1  | -1.086204 | -4.061391 | -1.131055 |
| 1  | -2.602965 | -3.160646 | -1.337729 |
| 8  | -0.989069 | -1.997658 | -0.901785 |
| 1  | -0.191470 | -1.996303 | -0.314113 |
| 1  | -2.970736 | -0.840909 | 1.286173  |
| 6  | -3.370086 | -0.196983 | 0.492890  |
| 1  | -4.143646 | -0.745092 | -0.056967 |
| 1  | -3.827554 | 0.680315  | 0.955918  |
| 8  | -2.346461 | 0.251312  | -0.377314 |
| 1  | -1.835209 | -0.537983 | -0.676698 |
| 1  | 4.921750  | 0.543467  | -0.009232 |
| 6  | 4.261381  | -0.309786 | -0.198707 |
| 1  | 4.093332  | -0.396568 | -1.279358 |
| 1  | 4.756209  | -1.217666 | 0.151404  |
| 8  | 3.044615  | -0.180170 | 0.511381  |

|   |           |           |           |
|---|-----------|-----------|-----------|
| 1 | 2.558770  | 0.616985  | 0.194134  |
| 1 | -2.475988 | 3.609613  | 0.517203  |
| 6 | -1.463325 | 3.472348  | 0.121317  |
| 1 | -1.505262 | 3.494304  | -0.974631 |
| 1 | -0.839723 | 4.299339  | 0.465938  |
| 8 | -0.887111 | 2.268046  | 0.596994  |
| 1 | -1.423336 | 1.510468  | 0.261068  |
| 1 | 0.055088  | 1.505220  | -2.078343 |
| 6 | 0.879752  | 0.949014  | -1.618905 |
| 1 | 0.497957  | -0.016539 | -1.263056 |
| 1 | 1.644242  | 0.765069  | -2.376888 |
| 8 | 1.478369  | 1.697009  | -0.569343 |
| 1 | 0.744089  | 2.008724  | 0.003929  |

-----

Cartesian coordinates of : CY6\_3

-----

Atomic number (AN) and Cartesian coordinates

| AN | X         | Y         | Z         |
|----|-----------|-----------|-----------|
| 1  | -0.059720 | -0.041448 | 1.144064  |
| 6  | -0.115492 | -1.019881 | 1.642408  |
| 1  | 0.780786  | -1.154701 | 2.258066  |
| 1  | -0.993134 | -1.036959 | 2.293846  |
| 8  | -0.246848 | -2.077910 | 0.706865  |
| 1  | 0.626297  | -2.170172 | 0.258834  |
| 1  | -3.541839 | -1.875602 | 0.834306  |
| 6  | -3.474669 | -1.951893 | -0.258596 |
| 1  | -3.500550 | -3.009837 | -0.540805 |
| 1  | -4.340721 | -1.452600 | -0.699042 |
| 8  | -2.309644 | -1.320364 | -0.755610 |
| 1  | -1.515366 | -1.694218 | -0.297254 |
| 1  | -2.637330 | 0.815473  | 1.451327  |
| 6  | -2.881103 | 1.545147  | 0.668933  |
| 1  | -3.956992 | 1.502816  | 0.464335  |
| 1  | -2.633911 | 2.543984  | 1.036203  |
| 8  | -2.129473 | 1.312367  | -0.508390 |
| 1  | -2.203045 | 0.351004  | -0.729973 |
| 1  | 3.895590  | -2.137347 | -1.452156 |
| 6  | 2.822160  | -2.353893 | -1.418599 |
| 1  | 2.343762  | -1.919056 | -2.304146 |
| 1  | 2.685020  | -3.436770 | -1.441938 |
| 8  | 2.243241  | -1.870504 | -0.221148 |
| 1  | 2.364497  | -0.891573 | -0.162722 |
| 1  | -0.281373 | 4.200423  | -0.747964 |
| 6  | 0.416738  | 3.425313  | -1.083568 |
| 1  | 0.216033  | 3.196682  | -2.136006 |
| 1  | 1.435192  | 3.810672  | -0.995596 |
| 8  | 0.319444  | 2.268092  | -0.272541 |
| 1  | -0.580039 | 1.868291  | -0.383613 |
| 1  | 2.113441  | 1.180914  | 2.060889  |
| 6  | 2.932002  | 1.167142  | 1.331428  |
| 1  | 3.384419  | 2.164390  | 1.289725  |
| 1  | 3.688211  | 0.451699  | 1.662655  |
| 8  | 2.478533  | 0.760671  | 0.052575  |
| 1  | 1.670929  | 1.283503  | -0.169079 |

-----

Cartesian coordinates of : CY6\_2

-----

Atomic number (AN) and Cartesian coordinates

| AN | X        | Y         | Z        |
|----|----------|-----------|----------|
| 1  | 2.466004 | -0.087970 | 2.224487 |

|   |           |           |           |
|---|-----------|-----------|-----------|
| 6 | 3.097788  | -0.435301 | 1.398702  |
| 1 | 4.043584  | 0.117641  | 1.417220  |
| 1 | 3.309470  | -1.497946 | 1.539082  |
| 8 | 2.443026  | -0.280104 | 0.150329  |
| 1 | 2.022668  | 0.613351  | 0.135524  |
| 1 | 2.114269  | -3.208596 | -1.746478 |
| 6 | 1.074464  | -2.879488 | -1.642562 |
| 1 | 0.855786  | -2.147914 | -2.431661 |
| 1 | 0.420046  | -3.742943 | -1.776886 |
| 8 | 0.832413  | -2.347631 | -0.354836 |
| 1 | 1.436064  | -1.582244 | -0.196726 |
| 1 | -0.081094 | 0.062277  | 1.244610  |
| 6 | -0.622648 | -0.699321 | 1.821575  |
| 1 | 0.096572  | -1.276705 | 2.413312  |
| 1 | -1.314644 | -0.196547 | 2.500860  |
| 8 | -1.384651 | -1.552539 | 0.980401  |
| 1 | -0.743173 | -2.021216 | 0.406607  |
| 1 | 1.388191  | 4.154078  | 0.142897  |
| 6 | 1.880532  | 3.235196  | -0.192102 |
| 1 | 1.888882  | 3.214663  | -1.288365 |
| 1 | 2.911723  | 3.239359  | 0.167480  |
| 8 | 1.238221  | 2.090727  | 0.344078  |
| 1 | 0.338080  | 2.010846  | -0.058932 |
| 1 | -3.952819 | 0.676314  | 1.630945  |
| 6 | -4.202011 | 0.429452  | 0.591484  |
| 1 | -4.864890 | -0.442670 | 0.583021  |
| 1 | -4.733187 | 1.274820  | 0.150057  |
| 8 | -3.042089 | 0.196664  | -0.183867 |
| 1 | -2.529265 | -0.553206 | 0.197739  |
| 1 | -1.101301 | 0.434629  | -2.753197 |
| 6 | -0.466296 | 0.566780  | -1.871280 |
| 1 | -0.421979 | -0.376848 | -1.312564 |
| 1 | 0.545195  | 0.827135  | -2.196702 |
| 8 | -0.944995 | 1.627336  | -1.055064 |
| 1 | -1.800551 | 1.330165  | -0.675571 |

-----  
Cartesian coordinates of : CY6\_6

-----  
Atomic number (AN) and Cartesian coordinates

| AN | X         | Y         | Z         |
|----|-----------|-----------|-----------|
| 1  | -4.059121 | -1.079280 | 0.891530  |
| 6  | -2.975263 | -1.200335 | 0.999968  |
| 1  | -2.592510 | -0.412847 | 1.661446  |
| 1  | -2.776160 | -2.169768 | 1.462674  |
| 8  | -2.331456 | -1.176740 | -0.260703 |
| 1  | -2.363651 | -0.249344 | -0.601939 |
| 1  | -0.334900 | -3.406385 | -1.892418 |
| 6  | -0.033619 | -3.552140 | -0.849432 |
| 1  | -0.744380 | -4.230076 | -0.363742 |
| 1  | 0.957261  | -4.011954 | -0.831112 |
| 8  | 0.048039  | -2.319462 | -0.155174 |
| 1  | -0.823153 | -1.853455 | -0.220796 |
| 1  | 2.976740  | -2.404112 | 1.157201  |
| 6  | 2.918036  | -1.324518 | 0.980190  |
| 1  | 2.324845  | -0.870065 | 1.784317  |
| 1  | 3.929122  | -0.911417 | 1.009823  |
| 8  | 2.371157  | -1.046730 | -0.295411 |
| 1  | 1.482286  | -1.474899 | -0.343070 |
| 1  | -3.360090 | 3.227198  | -0.733496 |
| 6  | -3.383689 | 2.219017  | -0.306346 |
| 1  | -3.307802 | 2.295436  | 0.786067  |
| 1  | -4.339696 | 1.755512  | -0.559990 |
| 8  | -2.353864 | 1.412620  | -0.846649 |

|   |           |          |           |
|---|-----------|----------|-----------|
| 1 | -1.477572 | 1.765979 | -0.556732 |
| 1 | 4.360007  | 1.764474 | -0.747785 |
| 6 | 3.446194  | 2.137596 | -0.271898 |
| 1 | 3.494081  | 1.926197 | 0.805035  |
| 1 | 3.397510  | 3.219173 | -0.411269 |
| 8 | 2.294127  | 1.571139 | -0.866652 |
| 1 | 2.332245  | 0.591452 | -0.758573 |
| 1 | 0.987751  | 1.355762 | 1.876544  |
| 6 | 0.054192  | 1.208244 | 1.320496  |
| 1 | 0.015981  | 0.170029 | 0.961368  |
| 1 | -0.783651 | 1.377588 | 2.001952  |
| 8 | -0.055640 | 2.138527 | 0.257245  |
| 1 | 0.770845  | 2.062791 | -0.276151 |

-----  
Cartesian coordinates of : BC6\_3

-----  
Atomic number (AN) and Cartesian coordinates

| AN | X         | Y         | Z         |
|----|-----------|-----------|-----------|
| 8  | -1.969679 | -0.391974 | -0.684136 |
| 6  | -3.202995 | -0.426264 | -1.385421 |
| 1  | -3.939074 | 0.235389  | -0.915637 |
| 1  | -3.070837 | -0.130877 | -2.431475 |
| 1  | -3.581079 | -1.449841 | -1.351717 |
| 1  | -1.612409 | 0.545534  | -0.670511 |
| 8  | 1.555125  | 1.798855  | -0.026369 |
| 6  | 2.334655  | 2.689831  | -0.809154 |
| 1  | 3.373771  | 2.704146  | -0.463920 |
| 1  | 2.312009  | 2.415726  | -1.869394 |
| 1  | 1.913250  | 3.690543  | -0.693634 |
| 1  | 1.865434  | 0.874933  | -0.195353 |
| 8  | 2.350372  | -0.673152 | -0.623947 |
| 6  | 3.096719  | -1.412162 | 0.327640  |
| 1  | 2.474652  | -1.715567 | 1.179353  |
| 1  | 3.540092  | -2.303764 | -0.129113 |
| 1  | 3.900795  | -0.770595 | 0.693723  |
| 1  | 1.565542  | -1.208183 | -0.887380 |
| 8  | 0.111669  | -2.117140 | -1.028962 |
| 6  | -0.127493 | -3.158126 | -0.090953 |
| 1  | -0.406871 | -2.759528 | 0.891660  |
| 1  | -0.920506 | -3.826152 | -0.444869 |
| 1  | 0.794364  | -3.736831 | 0.001682  |
| 1  | -0.663977 | -1.516966 | -1.031825 |
| 8  | -1.413535 | -0.720169 | 2.070862  |
| 6  | -0.089775 | -0.235613 | 1.975635  |
| 1  | 0.387455  | -0.532206 | 1.031036  |
| 1  | -0.036996 | 0.858403  | 2.052042  |
| 1  | 0.483611  | -0.662331 | 2.803430  |
| 1  | -1.822737 | -0.652750 | 1.193122  |
| 8  | -1.035444 | 1.998949  | -0.423961 |
| 6  | -1.650359 | 2.622052  | 0.696492  |
| 1  | -1.995102 | 1.876016  | 1.424120  |
| 1  | -0.950610 | 3.301947  | 1.192504  |
| 1  | -2.507601 | 3.198456  | 0.340696  |
| 1  | -0.055765 | 1.923237  | -0.271857 |

-----  
Cartesian coordinates of : BC6\_2

-----  
Atomic number (AN) and Cartesian coordinates

| AN | X        | Y         | Z        |
|----|----------|-----------|----------|
| 8  | 0.928610 | -2.207976 | 0.270174 |

|   |           |           |           |
|---|-----------|-----------|-----------|
| 6 | 1.049353  | -2.002015 | 1.671121  |
| 1 | 0.453033  | -1.140626 | 1.999076  |
| 1 | 0.725869  | -2.890443 | 2.222159  |
| 1 | 2.103056  | -1.813181 | 1.892834  |
| 1 | -0.044698 | -2.210241 | 0.066164  |
| 8 | -0.636107 | 0.854943  | -1.644416 |
| 6 | -0.509879 | 2.246557  | -1.867652 |
| 1 | -0.102853 | 2.759484  | -0.987407 |
| 1 | 0.124204  | 2.463631  | -2.736822 |
| 1 | -1.509969 | 2.637244  | -2.072602 |
| 1 | 0.251821  | 0.482558  | -1.510511 |
| 8 | -1.665408 | -1.890801 | 0.101750  |
| 6 | -2.429437 | -1.831961 | -1.095420 |
| 1 | -3.496581 | -1.729736 | -0.865649 |
| 1 | -2.106388 | -0.998695 | -1.727704 |
| 1 | -2.282038 | -2.774521 | -1.626997 |
| 1 | -1.710017 | -1.017201 | 0.558676  |
| 8 | 0.891488  | 1.551745  | 0.964381  |
| 6 | 1.572006  | 1.737183  | 2.192419  |
| 1 | 1.975245  | 0.794018  | 2.579591  |
| 1 | 2.388990  | 2.459824  | 2.087710  |
| 1 | 0.849085  | 2.125940  | 2.912153  |
| 1 | 1.451609  | 1.058666  | 0.332830  |
| 8 | -1.630806 | 0.526992  | 1.294875  |
| 6 | -2.654729 | 1.344316  | 0.750388  |
| 1 | -2.508491 | 2.394816  | 1.026708  |
| 1 | -2.683810 | 1.260274  | -0.342034 |
| 1 | -3.604263 | 1.003630  | 1.169086  |
| 1 | -0.758841 | 0.900931  | 1.047763  |
| 8 | 1.915013  | -0.138086 | -0.895191 |
| 6 | 3.045665  | -0.352578 | -1.722093 |
| 1 | 3.883326  | -0.764273 | -1.148622 |
| 1 | 2.807461  | -1.034540 | -2.545097 |
| 1 | 3.345293  | 0.610833  | -2.139462 |
| 1 | 1.588764  | -1.001927 | -0.497006 |

-----  
Cartesian coordinates of : CY6\_5

-----  
Atomic number (AN) and Cartesian coordinates

| AN | X         | Y         | Z         |
|----|-----------|-----------|-----------|
| 8  | -2.370519 | -1.280094 | -0.352110 |
| 6  | -2.633172 | -2.340328 | 0.547362  |
| 1  | -2.881698 | -3.261306 | 0.008992  |
| 1  | -1.777143 | -2.532651 | 1.206692  |
| 1  | -3.488307 | -2.052538 | 1.162347  |
| 1  | -1.525832 | -1.447809 | -0.833409 |
| 8  | -2.371536 | 1.273696  | 0.442529  |
| 6  | -2.972707 | 2.091788  | -0.542236 |
| 1  | -2.413251 | 2.067865  | -1.486205 |
| 1  | -4.005516 | 1.783005  | -0.735982 |
| 1  | -2.980079 | 3.116704  | -0.166104 |
| 1  | -2.427725 | 0.328453  | 0.166096  |
| 8  | 2.370484  | 1.280103  | 0.352096  |
| 6  | 2.633079  | 2.340378  | -0.547344 |
| 1  | 1.777040  | 2.532671  | -1.206672 |
| 1  | 2.881550  | 3.261355  | -0.008947 |
| 1  | 3.488232  | 2.052657  | -1.162335 |
| 1  | 1.525808  | 1.447780  | 0.833427  |
| 8  | 0.035760  | 1.302118  | 1.631170  |
| 6  | -0.025938 | -0.083113 | 1.935275  |
| 1  | -0.955073 | -0.325613 | 2.463113  |
| 1  | 0.039880  | -0.697865 | 1.025236  |
| 1  | 0.821192  | -0.318121 | 2.584180  |



|   |           |           |           |
|---|-----------|-----------|-----------|
| 1 | -0.808121 | 1.525142  | 1.181010  |
| 8 | 2.371551  | -1.273693 | -0.442536 |
| 6 | 2.972852  | -2.091753 | 0.542176  |
| 1 | 4.005760  | -1.783107 | 0.735614  |
| 1 | 2.413645  | -2.067625 | 1.486287  |
| 1 | 2.979967  | -3.116717 | 0.166170  |
| 1 | 2.427743  | -0.328444 | -0.166123 |
| 8 | -0.035770 | -1.302168 | -1.631132 |
| 6 | 0.025911  | 0.083062  | -1.935247 |
| 1 | -0.039862 | 0.697817  | -1.025207 |
| 1 | 0.955018  | 0.325561  | -2.463134 |
| 1 | -0.821254 | 0.318064  | -2.584108 |
| 1 | 0.808119  | -1.525182 | -1.180984 |

-----  
Cartesian coordinates of : BC6\_5

-----  
Atomic number (AN) and Cartesian coordinates

| AN | X         | Y         | Z         |
|----|-----------|-----------|-----------|
| 8  | -1.957487 | -0.968480 | 0.038103  |
| 6  | -2.847800 | -2.053915 | -0.172157 |
| 1  | -3.498670 | -1.866171 | -1.032315 |
| 1  | -2.299054 | -2.987649 | -0.333826 |
| 1  | -3.466245 | -2.155574 | 0.721152  |
| 1  | -1.338548 | -0.890462 | -0.734508 |
| 8  | 0.122726  | -0.890208 | 1.845408  |
| 6  | -0.010605 | -0.000758 | 2.949873  |
| 1  | -0.545271 | 0.908558  | 2.658504  |
| 1  | -0.534427 | -0.493716 | 3.775661  |
| 1  | 0.996563  | 0.261103  | 3.281398  |
| 1  | -0.720166 | -0.955167 | 1.353206  |
| 8  | 1.906685  | 1.716096  | -0.813524 |
| 6  | 1.588772  | 2.261993  | 0.453144  |
| 1  | 0.733365  | 1.751533  | 0.916170  |
| 1  | 2.445506  | 2.223563  | 1.138947  |
| 1  | 1.318396  | 3.309353  | 0.301545  |
| 1  | 2.183465  | 0.798822  | -0.663372 |
| 8  | -0.122842 | -0.890889 | -1.845129 |
| 6  | 0.010606  | -0.001811 | -2.949880 |
| 1  | 0.545372  | 0.907538  | -2.658801 |
| 1  | 0.534381  | -0.495097 | -3.775502 |
| 1  | -0.996527 | 0.260060  | -3.281502 |
| 1  | 0.720037  | -0.955782 | -1.352894 |
| 8  | -1.906525 | 1.716526  | 0.812945  |
| 6  | -1.588531 | 2.261984  | -0.453892 |
| 1  | -0.733190 | 1.751264  | -0.916753 |
| 1  | -2.445266 | 2.223454  | -1.139687 |
| 1  | -1.318013 | 3.309355  | -0.302621 |
| 1  | -2.183438 | 0.799245  | 0.663080  |
| 8  | 1.957346  | -0.968672 | -0.037806 |
| 6  | 2.847652  | -2.054029 | 0.172887  |
| 1  | 3.498569  | -1.865917 | 1.032928  |
| 1  | 2.298897  | -2.987682 | 0.334997  |
| 1  | 3.466049  | -2.156093 | -0.720408 |
| 1  | 1.338425  | -0.890317 | 0.734785  |

-----  
Cartesian coordinates of the methanol heptamer

Cartesian coordinates of : BC7\_8

-----  
Atomic number (AN) and Cartesian coordinates

| AN | X         | Y         | Z         |
|----|-----------|-----------|-----------|
| 8  | -1.514871 | 3.641780  | 0.025812  |
| 1  | -1.602230 | 2.730599  | -0.293793 |
| 8  | -1.631496 | 0.840618  | -0.084568 |
| 1  | -1.050888 | 0.125616  | -0.422323 |
| 8  | -0.144824 | -1.334120 | -0.783435 |
| 1  | 0.819837  | -1.187096 | -0.794325 |
| 6  | -0.259502 | 3.756504  | 0.652745  |
| 1  | 0.572031  | 3.625029  | -0.054086 |
| 1  | -0.191974 | 4.761267  | 1.075385  |
| 1  | -0.137538 | 3.031771  | 1.472262  |
| 6  | -1.849675 | 0.624616  | 1.305605  |
| 1  | -2.446970 | -0.281976 | 1.467445  |
| 1  | -0.900134 | 0.533028  | 1.846868  |
| 1  | -2.397376 | 1.490023  | 1.684850  |
| 6  | -0.578717 | -2.077431 | -1.926400 |
| 1  | -0.275155 | -1.575938 | -2.849838 |
| 1  | -0.161469 | -3.088467 | -1.905210 |
| 1  | -1.667254 | -2.119072 | -1.876375 |
| 8  | 2.302394  | -0.548909 | 0.214405  |
| 1  | 1.977647  | -1.001517 | 1.014147  |
| 6  | 2.003137  | 0.841064  | 0.323265  |
| 1  | 0.920653  | 1.009321  | 0.374767  |
| 1  | 2.478462  | 1.279664  | 1.206756  |
| 1  | 2.398368  | 1.322199  | -0.574023 |
| 6  | 5.395479  | 0.329991  | -0.861525 |
| 1  | 6.077886  | 0.835669  | -1.547615 |
| 1  | 4.980440  | 1.080699  | -0.173807 |
| 1  | 5.971401  | -0.397379 | -0.274833 |
| 8  | 4.393664  | -0.287889 | -1.638802 |
| 1  | 3.745443  | -0.676299 | -1.033635 |
| 6  | -4.912571 | -0.764966 | -1.338054 |
| 1  | -5.348083 | -1.743395 | -1.549448 |
| 1  | -5.443981 | -0.327668 | -0.483563 |
| 1  | -5.061946 | -0.121962 | -2.213802 |
| 8  | -3.541552 | -0.966574 | -1.059178 |
| 1  | -3.114436 | -0.117807 | -0.862370 |
| 6  | -0.116170 | -2.176191 | 3.076903  |
| 1  | 0.593315  | -2.009886 | 3.888363  |
| 1  | -1.044639 | -1.639948 | 3.305805  |
| 1  | -0.326860 | -3.248373 | 3.007483  |
| 8  | 0.482438  | -1.686774 | 1.889770  |
| 1  | -0.090034 | -1.828709 | 1.117632  |

Cartesian coordinates of : BC7\_4

Atomic number (AN) and Cartesian coordinates

| AN | X         | Y         | Z         |
|----|-----------|-----------|-----------|
| 6  | 0.976828  | -1.950641 | -0.890213 |
| 1  | 1.381385  | -1.000220 | -1.265207 |
| 1  | -0.079818 | -2.022996 | -1.167896 |
| 1  | 1.520940  | -2.776205 | -1.354858 |
| 8  | 1.148611  | -2.054877 | 0.520387  |
| 1  | 0.380135  | -1.625613 | 0.943578  |
| 6  | -1.825975 | -0.373267 | 2.346195  |
| 1  | -2.810685 | 0.052477  | 2.132878  |
| 1  | -1.278350 | 0.322471  | 2.986693  |
| 1  | -1.939902 | -1.329958 | 2.859006  |
| 8  | -1.111568 | -0.629051 | 1.139808  |
| 1  | -0.849966 | 0.205320  | 0.688982  |
| 6  | -0.518679 | 1.097171  | -1.872635 |
| 1  | -1.207044 | 0.248805  | -1.938836 |

|   |           |           |           |
|---|-----------|-----------|-----------|
| 1 | 0.367435  | 0.894300  | -2.482069 |
| 1 | -1.013604 | 1.994526  | -2.260048 |
| 8 | -0.144075 | 1.297753  | -0.509482 |
| 1 | 0.844627  | 1.385338  | -0.455202 |
| 6 | 3.116324  | 2.620302  | -0.161718 |
| 1 | 4.152959  | 2.627692  | -0.515065 |
| 1 | 3.105546  | 2.768862  | 0.923553  |
| 1 | 2.580551  | 3.444836  | -0.636396 |
| 8 | 2.467452  | 1.413232  | -0.526770 |
| 1 | 2.875851  | 0.653506  | -0.035629 |
| 6 | 4.413775  | -1.433510 | 0.139964  |
| 1 | 4.117877  | -1.705716 | -0.880977 |
| 1 | 4.638999  | -2.345244 | 0.702327  |
| 1 | 5.315374  | -0.819853 | 0.091974  |
| 8 | 3.407434  | -0.673544 | 0.788768  |
| 1 | 2.592238  | -1.227108 | 0.859652  |
| 6 | -3.245619 | 1.848548  | 0.087078  |
| 1 | -4.169044 | 1.743209  | 0.662617  |
| 1 | -3.443149 | 2.527755  | -0.752698 |
| 1 | -2.971217 | 0.864198  | -0.321526 |
| 8 | -2.257927 | 2.358164  | 0.960031  |
| 1 | -1.412240 | 2.342958  | 0.485950  |
| 6 | -3.868791 | -1.952976 | -0.831735 |
| 1 | -4.330919 | -2.156794 | -1.799547 |
| 1 | -3.927547 | -2.863627 | -0.222394 |
| 1 | -4.444239 | -1.159207 | -0.335049 |
| 8 | -2.532792 | -1.563460 | -1.071821 |
| 1 | -2.100452 | -1.363207 | -0.222795 |

-----  
Cartesian coordinates of : BC7\_5

-----  
Atomic number (AN) and Cartesian coordinates

| AN | X         | Y         | Z         |
|----|-----------|-----------|-----------|
| 6  | -0.546841 | 0.154065  | 2.396093  |
| 1  | -0.278973 | 1.212923  | 2.312001  |
| 1  | -0.279031 | -0.218692 | 3.391653  |
| 1  | -1.626907 | 0.058252  | 2.254448  |
| 8  | 0.087698  | -0.612456 | 1.378808  |
| 1  | 1.033403  | -0.391985 | 1.342797  |
| 6  | 1.314456  | -2.687523 | -0.874959 |
| 1  | 0.517348  | -3.042132 | -1.536075 |
| 1  | 0.903685  | -2.547700 | 0.132590  |
| 1  | 2.107833  | -3.436793 | -0.842115 |
| 8  | 1.881459  | -1.479893 | -1.372806 |
| 1  | 1.146803  | -0.882894 | -1.639405 |
| 6  | -1.199651 | 0.565430  | -2.489333 |
| 1  | -1.217908 | 1.627073  | -2.760705 |
| 1  | -2.146761 | 0.285296  | -2.017757 |
| 1  | -1.073964 | -0.027150 | -3.397242 |
| 8  | -0.103082 | 0.275394  | -1.637514 |
| 1  | 0.007293  | 0.943429  | -0.930369 |
| 6  | -2.765660 | 1.779819  | 0.339290  |
| 1  | -3.063758 | 2.173718  | -0.642772 |
| 1  | -1.676015 | 1.627024  | 0.343107  |
| 1  | -2.998372 | 2.537010  | 1.093029  |
| 8  | -3.471790 | 0.606012  | 0.673897  |
| 1  | -3.070743 | -0.142393 | 0.196539  |
| 6  | -2.186744 | -2.555042 | 0.608347  |
| 1  | -2.188227 | -2.194173 | 1.643727  |
| 1  | -1.450640 | -3.363104 | 0.518209  |
| 1  | -3.175188 | -2.952870 | 0.370497  |
| 8  | -1.918394 | -1.509039 | -0.309343 |
| 1  | -1.061617 | -1.110018 | -0.067954 |

|   |          |           |           |
|---|----------|-----------|-----------|
| 6 | 1.170166 | 3.259994  | -0.562150 |
| 1 | 0.246583 | 3.820461  | -0.722063 |
| 1 | 1.872688 | 3.896190  | -0.013522 |
| 1 | 1.601374 | 3.002603  | -1.537200 |
| 8 | 0.833746 | 2.099350  | 0.180733  |
| 1 | 1.634695 | 1.563713  | 0.342728  |
| 6 | 4.003793 | -0.064577 | 1.062821  |
| 1 | 4.118797 | 0.608793  | 1.914074  |
| 1 | 4.190377 | -1.090298 | 1.398477  |
| 1 | 4.740443 | 0.202076  | 0.297901  |
| 8 | 2.681319 | 0.078754  | 0.570477  |
| 1 | 2.522020 | -0.536320 | -0.199262 |

-----  
Cartesian coordinates of : BC7\_7

-----  
Atomic number (AN) and Cartesian coordinates

| AN | X         | Y         | Z         |
|----|-----------|-----------|-----------|
| 8  | -3.640645 | -0.952112 | -0.031143 |
| 1  | -3.212487 | -0.089879 | 0.116092  |
| 8  | -2.237126 | 1.445489  | -0.004166 |
| 1  | -1.593047 | 1.687048  | 0.682903  |
| 8  | 0.156830  | 1.687021  | 1.391759  |
| 1  | 0.309780  | 0.704993  | 1.318130  |
| 6  | -4.991962 | -0.736513 | -0.372683 |
| 1  | -5.095469 | -0.118875 | -1.275166 |
| 1  | -5.441428 | -1.711875 | -0.571471 |
| 1  | -5.551640 | -0.258301 | 0.441529  |
| 6  | -1.539407 | 1.383374  | -1.237271 |
| 1  | -1.209200 | 2.375529  | -1.564023 |
| 1  | -0.661609 | 0.725934  | -1.167927 |
| 1  | -2.225104 | 0.970177  | -1.980642 |
| 6  | 0.539273  | 2.153566  | 2.678941  |
| 1  | -0.067367 | 1.687674  | 3.461867  |
| 1  | 1.596888  | 1.947451  | 2.875023  |
| 1  | 0.377294  | 3.232470  | 2.703020  |
| 8  | 0.515211  | -0.861801 | 0.892459  |
| 1  | 0.977992  | -0.807535 | 0.018650  |
| 6  | -0.719067 | -1.572667 | 0.726323  |
| 1  | -1.157130 | -1.386175 | -0.258460 |
| 1  | -0.554348 | -2.646764 | 0.860556  |
| 1  | -1.423487 | -1.222785 | 1.482552  |
| 6  | 2.305750  | -3.315686 | 0.138928  |
| 1  | 2.770148  | -4.292843 | -0.007969 |
| 1  | 1.360549  | -3.299457 | -0.426581 |
| 1  | 2.967092  | -2.543378 | -0.274816 |
| 8  | 2.092789  | -3.154151 | 1.524186  |
| 1  | 1.676442  | -2.289820 | 1.654194  |
| 6  | 1.307758  | -0.905708 | -2.688676 |
| 1  | 1.373130  | -1.993956 | -2.629471 |
| 1  | 0.275867  | -0.626791 | -2.934347 |
| 1  | 1.974071  | -0.557207 | -3.484006 |
| 8  | 1.704326  | -0.387461 | -1.429816 |
| 1  | 1.693948  | 0.596057  | -1.427993 |
| 6  | 2.869920  | 2.772304  | -0.522879 |
| 1  | 3.502952  | 2.784431  | -1.411379 |
| 1  | 2.782537  | 3.795097  | -0.141513 |
| 1  | 3.343204  | 2.140360  | 0.238056  |
| 8  | 1.601788  | 2.261295  | -0.908127 |
| 1  | 1.031455  | 2.220159  | -0.114124 |

-----  
Cartesian coordinates of : BC7\_2

-----  
Atomic number (AN) and Cartesian coordinates

| AN | X         | Y         | Z         |
|----|-----------|-----------|-----------|
| 8  | -2.643606 | 1.432607  | 0.915093  |
| 1  | -2.590048 | 0.591114  | 0.423070  |
| 8  | -2.366100 | -1.022971 | -0.334977 |
| 1  | -1.561531 | -1.091807 | -0.884503 |
| 8  | 0.115980  | -1.190940 | -1.513912 |
| 1  | 0.405329  | -0.220885 | -1.549351 |
| 6  | -3.650512 | 2.235867  | 0.343200  |
| 1  | -4.622399 | 1.726714  | 0.320740  |
| 1  | -3.747076 | 3.134121  | 0.957221  |
| 1  | -3.398434 | 2.545668  | -0.681731 |
| 6  | -2.286282 | -2.005913 | 0.685136  |
| 1  | -2.468668 | -3.009248 | 0.281032  |
| 1  | -1.308592 | -1.987281 | 1.182996  |
| 1  | -3.059496 | -1.780691 | 1.422813  |
| 6  | 0.387523  | -1.804058 | -2.766772 |
| 1  | -0.103697 | -1.262336 | -3.581505 |
| 1  | 1.464837  | -1.839325 | -2.960392 |
| 1  | -0.002091 | -2.824001 | -2.736670 |
| 8  | 1.397660  | 0.252981  | 2.064038  |
| 1  | 1.525306  | -0.680573 | 1.812798  |
| 6  | 0.030460  | 0.573644  | 1.818927  |
| 1  | -0.271682 | 0.277314  | 0.805725  |
| 1  | -0.631333 | 0.088541  | 2.543251  |
| 1  | -0.088116 | 1.654160  | 1.910977  |
| 6  | 3.805880  | 2.086683  | 0.175195  |
| 1  | 4.002563  | 2.751615  | -0.667945 |
| 1  | 4.238230  | 2.529645  | 1.078504  |
| 1  | 4.288494  | 1.121349  | -0.017326 |
| 8  | 2.402093  | 1.952387  | 0.300804  |
| 1  | 2.177554  | 1.324234  | 1.031778  |
| 6  | -0.400177 | 2.114696  | -1.541628 |
| 1  | -1.189729 | 1.655893  | -2.144046 |
| 1  | -0.758119 | 2.203718  | -0.510207 |
| 1  | -0.179751 | 3.106695  | -1.947841 |
| 8  | 0.747931  | 1.275659  | -1.629210 |
| 1  | 1.423609  | 1.564630  | -0.960703 |
| 6  | 1.210604  | -3.567742 | 0.879969  |
| 1  | 1.613390  | -3.844305 | 1.855777  |
| 1  | 0.179431  | -3.936966 | 0.810936  |
| 1  | 1.814908  | -4.051950 | 0.103727  |
| 8  | 1.267104  | -2.159216 | 0.775594  |
| 1  | 0.893635  | -1.869157 | -0.082720 |

-----  
Cartesian coordinates of : BL7\_3

-----  
Atomic number (AN) and Cartesian coordinates

| AN | X         | Y         | Z         |
|----|-----------|-----------|-----------|
| 8  | -1.452245 | 0.521155  | 2.289134  |
| 1  | -2.341654 | 0.530524  | 1.893440  |
| 8  | -3.599564 | 0.646610  | 0.526734  |
| 1  | -3.098540 | 0.472115  | -0.295912 |
| 8  | -2.128460 | 0.023335  | -1.697965 |
| 1  | -1.853429 | -0.905974 | -1.644483 |
| 6  | -0.621056 | 1.271696  | 1.428318  |
| 1  | -1.031010 | 2.271880  | 1.229039  |
| 1  | 0.346820  | 1.392010  | 1.922478  |
| 1  | -0.454739 | 0.757673  | 0.469678  |
| 6  | -4.366635 | 1.825260  | 0.365808  |
| 1  | -3.730355 | 2.704335  | 0.202112  |

|   |           |           |           |
|---|-----------|-----------|-----------|
| 1 | -5.068710 | 1.733444  | -0.470562 |
| 1 | -4.936584 | 1.976223  | 1.284278  |
| 6 | -1.099130 | 0.813563  | -2.278092 |
| 1 | -0.117018 | 0.552146  | -1.871498 |
| 1 | -1.084819 | 0.698781  | -3.366941 |
| 1 | -1.314894 | 1.857250  | -2.037544 |
| 8 | -1.554723 | -2.556756 | -0.753012 |
| 1 | -1.878104 | -3.390629 | -1.110846 |
| 6 | -2.175749 | -2.284912 | 0.515764  |
| 1 | -3.240963 | -2.072764 | 0.391092  |
| 1 | -2.028548 | -3.122040 | 1.203301  |
| 1 | -1.685843 | -1.398415 | 0.924798  |
| 6 | 1.279924  | -1.491251 | 1.015732  |
| 1 | 2.204823  | -0.934688 | 1.186903  |
| 1 | 0.517632  | -1.178411 | 1.739380  |
| 1 | 1.497783  | -2.556758 | 1.142558  |
| 8 | 0.856776  | -1.214804 | -0.320086 |
| 1 | 0.167520  | -1.842910 | -0.585163 |
| 6 | 2.304662  | 1.708657  | -0.618612 |
| 1 | 3.008582  | 2.496048  | -0.896943 |
| 1 | 1.285856  | 2.074492  | -0.799449 |
| 1 | 2.419540  | 1.496265  | 0.453118  |
| 8 | 2.605566  | 0.571981  | -1.408113 |
| 1 | 1.957311  | -0.127276 | -1.196189 |
| 6 | 5.558979  | 0.475200  | 0.591311  |
| 1 | 6.067820  | 0.206979  | 1.519642  |
| 1 | 6.280198  | 0.396405  | -0.232226 |
| 1 | 5.230975  | 1.521409  | 0.669320  |
| 8 | 4.472674  | -0.409715 | 0.430561  |
| 1 | 3.994189  | -0.171829 | -0.382784 |

-----  
Cartesian coordinates of : BC7\_1

-----  
Atomic number (AN) and Cartesian coordinates

| AN | X         | Y         | Z         |
|----|-----------|-----------|-----------|
| 1  | 1.086222  | 3.514731  | 1.895513  |
| 6  | 0.052822  | 3.189770  | 1.735797  |
| 1  | -0.386433 | 2.908841  | 2.699046  |
| 1  | -0.518000 | 4.019550  | 1.315096  |
| 8  | -0.002625 | 2.109414  | 0.814609  |
| 1  | 0.439934  | 1.307900  | 1.219665  |
| 1  | -0.552884 | -0.645219 | -2.395338 |
| 6  | 0.215219  | -0.859681 | -1.645230 |
| 1  | 1.198063  | -0.728804 | -2.102081 |
| 1  | 0.118041  | -0.140342 | -0.820111 |
| 8  | 0.115303  | -2.200884 | -1.181572 |
| 1  | -0.802198 | -2.308404 | -0.864208 |
| 1  | -4.395628 | -1.618430 | 0.274378  |
| 6  | -3.419682 | -2.062936 | 0.498126  |
| 1  | -3.159227 | -1.835256 | 1.540453  |
| 1  | -3.495906 | -3.146283 | 0.387131  |
| 8  | -2.428408 | -1.604411 | -0.399651 |
| 1  | -2.383248 | -0.621604 | -0.361424 |
| 1  | -1.206791 | 1.706652  | -2.011196 |
| 6  | -2.229462 | 1.680109  | -1.616924 |
| 1  | -2.635540 | 2.697175  | -1.592025 |
| 1  | -2.848747 | 1.071641  | -2.280031 |
| 8  | -2.272166 | 1.087475  | -0.324340 |
| 1  | -1.546664 | 1.474384  | 0.206468  |
| 6  | 2.570661  | 1.514234  | -1.108831 |
| 1  | 3.174351  | 1.156556  | -1.946968 |
| 1  | 3.146158  | 2.279726  | -0.571720 |
| 1  | 2.391966  | 0.668941  | -0.425998 |

|   |           |           |           |
|---|-----------|-----------|-----------|
| 8 | 1.367511  | 2.029154  | -1.636394 |
| 1 | 0.807164  | 2.265614  | -0.878802 |
| 6 | -0.286197 | -0.776118 | 2.240153  |
| 1 | -0.084172 | -1.536063 | 3.001125  |
| 1 | -0.689096 | -1.256820 | 1.340052  |
| 1 | -1.031755 | -0.075625 | 2.627079  |
| 8 | 0.892392  | -0.034092 | 1.946009  |
| 1 | 1.509766  | -0.645847 | 1.480330  |
| 6 | 3.334857  | -2.156021 | -0.044848 |
| 1 | 3.374915  | -1.604472 | -0.992643 |
| 1 | 3.542356  | -3.213434 | -0.240082 |
| 1 | 4.106881  | -1.764543 | 0.620628  |
| 8 | 2.084578  | -1.994214 | 0.599553  |
| 1 | 1.358484  | -2.246226 | -0.019495 |

-----

Cartesian coordinates of : BC7\_6

-----

Atomic number (AN) and Cartesian coordinates

| AN | X         | Y         | Z         |
|----|-----------|-----------|-----------|
| 1  | -1.292980 | 0.125393  | 2.084717  |
| 6  | -0.239062 | 0.084610  | 1.798988  |
| 1  | -0.138358 | 0.412928  | 0.756423  |
| 1  | 0.324753  | 0.768301  | 2.435634  |
| 8  | 0.299175  | -1.228181 | 1.980747  |
| 1  | -0.260962 | -1.832852 | 1.463162  |
| 1  | -1.055573 | -3.969645 | -1.062456 |
| 6  | -1.789094 | -3.183486 | -0.857324 |
| 1  | -2.240514 | -2.857618 | -1.801371 |
| 1  | -2.571213 | -3.589758 | -0.213494 |
| 8  | -1.191562 | -2.090080 | -0.175378 |
| 1  | -0.445418 | -1.713938 | -0.719762 |
| 1  | 0.740371  | 0.561689  | -3.005138 |
| 6  | 0.192051  | 0.331059  | -2.085809 |
| 1  | 0.276901  | 1.171374  | -1.390216 |
| 1  | -0.860846 | 0.165309  | -2.325720 |
| 8  | 0.693825  | -0.871340 | -1.500314 |
| 1  | 1.470620  | -0.705307 | -0.933666 |
| 1  | 3.423230  | -2.761652 | 0.606113  |
| 6  | 3.658585  | -1.714553 | 0.824728  |
| 1  | 4.027299  | -1.634953 | 1.852437  |
| 1  | 4.443354  | -1.382080 | 0.142512  |
| 8  | 2.529136  | -0.881339 | 0.620676  |
| 1  | 1.786925  | -1.131747 | 1.230069  |
| 6  | 3.081122  | 1.827307  | -1.186929 |
| 1  | 2.704900  | 2.603997  | -1.857044 |
| 1  | 4.109904  | 2.082667  | -0.903490 |
| 1  | 3.097077  | 0.874941  | -1.737701 |
| 8  | 2.222665  | 1.775252  | -0.067356 |
| 1  | 2.452508  | 0.983196  | 0.444977  |
| 6  | -0.898996 | 3.333966  | 0.334128  |
| 1  | -1.168640 | 3.745767  | -0.648286 |
| 1  | 0.083594  | 2.848472  | 0.260485  |
| 1  | -0.817724 | 4.165845  | 1.037672  |
| 8  | -1.895181 | 2.461277  | 0.829926  |
| 1  | -2.049990 | 1.741871  | 0.194499  |
| 6  | -3.992304 | 0.128781  | 0.185688  |
| 1  | -3.820613 | 0.138693  | 1.268935  |
| 1  | -4.581436 | -0.756610 | -0.080664 |
| 1  | -4.559563 | 1.022402  | -0.078881 |
| 8  | -2.770860 | 0.172034  | -0.536046 |
| 1  | -2.249010 | -0.623762 | -0.318606 |

-----

Cartesian coordinates of : DC7

-----  
Atomic number (AN) and Cartesian coordinates

| AN | X         | Y         | Z         |
|----|-----------|-----------|-----------|
| 1  | -2.790752 | -2.941273 | 0.015453  |
| 6  | -2.796496 | -2.008369 | -0.559323 |
| 1  | -2.125851 | -2.120280 | -1.421590 |
| 1  | -3.809240 | -1.820587 | -0.921339 |
| 8  | -2.421262 | -0.913356 | 0.251399  |
| 1  | -1.506339 | -1.058224 | 0.557150  |
| 1  | -2.006919 | 2.223365  | 1.367680  |
| 6  | -2.668271 | 2.476666  | 0.532307  |
| 1  | -3.710964 | 2.410558  | 0.861723  |
| 1  | -2.472062 | 3.501000  | 0.206912  |
| 8  | -2.436595 | 1.619279  | -0.574208 |
| 1  | -2.494994 | 0.682023  | -0.265234 |
| 1  | 0.083989  | 0.632968  | 3.524262  |
| 6  | 0.122438  | -0.129997 | 2.737326  |
| 1  | 1.127241  | -0.568904 | 2.705395  |
| 1  | -0.592973 | -0.919314 | 2.976525  |
| 8  | -0.250590 | 0.405075  | 1.476872  |
| 1  | 0.424695  | 1.038949  | 1.184691  |
| 1  | -0.922505 | -0.102152 | -2.685621 |
| 6  | -0.051516 | 0.173890  | -2.080900 |
| 1  | -0.025233 | -0.454374 | -1.179596 |
| 1  | 0.851778  | 0.000739  | -2.671519 |
| 8  | -0.095340 | 1.555142  | -1.745664 |
| 1  | -0.978687 | 1.713660  | -1.310807 |
| 1  | 1.940339  | 3.831318  | 0.181451  |
| 6  | 2.544383  | 2.929570  | 0.034468  |
| 1  | 3.103160  | 3.024055  | -0.903010 |
| 1  | 3.253474  | 2.844477  | 0.860334  |
| 8  | 1.733755  | 1.767742  | 0.032333  |
| 1  | 1.055497  | 1.795687  | -0.712288 |
| 6  | 0.392235  | -3.319236 | -0.386556 |
| 1  | -0.450809 | -4.006504 | -0.488625 |
| 1  | 0.629692  | -2.911488 | -1.380520 |
| 1  | 1.258004  | -3.887261 | -0.023684 |
| 8  | 0.018845  | -2.304329 | 0.519983  |
| 1  | 0.781020  | -1.699808 | 0.617879  |
| 6  | 3.293847  | -1.315257 | -0.578720 |
| 1  | 3.481207  | -2.374225 | -0.389210 |
| 1  | 2.881241  | -1.207838 | -1.590303 |
| 1  | 4.248977  | -0.780031 | -0.526747 |
| 8  | 2.389612  | -0.853982 | 0.407180  |
| 1  | 2.239895  | 0.105289  | 0.275866  |

-----  
Cartesian coordinates of : BL7\_1-----  
Atomic number (AN) and Cartesian coordinates

| AN | X        | Y         | Z         |
|----|----------|-----------|-----------|
| 8  | 2.494795 | -2.393403 | 0.277720  |
| 1  | 2.839406 | -1.482931 | 0.355041  |
| 8  | 3.515614 | 0.164400  | 0.503827  |
| 1  | 2.905030 | 0.917890  | 0.356859  |
| 8  | 1.772446 | 2.242025  | 0.415580  |
| 1  | 0.875885 | 1.940550  | 0.651492  |
| 6  | 3.306740 | -3.088621 | -0.640921 |
| 1  | 4.353209 | -3.138450 | -0.311623 |
| 1  | 2.923015 | -4.108472 | -0.719745 |
| 1  | 3.281353 | -2.632016 | -1.640834 |



|   |           |           |           |
|---|-----------|-----------|-----------|
| 6 | 4.164625  | 0.356538  | 1.748367  |
| 1 | 4.822211  | 1.232549  | 1.722116  |
| 1 | 3.442880  | 0.479565  | 2.565159  |
| 1 | 4.768829  | -0.531423 | 1.946954  |
| 6 | 1.704094  | 3.199523  | -0.632675 |
| 1 | 1.147511  | 2.809513  | -1.492408 |
| 1 | 1.238887  | 4.127445  | -0.283089 |
| 1 | 2.729573  | 3.417193  | -0.937706 |
| 8 | -0.478242 | 0.735630  | 0.800560  |
| 1 | -1.454283 | 0.658473  | 0.735045  |
| 6 | 0.042762  | -0.517022 | 1.243125  |
| 1 | 1.119733  | -0.397794 | 1.380123  |
| 1 | -0.408318 | -0.812029 | 2.195371  |
| 1 | -0.118126 | -1.305115 | 0.499102  |
| 8 | -3.013074 | 0.081456  | 0.253568  |
| 1 | -3.804716 | -0.161607 | 0.760762  |
| 6 | -2.936071 | -0.745462 | -0.901340 |
| 1 | -2.863406 | -1.804158 | -0.627738 |
| 1 | -3.811668 | -0.600529 | -1.545103 |
| 1 | -2.040023 | -0.456382 | -1.455938 |
| 8 | -5.588167 | -0.577164 | 0.991773  |
| 1 | -6.067452 | -1.316157 | 1.379156  |
| 6 | -6.387273 | 0.077524  | 0.013384  |
| 1 | -6.671626 | -0.604846 | -0.794287 |
| 1 | -7.284977 | 0.514704  | 0.461211  |
| 1 | -5.773053 | 0.879180  | -0.400147 |
| 6 | 1.419317  | -0.017848 | -2.088776 |
| 1 | 1.529225  | -0.351893 | -3.123065 |
| 1 | 2.221585  | 0.701251  | -1.871124 |
| 1 | 1.537113  | -0.882294 | -1.423260 |
| 8 | 0.136390  | 0.571238  | -1.968460 |
| 1 | -0.041053 | 0.726549  | -1.025867 |

-----  
Cartesian coordinates of : BL7\_2

-----  
Atomic number (AN) and Cartesian coordinates

| AN | X         | Y         | Z         |
|----|-----------|-----------|-----------|
| 8  | 5.950131  | -0.818138 | -0.134233 |
| 1  | 5.160570  | -0.803068 | -0.699451 |
| 8  | 3.442494  | -0.225084 | -1.193441 |
| 1  | 2.571248  | -0.632077 | -1.056537 |
| 8  | 1.003540  | -0.756495 | -0.044170 |
| 1  | 0.056966  | -1.016943 | -0.165665 |
| 6  | 5.506913  | -0.749198 | 1.198219  |
| 1  | 4.933732  | -1.640282 | 1.493026  |
| 1  | 6.388889  | -0.684005 | 1.839856  |
| 1  | 4.884132  | 0.139724  | 1.382721  |
| 6  | 3.335660  | 1.153725  | -0.884806 |
| 1  | 2.719828  | 1.686682  | -1.617521 |
| 1  | 2.903478  | 1.311828  | 0.113608  |
| 1  | 4.346523  | 1.567949  | -0.896526 |
| 6  | 1.428067  | -1.052594 | 1.278455  |
| 1  | 0.817823  | -0.524312 | 2.020306  |
| 1  | 1.385356  | -2.128827 | 1.475691  |
| 1  | 2.466180  | -0.722291 | 1.370462  |
| 8  | -1.590394 | -1.028443 | -0.490511 |
| 1  | -2.048407 | -0.352843 | 0.062650  |
| 6  | -1.776041 | -0.642894 | -1.847886 |
| 1  | -1.302748 | -1.399435 | -2.476370 |
| 1  | -2.844101 | -0.597871 | -2.095183 |
| 1  | -1.320101 | 0.334333  | -2.045631 |
| 8  | -3.111921 | 0.821358  | 0.717352  |
| 1  | -3.973113 | 0.396431  | 0.875464  |

|   |           |           |           |
|---|-----------|-----------|-----------|
| 6 | -3.305142 | 1.944639  | -0.138863 |
| 1 | -3.989533 | 1.698955  | -0.958978 |
| 1 | -3.708395 | 2.793657  | 0.423567  |
| 1 | -2.329154 | 2.210692  | -0.550232 |
| 8 | -5.361590 | -0.744400 | 0.533912  |
| 1 | -6.262144 | -0.796974 | 0.868898  |
| 6 | -4.902514 | -2.038446 | 0.146781  |
| 1 | -4.969508 | -2.749014 | 0.976431  |
| 1 | -5.471152 | -2.416049 | -0.708731 |
| 1 | -3.853763 | -1.929364 | -0.137215 |
| 6 | -0.125980 | 2.243209  | 1.005054  |
| 1 | -0.549543 | 3.249952  | 1.042353  |
| 1 | -0.793813 | 1.569054  | 1.558279  |
| 1 | 0.855185  | 2.268552  | 1.497929  |
| 8 | -0.019397 | 1.874530  | -0.357056 |
| 1 | 0.456889  | 1.028281  | -0.389747 |

-----

Cartesian coordinates of : BC7\_3

-----

Atomic number (AN) and Cartesian coordinates

| AN | X         | Y         | Z         |
|----|-----------|-----------|-----------|
| 1  | 0.427341  | -2.361012 | -1.754637 |
| 6  | 0.938898  | -2.818997 | -0.901940 |
| 1  | 0.812144  | -3.905329 | -0.946568 |
| 1  | 2.002899  | -2.576893 | -0.965458 |
| 8  | 0.439554  | -2.308510 | 0.329353  |
| 1  | -0.551177 | -2.263808 | 0.282569  |
| 1  | 3.312720  | -1.504502 | 1.701941  |
| 6  | 2.694020  | -0.653692 | 2.011197  |
| 1  | 2.132905  | -0.928711 | 2.909890  |
| 1  | 3.345649  | 0.191699  | 2.244567  |
| 8  | 1.820713  | -0.259691 | 0.963057  |
| 1  | 1.202608  | -1.028513 | 0.749452  |
| 1  | 1.924067  | 1.889899  | -1.178378 |
| 6  | 1.677352  | 2.667311  | -0.446039 |
| 1  | 2.600757  | 3.029061  | 0.021287  |
| 1  | 1.199243  | 3.502167  | -0.963104 |
| 8  | 0.770883  | 2.188439  | 0.536300  |
| 1  | 1.086835  | 1.309969  | 0.837453  |
| 1  | -4.013398 | -3.044934 | 0.427716  |
| 6  | -3.039594 | -2.876455 | 0.900719  |
| 1  | -3.189469 | -2.325638 | 1.836087  |
| 1  | -2.590158 | -3.845114 | 1.129605  |
| 8  | -2.164717 | -2.187413 | 0.025950  |
| 1  | -2.530835 | -1.283190 | -0.150033 |
| 1  | -1.910219 | 4.332018  | 0.698508  |
| 6  | -2.331236 | 3.342540  | 0.908067  |
| 1  | -2.109402 | 3.073912  | 1.946919  |
| 1  | -3.415048 | 3.389335  | 0.780488  |
| 8  | -1.830246 | 2.375685  | 0.002078  |
| 1  | -0.861284 | 2.266357  | 0.156919  |
| 1  | -3.086084 | 0.566139  | -2.435430 |
| 6  | -3.843042 | 0.361351  | -1.670284 |
| 1  | -4.565109 | 1.185189  | -1.654209 |
| 1  | -4.368858 | -0.559637 | -1.932194 |
| 8  | -3.255602 | 0.177512  | -0.393915 |
| 1  | -2.705790 | 0.972265  | -0.183152 |
| 6  | 4.635863  | 0.291912  | -1.009366 |
| 1  | 5.316864  | 0.166309  | -1.853659 |
| 1  | 4.483948  | 1.368752  | -0.849660 |
| 1  | 5.117247  | -0.128073 | -0.115278 |
| 8  | 3.433897  | -0.373025 | -1.327678 |
| 1  | 2.822171  | -0.275514 | -0.576925 |

-----  
Cartesian coordinates of : CY7\_1  
-----

Atomic number (AN) and Cartesian coordinates

| AN | X         | Y         | Z         |
|----|-----------|-----------|-----------|
| 8  | 1.361520  | 2.242534  | -0.867500 |
| 1  | 2.015512  | 1.537837  | -0.637338 |
| 8  | 3.125076  | 0.416398  | -0.078421 |
| 1  | 2.753687  | -0.454400 | 0.211420  |
| 8  | 2.077295  | -1.847362 | 0.823147  |
| 1  | 1.153426  | -1.924099 | 0.476742  |
| 6  | 1.275134  | 2.386755  | -2.271657 |
| 1  | 0.830091  | 1.502043  | -2.745877 |
| 1  | 0.639785  | 3.249616  | -2.481068 |
| 1  | 2.262458  | 2.564154  | -2.711404 |
| 6  | 3.837862  | 0.977804  | 1.012753  |
| 1  | 3.212382  | 1.034240  | 1.911554  |
| 1  | 4.735023  | 0.391108  | 1.238298  |
| 1  | 4.140056  | 1.988339  | 0.730265  |
| 6  | 2.781880  | -3.034300 | 0.496723  |
| 1  | 2.394468  | -3.887177 | 1.063616  |
| 1  | 2.715690  | -3.256833 | -0.574508 |
| 1  | 3.830665  | -2.884685 | 0.762295  |
| 8  | -0.196423 | -1.888545 | -0.489380 |
| 1  | -1.135558 | -1.876505 | -0.179893 |
| 6  | -0.039765 | -0.853695 | -1.445766 |
| 1  | 1.032996  | -0.671023 | -1.573418 |
| 1  | -0.462704 | -1.144398 | -2.414902 |
| 1  | -0.509615 | 0.080239  | -1.110576 |
| 8  | -2.774252 | -1.600562 | 0.049459  |
| 1  | -2.956277 | -0.638203 | 0.190730  |
| 6  | -3.526854 | -2.039751 | -1.068649 |
| 1  | -4.593140 | -2.102437 | -0.824938 |
| 1  | -3.397538 | -1.369565 | -1.926971 |
| 1  | -3.172125 | -3.036208 | -1.341603 |
| 8  | -3.146721 | 1.013152  | 0.249706  |
| 1  | -2.247367 | 1.417380  | 0.324637  |
| 6  | -3.963662 | 1.540969  | 1.280950  |
| 1  | -3.511805 | 1.390088  | 2.268597  |
| 1  | -4.140937 | 2.611013  | 1.130785  |
| 1  | -4.921961 | 1.018454  | 1.249120  |
| 8  | -0.709316 | 1.857293  | 0.777985  |
| 1  | -0.023544 | 2.155037  | 0.137686  |
| 6  | -0.129038 | 0.857291  | 1.602450  |
| 1  | 0.665745  | 0.318279  | 1.073646  |
| 1  | 0.285364  | 1.298576  | 2.515396  |
| 1  | -0.905548 | 0.135434  | 1.876920  |

-----

Cartesian coordinates of : CY7\_4

Atomic number (AN) and Cartesian coordinates

| AN | X         | Y         | Z         |
|----|-----------|-----------|-----------|
| 1  | -4.652947 | -1.791330 | -0.535771 |
| 6  | -3.762946 | -2.088284 | 0.031025  |
| 1  | -3.877849 | -1.755288 | 1.069675  |
| 1  | -3.690560 | -3.178709 | 0.014849  |
| 8  | -2.585492 | -1.566980 | -0.556069 |
| 1  | -2.598187 | -0.581807 | -0.466493 |
| 1  | -1.524347 | -3.567397 | 1.957878  |
| 6  | -0.711695 | -2.871630 | 1.717309  |

|   |           |           |           |
|---|-----------|-----------|-----------|
| 1 | -0.978009 | -1.872459 | 2.082391  |
| 1 | 0.193873  | -3.203065 | 2.230725  |
| 8 | -0.446027 | -2.860549 | 0.326392  |
| 1 | -1.186165 | -2.380836 | -0.119395 |
| 1 | 1.889295  | -3.027297 | -2.193052 |
| 6 | 2.484632  | -3.156960 | -1.282110 |
| 1 | 2.413946  | -4.200328 | -0.956044 |
| 1 | 3.528663  | -2.930855 | -1.511488 |
| 8 | 2.066182  | -2.275675 | -0.256480 |
| 1 | 1.113537  | -2.446708 | -0.050598 |
| 1 | -0.492572 | 4.452889  | 1.430226  |
| 6 | -0.982748 | 3.479721  | 1.547586  |
| 1 | -0.532991 | 2.957471  | 2.399566  |
| 1 | -2.042660 | 3.644388  | 1.755434  |
| 8 | -0.887527 | 2.716196  | 0.359919  |
| 1 | 0.066281  | 2.522159  | 0.182023  |
| 1 | 4.917738  | -0.618665 | 0.404666  |
| 6 | 4.119024  | 0.030257  | 0.781532  |
| 1 | 3.747409  | -0.377467 | 1.728241  |
| 1 | 4.533873  | 1.024401  | 0.965097  |
| 8 | 3.079851  | 0.162691  | -0.171073 |
| 1 | 2.631303  | -0.713431 | -0.267555 |
| 1 | 2.202988  | 2.730640  | -1.990450 |
| 6 | 2.269790  | 3.218213  | -1.011578 |
| 1 | 3.320462  | 3.447684  | -0.800278 |
| 1 | 1.707247  | 4.154384  | -1.045142 |
| 8 | 1.710478  | 2.412481  | 0.009706  |
| 1 | 2.151101  | 1.526663  | -0.012272 |
| 1 | -2.802754 | 1.890590  | -2.151583 |
| 6 | -3.492821 | 1.704853  | -1.321041 |
| 1 | -3.922839 | 2.658804  | -0.996172 |
| 1 | -4.300437 | 1.058484  | -1.672944 |
| 8 | -2.847265 | 1.047057  | -0.245370 |
| 1 | -2.076424 | 1.598290  | 0.035925  |

-----  
 Cartesian coordinates of : CY7\_2

-----  
 Atomic number (AN) and Cartesian coordinates

| AN | X         | Y         | Z         |
|----|-----------|-----------|-----------|
| 1  | -0.889282 | 4.447066  | -0.846180 |
| 6  | -1.306976 | 3.734773  | -0.126393 |
| 1  | -0.869021 | 3.927880  | 0.860283  |
| 1  | -2.386344 | 3.887133  | -0.068148 |
| 8  | -1.079327 | 2.398103  | -0.543129 |
| 1  | -0.102018 | 2.248042  | -0.577254 |
| 1  | 0.084140  | 1.157689  | 1.856670  |
| 6  | -0.603793 | 0.302828  | 1.866024  |
| 1  | -0.140277 | -0.520540 | 1.303221  |
| 1  | -0.754785 | -0.018557 | 2.899094  |
| 8  | -1.865622 | 0.661919  | 1.325272  |
| 1  | -1.698125 | 1.284089  | 0.577445  |
| 1  | -4.178981 | -0.722236 | -0.923305 |
| 6  | -4.160222 | -1.527785 | -0.178349 |
| 1  | -4.951584 | -1.350103 | 0.557768  |
| 1  | -4.358786 | -2.474933 | -0.683219 |
| 8  | -2.895279 | -1.630222 | 0.449450  |
| 1  | -2.648726 | -0.760577 | 0.846568  |
| 1  | 3.687024  | -0.663968 | 2.390032  |
| 6  | 2.821103  | -0.033215 | 2.160768  |
| 1  | 1.954554  | -0.409299 | 2.718470  |
| 1  | 3.034723  | 0.987296  | 2.487148  |
| 8  | 2.569045  | -0.003858 | 0.768206  |
| 1  | 2.218461  | -0.888211 | 0.481980  |

|   |           |           |           |
|---|-----------|-----------|-----------|
| 1 | 0.102820  | -0.053827 | -0.995040 |
| 6 | -0.608017 | -0.655321 | -1.579720 |
| 1 | -1.571495 | -0.135668 | -1.581358 |
| 1 | -0.244821 | -0.728975 | -2.608579 |
| 8 | -0.728464 | -1.964857 | -1.042003 |
| 1 | -1.540400 | -1.992284 | -0.479418 |
| 1 | 2.300488  | -2.725181 | -1.839515 |
| 6 | 2.393922  | -3.104748 | -0.814978 |
| 1 | 2.104008  | -4.160400 | -0.798359 |
| 1 | 3.437400  | -3.021296 | -0.503284 |
| 8 | 1.606770  | -2.349851 | 0.090705  |
| 1 | 0.679384  | -2.301727 | -0.259815 |
| 1 | 2.092683  | 1.015751  | -2.245832 |
| 6 | 2.206190  | 2.002011  | -1.778530 |
| 1 | 3.273138  | 2.223994  | -1.672866 |
| 1 | 1.751617  | 2.752387  | -2.429267 |
| 8 | 1.550032  | 2.058747  | -0.523509 |
| 1 | 1.903719  | 1.325349  | 0.039900  |

-----  
Cartesian coordinates of : CY7\_3

-----  
Atomic number (AN) and Cartesian coordinates

| AN | X         | Y         | Z         |
|----|-----------|-----------|-----------|
| 1  | -1.855116 | 3.734765  | -1.892273 |
| 6  | -2.429286 | 3.000755  | -1.316855 |
| 1  | -2.671141 | 3.428077  | -0.336094 |
| 1  | -3.359582 | 2.792011  | -1.850010 |
| 8  | -1.718167 | 1.782201  | -1.193570 |
| 1  | -0.914992 | 1.919462  | -0.630487 |
| 1  | -4.691181 | 0.899908  | 0.380747  |
| 6  | -3.829049 | 0.424162  | 0.861946  |
| 1  | -3.256255 | 1.188490  | 1.402767  |
| 1  | -4.193029 | -0.312701 | 1.581615  |
| 8  | -3.023833 | -0.251074 | -0.088712 |
| 1  | -2.546142 | 0.434641  | -0.617380 |
| 1  | -2.306727 | -3.556650 | -0.427067 |
| 6  | -2.148581 | -3.410473 | 0.648426  |
| 1  | -3.117317 | -3.450669 | 1.158691  |
| 1  | -1.521211 | -4.220447 | 1.025179  |
| 8  | -1.481938 | -2.187188 | 0.914443  |
| 1  | -2.040332 | -1.451255 | 0.566852  |
| 1  | 4.646110  | 1.845114  | 1.219589  |
| 6  | 3.560148  | 1.906387  | 1.351021  |
| 1  | 3.257612  | 1.201222  | 2.134759  |
| 1  | 3.303312  | 2.919824  | 1.667094  |
| 8  | 2.884286  | 1.647127  | 0.131886  |
| 1  | 2.991601  | 0.688466  | -0.076485 |
| 1  | 0.102754  | -0.042801 | -1.189863 |
| 6  | 0.115958  | -1.065284 | -1.586484 |
| 1  | -0.907801 | -1.354718 | -1.850080 |
| 1  | 0.729205  | -1.082740 | -2.490042 |
| 8  | 0.680004  | -1.981629 | -0.657016 |
| 1  | 0.007679  | -2.123392 | 0.048612  |
| 1  | 3.689377  | -1.651651 | -2.003247 |
| 6  | 4.014955  | -1.649784 | -0.956303 |
| 1  | 4.176829  | -2.683280 | -0.631866 |
| 1  | 4.960943  | -1.108587 | -0.885451 |
| 8  | 3.076916  | -0.996231 | -0.120542 |
| 1  | 2.193055  | -1.426916 | -0.230181 |
| 1  | 0.295207  | 1.166349  | 2.459545  |
| 6  | 0.112017  | 0.843215  | 1.428607  |
| 1  | 0.788344  | 0.013381  | 1.188410  |
| 1  | -0.916398 | 0.477300  | 1.351447  |

```
8      0.275886      1.923860      0.521460
1      1.233000      1.966396      0.279466
```

---

Cartesian coordinates of the methanol octamer

Cartesian coordinates of : BL8\_3

---

Atomic number (AN) and Cartesian coordinates

| AN | X         | Y         | Z         |
|----|-----------|-----------|-----------|
| 6  | 0.436719  | 2.302831  | 2.593685  |
| 1  | 1.412933  | 2.782826  | 2.722787  |
| 1  | 0.552132  | 1.216564  | 2.680956  |
| 1  | -0.232121 | 2.653903  | 3.380250  |
| 8  | -0.147319 | 2.667465  | 1.350944  |
| 1  | 0.375851  | 2.307940  | 0.613551  |
| 6  | 0.288414  | -0.074457 | -0.464528 |
| 1  | -0.289859 | -0.795658 | -1.050954 |
| 1  | -0.087979 | -0.069579 | 0.565147  |
| 1  | 1.331883  | -0.393814 | -0.463949 |
| 8  | 0.235382  | 1.237100  | -1.041662 |
| 1  | -0.691152 | 1.516172  | -1.126140 |
| 6  | -3.152615 | 3.221832  | -0.479219 |
| 1  | -2.559890 | 4.111389  | -0.712878 |
| 1  | -3.844559 | 3.449031  | 0.337389  |
| 1  | -3.728045 | 2.936386  | -1.361394 |
| 8  | -2.310673 | 2.124272  | -0.146291 |
| 1  | -1.717574 | 2.364329  | 0.598295  |
| 6  | 1.233079  | -3.295391 | -0.290213 |
| 1  | 0.394222  | -3.278024 | -0.998618 |
| 1  | 1.458734  | -4.342328 | -0.047932 |
| 1  | 2.104702  | -2.846149 | -0.774932 |
| 8  | 0.935064  | -2.547717 | 0.875257  |
| 1  | -0.016703 | -2.639820 | 1.046692  |
| 6  | -2.840079 | -3.533216 | 1.061779  |
| 1  | -3.494448 | -3.760712 | 0.211510  |
| 1  | -3.453463 | -3.158335 | 1.889431  |
| 1  | -2.350104 | -4.455706 | 1.379717  |
| 8  | -1.828531 | -2.612606 | 0.703849  |
| 1  | -2.244532 | -1.791010 | 0.374878  |
| 6  | -3.075046 | -0.574006 | -1.835665 |
| 1  | -2.219347 | -0.031769 | -2.257812 |
| 1  | -3.998267 | -0.181967 | -2.276971 |
| 1  | -2.978521 | -1.629215 | -2.101516 |
| 8  | -3.105346 | -0.486946 | -0.421404 |
| 1  | -2.938539 | 0.438228  | -0.162279 |
| 6  | 3.932516  | -1.223330 | 0.285256  |
| 1  | 2.995282  | -1.118353 | 0.850935  |
| 1  | 4.674487  | -0.509368 | 0.667599  |
| 1  | 4.311220  | -2.232742 | 0.464586  |
| 8  | 3.734736  | -1.085175 | -1.108060 |
| 1  | 3.563930  | -0.150594 | -1.309931 |
| 6  | 2.984445  | 2.118526  | 0.064010  |
| 1  | 2.484320  | 1.415395  | 0.748347  |
| 1  | 2.522066  | 3.109838  | 0.158733  |
| 1  | 4.031327  | 2.196485  | 0.363572  |
| 8  | 2.956619  | 1.653803  | -1.270822 |
| 1  | 2.027950  | 1.628352  | -1.554184 |

---

Cartesian coordinates of : Ca8

---

## Atomic number (AN) and Cartesian coordinates

| AN | X         | Y         | Z         |
|----|-----------|-----------|-----------|
| 6  | -0.723285 | -0.855868 | 2.268363  |
| 1  | -0.267640 | -1.851344 | 2.188027  |
| 1  | -1.805399 | -0.946639 | 2.101725  |
| 1  | -0.552342 | -0.475549 | 3.277899  |
| 8  | -0.139724 | 0.059168  | 1.365275  |
| 1  | -0.428539 | -0.146744 | 0.461341  |
| 6  | -0.118877 | 0.993414  | -2.456889 |
| 1  | 0.570633  | 0.924462  | -3.306713 |
| 1  | -0.192839 | 2.039268  | -2.134105 |
| 1  | -1.108578 | 0.660410  | -2.775259 |
| 8  | 0.285268  | 0.146177  | -1.395850 |
| 1  | 1.140315  | 0.439488  | -1.030066 |
| 6  | 3.861002  | 0.721001  | 0.100909  |
| 1  | 4.214519  | 0.019694  | -0.665054 |
| 1  | 4.397623  | 0.526627  | 1.036217  |
| 1  | 4.091115  | 1.737934  | -0.226598 |
| 8  | 2.461117  | 0.631763  | 0.285301  |
| 1  | 2.238328  | -0.263154 | 0.636328  |
| 6  | -3.716221 | -0.814781 | -0.419799 |
| 1  | -4.368452 | -0.136123 | -0.982714 |
| 1  | -3.928278 | -0.697593 | 0.652481  |
| 1  | -3.956388 | -1.840864 | -0.709671 |
| 8  | -2.353599 | -0.582557 | -0.711181 |
| 1  | -2.179637 | 0.385328  | -0.626832 |
| 6  | -2.678368 | 2.206850  | 1.060978  |
| 1  | -2.522112 | 3.220886  | 1.443108  |
| 1  | -2.299690 | 1.488136  | 1.798415  |
| 1  | -3.749466 | 2.048615  | 0.912540  |
| 8  | -2.037195 | 2.033473  | -0.193586 |
| 1  | -1.087913 | 2.251022  | -0.057499 |
| 6  | 1.489027  | 3.379129  | -0.174092 |
| 1  | 1.875290  | 2.802112  | -1.024596 |
| 1  | 2.327642  | 3.639544  | 0.481676  |
| 1  | 1.033386  | 4.299018  | -0.546531 |
| 8  | 0.491824  | 2.668540  | 0.530465  |
| 1  | 0.868157  | 1.841125  | 0.880435  |
| 6  | -1.350945 | -3.388226 | -0.075749 |
| 1  | -1.933250 | -3.796747 | -0.910012 |
| 1  | -2.029621 | -2.875527 | 0.615803  |
| 1  | -0.864878 | -4.213546 | 0.449674  |
| 8  | -0.334230 | -2.522279 | -0.540369 |
| 1  | -0.746405 | -1.734100 | -0.937856 |
| 6  | 2.857162  | -2.622934 | -0.288437 |
| 1  | 2.599376  | -3.679848 | -0.415661 |
| 1  | 3.888443  | -2.554139 | 0.066249  |
| 1  | 2.775850  | -2.124019 | -1.263076 |
| 8  | 2.024445  | -2.005414 | 0.678562  |
| 1  | 1.100534  | -2.130213 | 0.369681  |

Cartesian coordinates of : DC8\_2

## Atomic number (AN) and Cartesian coordinates

| AN | X         | Y         | Z         |
|----|-----------|-----------|-----------|
| 8  | 3.587318  | -0.010905 | 1.125562  |
| 1  | 3.195238  | -0.771725 | 0.640108  |
| 8  | -2.475551 | -2.063625 | 0.147998  |
| 1  | -3.091197 | -1.326408 | -0.090405 |
| 8  | -3.852285 | 0.143622  | -0.422897 |
| 1  | -3.153825 | 0.517043  | -1.004053 |
| 6  | 4.980062  | 0.032539  | 0.876465  |

|   |           |           |           |
|---|-----------|-----------|-----------|
| 1 | 5.196829  | 0.154707  | -0.192696 |
| 1 | 5.387892  | 0.890686  | 1.413775  |
| 1 | 5.475894  | -0.874565 | 1.239343  |
| 6 | -2.959828 | -2.742318 | 1.293707  |
| 1 | -3.023823 | -2.074533 | 2.162210  |
| 1 | -3.946122 | -3.178792 | 1.104078  |
| 1 | -2.260646 | -3.549058 | 1.523234  |
| 6 | -3.860275 | 0.902209  | 0.780570  |
| 1 | -2.843319 | 1.047380  | 1.167441  |
| 1 | -4.327541 | 1.880446  | 0.621427  |
| 1 | -4.455569 | 0.353355  | 1.514226  |
| 8 | -1.521016 | 0.833075  | -1.629482 |
| 1 | -1.008162 | 0.871233  | -0.796352 |
| 6 | -1.091906 | -0.247432 | -2.440153 |
| 1 | -1.589156 | -0.143528 | -3.406641 |
| 1 | -0.007629 | -0.219474 | -2.599809 |
| 1 | -1.361210 | -1.218010 | -2.005372 |
| 8 | -0.690665 | 2.031429  | 0.707497  |
| 1 | 0.286858  | 2.027605  | 0.786599  |
| 6 | -1.085327 | 3.310388  | 0.242082  |
| 1 | -0.836380 | 4.093342  | 0.966955  |
| 1 | -0.620333 | 3.551257  | -0.721737 |
| 1 | -2.168715 | 3.291366  | 0.101058  |
| 8 | -0.064867 | -0.945510 | 0.316692  |
| 1 | -0.928540 | -1.415436 | 0.210681  |
| 6 | 0.116107  | -0.676378 | 1.704517  |
| 1 | -0.689184 | -0.038780 | 2.081581  |
| 1 | 0.164701  | -1.606975 | 2.282497  |
| 1 | 1.064704  | -0.145053 | 1.820268  |
| 8 | 2.329423  | -1.947778 | -0.288930 |
| 1 | 1.385986  | -1.687489 | -0.166570 |
| 6 | 2.606058  | -2.119064 | -1.665781 |
| 1 | 1.910275  | -2.830329 | -2.124438 |
| 1 | 2.554858  | -1.168681 | -2.213959 |
| 1 | 3.618399  | -2.518487 | -1.755453 |
| 6 | 1.881770  | 1.523341  | -1.014750 |
| 1 | 1.217760  | 2.185905  | -1.576664 |
| 1 | 2.859083  | 1.499199  | -1.512245 |
| 1 | 1.448514  | 0.514934  | -1.012237 |
| 8 | 1.990607  | 2.029857  | 0.306314  |
| 1 | 2.600695  | 1.427843  | 0.781183  |

-----  
Cartesian coordinates of : BDC8

-----  
Atomic number (AN) and Cartesian coordinates

| AN | X         | Y         | Z         |
|----|-----------|-----------|-----------|
| 8  | -0.432810 | -1.877476 | -0.055606 |
| 1  | 0.290809  | -1.331759 | 0.308848  |
| 8  | -4.045700 | 0.236083  | 1.473262  |
| 1  | -3.706816 | 0.971021  | 0.940215  |
| 8  | 2.191902  | -1.310377 | 0.751639  |
| 1  | 2.523896  | -0.390595 | 0.733440  |
| 6  | 0.113977  | -3.100373 | -0.511052 |
| 1  | 0.544517  | -3.668543 | 0.320393  |
| 1  | -0.698407 | -3.682034 | -0.952022 |
| 1  | 0.886769  | -2.935935 | -1.272427 |
| 6  | -2.935307 | -0.370500 | 2.100853  |
| 1  | -2.215293 | -0.781059 | 1.376719  |
| 1  | -2.407890 | 0.329876  | 2.764167  |
| 1  | -3.312891 | -1.194842 | 2.710118  |
| 6  | 3.250542  | -2.124492 | 0.285938  |
| 1  | 3.472921  | -1.934021 | -0.773564 |
| 1  | 4.164501  | -1.965236 | 0.870827  |



|   |           |           |           |
|---|-----------|-----------|-----------|
| 1 | 2.950227  | -3.168529 | 0.396392  |
| 8 | 3.426216  | 1.112139  | 0.374821  |
| 1 | 2.915181  | 1.454424  | -0.389591 |
| 6 | 4.818875  | 1.184678  | 0.133647  |
| 1 | 5.326948  | 0.791976  | 1.016628  |
| 1 | 5.112525  | 0.584579  | -0.736511 |
| 1 | 5.141585  | 2.219848  | -0.021395 |
| 8 | 1.423724  | 1.627376  | -1.330512 |
| 1 | 0.930612  | 1.506637  | -0.490113 |
| 6 | 1.144391  | 0.481819  | -2.124644 |
| 1 | 1.528624  | -0.432897 | -1.651179 |
| 1 | 0.066095  | 0.363196  | -2.287202 |
| 1 | 1.633867  | 0.620836  | -3.090486 |
| 8 | 0.099274  | 0.812167  | 0.861327  |
| 1 | -0.834750 | 1.080156  | 0.722269  |
| 6 | 0.469420  | 0.892303  | 2.232031  |
| 1 | 0.006174  | 1.758259  | 2.716267  |
| 1 | 0.178936  | -0.021851 | 2.761651  |
| 1 | 1.555103  | 1.001468  | 2.276513  |
| 8 | -2.255257 | 1.634401  | -0.174263 |
| 1 | -2.284223 | 0.848853  | -0.790324 |
| 6 | -1.946346 | 2.813391  | -0.907168 |
| 1 | -0.973562 | 2.727457  | -1.405838 |
| 1 | -2.719459 | 3.023198  | -1.653439 |
| 1 | -1.907460 | 3.643578  | -0.199402 |
| 6 | -3.424753 | -1.304231 | -1.475027 |
| 1 | -4.152569 | -0.782250 | -2.099109 |
| 1 | -3.292287 | -2.318165 | -1.867269 |
| 1 | -3.805858 | -1.344242 | -0.448977 |
| 8 | -2.201216 | -0.577205 | -1.545898 |
| 1 | -1.511683 | -1.065845 | -1.031231 |

-----  
Cartesian coordinates of : BC8\_11

-----  
Atomic number (AN) and Cartesian coordinates

| AN | X         | Y         | Z         |
|----|-----------|-----------|-----------|
| 8  | -2.859930 | 0.983107  | -0.283119 |
| 1  | -2.077951 | 1.504631  | -0.538346 |
| 8  | 2.337662  | 1.076680  | 1.392445  |
| 1  | 1.848592  | 0.250166  | 1.230424  |
| 8  | 2.062298  | -1.632094 | 0.636039  |
| 1  | 1.140121  | -1.903305 | 0.450023  |
| 6  | -3.852703 | 1.838952  | 0.249509  |
| 1  | -4.216826 | 2.548384  | -0.502299 |
| 1  | -4.687962 | 1.212775  | 0.570011  |
| 1  | -3.484333 | 2.397537  | 1.119232  |
| 6  | 3.706519  | 0.744117  | 1.428483  |
| 1  | 3.924665  | 0.002563  | 2.206519  |
| 1  | 4.053466  | 0.337801  | 0.466034  |
| 1  | 4.266920  | 1.657316  | 1.644269  |
| 6  | 2.929290  | -2.632708 | 0.150517  |
| 1  | 2.731466  | -3.604175 | 0.617964  |
| 1  | 2.846616  | -2.750647 | -0.939597 |
| 1  | 3.952904  | -2.331672 | 0.389694  |
| 8  | -0.255913 | -2.634341 | -0.464278 |
| 1  | -1.048678 | -2.388215 | 0.059697  |
| 6  | -0.290347 | -1.841785 | -1.630227 |
| 1  | 0.617802  | -2.055691 | -2.205018 |
| 1  | -1.160298 | -2.078781 | -2.255852 |
| 1  | -0.314722 | -0.769602 | -1.384509 |
| 8  | -0.262461 | -0.052196 | 0.985048  |
| 1  | -0.251671 | 0.738835  | 0.418127  |
| 6  | -0.712708 | 0.327584  | 2.274895  |

|   |           |           |           |
|---|-----------|-----------|-----------|
| 1 | -0.007222 | 1.017887  | 2.753260  |
| 1 | -1.707637 | 0.791550  | 2.227182  |
| 1 | -0.786391 | -0.582101 | 2.873356  |
| 8 | -0.392711 | 2.180791  | -0.714117 |
| 1 | 0.176236  | 1.905213  | -1.465201 |
| 6 | 0.232295  | 3.243242  | 0.009339  |
| 1 | 1.135590  | 2.883813  | 0.513751  |
| 1 | 0.468705  | 4.076954  | -0.658918 |
| 1 | -0.484701 | 3.586838  | 0.758375  |
| 8 | 1.324712  | 1.217003  | -2.581307 |
| 1 | 0.995245  | 0.502474  | -3.137631 |
| 6 | 2.427790  | 0.743147  | -1.798524 |
| 1 | 2.138702  | -0.096373 | -1.155230 |
| 1 | 3.263878  | 0.461299  | -2.446344 |
| 1 | 2.729620  | 1.571043  | -1.155293 |
| 6 | -3.797774 | -2.019514 | -0.086565 |
| 1 | -3.863841 | -3.109518 | -0.090941 |
| 1 | -4.670421 | -1.620466 | 0.445011  |
| 1 | -3.817759 | -1.654748 | -1.120166 |
| 8 | -2.593331 | -1.665260 | 0.565711  |
| 1 | -2.446886 | -0.709516 | 0.436483  |

-----  
Cartesian coordinates of : BL8\_6

-----  
Atomic number (AN) and Cartesian coordinates

| AN | X         | Y         | Z         |
|----|-----------|-----------|-----------|
| 8  | 0.901831  | 1.315445  | -1.465580 |
| 1  | 0.844304  | 0.403881  | -1.114075 |
| 8  | -3.013177 | -0.395415 | 2.008173  |
| 1  | -3.425478 | -0.191133 | 1.158048  |
| 8  | 4.469721  | -0.650290 | 1.125901  |
| 1  | 3.648156  | -0.770499 | 1.629937  |
| 6  | 0.735796  | 1.258060  | -2.870673 |
| 1  | -0.078682 | 0.577855  | -3.151601 |
| 1  | 0.488737  | 2.262283  | -3.221736 |
| 1  | 1.658149  | 0.931483  | -3.365567 |
| 6  | -1.688425 | 0.107114  | 1.982638  |
| 1  | -1.047451 | -0.473634 | 1.300057  |
| 1  | -1.650366 | 1.162468  | 1.684590  |
| 1  | -1.274899 | 0.004147  | 2.988052  |
| 6  | 4.155035  | -0.882525 | -0.224376 |
| 1  | 3.860899  | -1.926628 | -0.407308 |
| 1  | 3.344512  | -0.225679 | -0.581683 |
| 1  | 5.048546  | -0.670460 | -0.816304 |
| 8  | 1.735301  | -0.593452 | 1.737242  |
| 1  | 1.373415  | -0.978294 | 0.920930  |
| 6  | 1.639200  | 0.820837  | 1.642118  |
| 1  | 1.875104  | 1.228300  | 2.627378  |
| 1  | 2.353017  | 1.228795  | 0.913676  |
| 1  | 0.628087  | 1.141134  | 1.361790  |
| 8  | 0.573662  | -1.298113 | -0.755352 |
| 1  | -0.364694 | -1.600400 | -0.617184 |
| 6  | 1.172181  | -2.145397 | -1.731477 |
| 1  | 1.523255  | -3.077113 | -1.275841 |
| 1  | 0.458459  | -2.378863 | -2.527643 |
| 1  | 2.028366  | -1.619252 | -2.160636 |
| 8  | -1.833163 | -2.264216 | -0.496866 |
| 1  | -2.603883 | -1.676485 | -0.580672 |
| 6  | -1.973728 | -3.136344 | 0.626880  |
| 1  | -2.307777 | -2.584010 | 1.509139  |
| 1  | -2.678606 | -3.940643 | 0.395887  |
| 1  | -0.990515 | -3.572549 | 0.816135  |
| 8  | -3.522645 | -0.063380 | -0.818352 |

|   |           |          |           |
|---|-----------|----------|-----------|
| 1 | -4.391707 | 0.143556 | -1.178486 |
| 6 | -2.579724 | 0.952867 | -1.193138 |
| 1 | -2.589607 | 1.111594 | -2.275499 |
| 1 | -2.768190 | 1.890508 | -0.666120 |
| 1 | -1.593495 | 0.590079 | -0.893837 |
| 6 | 0.048242  | 3.971581 | 0.744982  |
| 1 | -0.644673 | 4.525964 | 1.381356  |
| 1 | 0.837999  | 3.548921 | 1.380900  |
| 1 | 0.508727  | 4.673531 | 0.038704  |
| 8 | -0.690830 | 2.966224 | 0.083403  |
| 1 | -0.086770 | 2.449562 | -0.482652 |

-----  
Cartesian coordinates of : BC8\_12

-----  
Atomic number (AN) and Cartesian coordinates

| AN | X         | Y         | Z         |
|----|-----------|-----------|-----------|
| 8  | -0.348064 | -1.730458 | 1.786077  |
| 1  | -1.304553 | -1.874818 | 1.792438  |
| 8  | 1.617726  | -1.281099 | -2.402132 |
| 1  | 1.568214  | -1.948914 | -1.696756 |
| 8  | 2.806904  | 1.202840  | 1.203153  |
| 1  | 2.063926  | 1.642421  | 0.749092  |
| 6  | -0.127247 | -0.350867 | 1.510020  |
| 1  | -0.561687 | 0.284280  | 2.291694  |
| 1  | 0.950231  | -0.179597 | 1.488411  |
| 1  | -0.546361 | -0.070175 | 0.535344  |
| 6  | 1.401520  | -0.030610 | -1.789606 |
| 1  | 0.327835  | 0.187909  | -1.667597 |
| 1  | 1.866286  | 0.026433  | -0.797003 |
| 1  | 1.834377  | 0.747434  | -2.425293 |
| 6  | 4.001544  | 1.427129  | 0.485775  |
| 1  | 3.976814  | 0.964163  | -0.510690 |
| 1  | 4.216084  | 2.496813  | 0.369291  |
| 1  | 4.816318  | 0.973231  | 1.054898  |
| 8  | 0.534924  | 2.421005  | 0.183799  |
| 1  | -0.203565 | 2.026621  | -0.323998 |
| 6  | -0.020136 | 3.284406  | 1.158627  |
| 1  | 0.783159  | 3.579214  | 1.837430  |
| 1  | -0.445416 | 4.184690  | 0.699408  |
| 1  | -0.803381 | 2.782274  | 1.740705  |
| 8  | -1.758670 | 1.598348  | -1.047817 |
| 1  | -1.998015 | 0.647122  | -1.128755 |
| 6  | -1.848363 | 2.205809  | -2.328378 |
| 1  | -1.168988 | 1.728205  | -3.044521 |
| 1  | -2.871483 | 2.159440  | -2.715489 |
| 1  | -1.559459 | 3.253134  | -2.217697 |
| 8  | -2.425839 | -1.009341 | -1.179222 |
| 1  | -2.789524 | -1.311398 | -0.331545 |
| 6  | -1.430404 | -1.931741 | -1.625316 |
| 1  | -0.633364 | -2.045183 | -0.882391 |
| 1  | -1.877790 | -2.907711 | -1.837855 |
| 1  | -0.991144 | -1.533560 | -2.540740 |
| 8  | -3.194537 | -1.237425 | 1.514145  |
| 1  | -3.840782 | -1.780428 | 1.979148  |
| 6  | -3.480553 | 0.149873  | 1.740325  |
| 1  | -4.527245 | 0.371622  | 1.515367  |
| 1  | -3.251756 | 0.427546  | 2.773240  |
| 1  | -2.845389 | 0.721259  | 1.060704  |
| 6  | 2.885724  | -2.271790 | 0.603956  |
| 1  | 3.626136  | -2.330178 | -0.197573 |
| 1  | 2.872825  | -1.247020 | 0.996217  |
| 1  | 3.177910  | -2.964813 | 1.400882  |
| 8  | 1.632151  | -2.637553 | 0.041464  |

1      0.930522      -2.513810      0.705486

-----

Cartesian coordinates of :      BL8\_5

-----

Atomic number (AN) and Cartesian coordinates

| AN | X         | Y         | Z         |
|----|-----------|-----------|-----------|
| 8  | 0.966700  | 0.361663  | 0.057755  |
| 1  | 1.220711  | -0.479768 | -0.352318 |
| 8  | 0.193134  | 3.272743  | 1.057162  |
| 1  | -0.301194 | 2.968153  | 0.271005  |
| 8  | -4.566209 | -0.175955 | -0.852827 |
| 1  | -3.599560 | -0.267070 | -0.812988 |
| 6  | 1.313190  | 0.272750  | 1.431525  |
| 1  | 2.391158  | 0.099427  | 1.561231  |
| 1  | 1.038419  | 1.224660  | 1.890695  |
| 1  | 0.764195  | -0.539414 | 1.927702  |
| 6  | 1.501999  | 3.576462  | 0.633652  |
| 1  | 1.963021  | 2.724680  | 0.113939  |
| 1  | 1.526683  | 4.446879  | -0.035376 |
| 1  | 2.095758  | 3.812066  | 1.522114  |
| 6  | -5.113747 | -1.195219 | -0.049719 |
| 1  | -4.927833 | -2.195084 | -0.465397 |
| 1  | -4.718031 | -1.168888 | 0.976321  |
| 1  | -6.193870 | -1.038437 | -0.003532 |
| 8  | -1.941267 | -0.351392 | -0.002282 |
| 1  | -1.241646 | -1.030156 | 0.034954  |
| 6  | -2.034280 | 0.295541  | 1.259711  |
| 1  | -3.031276 | 0.740351  | 1.327187  |
| 1  | -1.913771 | -0.420708 | 2.082228  |
| 1  | -1.282020 | 1.087590  | 1.359510  |
| 8  | -0.252219 | -2.494340 | 0.391094  |
| 1  | 0.713361  | -2.558922 | 0.298611  |
| 6  | -0.725729 | -3.273799 | 1.474610  |
| 1  | -0.500045 | -4.336087 | 1.332822  |
| 1  | -0.302460 | -2.938720 | 2.429540  |
| 1  | -1.810306 | -3.149504 | 1.508825  |
| 8  | 2.304400  | -2.095036 | -0.518709 |
| 1  | 3.152123  | -1.723267 | -0.207692 |
| 6  | 2.430094  | -2.457211 | -1.889511 |
| 1  | 2.755866  | -1.602785 | -2.492427 |
| 1  | 3.138950  | -3.281401 | -2.015030 |
| 1  | 1.444658  | -2.778731 | -2.230841 |
| 8  | 4.518993  | -0.590110 | -0.025953 |
| 1  | 5.426613  | -0.699955 | 0.274218  |
| 6  | 4.271906  | 0.770064  | -0.387831 |
| 1  | 4.447592  | 1.440322  | 0.459601  |
| 1  | 4.895851  | 1.070047  | -1.235043 |
| 1  | 3.218084  | 0.834392  | -0.667170 |
| 6  | -2.299134 | 2.237421  | -1.547252 |
| 1  | -2.436906 | 3.247815  | -1.936753 |
| 1  | -2.568926 | 1.517808  | -2.327651 |
| 1  | -2.972112 | 2.091496  | -0.694529 |
| 8  | -0.935282 | 2.114935  | -1.177527 |
| 1  | -0.764876 | 1.207097  | -0.874572 |

-----

Cartesian coordinates of :      BC8\_10

-----

Atomic number (AN) and Cartesian coordinates

| AN | X         | Y        | Z         |
|----|-----------|----------|-----------|
| 1  | -3.816705 | 2.177769 | -0.863154 |

|   |           |           |           |
|---|-----------|-----------|-----------|
| 6 | -2.771994 | 2.471794  | -0.994715 |
| 1 | -2.510250 | 2.402800  | -2.056142 |
| 1 | -2.629311 | 3.500232  | -0.659212 |
| 8 | -1.924505 | 1.646628  | -0.202640 |
| 1 | -2.121761 | 0.695382  | -0.344117 |
| 1 | 1.166355  | 0.506129  | 1.832208  |
| 6 | 0.710844  | 1.470323  | 1.582716  |
| 1 | -0.295155 | 1.511954  | 2.009974  |
| 1 | 1.308916  | 2.283096  | 2.007310  |
| 8 | 0.643930  | 1.615122  | 0.163050  |
| 1 | -0.310453 | 1.742836  | -0.088521 |
| 1 | -0.449048 | -1.274310 | 1.146218  |
| 6 | -1.545546 | -1.297522 | 1.164429  |
| 1 | -1.875539 | -2.269660 | 1.547578  |
| 1 | -1.910818 | -0.512688 | 1.832768  |
| 8 | -2.087916 | -1.056555 | -0.131920 |
| 1 | -1.506268 | -1.526175 | -0.781708 |
| 1 | 3.133709  | 0.870227  | -2.087602 |
| 6 | 2.509061  | 0.003190  | -2.320612 |
| 1 | 1.829309  | 0.255398  | -3.141061 |
| 1 | 3.137601  | -0.834478 | -2.627293 |
| 8 | 1.774090  | -0.413670 | -1.169640 |
| 1 | 1.331526  | 0.362308  | -0.743886 |
| 1 | 0.595495  | -3.395672 | 0.017035  |
| 6 | 0.148216  | -3.520910 | -0.975061 |
| 1 | 0.850806  | -4.048423 | -1.629129 |
| 1 | -0.762744 | -4.117585 | -0.892807 |
| 8 | -0.217353 | -2.265651 | -1.538766 |
| 1 | 0.538780  | -1.646175 | -1.477612 |
| 6 | 3.057898  | -1.668101 | 2.126880  |
| 1 | 3.296319  | -0.628903 | 2.393881  |
| 1 | 3.954015  | -2.135157 | 1.700959  |
| 1 | 2.789689  | -2.204307 | 3.039070  |
| 8 | 1.952374  | -1.747895 | 1.249668  |
| 1 | 2.173408  | -1.341742 | 0.394350  |
| 6 | -4.771506 | 0.396316  | 1.098885  |
| 1 | -3.906424 | 1.023382  | 1.361036  |
| 1 | -4.829519 | -0.441425 | 1.806267  |
| 1 | -5.677787 | 0.996336  | 1.207143  |
| 8 | -4.713507 | -0.044589 | -0.241678 |
| 1 | -3.950166 | -0.636084 | -0.329462 |
| 6 | 3.856262  | 1.814026  | 0.411898  |
| 1 | 3.502085  | 0.776206  | 0.315576  |
| 1 | 3.752838  | 2.122064  | 1.461358  |
| 1 | 4.916987  | 1.839232  | 0.152519  |
| 8 | 3.183652  | 2.684997  | -0.470324 |
| 1 | 2.228581  | 2.585635  | -0.332074 |

-----

Cartesian coordinates of : BC8\_2

-----

Atomic number (AN) and Cartesian coordinates

| AN | X        | Y         | Z         |
|----|----------|-----------|-----------|
| 1  | 1.742670 | -4.582037 | 0.740060  |
| 6  | 2.130009 | -3.560095 | 0.665117  |
| 1  | 2.077096 | -3.087971 | 1.654623  |
| 1  | 3.176469 | -3.604946 | 0.356854  |
| 8  | 1.421808 | -2.817249 | -0.307641 |
| 1  | 0.465028 | -2.762057 | -0.059662 |
| 1  | 0.073503 | -0.265906 | -0.539670 |
| 6  | 0.629516 | 0.026218  | -1.440971 |
| 1  | 0.095250 | -0.359363 | -2.316389 |
| 1  | 0.651358 | 1.119629  | -1.493040 |
| 8  | 1.968831 | -0.441670 | -1.405695 |

|   |           |           |           |
|---|-----------|-----------|-----------|
| 1 | 1.945384  | -1.369411 | -1.078496 |
| 1 | -2.033601 | -1.425143 | -1.290282 |
| 6 | -1.872603 | -2.474105 | -1.014102 |
| 1 | -2.839379 | -2.985215 | -0.938203 |
| 1 | -1.279142 | -2.963547 | -1.791450 |
| 8 | -1.157062 | -2.577516 | 0.213220  |
| 1 | -1.445473 | -1.833339 | 0.786374  |
| 1 | -1.066624 | 3.916505  | 1.454359  |
| 6 | -1.595583 | 2.963087  | 1.549808  |
| 1 | -1.562052 | 2.637694  | 2.595764  |
| 1 | -2.638088 | 3.105369  | 1.255295  |
| 8 | -1.031780 | 1.980051  | 0.693275  |
| 1 | -0.079856 | 1.810006  | 0.965944  |
| 1 | -3.753974 | -0.117597 | 0.103904  |
| 6 | -3.571589 | -0.395948 | 1.147181  |
| 1 | -4.097781 | 0.297453  | 1.813422  |
| 1 | -3.951924 | -1.404149 | 1.327828  |
| 8 | -2.177517 | -0.410169 | 1.433364  |
| 1 | -1.780438 | 0.430487  | 1.125204  |
| 6 | -2.251044 | 1.606524  | -2.794865 |
| 1 | -1.227343 | 1.729461  | -3.173080 |
| 1 | -2.729773 | 2.592682  | -2.748982 |
| 1 | -2.805770 | 0.987643  | -3.503259 |
| 8 | -2.277313 | 0.948541  | -1.545673 |
| 1 | -1.781542 | 1.466168  | -0.887029 |
| 6 | 1.254868  | 0.036389  | 2.050461  |
| 1 | 1.953947  | -0.110569 | 2.879886  |
| 1 | 1.501011  | -0.663020 | 1.241311  |
| 1 | 0.239030  | -0.171711 | 2.399415  |
| 8 | 1.295464  | 1.384778  | 1.595900  |
| 1 | 2.116037  | 1.506002  | 1.056549  |
| 6 | 3.971218  | 2.301364  | -0.791061 |
| 1 | 3.228756  | 2.780910  | -1.441035 |
| 1 | 4.783943  | 1.908689  | -1.411376 |
| 1 | 4.381564  | 3.052637  | -0.113624 |
| 8 | 3.393669  | 1.277358  | -0.003401 |
| 1 | 2.984158  | 0.591053  | -0.587413 |

-----  
 Cartesian coordinates of : BC8\_5

-----  
 Atomic number (AN) and Cartesian coordinates

| AN | X         | Y         | Z         |
|----|-----------|-----------|-----------|
| 1  | 1.743300  | -2.910749 | -2.439769 |
| 6  | 1.058466  | -2.517752 | -1.681982 |
| 1  | 0.411361  | -1.759042 | -2.135432 |
| 1  | 0.427107  | -3.329236 | -1.313701 |
| 8  | 1.783527  | -1.993815 | -0.576142 |
| 1  | 2.262814  | -1.166343 | -0.846161 |
| 1  | 1.325772  | -2.999300 | 2.672989  |
| 6  | 0.313593  | -2.881707 | 2.273655  |
| 1  | 0.040601  | -3.785883 | 1.717567  |
| 1  | -0.382703 | -2.754092 | 3.104789  |
| 8  | 0.222921  | -1.730723 | 1.444480  |
| 1  | 0.886729  | -1.813725 | 0.690948  |
| 1  | 4.708457  | 0.290316  | -0.079558 |
| 6  | 4.387720  | 0.304958  | -1.128132 |
| 1  | 4.790544  | 1.199681  | -1.615201 |
| 1  | 4.791999  | -0.576592 | -1.629505 |
| 8  | 2.975378  | 0.260791  | -1.240015 |
| 1  | 2.593520  | 0.987192  | -0.687748 |
| 1  | -1.755832 | 1.199788  | 2.587129  |
| 6  | -1.113956 | 1.250554  | 1.701997  |
| 1  | -1.496556 | 0.562363  | 0.942281  |

|   |           |           |           |
|---|-----------|-----------|-----------|
| 1 | -1.155653 | 2.261835  | 1.293370  |
| 8 | 0.239942  | 0.949261  | 2.035786  |
| 1 | 0.337589  | -0.022240 | 2.027378  |
| 1 | 3.400731  | 2.448231  | 1.907277  |
| 6 | 2.839593  | 2.982315  | 1.131245  |
| 1 | 2.268187  | 3.790811  | 1.599427  |
| 1 | 3.546206  | 3.421465  | 0.423460  |
| 8 | 1.987610  | 2.111409  | 0.409233  |
| 1 | 1.339352  | 1.692432  | 1.029688  |
| 6 | -4.618260 | 1.887484  | -0.879546 |
| 1 | -5.001874 | 0.908629  | -1.201009 |
| 1 | -4.558852 | 2.541486  | -1.758758 |
| 1 | -5.332524 | 2.321283  | -0.175966 |
| 8 | -3.378619 | 1.776798  | -0.217081 |
| 1 | -2.726068 | 1.394503  | -0.835689 |
| 6 | -0.172306 | 0.828183  | -1.483799 |
| 1 | 0.483566  | 0.646325  | -2.342800 |
| 1 | 0.231057  | 0.286497  | -0.615764 |
| 1 | -0.158086 | 1.895885  | -1.250256 |
| 8 | -1.507841 | 0.433715  | -1.760811 |
| 1 | -1.633955 | -0.479939 | -1.434668 |
| 6 | -3.195440 | -1.693957 | 0.207571  |
| 1 | -3.376339 | -0.654682 | 0.510387  |
| 1 | -3.360735 | -2.360523 | 1.061182  |
| 1 | -3.903551 | -1.959352 | -0.580073 |
| 8 | -1.887432 | -1.863548 | -0.328099 |
| 1 | -1.226514 | -1.788599 | 0.389341  |

-----  
Cartesian coordinates of : BL8\_4

-----  
Atomic number (AN) and Cartesian coordinates

| AN | X         | Y         | Z         |
|----|-----------|-----------|-----------|
| 8  | -3.964511 | -1.339704 | -1.812232 |
| 1  | -3.771539 | -1.494310 | -0.876891 |
| 8  | 4.306112  | -1.001894 | -0.377669 |
| 1  | 3.583430  | -0.621593 | -0.910674 |
| 8  | 2.109790  | 0.269656  | -1.504411 |
| 1  | 1.731068  | 0.455626  | -0.619026 |
| 6  | -4.681332 | -0.126327 | -1.916078 |
| 1  | -4.097106 | 0.730833  | -1.554002 |
| 1  | -4.906238 | 0.027392  | -2.973255 |
| 1  | -5.633532 | -0.162557 | -1.368537 |
| 6  | 4.623655  | -2.282439 | -0.875019 |
| 1  | 3.762938  | -2.965439 | -0.836137 |
| 1  | 4.988519  | -2.243778 | -1.909469 |
| 1  | 5.416612  | -2.694025 | -0.246701 |
| 6  | 2.413151  | 1.510537  | -2.114004 |
| 1  | 1.500713  | 2.067398  | -2.364229 |
| 1  | 3.045539  | 2.134003  | -1.469134 |
| 1  | 2.954438  | 1.304672  | -3.039127 |
| 8  | 1.437040  | 0.895306  | 1.049674  |
| 1  | 0.791824  | 1.628635  | 1.228710  |
| 6  | 2.677660  | 1.117209  | 1.718709  |
| 1  | 3.383028  | 0.361023  | 1.364646  |
| 1  | 3.073373  | 2.111693  | 1.484812  |
| 1  | 2.554274  | 1.025043  | 2.802508  |
| 8  | -0.467328 | 2.689586  | 1.294456  |
| 1  | -1.190157 | 2.113166  | 0.950243  |
| 6  | -0.339339 | 3.815174  | 0.441757  |
| 1  | -0.071434 | 3.518822  | -0.580744 |
| 1  | -1.268773 | 4.392362  | 0.410867  |
| 1  | 0.453832  | 4.448563  | 0.843691  |
| 8  | -2.097353 | 1.013564  | 0.031401  |

|   |           |           |           |
|---|-----------|-----------|-----------|
| 1 | -2.682202 | 0.360247  | 0.453038  |
| 6 | -1.248277 | 0.348340  | -0.906632 |
| 1 | -0.713914 | -0.483816 | -0.434948 |
| 1 | -1.824708 | -0.021845 | -1.759899 |
| 1 | -0.516699 | 1.082093  | -1.255285 |
| 8 | -3.629378 | -1.103755 | 1.056597  |
| 1 | -4.512655 | -1.003525 | 1.428724  |
| 6 | -2.841061 | -1.964539 | 1.895427  |
| 1 | -2.821221 | -1.586896 | 2.921405  |
| 1 | -3.242370 | -2.981622 | 1.880099  |
| 1 | -1.823984 | -1.959378 | 1.500302  |
| 6 | 1.356133  | -2.308669 | 0.604392  |
| 1 | 1.138766  | -3.379154 | 0.608663  |
| 1 | 1.323745  | -1.948659 | -0.434561 |
| 1 | 2.369938  | -2.149228 | 0.991884  |
| 8 | 0.380939  | -1.671072 | 1.412317  |
| 1 | 0.638461  | -0.734965 | 1.470658  |

-----  
Cartesian coordinates of : BC8\_4

-----  
Atomic number (AN) and Cartesian coordinates

| AN | X         | Y         | Z         |
|----|-----------|-----------|-----------|
| 8  | -4.430192 | -0.601284 | 0.403593  |
| 1  | -3.585042 | -0.991795 | 0.673600  |
| 8  | 0.484718  | -0.399877 | -1.387535 |
| 1  | 1.151021  | -1.035471 | -1.078668 |
| 8  | 2.729805  | -1.541141 | -0.155470 |
| 1  | 2.879167  | -0.585126 | 0.088787  |
| 6  | -4.695346 | 0.536548  | 1.199423  |
| 1  | -3.898120 | 1.285551  | 1.111282  |
| 1  | -5.632088 | 0.969787  | 0.841484  |
| 1  | -4.822831 | 0.274283  | 2.257731  |
| 6  | 1.105506  | 0.441821  | -2.341476 |
| 1  | 0.474752  | 1.326570  | -2.465088 |
| 1  | 2.095408  | 0.776931  | -2.006777 |
| 1  | 1.205619  | -0.056245 | -3.314533 |
| 6  | 3.900606  | -2.076777 | -0.748501 |
| 1  | 4.219445  | -1.473023 | -1.605573 |
| 1  | 4.721497  | -2.131153 | -0.025012 |
| 1  | 3.671444  | -3.086385 | -1.094153 |
| 8  | 2.983741  | 1.001274  | 0.371529  |
| 1  | 2.121528  | 1.458455  | 0.185318  |
| 6  | 3.419468  | 1.398740  | 1.661598  |
| 1  | 4.141227  | 0.661140  | 2.021946  |
| 1  | 3.908893  | 2.377925  | 1.621915  |
| 1  | 2.579768  | 1.447624  | 2.363632  |
| 8  | 0.668545  | 2.212245  | 0.188333  |
| 1  | -0.163978 | 1.687197  | 0.052253  |
| 6  | 0.435843  | 3.551705  | -0.197650 |
| 1  | 0.313107  | 3.642179  | -1.285059 |
| 1  | -0.457006 | 3.950929  | 0.296167  |
| 1  | 1.299637  | 4.148331  | 0.104748  |
| 8  | -1.692564 | 1.052833  | -0.091861 |
| 1  | -1.606984 | 0.084079  | 0.043314  |
| 6  | -2.319368 | 1.230179  | -1.355267 |
| 1  | -1.769141 | 0.697470  | -2.140513 |
| 1  | -3.351600 | 0.863442  | -1.322405 |
| 1  | -2.321662 | 2.300239  | -1.579497 |
| 8  | -1.848529 | -1.679201 | 0.191632  |
| 1  | -0.995476 | -2.013851 | 0.546149  |
| 6  | -2.115898 | -2.270826 | -1.076847 |
| 1  | -1.350833 | -1.979851 | -1.803501 |
| 1  | -2.162018 | -3.361626 | -0.993288 |



|   |           |           |           |
|---|-----------|-----------|-----------|
| 1 | -3.091326 | -1.901421 | -1.402276 |
| 6 | 0.588209  | -0.897178 | 2.047255  |
| 1 | -0.336135 | -0.784642 | 2.618004  |
| 1 | 1.436878  | -0.859984 | 2.739808  |
| 1 | 0.666615  | -0.069993 | 1.330268  |
| 8 | 0.529022  | -2.153425 | 1.383042  |
| 1 | 1.347759  | -2.238233 | 0.862618  |

-----  
Cartesian coordinates of : BC8\_9

-----  
Atomic number (AN) and Cartesian coordinates

| AN | X         | Y         | Z         |
|----|-----------|-----------|-----------|
| 8  | -2.969376 | -2.145395 | 0.167938  |
| 1  | -3.024474 | -1.428301 | 0.821142  |
| 8  | 2.255376  | 1.736563  | -0.707655 |
| 1  | 3.001272  | 1.103813  | -0.718197 |
| 8  | 4.192950  | -0.025992 | -0.031899 |
| 1  | 3.530520  | -0.666419 | 0.314798  |
| 6  | -1.593803 | -2.300591 | -0.154290 |
| 1  | -1.021779 | -2.711067 | 0.687585  |
| 1  | -1.533741 | -3.002798 | -0.989805 |
| 1  | -1.144498 | -1.344043 | -0.454314 |
| 6  | 2.279299  | 2.383202  | 0.560852  |
| 1  | 1.869828  | 1.732105  | 1.342513  |
| 1  | 3.299331  | 2.674808  | 0.827251  |
| 1  | 1.663564  | 3.283158  | 0.484380  |
| 6  | 5.342275  | -0.701944 | -0.498975 |
| 1  | 5.832160  | -1.258216 | 0.308080  |
| 1  | 5.104774  | -1.396813 | -1.314619 |
| 1  | 6.039056  | 0.049060  | -0.876012 |
| 8  | 2.098337  | -1.591307 | 0.505598  |
| 1  | 1.387925  | -1.105469 | 0.982054  |
| 6  | 1.655962  | -1.901669 | -0.805050 |
| 1  | 2.538638  | -2.073410 | -1.427489 |
| 1  | 1.048527  | -2.814536 | -0.810835 |
| 1  | 1.075372  | -1.080996 | -1.243499 |
| 8  | 0.164641  | -0.134049 | 1.707104  |
| 1  | -0.458842 | 0.266797  | 1.071995  |
| 6  | -0.530377 | -0.570003 | 2.860233  |
| 1  | -1.026417 | 0.268480  | 3.360460  |
| 1  | -1.283794 | -1.328894 | 2.617700  |
| 1  | 0.206059  | -1.004063 | 3.539321  |
| 8  | -2.547596 | 0.502232  | 0.995861  |
| 1  | -2.606089 | 0.550363  | 0.018898  |
| 6  | -3.428588 | 1.459468  | 1.558458  |
| 1  | -3.100965 | 2.481773  | 1.335007  |
| 1  | -4.452076 | 1.324955  | 1.191163  |
| 1  | -3.420589 | 1.318726  | 2.641353  |
| 8  | -3.223844 | 0.014255  | -1.615512 |
| 1  | -3.399870 | -0.878974 | -1.269865 |
| 6  | -2.480582 | -0.080331 | -2.821931 |
| 1  | -1.511120 | -0.562496 | -2.657566 |
| 1  | -3.046201 | -0.620155 | -3.589047 |
| 1  | -2.298779 | 0.937199  | -3.172597 |
| 6  | -0.892356 | 2.291181  | -0.872508 |
| 1  | -1.932333 | 2.205389  | -1.204172 |
| 1  | -0.880923 | 2.765002  | 0.119395  |
| 1  | -0.353490 | 2.934243  | -1.577671 |
| 8  | -0.328078 | 0.992758  | -0.829121 |
| 1  | 0.648681  | 1.112390  | -0.856645 |

-----  
Cartesian coordinates of : DC8\_1

-----  
Atomic number (AN) and Cartesian coordinates

| AN | X         | Y         | Z         |
|----|-----------|-----------|-----------|
| 8  | 0.983337  | -0.612296 | -1.584637 |
| 1  | 1.354511  | -1.079622 | -0.811395 |
| 8  | 2.451765  | -1.397145 | 0.627817  |
| 1  | 2.454955  | -0.464612 | 0.941716  |
| 8  | 2.323254  | 1.253350  | 1.121677  |
| 1  | 1.621038  | 1.561913  | 0.496760  |
| 6  | 2.070089  | 0.009986  | -2.244977 |
| 1  | 2.742386  | -0.728476 | -2.700131 |
| 1  | 1.661805  | 0.646930  | -3.033590 |
| 1  | 2.645451  | 0.646079  | -1.558837 |
| 6  | 3.781928  | -1.788952 | 0.344985  |
| 1  | 4.278149  | -1.081342 | -0.332550 |
| 1  | 4.375202  | -1.877172 | 1.262496  |
| 1  | 3.746383  | -2.766800 | -0.140157 |
| 6  | 3.451598  | 2.101132  | 1.016268  |
| 1  | 3.860396  | 2.109756  | -0.002330 |
| 1  | 3.203097  | 3.128601  | 1.304719  |
| 1  | 4.217341  | 1.725674  | 1.698504  |
| 8  | 0.419587  | 2.002397  | -0.595664 |
| 1  | 0.018510  | 1.171294  | -0.919536 |
| 6  | -0.607224 | 2.808464  | -0.037022 |
| 1  | -0.144518 | 3.737682  | 0.301478  |
| 1  | -1.371321 | 3.043795  | -0.785412 |
| 1  | -1.090212 | 2.316984  | 0.815613  |
| 8  | -1.736476 | 0.311752  | -1.280787 |
| 1  | -1.551986 | -0.618692 | -1.000616 |
| 6  | -1.782436 | 0.384213  | -2.696664 |
| 1  | -0.859544 | -0.018223 | -3.126887 |
| 1  | -2.641646 | -0.166956 | -3.094464 |
| 1  | -1.880381 | 1.437164  | -2.972696 |
| 8  | -1.560900 | -2.096153 | -0.137338 |
| 1  | -1.664887 | -1.804569 | 0.794803  |
| 6  | -0.506018 | -3.045590 | -0.209602 |
| 1  | 0.364713  | -2.722862 | 0.374229  |
| 1  | -0.841280 | -4.024124 | 0.151692  |
| 1  | -0.212020 | -3.133051 | -1.257401 |
| 8  | -1.546340 | -0.759708 | 2.219141  |
| 1  | -2.193019 | -0.081082 | 1.934763  |
| 6  | -0.242536 | -0.222125 | 2.038337  |
| 1  | -0.026700 | -0.056575 | 0.971939  |
| 1  | -0.114104 | 0.722212  | 2.577644  |
| 1  | 0.476734  | -0.947338 | 2.423891  |
| 6  | -4.450295 | 0.091084  | 0.721075  |
| 1  | -4.923644 | 0.002361  | 1.700624  |
| 1  | -5.161161 | 0.555926  | 0.029084  |
| 1  | -4.196604 | -0.911850 | 0.355727  |
| 8  | -3.288348 | 0.893740  | 0.877240  |
| 1  | -2.805315 | 0.880210  | 0.026330  |

-----  
Cartesian coordinates of : BC8\_1

-----  
Atomic number (AN) and Cartesian coordinates

| AN | X         | Y         | Z         |
|----|-----------|-----------|-----------|
| 8  | -1.536990 | -1.492567 | 1.658216  |
| 1  | -2.213765 | -1.370332 | 0.969404  |
| 8  | 2.616349  | 0.875524  | -0.280977 |
| 1  | 2.241925  | 0.055630  | 0.099027  |
| 8  | 1.840471  | -1.737330 | 0.354992  |

|   |           |           |           |
|---|-----------|-----------|-----------|
| 1 | 0.955175  | -1.695045 | -0.064881 |
| 6 | -1.055639 | -2.828211 | 1.634009  |
| 1 | -0.820245 | -3.154347 | 0.613707  |
| 1 | -0.136804 | -2.853889 | 2.223267  |
| 1 | -1.784617 | -3.516082 | 2.076604  |
| 6 | 3.748012  | 0.539837  | -1.055208 |
| 1 | 4.554895  | 0.140175  | -0.429085 |
| 1 | 3.506630  | -0.199590 | -1.830489 |
| 1 | 4.102044  | 1.450312  | -1.542972 |
| 6 | 2.532463  | -2.830534 | -0.216802 |
| 1 | 2.078056  | -3.786216 | 0.072521  |
| 1 | 2.549732  | -2.771638 | -1.312852 |
| 1 | 3.559613  | -2.806323 | 0.153904  |
| 8 | -0.256733 | -1.671241 | -1.360502 |
| 1 | -1.184075 | -1.462772 | -1.128071 |
| 6 | 0.205963  | -0.626264 | -2.205433 |
| 1 | 1.281829  | -0.762993 | -2.343343 |
| 1 | -0.282396 | -0.665284 | -3.185570 |
| 1 | 0.040643  | 0.357067  | -1.751776 |
| 8 | -2.704451 | -0.664643 | -0.681238 |
| 1 | -2.389241 | 0.287508  | -0.578290 |
| 6 | -3.837536 | -0.695053 | -1.534131 |
| 1 | -4.670814 | -0.132408 | -1.099523 |
| 1 | -3.600603 | -0.275573 | -2.517970 |
| 1 | -4.141385 | -1.736350 | -1.657106 |
| 8 | -1.953818 | 1.767839  | -0.360562 |
| 1 | -1.005518 | 2.008170  | -0.524617 |
| 6 | -2.348874 | 2.244065  | 0.918106  |
| 1 | -1.666595 | 1.885735  | 1.695610  |
| 1 | -2.381950 | 3.339093  | 0.929137  |
| 1 | -3.354454 | 1.864195  | 1.116948  |
| 8 | 0.562434  | 2.626102  | -0.775258 |
| 1 | 1.226450  | 1.913221  | -0.654691 |
| 6 | 0.771219  | 3.557608  | 0.273001  |
| 1 | 0.550693  | 3.106126  | 1.248710  |
| 1 | 1.803561  | 3.923844  | 0.273620  |
| 1 | 0.099317  | 4.403169  | 0.105752  |
| 6 | 1.076243  | 0.524699  | 2.412655  |
| 1 | 1.850663  | 1.287540  | 2.295844  |
| 1 | 0.458139  | 0.774100  | 3.285582  |
| 1 | 1.566593  | -0.442293 | 2.579653  |
| 8 | 0.309203  | 0.510939  | 1.221469  |
| 1 | -0.356312 | -0.198606 | 1.315653  |

-----

Cartesian coordinates of : BL8\_2

-----

Atomic number (AN) and Cartesian coordinates

| AN | X         | Y         | Z         |
|----|-----------|-----------|-----------|
| 8  | -0.507103 | -1.984664 | 1.256912  |
| 1  | 0.089319  | -1.250403 | 1.498078  |
| 8  | 4.580410  | 1.570101  | 0.457511  |
| 1  | 4.547205  | 0.602448  | 0.556028  |
| 8  | 3.735272  | -1.101651 | 0.427693  |
| 1  | 2.898212  | -0.880531 | 0.875697  |
| 6  | 0.172350  | -2.762186 | 0.285429  |
| 1  | 1.098598  | -3.182945 | 0.695492  |
| 1  | -0.484847 | -3.586123 | -0.001032 |
| 1  | 0.411642  | -2.167172 | -0.606148 |
| 6  | 3.770579  | 1.901812  | -0.643618 |
| 1  | 4.147274  | 1.472661  | -1.583487 |
| 1  | 2.730397  | 1.565674  | -0.508203 |
| 1  | 3.767076  | 2.990219  | -0.741732 |
| 6  | 3.433430  | -1.507616 | -0.896149 |

|   |           |           |           |
|---|-----------|-----------|-----------|
| 1 | 3.166334  | -2.570910 | -0.934637 |
| 1 | 2.606136  | -0.921013 | -1.318269 |
| 1 | 4.326795  | -1.353795 | -1.506694 |
| 8 | 1.338238  | 0.030426  | 1.235395  |
| 1 | 1.060801  | 0.298434  | 0.325267  |
| 6 | 1.568861  | 1.180890  | 2.047257  |
| 1 | 2.538159  | 1.634137  | 1.812804  |
| 1 | 0.769642  | 1.917434  | 1.909584  |
| 1 | 1.568779  | 0.852927  | 3.088312  |
| 8 | 0.402015  | 0.364208  | -1.222633 |
| 1 | -0.572328 | 0.175238  | -1.235814 |
| 6 | 0.722469  | 1.161830  | -2.350980 |
| 1 | 0.052647  | 0.929890  | -3.184802 |
| 1 | 0.644325  | 2.230199  | -2.117965 |
| 1 | 1.750344  | 0.942298  | -2.653337 |
| 8 | -2.148128 | -0.161523 | -1.523684 |
| 1 | -2.810857 | 0.220397  | -0.914284 |
| 6 | -2.433754 | -1.537414 | -1.712997 |
| 1 | -2.420729 | -2.080888 | -0.762333 |
| 1 | -3.409427 | -1.669578 | -2.192491 |
| 1 | -1.660389 | -1.945738 | -2.368028 |
| 8 | -4.221259 | 1.381407  | -0.473790 |
| 1 | -4.514262 | 1.981240  | -1.167260 |
| 6 | -5.296657 | 1.106466  | 0.418901  |
| 1 | -5.614029 | 2.014450  | 0.943495  |
| 1 | -6.152706 | 0.674885  | -0.110946 |
| 1 | -4.914810 | 0.380087  | 1.136122  |
| 6 | -2.069175 | 0.711731  | 1.661021  |
| 1 | -2.775818 | 1.536223  | 1.783519  |
| 1 | -1.523977 | 0.569266  | 2.603907  |
| 1 | -1.348801 | 0.992883  | 0.877827  |
| 8 | -2.805675 | -0.439401 | 1.303209  |
| 1 | -2.169482 | -1.176195 | 1.263243  |

-----  
Cartesian coordinates of : BL8\_1

-----  
Atomic number (AN) and Cartesian coordinates

| AN | X         | Y         | Z         |
|----|-----------|-----------|-----------|
| 8  | 1.251056  | 0.478179  | 2.316903  |
| 1  | 1.941312  | 0.280700  | 1.651482  |
| 8  | 2.916892  | 1.945163  | -1.300512 |
| 1  | 3.076023  | 1.175446  | -0.728568 |
| 8  | 2.912979  | -0.352161 | 0.313745  |
| 1  | 2.300784  | -0.879561 | -0.279268 |
| 6  | 0.607803  | -0.743429 | 2.636683  |
| 1  | 1.291875  | -1.431212 | 3.148662  |
| 1  | -0.219841 | -0.514053 | 3.312220  |
| 1  | 0.204831  | -1.243258 | 1.744216  |
| 6  | 2.688405  | 3.070445  | -0.475860 |
| 1  | 1.834354  | 2.923063  | 0.199801  |
| 1  | 3.571970  | 3.324417  | 0.123958  |
| 1  | 2.463610  | 3.915743  | -1.129849 |
| 6  | 4.054652  | -1.139141 | 0.618980  |
| 1  | 3.775257  | -2.038860 | 1.178729  |
| 1  | 4.580931  | -1.435874 | -0.294163 |
| 1  | 4.724572  | -0.534760 | 1.233442  |
| 8  | 1.401013  | -1.664915 | -1.315295 |
| 1  | 0.551495  | -2.026888 | -0.970740 |
| 6  | 1.143256  | -0.923566 | -2.503589 |
| 1  | 1.814231  | -0.059966 | -2.531800 |
| 1  | 1.314474  | -1.549191 | -3.385373 |
| 1  | 0.109384  | -0.560814 | -2.517763 |
| 8  | -0.962229 | -2.469635 | -0.402162 |

|   |           |           |           |
|---|-----------|-----------|-----------|
| 1 | -1.710775 | -1.829517 | -0.321927 |
| 6 | -1.484566 | -3.773439 | -0.587418 |
| 1 | -2.118095 | -4.065647 | 0.257380  |
| 1 | -2.069007 | -3.843589 | -1.511494 |
| 1 | -0.641706 | -4.464629 | -0.650043 |
| 8 | -3.049174 | -0.906462 | 0.053273  |
| 1 | -3.273146 | -0.113202 | -0.468953 |
| 6 | -2.984377 | -0.524838 | 1.424037  |
| 1 | -2.271705 | 0.294483  | 1.574134  |
| 1 | -3.973643 | -0.227242 | 1.789336  |
| 1 | -2.652334 | -1.399979 | 1.988252  |
| 8 | -3.739942 | 1.519574  | -1.084196 |
| 1 | -4.532961 | 1.612907  | -1.621721 |
| 6 | -3.569352 | 2.679260  | -0.263387 |
| 1 | -3.463435 | 3.576366  | -0.881023 |
| 1 | -4.415048 | 2.801680  | 0.421548  |
| 1 | -2.652748 | 2.532275  | 0.310672  |
| 6 | -0.365206 | 1.079273  | -0.305647 |
| 1 | -1.168803 | 1.266058  | -1.026143 |
| 1 | 0.591886  | 1.343975  | -0.774591 |
| 1 | -0.354635 | 0.003852  | -0.074638 |
| 8 | -0.630854 | 1.854006  | 0.849852  |
| 1 | 0.029280  | 1.589891  | 1.518579  |

-----

Cartesian coordinates of : BC8\_8

-----

Atomic number (AN) and Cartesian coordinates

| AN | X         | Y         | Z         |
|----|-----------|-----------|-----------|
| 1  | -3.136352 | 0.589641  | -1.893948 |
| 6  | -3.481002 | -0.031869 | -1.060547 |
| 1  | -4.494785 | 0.274533  | -0.782217 |
| 1  | -3.492311 | -1.078805 | -1.373577 |
| 8  | -2.604315 | 0.078651  | 0.055274  |
| 1  | -2.411869 | 1.036766  | 0.231247  |
| 1  | -1.167913 | -2.187508 | 2.052441  |
| 6  | -0.312363 | -1.761522 | 1.518409  |
| 1  | -0.026838 | -0.814763 | 1.989853  |
| 1  | 0.536026  | -2.445820 | 1.577204  |
| 8  | -0.632627 | -1.565476 | 0.140325  |
| 1  | -1.372760 | -0.885951 | 0.076287  |
| 1  | 1.134082  | -1.813063 | -2.879089 |
| 6  | 1.868038  | -1.936838 | -2.076753 |
| 1  | 1.834178  | -2.970447 | -1.714702 |
| 1  | 2.864260  | -1.732181 | -2.473902 |
| 8  | 1.625538  | -1.022928 | -1.015055 |
| 1  | 0.714048  | -1.191343 | -0.638362 |
| 1  | -2.446577 | 4.306156  | 1.595401  |
| 6  | -2.407324 | 3.214252  | 1.674901  |
| 1  | -1.679420 | 2.939422  | 2.446455  |
| 1  | -3.392703 | 2.849756  | 1.972473  |
| 8  | -2.086711 | 2.627448  | 0.425367  |
| 1  | -1.164396 | 2.887134  | 0.178837  |
| 1  | 4.265915  | 1.164557  | -0.257683 |
| 6  | 3.338968  | 1.461697  | 0.246406  |
| 1  | 3.097924  | 0.726670  | 1.022951  |
| 1  | 3.494365  | 2.436142  | 0.714377  |
| 8  | 2.279130  | 1.597927  | -0.689953 |
| 1  | 2.002774  | 0.702121  | -0.970828 |
| 1  | 0.527828  | 4.099302  | -2.049190 |
| 6  | 0.590606  | 4.449648  | -1.013047 |
| 1  | 1.562545  | 4.930298  | -0.857315 |
| 1  | -0.196256 | 5.187642  | -0.842568 |
| 8  | 0.396021  | 3.389787  | -0.092600 |

|   |           |           |           |
|---|-----------|-----------|-----------|
| 1 | 1.061083  | 2.684623  | -0.275108 |
| 6 | -3.427662 | -3.263518 | 0.348846  |
| 1 | -3.479458 | -2.242529 | 0.753526  |
| 1 | -3.047658 | -3.935479 | 1.130202  |
| 1 | -4.438287 | -3.583913 | 0.085898  |
| 8 | -2.644465 | -3.324626 | -0.826040 |
| 1 | -1.782076 | -2.930991 | -0.622562 |
| 6 | 4.366074  | -2.121987 | 1.044904  |
| 1 | 4.903295  | -1.190570 | 0.817723  |
| 1 | 4.532410  | -2.830826 | 0.222821  |
| 1 | 4.792751  | -2.547964 | 1.955080  |
| 8 | 2.993628  | -1.897787 | 1.282770  |
| 1 | 2.584569  | -1.555745 | 0.468854  |

-----  
Cartesian coordinates of : BC8\_7

-----  
Atomic number (AN) and Cartesian coordinates

| AN | X         | Y         | Z         |
|----|-----------|-----------|-----------|
| 1  | 0.280491  | 0.158525  | -0.484519 |
| 6  | -0.417801 | 0.427551  | -1.287436 |
| 1  | 0.156941  | 0.704954  | -2.175654 |
| 1  | -1.042470 | -0.438649 | -1.518722 |
| 8  | -1.274548 | 1.495259  | -0.879483 |
| 1  | -0.693000 | 2.259061  | -0.671082 |
| 1  | -4.229804 | 1.481889  | 1.180294  |
| 6  | -3.432226 | 1.079986  | 1.814833  |
| 1  | -2.930052 | 1.907219  | 2.327976  |
| 1  | -3.876179 | 0.420237  | 2.562401  |
| 8  | -2.513477 | 0.316782  | 1.049728  |
| 1  | -2.077608 | 0.888575  | 0.349553  |
| 1  | -0.900594 | -2.318891 | -0.115146 |
| 6  | -0.995678 | -2.585774 | 0.941912  |
| 1  | -2.020690 | -2.911668 | 1.140477  |
| 1  | -0.311817 | -3.407313 | 1.167197  |
| 8  | -0.641197 | -1.494672 | 1.794801  |
| 1  | -1.294328 | -0.774387 | 1.657754  |
| 1  | 1.921941  | 4.865601  | -0.116124 |
| 6  | 0.960781  | 4.450326  | 0.207370  |
| 1  | 0.928519  | 4.442476  | 1.303225  |
| 1  | 0.162297  | 5.096604  | -0.162496 |
| 8  | 0.755117  | 3.159081  | -0.330462 |
| 1  | 1.472045  | 2.549531  | -0.036769 |
| 1  | 2.396370  | -2.829248 | 2.080410  |
| 6  | 2.641981  | -1.762765 | 2.138669  |
| 1  | 2.522558  | -1.424461 | 3.172700  |
| 1  | 3.683341  | -1.624180 | 1.839272  |
| 8  | 1.828259  | -1.004973 | 1.254874  |
| 1  | 0.864235  | -1.114417 | 1.516493  |
| 1  | 2.644246  | 0.345566  | -1.476434 |
| 6  | 3.312991  | 0.974249  | -0.876774 |
| 1  | 4.226984  | 0.413916  | -0.646180 |
| 1  | 3.584484  | 1.861703  | -1.451925 |
| 8  | 2.679124  | 1.416042  | 0.317219  |
| 1  | 2.352359  | 0.625409  | 0.793003  |
| 6  | -3.879817 | -0.506425 | -1.928067 |
| 1  | -3.258551 | 0.395546  | -2.009870 |
| 1  | -4.899788 | -0.209502 | -1.648582 |
| 1  | -3.921810 | -0.991540 | -2.905533 |
| 8  | -3.335191 | -1.439648 | -1.014939 |
| 1  | -3.183824 | -0.975075 | -0.176583 |
| 6  | 2.611915  | -2.670464 | -1.875942 |
| 1  | 2.736402  | -3.591913 | -1.291847 |
| 1  | 3.559900  | -2.113786 | -1.858384 |

|   |          |           |           |
|---|----------|-----------|-----------|
| 1 | 2.397015 | -2.947449 | -2.909798 |
| 8 | 1.532251 | -1.890190 | -1.411569 |
| 1 | 1.694818 | -1.645894 | -0.483848 |

-----  
Cartesian coordinates of : BC8\_3

-----  
Atomic number (AN) and Cartesian coordinates

| AN | X         | Y         | Z         |
|----|-----------|-----------|-----------|
| 1  | 0.001207  | -0.056536 | -1.415037 |
| 6  | 0.824395  | -0.720574 | -1.711014 |
| 1  | 0.604306  | -1.145811 | -2.695974 |
| 1  | 1.744150  | -0.131705 | -1.770524 |
| 8  | 1.035540  | -1.748551 | -0.750034 |
| 1  | 0.196088  | -2.242189 | -0.666175 |
| 1  | 2.694219  | -1.540192 | 2.705227  |
| 6  | 2.059430  | -0.663664 | 2.533644  |
| 1  | 1.032693  | -0.891626 | 2.837355  |
| 1  | 2.440192  | 0.166266  | 3.133401  |
| 8  | 2.097029  | -0.264625 | 1.173343  |
| 1  | 1.635083  | -0.935301 | 0.610674  |
| 1  | 2.224187  | 2.125056  | -0.811732 |
| 6  | 1.806306  | 2.656557  | 0.049220  |
| 1  | 2.574893  | 2.727170  | 0.825771  |
| 1  | 1.513553  | 3.665356  | -0.249588 |
| 8  | 0.643525  | 2.007646  | 0.554433  |
| 1  | 0.901154  | 1.105337  | 0.838751  |
| 1  | -3.204911 | -3.650162 | -0.029613 |
| 6  | -2.212221 | -3.285872 | 0.258640  |
| 1  | -2.306826 | -2.587631 | 1.100011  |
| 1  | -1.609691 | -4.136679 | 0.580734  |
| 8  | -1.548674 | -2.686126 | -0.842222 |
| 1  | -2.042842 | -1.885232 | -1.094658 |
| 1  | -1.455252 | 4.093511  | -1.170866 |
| 6  | -2.085395 | 3.273012  | -0.810658 |
| 1  | -2.319964 | 3.445286  | 0.247433  |
| 1  | -3.015503 | 3.274411  | -1.383785 |
| 8  | -1.450103 | 2.022800  | -1.007035 |
| 1  | -0.631563 | 1.982370  | -0.436416 |
| 1  | -4.719406 | 0.338093  | -1.159603 |
| 6  | -4.082046 | 0.031839  | -0.322715 |
| 1  | -4.102107 | 0.811971  | 0.448195  |
| 1  | -4.485247 | -0.889304 | 0.105059  |
| 8  | -2.757448 | -0.225710 | -0.755049 |
| 1  | -2.304385 | 0.636919  | -0.961284 |
| 6  | 4.372019  | -0.964660 | -1.230366 |
| 1  | 3.528884  | -1.667648 | -1.262180 |
| 1  | 5.148943  | -1.375119 | -0.572087 |
| 1  | 4.790096  | -0.871716 | -2.235281 |
| 8  | 3.963674  | 0.325872  | -0.819203 |
| 1  | 3.486110  | 0.229140  | 0.021818  |
| 6  | -1.539239 | 0.531602  | 2.158845  |
| 1  | -2.441466 | 0.064934  | 2.576882  |
| 1  | -1.821904 | 1.437354  | 1.606700  |
| 1  | -0.884393 | 0.828306  | 2.981696  |
| 8  | -0.815661 | -0.370023 | 1.342048  |
| 1  | -1.372841 | -0.564352 | 0.571284  |

-----  
Cartesian coordinates of : BC8\_6

-----  
Atomic number (AN) and Cartesian coordinates

| AN | X | Y | Z |
|----|---|---|---|
|----|---|---|---|

```

-----
8   -1.900791    2.340491   -0.431199
1   -0.937347    2.442689   -0.296948
8    0.705937    2.472595    0.373367
1    1.512430    2.247062   -0.138461
8    3.021069    1.497540   -0.609715
1    2.999630    0.559839   -0.309435
6   -2.558989    3.400243    0.227840
1   -2.282544    4.376667   -0.187987
1   -3.634405    3.258821    0.092545
1   -2.344996    3.408788    1.306288
6    0.736473    1.700844    1.558396
1    0.610989    0.627304    1.352183
1    1.676504    1.845711    2.103758
1   -0.090394    2.030242    2.192851
6    4.216100    2.110780   -0.160097
1    4.298080    2.084731    0.933349
1    5.097317    1.624967   -0.593786
1    4.197276    3.152418   -0.485669
8    2.860541   -1.080273    0.112447
1    2.000182   -1.328802    0.507868
6    3.064419   -1.882517   -1.043924
1    4.044732   -1.627224   -1.450436
1    3.058866   -2.947679   -0.787204
1    2.301896   -1.692714   -1.808622
8    0.471895   -2.164330    0.844416
1   -0.417431   -1.785094    1.102121
6    0.655692   -3.399639    1.523554
1    0.624833   -3.259159    2.608600
1   -0.111919   -4.124150    1.233292
1    1.637813   -3.791111    1.248370
8   -1.952410   -1.385650    1.344768
1   -2.428323   -1.505196    0.484135
6   -2.359391   -0.152207    1.924963
1   -2.235004    0.680094    1.220506
1   -3.405378   -0.208069    2.246038
1   -1.736433    0.021295    2.805637
8   -2.973321   -1.554701   -1.110258
1   -2.113770   -1.628227   -1.571760
6   -3.645294   -0.374990   -1.547022
1   -3.062922    0.527914   -1.328065
1   -3.859584   -0.427743   -2.619631
1   -4.594273   -0.330033   -1.008268
6   -0.120486   -0.104691   -1.435844
1   -0.553727    0.495671   -2.238238
1   -0.640906    0.145478   -0.502094
1    0.941860    0.151111   -1.340530
8   -0.299909   -1.477234   -1.776626
1    0.051716   -2.000051   -1.035207
-----

```

Cartesian coordinates of : L8

Atomic number (AN) and Cartesian coordinates

```

-----
AN      X          Y          Z
-----
8      1.808001    2.085275   -1.352122
1      2.054971    2.098072   -0.407840
8      2.013779    1.943906    1.392691
1      1.922628    0.968675    1.491611
8      1.495859   -0.676782    1.587501
1      1.793023   -1.165519    0.771790
6      2.876860    2.573563   -2.130940
1      3.769170    1.936470   -2.052931
1      2.550052    2.579078   -3.173539
-----

```



|   |           |           |           |
|---|-----------|-----------|-----------|
| 1 | 3.156301  | 3.597568  | -1.852587 |
| 6 | 0.773931  | 2.530895  | 1.727767  |
| 1 | 0.024929  | 2.355730  | 0.940644  |
| 1 | 0.394689  | 2.143895  | 2.684281  |
| 1 | 0.925604  | 3.607994  | 1.825697  |
| 6 | 1.830889  | -1.431632 | 2.737665  |
| 1 | 1.283682  | -2.382047 | 2.758041  |
| 1 | 2.905245  | -1.640648 | 2.784242  |
| 1 | 1.548500  | -0.847584 | 3.616966  |
| 8 | 2.239091  | -1.956443 | -0.576609 |
| 1 | 1.428456  | -2.357077 | -0.970209 |
| 6 | 2.917391  | -1.153021 | -1.534868 |
| 1 | 3.807909  | -0.749527 | -1.047003 |
| 1 | 3.231554  | -1.756895 | -2.392148 |
| 1 | 2.296058  | -0.314949 | -1.871140 |
| 8 | -0.170735 | -2.986666 | -1.124735 |
| 1 | -0.766019 | -2.266411 | -1.420219 |
| 6 | -0.490453 | -3.243819 | 0.233637  |
| 1 | -0.387653 | -2.335321 | 0.843116  |
| 1 | -1.510973 | -3.629836 | 0.333681  |
| 1 | 0.208559  | -3.999563 | 0.600021  |
| 8 | -1.531015 | -0.700316 | -1.347267 |
| 1 | -2.406506 | -0.274413 | -1.416922 |
| 6 | -0.527719 | 0.307247  | -1.305712 |
| 1 | -0.122816 | 0.515855  | -2.300227 |
| 1 | -0.922447 | 1.241474  | -0.891114 |
| 1 | 0.288179  | -0.039362 | -0.661403 |
| 8 | -3.725487 | 0.874098  | -0.980859 |
| 1 | -3.377509 | 1.202374  | -0.131041 |
| 6 | -5.068557 | 0.458965  | -0.806809 |
| 1 | -5.155845 | -0.319298 | -0.038757 |
| 1 | -5.712580 | 1.302141  | -0.534426 |
| 1 | -5.411867 | 0.052166  | -1.759349 |
| 6 | -1.877471 | 0.041944  | 1.795384  |
| 1 | -2.396480 | -0.741985 | 1.241191  |
| 1 | -0.826237 | 0.043950  | 1.487110  |
| 1 | -1.949464 | -0.161369 | 2.869577  |
| 8 | -2.532129 | 1.269525  | 1.470069  |
| 1 | -2.031257 | 2.010719  | 1.826789  |

-----

Cartesian coordinates of : CY8\_3

-----

Atomic number (AN) and Cartesian coordinates

| AN | X         | Y         | Z         |
|----|-----------|-----------|-----------|
| 1  | 2.559880  | 1.240493  | 2.156978  |
| 6  | 3.392344  | 0.555564  | 1.957720  |
| 1  | 4.328203  | 1.123642  | 1.946052  |
| 1  | 3.437531  | -0.185496 | 2.759162  |
| 8  | 3.208984  | -0.139704 | 0.733558  |
| 1  | 2.966812  | 0.520343  | 0.045579  |
| 1  | 3.030553  | -3.565365 | 1.449086  |
| 6  | 2.366886  | -3.407453 | 0.592081  |
| 1  | 2.971938  | -3.357717 | -0.321048 |
| 1  | 1.684719  | -4.256658 | 0.517373  |
| 8  | 1.585517  | -2.237315 | 0.763188  |
| 1  | 2.186898  | -1.451048 | 0.780789  |
| 1  | 1.407550  | -1.752423 | -2.538409 |
| 6  | 0.657557  | -1.084830 | -2.098051 |
| 1  | 1.168031  | -0.244754 | -1.607825 |
| 1  | 0.024408  | -0.693401 | -2.898774 |
| 8  | -0.174805 | -1.786455 | -1.189131 |
| 1  | 0.376078  | -2.017496 | -0.402678 |
| 1  | 0.564180  | 0.210481  | 0.826456  |

|   |           |           |           |
|---|-----------|-----------|-----------|
| 6 | -0.120718 | 0.071136  | 1.675319  |
| 1 | -0.816183 | -0.737164 | 1.425101  |
| 1 | 0.465332  | -0.231404 | 2.548238  |
| 8 | -0.811195 | 1.284797  | 1.941388  |
| 1 | -1.769829 | 1.105497  | 1.831255  |
| 1 | -3.281970 | -2.981796 | -0.299559 |
| 6 | -3.503914 | -2.237751 | -1.073069 |
| 1 | -3.336873 | -2.685711 | -2.058273 |
| 1 | -4.554680 | -1.950600 | -0.992832 |
| 8 | -2.721513 | -1.066829 | -0.909313 |
| 1 | -1.768092 | -1.309639 | -0.997417 |
| 1 | -5.307948 | 0.590957  | 0.881614  |
| 6 | -4.414612 | 1.217704  | 0.986883  |
| 1 | -4.298310 | 1.822638  | 0.079195  |
| 1 | -4.560388 | 1.886856  | 1.837134  |
| 8 | -3.266932 | 0.432298  | 1.244093  |
| 1 | -3.077223 | -0.134621 | 0.459663  |
| 1 | 2.534298  | 3.297636  | -2.302583 |
| 6 | 2.623559  | 2.212098  | -2.187158 |
| 1 | 1.960967  | 1.722055  | -2.913646 |
| 1 | 3.653098  | 1.920565  | -2.404770 |
| 8 | 2.326859  | 1.814597  | -0.863300 |
| 1 | 1.435883  | 2.162791  | -0.600732 |
| 1 | -2.047501 | 2.229423  | -0.968156 |
| 6 | -1.016449 | 1.885231  | -1.103184 |
| 1 | -0.979621 | 0.807313  | -0.901731 |
| 1 | -0.720774 | 2.062760  | -2.140497 |
| 8 | -0.122533 | 2.603611  | -0.265319 |
| 1 | -0.339951 | 2.341662  | 0.660681  |

-----

Cartesian coordinates of : CY8\_4

-----

Atomic number (AN) and Cartesian coordinates

| AN | X         | Y         | Z         |
|----|-----------|-----------|-----------|
| 1  | 0.687135  | -0.126842 | -1.557465 |
| 6  | -0.074693 | -0.355067 | -2.317345 |
| 1  | -0.284299 | 0.556483  | -2.890645 |
| 1  | 0.332866  | -1.105657 | -2.998348 |
| 8  | -1.259582 | -0.878869 | -1.746225 |
| 1  | -1.724521 | -0.154584 | -1.262200 |
| 1  | -3.949082 | -2.671437 | -0.379477 |
| 6  | -3.281752 | -2.284230 | 0.398247  |
| 1  | -3.353585 | -1.190114 | 0.426520  |
| 1  | -3.595166 | -2.691145 | 1.361673  |
| 8  | -1.942855 | -2.707354 | 0.171687  |
| 1  | -1.614287 | -2.239174 | -0.622381 |
| 1  | -1.268763 | 0.034700  | 1.824658  |
| 6  | -0.277536 | -0.366252 | 1.582449  |
| 1  | -0.097663 | -0.221211 | 0.507486  |
| 1  | 0.478557  | 0.194094  | 2.139383  |
| 8  | -0.166680 | -1.732871 | 1.950381  |
| 1  | -0.846680 | -2.222122 | 1.433312  |
| 1  | 1.945260  | 2.077818  | -2.029880 |
| 6  | 1.978620  | 2.796926  | -1.203694 |
| 1  | 2.970762  | 3.261963  | -1.176285 |
| 1  | 1.232042  | 3.575275  | -1.381176 |
| 8  | 1.677505  | 2.170664  | 0.031512  |
| 1  | 2.125561  | 1.286764  | 0.049879  |
| 1  | 0.579329  | -2.553474 | -0.866132 |
| 6  | 1.451207  | -3.088235 | -0.469452 |
| 1  | 1.142152  | -4.092181 | -0.162042 |
| 1  | 2.202287  | -3.171306 | -1.258051 |
| 8  | 2.039116  | -2.383167 | 0.615695  |

|   |           |           |           |
|---|-----------|-----------|-----------|
| 1 | 1.323933  | -2.222262 | 1.277916  |
| 1 | 4.908017  | -0.777060 | -0.541938 |
| 6 | 4.359488  | -0.025977 | 0.036599  |
| 1 | 4.568951  | -0.172748 | 1.101870  |
| 1 | 4.711091  | 0.966364  | -0.256536 |
| 8 | 2.970030  | -0.093721 | -0.234167 |
| 1 | 2.612562  | -0.959762 | 0.103200  |
| 1 | -2.755339 | 2.559689  | -1.826814 |
| 6 | -3.347110 | 1.889034  | -1.192907 |
| 1 | -4.012717 | 2.490517  | -0.564198 |
| 1 | -3.955638 | 1.245270  | -1.831817 |
| 8 | -2.516854 | 1.055138  | -0.402772 |
| 1 | -1.891272 | 1.623057  | 0.113772  |
| 1 | -0.225012 | 4.017605  | 2.237333  |
| 6 | -0.836542 | 3.115621  | 2.128351  |
| 1 | -0.496952 | 2.365168  | 2.852293  |
| 1 | -1.875796 | 3.367991  | 2.349742  |
| 8 | -0.782898 | 2.624802  | 0.802093  |
| 1 | 0.153919  | 2.420429  | 0.547234  |

-----

Cartesian coordinates of : CY8\_2

-----

Atomic number (AN) and Cartesian coordinates

| AN | X         | Y         | Z         |
|----|-----------|-----------|-----------|
| 1  | -0.661146 | -0.049278 | -1.053131 |
| 6  | 0.313764  | -0.100140 | -1.553698 |
| 1  | 0.240186  | 0.383926  | -2.531927 |
| 1  | 1.034393  | 0.455432  | -0.940958 |
| 8  | 0.739205  | -1.448283 | -1.704533 |
| 1  | 0.047073  | -2.028894 | -1.308231 |
| 1  | 3.649047  | -3.497289 | -0.850129 |
| 6  | 3.249547  | -2.983822 | 0.030832  |
| 1  | 2.360386  | -3.520200 | 0.385079  |
| 1  | 4.005681  | -2.998432 | 0.818030  |
| 8  | 2.954056  | -1.628226 | -0.262697 |
| 1  | 2.193709  | -1.603817 | -0.896622 |
| 1  | 0.426516  | -0.854336 | 2.763909  |
| 6  | 0.673013  | -0.500019 | 1.758064  |
| 1  | 0.462458  | -1.300607 | 1.039715  |
| 1  | 0.023866  | 0.351129  | 1.514121  |
| 8  | 2.036095  | -0.104966 | 1.702037  |
| 1  | 2.495546  | -0.683887 | 1.046080  |
| 1  | -2.537170 | 1.216705  | -1.922204 |
| 6  | -3.159753 | 1.479080  | -1.058041 |
| 1  | -3.579059 | 2.479476  | -1.213999 |
| 1  | -3.982641 | 0.763719  | -0.984611 |
| 8  | -2.420986 | 1.419356  | 0.149671  |
| 1  | -1.574212 | 1.920045  | 0.024515  |
| 1  | 3.327660  | 1.101772  | -0.666491 |
| 6  | 3.147262  | 2.150644  | -0.401406 |
| 1  | 4.075974  | 2.586429  | -0.019050 |
| 1  | 2.846007  | 2.693373  | -1.302059 |
| 8  | 2.107732  | 2.267076  | 0.560018  |
| 1  | 2.123700  | 1.454794  | 1.127319  |
| 1  | 0.254224  | 4.729081  | -0.994548 |
| 6  | -0.432471 | 4.194591  | -0.328929 |
| 1  | -0.275545 | 4.539803  | 0.698642  |
| 1  | -1.457956 | 4.428084  | -0.625900 |
| 8  | -0.253820 | 2.792182  | -0.437683 |
| 1  | 0.634022  | 2.556001  | -0.055595 |
| 1  | -2.661754 | -1.836600 | -1.886012 |
| 6  | -2.351565 | -2.825524 | -1.524233 |
| 1  | -3.220395 | -3.335858 | -1.096145 |

|   |           |           |           |
|---|-----------|-----------|-----------|
| 1 | -1.979113 | -3.407600 | -2.369227 |
| 8 | -1.302714 | -2.723027 | -0.574112 |
| 1 | -1.634599 | -2.179068 | 0.175737  |
| 1 | -3.771712 | -0.731446 | 2.681231  |
| 6 | -2.724643 | -1.021607 | 2.539350  |
| 1 | -2.087380 | -0.343514 | 3.119368  |
| 1 | -2.587636 | -2.037665 | 2.915441  |
| 8 | -2.372236 | -1.014335 | 1.169363  |
| 1 | -2.379708 | -0.088726 | 0.819501  |

-----  
Cartesian coordinates of : CY8\_5

-----  
Atomic number (AN) and Cartesian coordinates

| AN | X         | Y         | Z         |
|----|-----------|-----------|-----------|
| 1  | -3.042815 | -3.266200 | 0.538643  |
| 6  | -2.335089 | -3.087533 | 1.358652  |
| 1  | -2.894894 | -2.951543 | 2.290265  |
| 1  | -1.693367 | -3.964814 | 1.461581  |
| 8  | -1.506485 | -1.968434 | 1.098091  |
| 1  | -2.067191 | -1.151042 | 1.116181  |
| 1  | -1.335651 | -0.122369 | -1.449062 |
| 6  | -1.070892 | -1.032994 | -2.001329 |
| 1  | -1.989966 | -1.549154 | -2.304272 |
| 1  | -0.521347 | -0.748104 | -2.901759 |
| 8  | -0.240305 | -1.890844 | -1.236176 |
| 1  | -0.651200 | -1.997960 | -0.343813 |
| 1  | 2.751521  | -3.009721 | -2.643233 |
| 6  | 3.005223  | -2.724292 | -1.616487 |
| 1  | 2.725686  | -3.542814 | -0.942017 |
| 1  | 4.084090  | -2.569463 | -1.552486 |
| 8  | 2.370912  | -1.510695 | -1.253973 |
| 1  | 1.389529  | -1.642050 | -1.271086 |
| 1  | 1.460178  | 0.829716  | -1.485044 |
| 6  | 1.131733  | 1.855722  | -1.690539 |
| 1  | 2.002219  | 2.455259  | -1.981741 |
| 1  | 0.426033  | 1.841567  | -2.525185 |
| 8  | 0.472409  | 2.431528  | -0.574471 |
| 1  | 1.056965  | 2.317306  | 0.218212  |
| 1  | 2.404282  | -2.448665 | 2.024794  |
| 6  | 1.990582  | -1.433739 | 1.998896  |
| 1  | 0.962317  | -1.471806 | 1.621230  |
| 1  | 1.975073  | -1.039407 | 3.016915  |
| 8  | 2.811638  | -0.576577 | 1.216842  |
| 1  | 2.752357  | -0.876544 | 0.279607  |
| 1  | 3.988975  | 2.342383  | 0.261235  |
| 6  | 3.441549  | 2.714146  | 1.136186  |
| 1  | 4.090228  | 2.643381  | 2.015920  |
| 1  | 3.187202  | 3.763714  | 0.971773  |
| 8  | 2.234471  | 2.000780  | 1.336493  |
| 1  | 2.437162  | 1.031024  | 1.351514  |
| 1  | -3.919532 | -0.614860 | -0.852564 |
| 6  | -4.248690 | -0.258347 | 0.131983  |
| 1  | -4.929946 | 0.587605  | -0.011215 |
| 1  | -4.794333 | -1.060017 | 0.635498  |
| 8  | -3.150958 | 0.104224  | 0.950399  |
| 1  | -2.705530 | 0.882029  | 0.527133  |
| 1  | -2.390267 | 4.037944  | -1.107766 |
| 6  | -2.674257 | 3.385195  | -0.275461 |
| 1  | -2.359262 | 3.850035  | 0.665526  |
| 1  | -3.761780 | 3.280075  | -0.268308 |
| 8  | -2.111344 | 2.094299  | -0.431670 |
| 1  | -1.120403 | 2.181306  | -0.452165 |

-----

Cartesian coordinates of : CY8\_1

-----  
Atomic number (AN) and Cartesian coordinates

| AN | X         | Y         | Z         |
|----|-----------|-----------|-----------|
| 6  | 3.032354  | 3.096095  | -1.038434 |
| 8  | 2.243716  | 1.928042  | -0.891876 |
| 8  | -0.366955 | 2.327465  | -1.182677 |
| 6  | -0.799287 | 1.084079  | -1.720242 |
| 8  | 2.112607  | 0.621561  | 1.456109  |
| 6  | 0.789626  | 1.046754  | 1.762130  |
| 8  | 1.762043  | -1.983310 | 1.305855  |
| 6  | 2.902272  | -2.777389 | 1.581734  |
| 8  | 0.680230  | -2.169019 | -1.114434 |
| 6  | 1.621907  | -1.484212 | -1.927486 |
| 8  | -1.938093 | -1.819491 | -1.351585 |
| 6  | -2.570698 | -3.084416 | -1.436937 |
| 8  | -1.988434 | 2.204811  | 0.977811  |
| 6  | -3.242921 | 2.850342  | 0.841959  |
| 8  | -2.406741 | -0.436951 | 0.894215  |
| 6  | -1.839402 | -1.314595 | 1.855004  |
| 1  | 2.801408  | 3.838323  | -0.264837 |
| 1  | 2.882916  | 3.550405  | -2.023708 |
| 1  | 4.080333  | 2.805646  | -0.942723 |
| 1  | 1.288554  | 2.161459  | -1.008030 |
| 1  | 0.060143  | 0.605150  | 1.069679  |
| 1  | 0.700424  | 2.136550  | 1.717272  |
| 1  | 0.556211  | 0.714043  | 2.775721  |
| 1  | 2.346292  | 1.042156  | 0.598013  |
| 1  | 3.243827  | -2.629523 | 2.611684  |
| 1  | 3.728099  | -2.550100 | 0.896660  |
| 1  | 2.619090  | -3.824061 | 1.453903  |
| 1  | 1.992215  | -1.022068 | 1.393891  |
| 1  | -0.824860 | -1.624855 | 1.574234  |
| 1  | -2.465437 | -2.204539 | 1.988426  |
| 1  | -1.788390 | -0.779876 | 2.806442  |
| 1  | -2.328458 | -0.868450 | 0.010851  |
| 1  | 2.534754  | -2.078665 | -2.049647 |
| 1  | 1.882433  | -0.502534 | -1.512627 |
| 1  | 1.168912  | -1.337271 | -2.910853 |
| 1  | 1.026379  | -2.183777 | -0.189361 |
| 1  | -2.274472 | -3.739968 | -0.608901 |
| 1  | -2.332380 | -3.580511 | -2.383938 |
| 1  | -3.649396 | -2.921833 | -1.388617 |
| 1  | -0.958711 | -1.951133 | -1.318800 |
| 1  | -1.892010 | 1.027724  | -1.764288 |
| 1  | -0.430994 | 0.240019  | -1.121716 |
| 1  | -0.399257 | 0.998239  | -2.732818 |
| 1  | -0.870246 | 2.459277  | -0.348095 |
| 1  | -3.898175 | 2.620490  | 1.688948  |
| 1  | -3.748066 | 2.558464  | -0.087068 |
| 1  | -3.062847 | 3.926815  | 0.819796  |
| 1  | -2.138393 | 1.229600  | 0.996794  |

  
-----

Cartesian coordinates of the methanol nonamer

Cartesian coordinates of : BC9\_14

-----  
Atomic number (AN) and Cartesian coordinates

| AN | X | Y | Z |
|----|---|---|---|
|----|---|---|---|

```
-----  
6      1.347008      3.257602      -2.162763  
8      0.784409      2.569104      -1.056604  
8     -1.654898      1.689265      -0.293425  
6     -1.389598      1.824690      1.103946  
8     -2.617064     -0.607220     -1.063325  
6     -3.490480     -0.443689     -2.169876  
8     -0.643731     -2.292331     -0.304931  
6     -0.889276     -2.111892      1.090998  
8      1.826850     -1.966056     -1.068771  
6      2.135448     -2.809090     -2.167941  
8      2.302355      0.586217     -0.312377  
6      2.267050      0.282437      1.083447  
1      1.325598      2.640454     -3.067598  
1      2.382025      3.550967     -1.954900  
1      0.753055      4.156945     -2.334978  
1      1.354767      1.783563     -0.822565  
1     -1.502432      2.867690      1.416366  
1     -0.372681      1.493335      1.344199  
1     -2.107905      1.200099      1.640228  
1     -0.886710      2.060619     -0.773288  
1     -2.940417     -0.148173     -3.069985  
1     -4.255805      0.310502     -1.955345  
1     -3.980599     -1.401294     -2.354384  
1     -2.218062      0.273974     -0.816154  
1      3.213889     -0.164000      1.403188  
1      1.453659     -0.415933      1.312187  
1      2.100187      1.217923      1.622611  
1      2.234139     -0.262337     -0.795443  
1     -1.741243     -2.719285      1.412428  
1     -1.100461     -1.060674      1.319291  
1      0.009038     -2.423479      1.629186  
1     -1.347107     -1.812386     -0.787613  
1      1.604401     -2.493031     -3.072457  
1      1.875790     -3.850342     -1.946738  
1      3.209860     -2.744094     -2.348736  
1      0.863693     -2.067170     -0.826072  
6      2.925451      3.765698      1.097566  
1      3.509678      3.820658      2.018572  
1      3.076782      4.698699      0.538289  
1      3.303890      2.926525      0.495533  
8      1.572158      3.582941      1.462249  
1      1.073226      3.425961      0.645298  
6     -4.723315      0.638243      1.097182  
1     -5.063680      1.111512      2.020639  
1     -5.606550      0.305740      0.535516  
1     -4.185512      1.389014      0.499712  
8     -3.888309     -0.444088      1.456426  
1     -3.504194     -0.794515      0.637484  
6      1.817363     -4.404047      1.105599  
1      1.584451     -4.932266      2.032601  
1      2.549742     -5.000237      0.544923  
1      0.895876     -4.323825      0.510373  
8      2.328694     -3.133934      1.456379  
1      2.432464     -2.628834      0.634637
```

Cartesian coordinates of : BDC9\_2

```
-----  
Atomic number (AN) and Cartesian coordinates
```

```
AN      X      Y      Z  
-----  
6     -1.616752     -0.879632     -2.076908  
1     -0.902410     -0.263920     -2.637798  
1     -2.629846     -0.495774     -2.240102  
1     -1.563123     -1.907787     -2.445831
```

|   |           |           |           |
|---|-----------|-----------|-----------|
| 8 | -1.287228 | -0.913195 | -0.700348 |
| 1 | -1.509519 | -0.069404 | -0.269689 |
| 6 | -2.347209 | -0.411898 | 2.364975  |
| 1 | -2.204220 | -0.364204 | 3.449547  |
| 1 | -2.159351 | -1.436147 | 2.023612  |
| 1 | -3.379373 | -0.141381 | 2.131000  |
| 8 | -1.494194 | 0.510268  | 1.695898  |
| 1 | -0.555083 | 0.198188  | 1.805001  |
| 6 | 2.053631  | 0.394262  | 1.999912  |
| 1 | 2.168616  | 0.951570  | 1.060498  |
| 1 | 2.968305  | -0.173129 | 2.196897  |
| 1 | 1.877149  | 1.097716  | 2.816683  |
| 8 | 0.926269  | -0.471475 | 1.932892  |
| 1 | 1.070430  | -1.075869 | 1.178114  |
| 6 | 1.242439  | -2.717929 | -1.134897 |
| 1 | 1.279789  | -2.606797 | -2.224031 |
| 1 | 0.228731  | -2.990856 | -0.827540 |
| 1 | 1.930642  | -3.512004 | -0.839956 |
| 8 | 1.673705  | -1.524055 | -0.491329 |
| 1 | 1.223554  | -0.737358 | -0.865665 |
| 6 | 4.915349  | -0.236774 | -0.227800 |
| 1 | 4.449824  | 0.693006  | 0.135037  |
| 1 | 4.841231  | -0.257582 | -1.324228 |
| 1 | 5.973843  | -0.210603 | 0.040780  |
| 8 | 4.350487  | -1.380018 | 0.365817  |
| 1 | 3.434565  | -1.467408 | 0.051493  |
| 6 | 1.846244  | 1.924689  | -1.678992 |
| 1 | 1.906683  | 2.807523  | -1.028989 |
| 1 | 1.594389  | 2.249020  | -2.695714 |
| 1 | 2.825404  | 1.441216  | -1.699466 |
| 8 | 0.914651  | 0.982029  | -1.186037 |
| 1 | 0.007740  | 1.357054  | -1.208071 |
| 6 | -3.464171 | -3.337463 | 0.067633  |
| 1 | -3.705800 | -3.115121 | -0.981359 |
| 1 | -3.980751 | -2.603959 | 0.703409  |
| 1 | -3.854062 | -4.329477 | 0.305222  |
| 8 | -2.073974 | -3.355443 | 0.299807  |
| 1 | -1.725781 | -2.479503 | 0.055595  |
| 6 | -2.192389 | 2.611041  | -2.285348 |
| 1 | -1.772371 | 3.612027  | -2.435179 |
| 1 | -3.278176 | 2.691827  | -2.169293 |
| 1 | -1.978966 | 2.005404  | -3.169387 |
| 8 | -1.607562 | 1.964115  | -1.167964 |
| 1 | -1.725159 | 2.504034  | -0.345511 |
| 6 | -0.174839 | 3.396483  | 1.331642  |
| 1 | 0.428817  | 2.575609  | 0.918987  |
| 1 | 0.102099  | 3.550791  | 2.379999  |
| 1 | 0.038189  | 4.311489  | 0.774542  |
| 8 | -1.563193 | 3.124612  | 1.203113  |
| 1 | -1.711516 | 2.240434  | 1.605283  |

-----  
Cartesian coordinates of : DC9

-----  
Atomic number (AN) and Cartesian coordinates

| AN | X         | Y         | Z         |
|----|-----------|-----------|-----------|
| 8  | 0.049863  | 2.370002  | -0.063313 |
| 1  | -0.868757 | 2.029898  | -0.177760 |
| 8  | -3.420736 | -0.727762 | 0.275677  |
| 1  | -2.750102 | -1.449017 | 0.304567  |
| 8  | 1.057135  | 0.258471  | 1.381123  |
| 1  | 0.931805  | 1.026070  | 0.785539  |
| 6  | -0.022577 | 3.706775  | 0.386936  |
| 1  | -0.382971 | 3.769881  | 1.422698  |

|   |           |           |           |
|---|-----------|-----------|-----------|
| 1 | 0.983356  | 4.132765  | 0.344804  |
| 1 | -0.680276 | 4.306751  | -0.253443 |
| 6 | -4.524873 | -1.143892 | -0.507249 |
| 1 | -4.201358 | -1.598596 | -1.451175 |
| 1 | -5.146680 | -1.862990 | 0.037594  |
| 1 | -5.127186 | -0.260655 | -0.733674 |
| 6 | -0.139861 | 0.137470  | 2.131432  |
| 1 | -0.333571 | 1.044868  | 2.716872  |
| 1 | -1.001088 | -0.055287 | 1.476852  |
| 1 | -0.015346 | -0.699952 | 2.821911  |
| 8 | -2.570864 | 1.767600  | -0.181867 |
| 1 | -2.750851 | 0.800982  | -0.129394 |
| 6 | -3.196660 | 2.362777  | 0.941731  |
| 1 | -3.157004 | 3.447161  | 0.813956  |
| 1 | -4.245130 | 2.055127  | 1.018152  |
| 1 | -2.685657 | 2.094661  | 1.876015  |
| 8 | -0.348801 | -0.264395 | -1.020034 |
| 1 | 0.531431  | 0.161963  | -1.115600 |
| 6 | -1.029766 | -0.187490 | -2.261053 |
| 1 | -1.238921 | 0.854880  | -2.527832 |
| 1 | -0.453540 | -0.663303 | -3.063789 |
| 1 | -1.979972 | -0.716420 | -2.146513 |
| 8 | 2.208583  | 0.675599  | -1.351138 |
| 1 | 2.921916  | 0.217406  | -0.851374 |
| 6 | 2.585109  | 2.027997  | -1.541812 |
| 1 | 2.742529  | 2.536287  | -0.581881 |
| 1 | 3.499159  | 2.096715  | -2.142646 |
| 1 | 1.768456  | 2.531382  | -2.060462 |
| 8 | 4.049997  | -0.617911 | 0.180491  |
| 1 | 3.433380  | -1.338849 | 0.415989  |
| 6 | 4.375334  | 0.120206  | 1.351212  |
| 1 | 3.470496  | 0.481012  | 1.852140  |
| 1 | 4.962778  | -0.488660 | 2.047051  |
| 1 | 4.984353  | 0.971060  | 1.038225  |
| 6 | 1.699923  | -2.551962 | -1.100362 |
| 1 | 2.366068  | -3.408439 | -1.224523 |
| 1 | 0.681024  | -2.856618 | -1.370942 |
| 1 | 2.016831  | -1.750828 | -1.777790 |
| 8 | 1.784779  | -2.157821 | 0.262395  |
| 1 | 1.358690  | -1.290638 | 0.425909  |
| 6 | -0.951331 | -3.426705 | 0.997964  |
| 1 | -1.772795 | -4.101130 | 1.246352  |
| 1 | -0.120909 | -4.003979 | 0.580882  |
| 1 | -0.604074 | -2.928612 | 1.909188  |
| 8 | -1.451330 | -2.494359 | 0.051873  |
| 1 | -0.776884 | -1.831350 | -0.200352 |

-----

Cartesian coordinates of : BDC9\_1

-----

Atomic number (AN) and Cartesian coordinates

| AN | X         | Y         | Z         |
|----|-----------|-----------|-----------|
| 8  | 1.804325  | 1.825740  | -0.092524 |
| 1  | 2.555416  | 1.221088  | -0.229729 |
| 8  | -3.712198 | 1.991765  | 0.026911  |
| 1  | -4.141176 | 1.109265  | 0.061678  |
| 8  | 4.987465  | -0.376969 | 1.367903  |
| 1  | 4.519647  | -0.597725 | 0.547323  |
| 6  | 1.324023  | 2.175319  | -1.382946 |
| 1  | 1.047383  | 1.280892  | -1.956112 |
| 1  | 0.429375  | 2.783456  | -1.248451 |
| 1  | 2.075389  | 2.751583  | -1.936688 |
| 6  | -4.155408 | 2.778993  | 1.116423  |
| 1  | -5.227554 | 2.992640  | 1.041086  |



|   |           |           |           |
|---|-----------|-----------|-----------|
| 1 | -3.957095 | 2.289360  | 2.077212  |
| 1 | -3.610246 | 3.724237  | 1.085381  |
| 6 | 4.936222  | 1.025359  | 1.514359  |
| 1 | 5.358521  | 1.547990  | 0.644979  |
| 1 | 3.911550  | 1.392223  | 1.672343  |
| 1 | 5.530932  | 1.287051  | 2.392113  |
| 8 | 3.416271  | -0.299362 | -0.960604 |
| 1 | 2.577098  | -0.814137 | -1.056165 |
| 6 | 4.038533  | -0.136531 | -2.225988 |
| 1 | 4.925510  | 0.483324  | -2.080184 |
| 1 | 4.349274  | -1.100767 | -2.641751 |
| 1 | 3.368791  | 0.363231  | -2.935155 |
| 8 | 0.987591  | -1.370074 | -1.009990 |
| 1 | 0.650325  | -0.977019 | -0.172094 |
| 6 | 0.601851  | -2.735444 | -1.089829 |
| 1 | 1.111174  | -3.339062 | -0.328683 |
| 1 | -0.481998 | -2.833629 | -0.968206 |
| 1 | 0.889721  | -3.101914 | -2.077072 |
| 8 | 0.436935  | -0.100645 | 1.326961  |
| 1 | 0.610519  | 0.746390  | 0.865072  |
| 6 | 1.528971  | -0.368936 | 2.196703  |
| 1 | 2.464565  | -0.527836 | 1.645677  |
| 1 | 1.672375  | 0.448103  | 2.911103  |
| 1 | 1.292065  | -1.280889 | 2.749729  |
| 8 | -1.302306 | 0.871100  | -0.542206 |
| 1 | -2.030509 | 1.441093  | -0.217470 |
| 6 | -1.644482 | 0.478497  | -1.862442 |
| 1 | -2.645882 | 0.029897  | -1.894086 |
| 1 | -1.619751 | 1.333388  | -2.549343 |
| 1 | -0.908504 | -0.263450 | -2.181430 |
| 6 | -1.534224 | -2.204945 | 1.758234  |
| 1 | -2.222826 | -3.030419 | 1.950656  |
| 1 | -0.526820 | -2.613237 | 1.609663  |
| 1 | -1.515356 | -1.536669 | 2.624751  |
| 8 | -1.986771 | -1.535624 | 0.594832  |
| 1 | -1.488363 | -0.701604 | 0.467037  |
| 6 | -5.166719 | -1.362900 | -0.772314 |
| 1 | -6.059064 | -0.808821 | -1.069794 |
| 1 | -4.546558 | -1.533478 | -1.660844 |
| 1 | -5.476930 | -2.332108 | -0.365681 |
| 8 | -4.485215 | -0.594704 | 0.201254  |
| 1 | -3.622375 | -1.018748 | 0.409629  |

-----  
Cartesian coordinates of : BL9

-----  
Atomic number (AN) and Cartesian coordinates

| AN | X         | Y         | Z         |
|----|-----------|-----------|-----------|
| 8  | -1.541497 | -0.200977 | -1.331300 |
| 1  | -2.153856 | -0.518755 | -0.641787 |
| 8  | 4.464816  | 1.275717  | -0.486402 |
| 1  | 3.597519  | 1.603517  | -0.784684 |
| 8  | -3.943797 | 0.327995  | 0.320346  |
| 1  | -3.255214 | 0.911748  | 0.689600  |
| 6  | -2.222146 | 0.701781  | -2.181058 |
| 1  | -2.399697 | 1.661675  | -1.679768 |
| 1  | -1.589761 | 0.871637  | -3.057242 |
| 1  | -3.182099 | 0.292138  | -2.516732 |
| 6  | 4.626752  | 1.710930  | 0.844461  |
| 1  | 4.623141  | 2.804973  | 0.924815  |
| 1  | 3.839078  | 1.316128  | 1.505380  |
| 1  | 5.591378  | 1.340404  | 1.201324  |
| 6  | -5.005929 | 1.126677  | -0.155387 |
| 1  | -5.539786 | 1.625614  | 0.663418  |



|   |           |           |           |
|---|-----------|-----------|-----------|
| 6 | -0.710393 | 0.508452  | -2.250619 |
| 1 | -1.785585 | 0.466766  | -2.045678 |
| 1 | -0.556333 | 0.515859  | -3.335187 |
| 1 | -0.248782 | -0.390849 | -1.823862 |
| 8 | 2.356059  | 1.153472  | -1.119840 |
| 1 | 2.396435  | 0.158152  | -0.905826 |
| 6 | 3.352791  | 1.458413  | -2.085377 |
| 1 | 4.354651  | 1.282704  | -1.679167 |
| 1 | 3.222339  | 0.850552  | -2.986779 |
| 1 | 3.258940  | 2.513330  | -2.350673 |
| 8 | 2.588361  | -1.289605 | -0.556046 |
| 1 | 1.796923  | -1.889427 | -0.458613 |
| 6 | 3.487224  | -1.512310 | 0.524211  |
| 1 | 2.937614  | -1.712074 | 1.448104  |
| 1 | 4.159107  | -2.346001 | 0.293931  |
| 1 | 4.083702  | -0.605467 | 0.664153  |
| 8 | 0.576105  | -2.920586 | -0.226621 |
| 1 | -0.330881 | -2.564615 | -0.369549 |
| 6 | 0.601666  | -3.615997 | 1.015226  |
| 1 | 0.638895  | -2.916060 | 1.857261  |
| 1 | -0.274734 | -4.265989 | 1.105944  |
| 1 | 1.499553  | -4.238864 | 1.025843  |
| 6 | 1.366256  | 2.813325  | 1.855553  |
| 1 | 1.129242  | 2.765049  | 2.920585  |
| 1 | 1.826824  | 3.785616  | 1.645323  |
| 1 | 0.431302  | 2.723248  | 1.288797  |
| 8 | 2.261639  | 1.748935  | 1.572659  |
| 1 | 2.397269  | 1.693492  | 0.608360  |
| 6 | -0.267965 | -0.273468 | 1.500186  |
| 1 | -0.931497 | -1.143489 | 1.539222  |
| 1 | -0.792979 | 0.582160  | 1.948370  |
| 1 | -0.074397 | -0.039737 | 0.440372  |
| 8 | 0.915548  | -0.599347 | 2.192729  |
| 1 | 1.519253  | 0.161870  | 2.104384  |

-----  
Cartesian coordinates of : BC9\_12

-----  
Atomic number (AN) and Cartesian coordinates

| AN | X         | Y         | Z         |
|----|-----------|-----------|-----------|
| 1  | 3.277960  | -1.558513 | 2.229335  |
| 6  | 3.901030  | -1.629631 | 1.327939  |
| 1  | 4.811183  | -1.039127 | 1.475909  |
| 1  | 4.180216  | -2.675464 | 1.180823  |
| 8  | 3.203224  | -1.195452 | 0.174416  |
| 1  | 3.065407  | -0.214743 | 0.244041  |
| 1  | 2.609523  | -4.272589 | -1.037689 |
| 6  | 1.898301  | -3.613314 | -1.547538 |
| 1  | 2.427486  | -3.046075 | -2.320538 |
| 1  | 1.129451  | -4.227317 | -2.022981 |
| 8  | 1.256252  | -2.751476 | -0.622744 |
| 1  | 1.927421  | -2.102441 | -0.280711 |
| 1  | -1.238394 | -3.807941 | 0.156896  |
| 6  | -1.927698 | -3.130377 | -0.356167 |
| 1  | -2.652400 | -3.720636 | -0.923820 |
| 1  | -2.458365 | -2.530917 | 0.394441  |
| 8  | -1.211879 | -2.287988 | -1.254192 |
| 1  | -0.239680 | -2.354763 | -1.044656 |
| 1  | 1.371516  | 4.432486  | -2.586284 |
| 6  | 1.981870  | 3.546546  | -2.378776 |
| 1  | 1.885742  | 2.843616  | -3.214580 |
| 1  | 3.026567  | 3.853376  | -2.298710 |
| 8  | 1.612686  | 2.950815  | -1.150514 |
| 1  | 0.661402  | 2.695709  | -1.168308 |

|   |           |           |           |
|---|-----------|-----------|-----------|
| 1 | -4.158274 | -0.820844 | -1.567983 |
| 6 | -3.453787 | -0.071392 | -1.948956 |
| 1 | -3.180596 | -0.328227 | -2.976981 |
| 1 | -3.939634 | 0.907328  | -1.945126 |
| 8 | -2.301248 | 0.005695  | -1.120452 |
| 1 | -1.791053 | -0.865271 | -1.202454 |
| 1 | -1.189401 | 1.977945  | 1.049361  |
| 6 | -1.425888 | 2.748134  | 0.304321  |
| 1 | -2.505511 | 2.942499  | 0.306076  |
| 1 | -0.906048 | 3.669512  | 0.576394  |
| 8 | -0.985448 | 2.376792  | -0.995344 |
| 1 | -1.362959 | 1.496643  | -1.195760 |
| 1 | 1.249005  | 1.804101  | 1.745357  |
| 6 | 2.343521  | 1.826485  | 1.786681  |
| 1 | 2.680591  | 2.838461  | 2.035172  |
| 1 | 2.665713  | 1.144365  | 2.577787  |
| 8 | 2.929908  | 1.390505  | 0.567498  |
| 1 | 2.554307  | 1.937153  | -0.159110 |
| 6 | -4.162555 | 0.605173  | 1.845555  |
| 1 | -4.541736 | 0.275033  | 2.814316  |
| 1 | -3.859017 | 1.656312  | 1.929493  |
| 1 | -4.973166 | 0.526536  | 1.111112  |
| 8 | -3.071434 | -0.229977 | 1.505514  |
| 1 | -2.802448 | -0.058220 | 0.579318  |
| 6 | 0.074169  | -0.615030 | 1.434681  |
| 1 | 1.146984  | -0.718968 | 1.614069  |
| 1 | -0.356512 | -1.621374 | 1.357582  |
| 1 | -0.054765 | -0.102111 | 0.465477  |
| 8 | -0.480598 | 0.119678  | 2.504525  |
| 1 | -1.446005 | 0.036170  | 2.426633  |

-----

Cartesian coordinates of : L9

-----

Atomic number (AN) and Cartesian coordinates

| AN | X         | Y         | Z         |
|----|-----------|-----------|-----------|
| 8  | 0.560183  | -1.283954 | -0.685760 |
| 1  | -0.289782 | -1.586118 | -0.293093 |
| 8  | -1.654415 | -2.346643 | 0.384156  |
| 1  | -2.506395 | -1.844140 | 0.354599  |
| 8  | -3.851686 | -0.865619 | 0.404339  |
| 1  | -3.636169 | -0.080773 | -0.165700 |
| 6  | 0.729924  | -1.937730 | -1.927254 |
| 1  | 0.243710  | -1.381731 | -2.742240 |
| 1  | 1.802552  | -1.995783 | -2.139410 |
| 1  | 0.318762  | -2.953945 | -1.905465 |
| 6  | -1.393955 | -2.714099 | 1.726759  |
| 1  | -1.585055 | -1.881215 | 2.414800  |
| 1  | -2.008337 | -3.569927 | 2.028836  |
| 1  | -0.339958 | -2.996181 | 1.800344  |
| 6  | -5.065357 | -1.440428 | -0.048295 |
| 1  | -5.909443 | -0.765882 | 0.130699  |
| 1  | -5.022328 | -1.680308 | -1.117364 |
| 1  | -5.230082 | -2.362944 | 0.512668  |
| 8  | -3.099433 | 0.993241  | -1.277580 |
| 1  | -2.822552 | 1.868540  | -0.905556 |
| 6  | -1.975051 | 0.415580  | -1.925539 |
| 1  | -2.156823 | -0.660090 | -2.023777 |
| 1  | -1.840006 | 0.841951  | -2.925981 |
| 1  | -1.056392 | 0.552693  | -1.340718 |
| 8  | -2.118129 | 3.135914  | -0.074243 |
| 1  | -1.254229 | 2.757507  | 0.221256  |
| 6  | -2.877755 | 3.421020  | 1.088993  |
| 1  | -3.169015 | 2.501601  | 1.614941  |

|   |           |           |           |
|---|-----------|-----------|-----------|
| 1 | -2.315311 | 4.060417  | 1.777305  |
| 1 | -3.781388 | 3.948654  | 0.777514  |
| 8 | -0.050092 | 1.851721  | 0.958843  |
| 1 | 0.804885  | 1.654041  | 0.511478  |
| 6 | -0.567408 | 0.663840  | 1.536389  |
| 1 | -1.438191 | 0.302788  | 0.971061  |
| 1 | 0.190640  | -0.126526 | 1.542329  |
| 1 | -0.878971 | 0.872130  | 2.565113  |
| 8 | 2.242520  | 1.172279  | -0.193869 |
| 1 | 3.119266  | 1.438151  | 0.140358  |
| 6 | 2.313627  | 1.061334  | -1.607415 |
| 1 | 2.662324  | 1.994875  | -2.061541 |
| 1 | 2.983654  | 0.242257  | -1.894556 |
| 1 | 1.306786  | 0.835232  | -1.963549 |
| 6 | 5.700691  | 0.624653  | 0.507816  |
| 1 | 5.091447  | -0.247114 | 0.264294  |
| 1 | 6.590170  | 0.652994  | -0.129916 |
| 1 | 6.002557  | 0.563877  | 1.558460  |
| 8 | 4.876996  | 1.768372  | 0.276417  |
| 1 | 5.322197  | 2.569192  | 0.569490  |
| 6 | 2.938412  | -2.820547 | 0.601188  |
| 1 | 3.884316  | -3.367566 | 0.617946  |
| 1 | 2.500989  | -2.856361 | 1.608093  |
| 1 | 2.253318  | -3.326162 | -0.091712 |
| 8 | 3.215782  | -1.498827 | 0.196733  |
| 1 | 2.370278  | -1.027746 | 0.090859  |

-----

Cartesian coordinates of : BC9\_13

-----

Atomic number (AN) and Cartesian coordinates

| AN | X         | Y         | Z         |
|----|-----------|-----------|-----------|
| 1  | -4.753543 | -0.635335 | 1.762607  |
| 6  | -5.104175 | -0.289024 | 0.784014  |
| 1  | -5.820854 | -1.016666 | 0.386373  |
| 1  | -5.612232 | 0.670009  | 0.911648  |
| 8  | -4.028198 | -0.091470 | -0.114104 |
| 1  | -3.531151 | -0.939761 | -0.201580 |
| 1  | -4.784960 | 2.885694  | -1.270330 |
| 6  | -3.694847 | 2.873540  | -1.382246 |
| 1  | -3.435251 | 2.277383  | -2.263933 |
| 1  | -3.346035 | 3.897823  | -1.534864 |
| 8  | -3.069705 | 2.373404  | -0.214165 |
| 1  | -3.321473 | 1.424903  | -0.108451 |
| 1  | -1.456255 | 4.001960  | 2.149466  |
| 6  | -1.029651 | 4.447761  | 1.244129  |
| 1  | -1.738019 | 5.180937  | 0.842067  |
| 1  | -0.103077 | 4.963455  | 1.507378  |
| 8  | -0.715938 | 3.461981  | 0.277668  |
| 1  | -1.536114 | 2.951816  | 0.067995  |
| 6  | 2.802467  | -2.735136 | -0.390164 |
| 1  | 2.787417  | -2.108872 | -1.290264 |
| 1  | 2.596113  | -3.768904 | -0.676531 |
| 8  | 1.809655  | -2.336464 | 0.539102  |
| 1  | 1.949798  | -1.383026 | 0.724094  |
| 1  | 2.514276  | 4.170273  | -0.611862 |
| 6  | 2.363253  | 3.098575  | -0.779709 |
| 1  | 1.768379  | 2.958401  | -1.688002 |
| 1  | 3.333189  | 2.614074  | -0.918506 |
| 8  | 1.728681  | 2.501623  | 0.344892  |
| 1  | 0.779511  | 2.783003  | 0.368338  |
| 1  | 3.143002  | 0.791923  | 2.699207  |
| 6  | 3.636241  | 0.393807  | 1.807077  |
| 1  | 4.419790  | 1.091904  | 1.488589  |

|   |           |           |           |
|---|-----------|-----------|-----------|
| 1 | 4.094151  | -0.567724 | 2.054532  |
| 8 | 2.700915  | 0.176646  | 0.759737  |
| 1 | 2.207023  | 1.038039  | 0.599495  |
| 1 | -3.398503 | -4.298713 | -1.274308 |
| 6 | -3.338626 | -3.220921 | -1.463756 |
| 1 | -2.623446 | -3.042206 | -2.274211 |
| 1 | -4.322791 | -2.864906 | -1.777876 |
| 8 | -2.979757 | -2.517046 | -0.288644 |
| 1 | -2.063560 | -2.779421 | -0.034478 |
| 1 | -0.395337 | -4.057225 | 2.242332  |
| 6 | -0.548102 | -4.494355 | 1.249479  |
| 1 | 0.242149  | -5.229415 | 1.059172  |
| 1 | -1.513452 | -5.005896 | 1.234785  |
| 8 | -0.571744 | -3.500041 | 0.241309  |
| 1 | 0.261644  | -2.978340 | 0.296285  |
| 6 | 5.546352  | -0.469577 | -1.261346 |
| 1 | 6.386959  | -0.071226 | -1.833655 |
| 1 | 5.861606  | -0.568423 | -0.212934 |
| 1 | 5.311786  | -1.469969 | -1.650455 |
| 8 | 4.466872  | 0.424811  | -1.409662 |
| 1 | 3.773651  | 0.197826  | -0.766051 |
| 1 | 3.801882  | -2.688984 | 0.059997  |

-----  
Cartesian coordinates of : CY9\_3

-----  
Atomic number (AN) and Cartesian coordinates

| AN | X         | Y         | Z         |
|----|-----------|-----------|-----------|
| 1  | 4.079953  | 1.832535  | -1.112674 |
| 6  | 4.042419  | 1.505160  | -0.067107 |
| 1  | 4.294320  | 2.351874  | 0.574959  |
| 1  | 4.786791  | 0.716058  | 0.090764  |
| 8  | 2.743851  | 1.058297  | 0.289471  |
| 1  | 2.474192  | 0.365386  | -0.363891 |
| 1  | -1.456167 | -3.513520 | -1.272958 |
| 6  | -0.419456 | -3.315545 | -1.571440 |
| 1  | -0.404685 | -3.077867 | -2.637547 |
| 1  | 0.175852  | -4.220047 | -1.401541 |
| 8  | 0.107185  | -2.205544 | -0.870113 |
| 1  | 0.170443  | -2.400472 | 0.108041  |
| 1  | 2.019735  | -2.148534 | 2.987578  |
| 6  | 1.814227  | -2.238613 | 1.916257  |
| 1  | 2.399945  | -3.070119 | 1.516848  |
| 1  | 2.120742  | -1.308435 | 1.417019  |
| 8  | 0.442060  | -2.527378 | 1.687719  |
| 1  | -0.095132 | -1.805954 | 2.111352  |
| 1  | -0.300205 | 0.129529  | 0.546426  |
| 6  | -0.323002 | 0.552255  | 1.563487  |
| 1  | -0.923472 | 1.468654  | 1.545605  |
| 1  | 0.699204  | 0.802963  | 1.857931  |
| 8  | -0.836924 | -0.382592 | 2.503526  |
| 1  | -1.796732 | -0.489319 | 2.300567  |
| 1  | -3.631700 | 0.310400  | -2.154260 |
| 6  | -4.144956 | 1.037715  | -1.510866 |
| 1  | -5.098163 | 0.609771  | -1.191457 |
| 1  | -4.344759 | 1.945033  | -2.091286 |
| 8  | -3.389347 | 1.330442  | -0.350798 |
| 1  | -2.522233 | 1.708879  | -0.636733 |
| 6  | 3.285097  | -1.706770 | -1.642469 |
| 8  | 2.213695  | -0.782519 | -1.554344 |
| 1  | 4.150879  | -1.180699 | -2.050921 |
| 1  | 3.034254  | -2.536118 | -2.312599 |
| 1  | 3.549588  | -2.113865 | -0.658007 |
| 1  | 1.385904  | -1.289109 | -1.354474 |

|   |           |           |           |
|---|-----------|-----------|-----------|
| 6 | 0.945380  | 3.851665  | 1.301574  |
| 1 | 0.732478  | 3.262664  | 2.201959  |
| 1 | 1.903665  | 4.367808  | 1.431172  |
| 1 | 0.161577  | 4.602011  | 1.181305  |
| 8 | 0.953491  | 3.045754  | 0.138474  |
| 1 | 1.620298  | 2.325559  | 0.227742  |
| 6 | -0.456837 | 1.132986  | -2.077828 |
| 1 | -0.433149 | 2.600703  | -0.774413 |
| 1 | 0.633273  | 1.218686  | -2.014602 |
| 1 | -0.747600 | 0.152096  | -1.677130 |
| 1 | -0.749217 | 1.187728  | -3.130413 |
| 8 | -1.096211 | 2.184425  | -1.367245 |
| 6 | -2.930826 | -1.701906 | 0.459539  |
| 1 | -2.499885 | -2.545657 | 1.007715  |
| 1 | -3.830853 | -2.049338 | -0.062526 |
| 1 | -2.194086 | -1.356512 | -0.278414 |
| 8 | -3.243644 | -0.682722 | 1.394382  |
| 1 | -3.390588 | 0.140244  | 0.873405  |

-----

Cartesian coordinates of : CY9\_4

-----

Atomic number (AN) and Cartesian coordinates

| AN | X         | Y         | Z         |
|----|-----------|-----------|-----------|
| 6  | -4.383778 | 0.379019  | -1.840023 |
| 1  | -4.607178 | 1.339719  | -2.310562 |
| 1  | -5.321830 | -0.166924 | -1.689848 |
| 1  | -3.739582 | -0.199394 | -2.511604 |
| 8  | -3.744643 | 0.641133  | -0.604172 |
| 1  | -3.486044 | -0.219997 | -0.199084 |
| 6  | -4.019159 | -2.240709 | 1.451774  |
| 1  | -4.918609 | -1.625285 | 1.529500  |
| 1  | -3.434957 | -2.130906 | 2.372318  |
| 1  | -4.318866 | -3.289836 | 1.346572  |
| 8  | -3.292798 | -1.802134 | 0.319696  |
| 1  | -2.467338 | -2.338054 | 0.245422  |
| 6  | -1.499997 | -4.554993 | -0.704567 |
| 1  | -1.059848 | -5.497862 | -0.360254 |
| 1  | -1.079318 | -4.304965 | -1.684776 |
| 1  | -2.579679 | -4.688783 | -0.808404 |
| 8  | -1.281906 | -3.518266 | 0.234603  |
| 1  | -0.312660 | -3.343266 | 0.282278  |
| 6  | 1.986337  | -4.174193 | 1.271927  |
| 1  | 2.882935  | -4.683775 | 0.900772  |
| 1  | 1.271448  | -4.926085 | 1.615544  |
| 1  | 2.265597  | -3.540024 | 2.120726  |
| 8  | 1.364463  | -3.424831 | 0.245395  |
| 1  | 1.987057  | -2.718164 | -0.047917 |
| 6  | 3.995111  | -2.121423 | -1.636911 |
| 1  | 3.592599  | -1.592053 | -2.507697 |
| 1  | 3.868452  | -3.196221 | -1.789030 |
| 1  | 5.065573  | -1.901453 | -1.552551 |
| 8  | 3.307861  | -1.769803 | -0.450912 |
| 1  | 3.388241  | -0.794897 | -0.316980 |
| 6  | 4.862956  | 1.053766  | 0.741427  |
| 1  | 5.479559  | 1.913551  | 0.454864  |
| 1  | 5.500126  | 0.167244  | 0.791773  |
| 1  | 4.436198  | 1.238876  | 1.733381  |
| 8  | 3.854210  | 0.806768  | -0.220620 |
| 1  | 3.220153  | 1.562714  | -0.205431 |
| 6  | 2.803212  | 4.093936  | -0.846510 |
| 1  | 2.206880  | 4.110775  | -1.765799 |
| 1  | 3.853382  | 3.952826  | -1.114097 |
| 1  | 2.695541  | 5.056631  | -0.334828 |

|   |           |          |           |
|---|-----------|----------|-----------|
| 8 | 2.425479  | 3.023797 | -0.001054 |
| 1 | 1.469953  | 3.120200 | 0.226484  |
| 6 | -0.459057 | 3.404725 | 1.993775  |
| 1 | 0.440386  | 3.568215 | 2.591791  |
| 1 | -0.856684 | 2.408464 | 2.219881  |
| 1 | -1.205799 | 4.157708 | 2.273566  |
| 8 | -0.101350 | 3.523715 | 0.629792  |
| 1 | -0.879301 | 3.257366 | 0.083933  |
| 6 | -3.398302 | 3.809715 | -0.086977 |
| 1 | -2.941643 | 4.796324 | 0.026136  |
| 1 | -3.802781 | 3.491250 | 0.881123  |
| 1 | -4.222633 | 3.887658 | -0.805320 |
| 8 | -2.398245 | 2.921887 | -0.550556 |
| 1 | -2.777825 | 2.011242 | -0.572750 |

-----  
Cartesian coordinates of : CY9\_1

-----  
Atomic number (AN) and Cartesian coordinates

| AN | X         | Y         | Z         |
|----|-----------|-----------|-----------|
| 8  | -2.392874 | 0.726598  | -1.804109 |
| 1  | -2.673167 | 0.600904  | -0.857264 |
| 6  | -3.490122 | 1.197153  | -2.564793 |
| 1  | -3.145378 | 1.357328  | -3.588355 |
| 1  | -3.876732 | 2.145154  | -2.171939 |
| 1  | -4.302127 | 0.461877  | -2.578802 |
| 8  | 1.614387  | 0.937460  | 1.879157  |
| 1  | 1.317166  | 1.805394  | 1.518504  |
| 6  | 0.498331  | 0.058027  | 1.861708  |
| 1  | 0.867741  | -0.965625 | 1.969325  |
| 1  | -0.055572 | 0.129236  | 0.914204  |
| 1  | -0.187793 | 0.266582  | 2.688202  |
| 8  | -0.373843 | -2.656740 | -0.213450 |
| 1  | 0.559357  | -2.371141 | -0.372227 |
| 6  | -1.087432 | -2.625789 | -1.443308 |
| 1  | -1.853469 | -3.405219 | -1.413447 |
| 1  | -0.413762 | -2.829054 | -2.282714 |
| 1  | -1.570194 | -1.653628 | -1.604081 |
| 8  | -1.875432 | -1.684163 | 1.718003  |
| 1  | -1.241912 | -2.034445 | 1.039603  |
| 6  | -2.752607 | -2.729855 | 2.100087  |
| 1  | -3.459108 | -2.324910 | 2.827334  |
| 1  | -2.199805 | -3.552813 | 2.565070  |
| 1  | -3.315498 | -3.116861 | 1.242068  |
| 8  | 0.570752  | 3.053711  | 0.628005  |
| 1  | 0.294166  | 2.640521  | -0.231567 |
| 6  | 1.273689  | 4.254095  | 0.365033  |
| 1  | 1.607082  | 4.664050  | 1.320549  |
| 1  | 0.626856  | 4.989995  | -0.124987 |
| 1  | 2.151430  | 4.077845  | -0.268967 |
| 8  | 2.123173  | -2.073309 | -0.872738 |
| 1  | 2.631052  | -1.379232 | -0.380903 |
| 6  | 2.887170  | -3.268335 | -0.883862 |
| 1  | 2.251296  | -4.068495 | -1.270071 |
| 1  | 3.220995  | -3.538838 | 0.123779  |
| 1  | 3.761436  | -3.168050 | -1.536595 |
| 8  | -3.034514 | 0.475749  | 0.721385  |
| 1  | -2.604125 | -0.324684 | 1.116190  |
| 6  | -2.682546 | 1.633277  | 1.467281  |
| 1  | -3.404390 | 2.417240  | 1.226578  |
| 1  | -1.676120 | 1.991193  | 1.218674  |
| 1  | -2.733598 | 1.431260  | 2.542446  |
| 8  | 0.017461  | 1.792004  | -1.603173 |
| 1  | -0.915988 | 1.515526  | -1.767041 |



|   |          |           |           |
|---|----------|-----------|-----------|
| 6 | 0.838914 | 0.634167  | -1.667991 |
| 1 | 1.623963 | 0.716559  | -0.908407 |
| 1 | 1.306608 | 0.538715  | -2.653505 |
| 1 | 0.260287 | -0.271989 | -1.463563 |
| 8 | 3.499258 | -0.312289 | 0.539923  |
| 1 | 2.866269 | 0.192447  | 1.115130  |
| 6 | 4.383984 | 0.597572  | -0.086248 |
| 1 | 4.960177 | 0.048131  | -0.834103 |
| 1 | 5.078010 | 1.033261  | 0.640613  |
| 1 | 3.841617 | 1.407723  | -0.591199 |

-----  
Cartesian coordinates of : BC9\_5

-----  
Atomic number (AN) and Cartesian coordinates

| AN | X         | Y         | Z         |
|----|-----------|-----------|-----------|
| 8  | -1.226291 | -3.027434 | -0.559417 |
| 1  | -1.994465 | -2.413892 | -0.441304 |
| 6  | -0.937389 | -3.652665 | 0.684930  |
| 1  | -0.370049 | -4.562922 | 0.478558  |
| 1  | -1.861151 | -3.924242 | 1.205324  |
| 1  | -0.339573 | -2.997749 | 1.332585  |
| 8  | 3.385975  | -1.792168 | -0.311444 |
| 1  | 2.518095  | -1.852051 | -0.755925 |
| 6  | 3.391326  | -2.656348 | 0.817712  |
| 1  | 4.357340  | -2.538155 | 1.311211  |
| 1  | 3.283517  | -3.701694 | 0.507972  |
| 1  | 2.596169  | -2.396361 | 1.525653  |
| 8  | 0.823360  | -0.675515 | 1.595573  |
| 1  | 0.978354  | -0.934151 | 0.669816  |
| 6  | -0.482559 | -0.139201 | 1.664193  |
| 1  | -0.695291 | 0.082272  | 2.713786  |
| 1  | -1.243416 | -0.846063 | 1.301483  |
| 1  | -0.566583 | 0.789701  | 1.083874  |
| 8  | -0.866025 | 2.624045  | -0.816746 |
| 1  | -0.001704 | 2.466763  | -0.353996 |
| 6  | -1.086356 | 4.019940  | -0.914029 |
| 1  | -2.053017 | 4.173152  | -1.399564 |
| 1  | -0.308862 | 4.498509  | -1.518522 |
| 1  | -1.109068 | 4.494086  | 0.075073  |
| 8  | -2.991412 | 1.224644  | -0.124413 |
| 1  | -2.192610 | 1.700603  | -0.464444 |
| 6  | -3.353559 | 1.798435  | 1.118741  |
| 1  | -4.022013 | 1.102482  | 1.632214  |
| 1  | -3.878434 | 2.749905  | 0.974950  |
| 1  | -2.473769 | 1.969306  | 1.751762  |
| 8  | 0.795763  | -1.485023 | -1.097378 |
| 1  | 0.049883  | -2.141455 | -1.009739 |
| 6  | 0.301838  | -0.294904 | -1.700384 |
| 1  | 0.971722  | 0.526810  | -1.431463 |
| 1  | -0.701835 | -0.054845 | -1.328220 |
| 1  | 0.266565  | -0.390182 | -2.790513 |
| 8  | 3.448167  | 0.886445  | -0.224106 |
| 1  | 3.467196  | -0.086049 | -0.075655 |
| 6  | 3.952269  | 1.145541  | -1.523609 |
| 1  | 3.798012  | 2.206301  | -1.733774 |
| 1  | 3.427197  | 0.553348  | -2.283032 |
| 1  | 5.023065  | 0.924375  | -1.579912 |
| 8  | -3.267124 | -1.397314 | -0.167323 |
| 1  | -3.092841 | -0.422871 | -0.158397 |
| 6  | -4.451262 | -1.642318 | -0.907888 |
| 1  | -4.591531 | -2.723732 | -0.964562 |
| 1  | -4.378493 | -1.240887 | -1.924514 |
| 1  | -5.321268 | -1.199481 | -0.410733 |

|   |          |          |          |
|---|----------|----------|----------|
| 8 | 1.389754 | 2.374158 | 0.485910 |
| 1 | 2.142611 | 1.782648 | 0.233961 |
| 6 | 1.380468 | 2.546845 | 1.893627 |
| 1 | 0.419768 | 2.992993 | 2.169974 |
| 1 | 2.183066 | 3.223002 | 2.207753 |
| 1 | 1.487423 | 1.583873 | 2.403320 |

-----  
Cartesian coordinates of : CY9\_2

-----  
Atomic number (AN) and Cartesian coordinates

| AN | X         | Y         | Z         |
|----|-----------|-----------|-----------|
| 8  | 2.243739  | -1.841198 | -1.170257 |
| 1  | 2.396923  | -0.868069 | -1.223945 |
| 6  | 1.291763  | -2.278189 | -2.126503 |
| 1  | 1.357926  | -3.366702 | -2.182283 |
| 1  | 1.506973  | -1.864895 | -3.117372 |
| 1  | 0.267989  | -2.001508 | -1.840590 |
| 8  | -0.690675 | 1.656802  | 1.784925  |
| 1  | -1.253442 | 2.207121  | 1.194599  |
| 6  | -1.240267 | 0.348989  | 1.801931  |
| 1  | -0.541513 | -0.308610 | 2.321679  |
| 1  | -1.393263 | -0.035943 | 0.785689  |
| 1  | -2.196896 | 0.328968  | 2.336924  |
| 8  | 1.334127  | -2.102157 | 1.298810  |
| 1  | 1.706195  | -2.092046 | 0.381130  |
| 6  | 2.047489  | -1.152672 | 2.072458  |
| 1  | 1.605690  | -1.126523 | 3.071031  |
| 1  | 1.991030  | -0.147472 | 1.635137  |
| 1  | 3.100861  | -1.440360 | 2.166514  |
| 8  | -1.234041 | -2.678876 | 1.009700  |
| 1  | -0.312961 | -2.375464 | 1.200298  |
| 6  | -1.244350 | -4.097585 | 1.015913  |
| 1  | -2.246330 | -4.425312 | 0.730234  |
| 1  | -1.016923 | -4.485220 | 2.014127  |
| 1  | -0.521438 | -4.506820 | 0.300869  |
| 8  | -2.116182 | 2.816354  | -0.162000 |
| 1  | -1.973689 | 2.104080  | -0.832491 |
| 6  | -3.463896 | 3.246238  | -0.181310 |
| 1  | -3.578645 | 4.018271  | 0.581846  |
| 1  | -4.154708 | 2.424552  | 0.045385  |
| 1  | -3.727519 | 3.674679  | -1.154420 |
| 8  | 2.914743  | 0.741783  | -0.978594 |
| 1  | 2.429554  | 1.268547  | -0.296869 |
| 6  | 4.293630  | 0.755101  | -0.645683 |
| 1  | 4.811207  | 0.090685  | -1.340512 |
| 1  | 4.461756  | 0.397078  | 0.376914  |
| 1  | 4.711332  | 1.763329  | -0.742833 |
| 8  | -2.350831 | -1.566227 | -1.123181 |
| 1  | -1.872949 | -1.994101 | -0.369524 |
| 6  | -3.683007 | -1.317818 | -0.705149 |
| 1  | -4.211604 | -0.845983 | -1.536423 |
| 1  | -3.712952 | -0.646113 | 0.162736  |
| 1  | -4.196532 | -2.250544 | -0.447727 |
| 8  | -1.380172 | 0.846831  | -1.770379 |
| 1  | -1.722804 | -0.066310 | -1.626741 |
| 6  | 0.024185  | 0.843371  | -1.571664 |
| 1  | 0.346726  | 1.874120  | -1.403046 |
| 1  | 0.551849  | 0.456346  | -2.449873 |
| 1  | 0.305449  | 0.246541  | -0.690407 |
| 8  | 1.770209  | 2.223178  | 0.911049  |
| 1  | 0.925778  | 1.912989  | 1.317443  |
| 6  | 1.577529  | 3.573138  | 0.512236  |
| 1  | 2.319594  | 3.809349  | -0.255197 |

|   |          |          |          |
|---|----------|----------|----------|
| 1 | 1.716689 | 4.251986 | 1.360192 |
| 1 | 0.574850 | 3.723998 | 0.093546 |

-----  
Cartesian coordinates of : BC9\_3

-----  
Atomic number (AN) and Cartesian coordinates

| AN | X         | Y         | Z         |
|----|-----------|-----------|-----------|
| 8  | -2.136655 | -1.348099 | 0.700527  |
| 1  | -2.493922 | -0.509015 | 0.291293  |
| 6  | -2.968839 | -1.739693 | 1.783392  |
| 1  | -2.477774 | -2.568919 | 2.297618  |
| 1  | -3.952340 | -2.066279 | 1.428135  |
| 1  | -3.098823 | -0.914391 | 2.491403  |
| 8  | 0.869613  | -0.950022 | -1.913093 |
| 1  | 0.390267  | -1.775598 | -1.685140 |
| 6  | 0.101450  | 0.143509  | -1.434302 |
| 1  | 0.662851  | 1.061433  | -1.625625 |
| 1  | -0.084200 | 0.069200  | -0.352172 |
| 1  | -0.860640 | 0.212392  | -1.953618 |
| 8  | 0.355105  | 2.428173  | 1.116988  |
| 1  | 1.282323  | 2.175342  | 0.880152  |
| 6  | -0.151131 | 1.491693  | 2.058663  |
| 1  | -1.146063 | 1.155798  | 1.739593  |
| 1  | -0.237717 | 1.957267  | 3.045594  |
| 1  | 0.495537  | 0.611198  | 2.136149  |
| 8  | -1.428621 | 2.729758  | -0.736457 |
| 1  | -0.675066 | 2.641458  | -0.087178 |
| 6  | -1.961702 | 4.040375  | -0.635791 |
| 1  | -2.833014 | 4.100695  | -1.292029 |
| 1  | -1.227146 | 4.784713  | -0.959501 |
| 1  | -2.273964 | 4.268355  | 0.389801  |
| 8  | -0.751650 | -2.934024 | -1.022348 |
| 1  | -1.389294 | -2.452666 | -0.457471 |
| 6  | -0.436539 | -4.178274 | -0.415027 |
| 1  | 0.399657  | -4.612267 | -0.967117 |
| 1  | -1.286359 | -4.867655 | -0.474421 |
| 1  | -0.145125 | -4.044348 | 0.633363  |
| 8  | 2.803018  | 1.585849  | 0.653765  |
| 1  | 2.997197  | 0.875476  | -0.009356 |
| 6  | 3.565761  | 1.366584  | 1.827235  |
| 1  | 3.285754  | 2.133344  | 2.553452  |
| 1  | 4.638117  | 1.453863  | 1.621667  |
| 1  | 3.363541  | 0.379347  | 2.260259  |
| 8  | -3.136885 | 0.807368  | -0.330932 |
| 1  | -2.496269 | 1.561893  | -0.459984 |
| 6  | -3.859204 | 0.599380  | -1.532918 |
| 1  | -4.362009 | -0.368350 | -1.464045 |
| 1  | -3.193941 | 0.587579  | -2.404072 |
| 1  | -4.616797 | 1.378333  | -1.672221 |
| 8  | 0.324338  | -1.924226 | 1.932638  |
| 1  | -0.401985 | -1.572379 | 1.390366  |
| 6  | 1.541997  | -1.819494 | 1.224080  |
| 1  | 2.339219  | -2.159838 | 1.888874  |
| 1  | 1.758529  | -0.784466 | 0.924712  |
| 1  | 1.551357  | -2.442641 | 0.320030  |
| 8  | 3.303744  | -0.353307 | -1.079376 |
| 1  | 2.435010  | -0.719575 | -1.380202 |
| 6  | 4.047099  | 0.040919  | -2.221588 |
| 1  | 4.938871  | 0.567041  | -1.874577 |
| 1  | 3.467091  | 0.713394  | -2.864140 |
| 1  | 4.357712  | -0.831483 | -2.805762 |

-----

Cartesian coordinates of : BC9\_6

-----  
Atomic number (AN) and Cartesian coordinates

| AN | X         | Y         | Z         |
|----|-----------|-----------|-----------|
| 8  | 0.234535  | -0.492876 | -2.167002 |
| 1  | 1.069760  | -0.954700 | -1.993105 |
| 6  | -0.051919 | 0.326201  | -1.050946 |
| 1  | -1.131651 | 0.323434  | -0.877162 |
| 1  | 0.268750  | 1.364908  | -1.217867 |
| 1  | 0.433470  | -0.038219 | -0.136514 |
| 8  | 1.379859  | 2.187408  | 1.067547  |
| 1  | 1.997856  | 1.796704  | 0.403735  |
| 6  | 2.113292  | 2.764896  | 2.129793  |
| 1  | 1.400359  | 3.249707  | 2.801074  |
| 1  | 2.820270  | 3.518582  | 1.766089  |
| 1  | 2.666778  | 2.003342  | 2.693680  |
| 8  | 1.278772  | -2.130372 | 1.199110  |
| 1  | 0.304882  | -2.187415 | 1.025043  |
| 6  | 1.493844  | -1.178138 | 2.231982  |
| 1  | 2.535146  | -1.262798 | 2.551339  |
| 1  | 0.846123  | -1.387759 | 3.090937  |
| 1  | 1.306538  | -0.152377 | 1.887169  |
| 8  | -1.340245 | -2.178021 | 0.995482  |
| 1  | -1.978411 | -1.742477 | 0.372273  |
| 6  | -2.041865 | -2.623800 | 2.140426  |
| 1  | -1.358733 | -3.234101 | 2.736648  |
| 1  | -2.906228 | -3.234480 | 1.860244  |
| 1  | -2.388035 | -1.780031 | 2.751758  |
| 8  | -3.243323 | 1.601295  | -0.587644 |
| 1  | -2.530463 | 1.950159  | -0.005830 |
| 6  | -3.114216 | 2.156391  | -1.885095 |
| 1  | -3.958660 | 1.804086  | -2.481192 |
| 1  | -2.182820 | 1.838710  | -2.372037 |
| 1  | -3.145308 | 3.250621  | -1.850650 |
| 8  | 2.578313  | -1.509799 | -0.950726 |
| 1  | 2.094971  | -1.808951 | -0.124866 |
| 6  | 3.503400  | -2.504959 | -1.361431 |
| 1  | 4.015864  | -2.139181 | -2.253456 |
| 1  | 2.988681  | -3.439180 | -1.607742 |
| 1  | 4.246640  | -2.699509 | -0.581006 |
| 8  | -3.190272 | -1.111146 | -0.546856 |
| 1  | -3.289628 | -0.133787 | -0.487496 |
| 6  | -3.051661 | -1.464665 | -1.919559 |
| 1  | -2.985329 | -2.553265 | -1.970760 |
| 1  | -2.139991 | -1.039912 | -2.355960 |
| 1  | -3.928446 | -1.140956 | -2.490783 |
| 8  | -1.318469 | 2.208985  | 1.200697  |
| 1  | -0.361218 | 2.292850  | 1.007946  |
| 6  | -1.480416 | 1.141081  | 2.121338  |
| 1  | -2.537300 | 1.102545  | 2.397876  |
| 1  | -0.886710 | 1.309029  | 3.028226  |
| 1  | -1.193641 | 0.177332  | 1.679915  |
| 8  | 3.091101  | 1.138755  | -0.690218 |
| 1  | 3.027734  | 0.160450  | -0.734612 |
| 6  | 2.996357  | 1.657288  | -2.010467 |
| 1  | 2.800981  | 2.729213  | -1.932242 |
| 1  | 2.177790  | 1.185973  | -2.567001 |
| 1  | 3.936916  | 1.511844  | -2.553036 |

-----  
Cartesian coordinates of : BC9\_2-----  
Atomic number (AN) and Cartesian coordinates

| AN | X         | Y         | Z         |
|----|-----------|-----------|-----------|
| 8  | -0.519330 | 2.881856  | 0.165508  |
| 1  | 0.328580  | 2.610443  | -0.307114 |
| 6  | -0.673939 | 4.290829  | 0.097709  |
| 1  | -1.652060 | 4.544564  | 0.512141  |
| 1  | -0.625431 | 4.641719  | -0.938500 |
| 1  | 0.099133  | 4.798416  | 0.683876  |
| 8  | -1.325728 | -1.204725 | -1.750864 |
| 1  | -1.694091 | -0.393635 | -1.338464 |
| 6  | -2.388157 | -2.118203 | -1.983012 |
| 1  | -1.950058 | -3.034124 | -2.388023 |
| 1  | -3.092148 | -1.714235 | -2.719242 |
| 1  | -2.914068 | -2.342782 | -1.049355 |
| 8  | 2.789205  | -1.576568 | 0.380464  |
| 1  | 1.934343  | -1.889102 | -0.027765 |
| 6  | 3.803985  | -2.506741 | 0.039876  |
| 1  | 4.756768  | -2.115940 | 0.405214  |
| 1  | 3.871582  | -2.646613 | -1.044501 |
| 1  | 3.618978  | -3.477125 | 0.513846  |
| 8  | -0.811563 | 0.728279  | 1.894424  |
| 1  | -0.841165 | 1.625271  | 1.518268  |
| 6  | 0.337120  | 0.094640  | 1.345953  |
| 1  | 0.426267  | -0.892135 | 1.805050  |
| 1  | 1.249777  | 0.664132  | 1.554268  |
| 1  | 0.237614  | -0.034883 | 0.259057  |
| 8  | 3.525965  | 0.912709  | 0.010885  |
| 1  | 3.237504  | -0.031415 | 0.125194  |
| 6  | 4.148537  | 1.357821  | 1.201280  |
| 1  | 4.397594  | 2.413719  | 1.077009  |
| 1  | 5.074057  | 0.802570  | 1.391325  |
| 1  | 3.488015  | 1.249816  | 2.070495  |
| 8  | -2.595658 | -1.226171 | 1.070370  |
| 1  | -2.043173 | -0.448545 | 1.281605  |
| 6  | -3.498822 | -1.417431 | 2.137850  |
| 1  | -4.026318 | -2.358675 | 1.964240  |
| 1  | -4.243561 | -0.610384 | 2.192037  |
| 1  | -2.982724 | -1.478760 | 3.103869  |
| 8  | 0.636437  | -2.584323 | -0.664616 |
| 1  | -0.023166 | -2.003434 | -1.120835 |
| 6  | -0.067925 | -3.365160 | 0.295131  |
| 1  | 0.611663  | -3.582382 | 1.125645  |
| 1  | -0.390575 | -4.314162 | -0.148615 |
| 1  | -0.940366 | -2.821238 | 0.674714  |
| 8  | -2.350940 | 1.170052  | -0.896882 |
| 1  | -1.711057 | 1.851601  | -0.605958 |
| 6  | -3.561111 | 1.347007  | -0.181380 |
| 1  | -4.166193 | 0.449938  | -0.323003 |
| 1  | -4.110730 | 2.220121  | -0.552350 |
| 1  | -3.375643 | 1.466153  | 0.894175  |
| 8  | 1.512026  | 2.110316  | -1.181424 |
| 1  | 2.318010  | 1.779141  | -0.708338 |
| 6  | 1.111201  | 1.118349  | -2.120080 |
| 1  | 0.033533  | 1.206247  | -2.285624 |
| 1  | 1.319243  | 0.109088  | -1.744603 |
| 1  | 1.631235  | 1.258560  | -3.072598 |

Cartesian coordinates of : BC9\_8

Atomic number (AN) and Cartesian coordinates

| AN | X        | Y         | Z        |
|----|----------|-----------|----------|
| 8  | 2.651456 | -0.711101 | 1.160068 |
| 1  | 1.829253 | -0.459408 | 1.639615 |

|   |           |           |           |
|---|-----------|-----------|-----------|
| 6 | 2.524357  | -2.072615 | 0.766743  |
| 1 | 3.413636  | -2.333781 | 0.187363  |
| 1 | 1.632817  | -2.237926 | 0.148794  |
| 1 | 2.484370  | -2.726814 | 1.645831  |
| 8 | -0.302254 | -3.057103 | -0.975459 |
| 1 | -1.167861 | -2.617536 | -0.862635 |
| 6 | -0.316404 | -4.271641 | -0.258487 |
| 1 | 0.660902  | -4.744228 | -0.387220 |
| 1 | -1.083978 | -4.961148 | -0.631515 |
| 1 | -0.484139 | -4.113526 | 0.816590  |
| 8 | -1.022839 | 2.616887  | -0.903574 |
| 1 | -0.282356 | 2.107344  | -1.358716 |
| 6 | -1.710061 | 3.436530  | -1.834342 |
| 1 | -2.527295 | 3.933751  | -1.307861 |
| 1 | -2.126979 | 2.839553  | -2.652949 |
| 1 | -1.044896 | 4.199259  | -2.251906 |
| 8 | 0.242004  | -0.251149 | 2.299722  |
| 1 | -0.185275 | 0.536768  | 1.909636  |
| 6 | -0.582655 | -1.397585 | 2.172085  |
| 1 | -0.123993 | -2.191510 | 2.767107  |
| 1 | -0.654733 | -1.729849 | 1.129642  |
| 1 | -1.590344 | -1.209186 | 2.557102  |
| 8 | 3.208693  | 0.906819  | -0.874055 |
| 1 | 3.030704  | 0.341835  | -0.079360 |
| 6 | 4.145283  | 0.240293  | -1.703162 |
| 1 | 4.397160  | 0.908268  | -2.528966 |
| 1 | 3.729594  | -0.687842 | -2.116701 |
| 1 | 5.061286  | 0.006427  | -1.149810 |
| 8 | 0.074087  | 2.391842  | 1.612480  |
| 1 | -0.248937 | 2.771334  | 0.778283  |
| 6 | 1.480919  | 2.570645  | 1.703624  |
| 1 | 1.831867  | 1.955470  | 2.535107  |
| 1 | 1.734918  | 3.616744  | 1.908321  |
| 1 | 1.991714  | 2.250375  | 0.787814  |
| 8 | 0.764348  | 1.085492  | -1.900559 |
| 1 | 1.699229  | 1.185677  | -1.596210 |
| 6 | 0.333006  | -0.200801 | -1.458772 |
| 1 | -0.676363 | -0.370091 | -1.843291 |
| 1 | 0.307755  | -0.257871 | -0.361486 |
| 1 | 0.982866  | -0.991639 | -1.842406 |
| 8 | -2.672453 | -1.733515 | -0.487609 |
| 1 | -2.501674 | -0.896932 | -0.005119 |
| 6 | -3.552368 | -1.454235 | -1.560738 |
| 1 | -3.682487 | -2.374672 | -2.133124 |
| 1 | -3.145772 | -0.682864 | -2.227716 |
| 1 | -4.532340 | -1.125963 | -1.195906 |
| 8 | -2.182725 | 0.679113  | 0.651736  |
| 1 | -1.819508 | 1.367220  | 0.054286  |
| 6 | -2.925492 | 1.303322  | 1.690364  |
| 1 | -3.362389 | 0.511243  | 2.302537  |
| 1 | -3.737468 | 1.917707  | 1.285099  |
| 1 | -2.271326 | 1.922062  | 2.313874  |

-----  
Cartesian coordinates of : BC9\_4

-----  
Atomic number (AN) and Cartesian coordinates

| AN | X        | Y        | Z        |
|----|----------|----------|----------|
| 8  | 2.628289 | 1.081433 | 0.455444 |
| 1  | 1.834408 | 1.294910 | 1.036236 |
| 6  | 3.719173 | 1.910177 | 0.832352 |
| 1  | 4.564665 | 1.669978 | 0.184126 |
| 1  | 4.006974 | 1.730870 | 1.873018 |
| 1  | 3.468292 | 2.969134 | 0.707531 |

|   |           |           |           |
|---|-----------|-----------|-----------|
| 8 | 0.927223  | -2.866797 | 0.607038  |
| 1 | 1.799143  | -2.557240 | 0.279859  |
| 6 | 0.583226  | -2.058232 | 1.724096  |
| 1 | -0.475698 | -2.214871 | 1.944846  |
| 1 | 0.734739  | -0.992470 | 1.509178  |
| 1 | 1.172480  | -2.332995 | 2.604805  |
| 8 | -2.667490 | -0.822401 | 0.356739  |
| 1 | -2.119111 | -1.497114 | -0.117454 |
| 6 | -3.203723 | 0.105395  | -0.578755 |
| 1 | -4.117541 | 0.525238  | -0.150735 |
| 1 | -3.461209 | -0.399615 | -1.516627 |
| 1 | -2.501739 | 0.921032  | -0.795830 |
| 8 | -1.279172 | 2.657631  | -1.990165 |
| 1 | -0.384069 | 2.271499  | -1.972044 |
| 6 | -1.873777 | 2.351535  | -3.232597 |
| 1 | -2.889603 | 2.753794  | -3.220607 |
| 1 | -1.934179 | 1.267091  | -3.404436 |
| 1 | -1.331885 | 2.805470  | -4.071443 |
| 8 | 3.168237  | -1.525459 | -0.122691 |
| 1 | 3.008560  | -0.620347 | 0.217256  |
| 6 | 3.623385  | -1.417652 | -1.462853 |
| 1 | 3.639952  | -2.421960 | -1.890345 |
| 1 | 4.639009  | -1.007327 | -1.499903 |
| 1 | 2.959192  | -0.785644 | -2.065510 |
| 8 | 0.967480  | 1.052371  | -1.779977 |
| 1 | 1.687271  | 1.233515  | -1.149082 |
| 6 | 0.227166  | -0.052100 | -1.277558 |
| 1 | -0.558347 | -0.288570 | -1.998838 |
| 1 | -0.245085 | 0.182299  | -0.311884 |
| 1 | 0.861867  | -0.937010 | -1.157426 |
| 8 | 0.560878  | 1.822566  | 1.769031  |
| 1 | -0.135356 | 1.187323  | 2.082785  |
| 6 | -0.095555 | 2.825571  | 0.999407  |
| 1 | 0.642350  | 3.292855  | 0.340899  |
| 1 | -0.519714 | 3.595372  | 1.652947  |
| 1 | -0.888076 | 2.400762  | 0.373579  |
| 8 | -1.498622 | 0.339182  | 2.405741  |
| 1 | -1.898209 | -0.149113 | 1.637930  |
| 6 | -2.508652 | 1.141617  | 2.995127  |
| 1 | -2.053213 | 1.708555  | 3.810211  |
| 1 | -3.311589 | 0.519602  | 3.404314  |
| 1 | -2.935122 | 1.847235  | 2.270735  |
| 8 | -1.259598 | -2.695914 | -0.875281 |
| 1 | -0.374835 | -2.787560 | -0.441995 |
| 6 | -1.945676 | -3.933624 | -0.759881 |
| 1 | -2.960544 | -3.787877 | -1.135577 |
| 1 | -1.999833 | -4.264995 | 0.283579  |
| 1 | -1.455135 | -4.708859 | -1.357164 |

-----  
 Cartesian coordinates of : BC9\_9

-----  
 Atomic number (AN) and Cartesian coordinates

| AN | X         | Y         | Z         |
|----|-----------|-----------|-----------|
| 8  | -1.423215 | -0.626487 | 2.189208  |
| 1  | -1.867125 | -0.898352 | 1.362020  |
| 6  | -1.541091 | 0.787846  | 2.277656  |
| 1  | -1.078063 | 1.099105  | 3.216239  |
| 1  | -2.591837 | 1.099223  | 2.278229  |
| 1  | -1.022606 | 1.285856  | 1.447832  |
| 8  | 1.074109  | -1.538560 | -1.586155 |
| 1  | 0.355273  | -2.201441 | -1.590945 |
| 6  | 0.527922  | -0.321107 | -1.114174 |
| 1  | 1.350248  | 0.389430  | -0.993894 |

|   |           |           |           |
|---|-----------|-----------|-----------|
| 1 | 0.038809  | -0.442806 | -0.133768 |
| 1 | -0.197554 | 0.096737  | -1.822717 |
| 8 | -0.121856 | 2.725203  | -0.414425 |
| 1 | 0.581908  | 2.297589  | 0.149490  |
| 6 | -0.434124 | 3.981474  | 0.167935  |
| 1 | -1.260418 | 4.419158  | -0.397265 |
| 1 | 0.425547  | 4.657566  | 0.118730  |
| 1 | -0.740090 | 3.871252  | 1.215164  |
| 8 | -2.332467 | 1.505001  | -1.060258 |
| 1 | -1.472062 | 1.920901  | -0.773792 |
| 6 | -2.532339 | 1.775178  | -2.438663 |
| 1 | -3.448989 | 1.270435  | -2.751842 |
| 1 | -1.698591 | 1.405481  | -3.046711 |
| 1 | -2.648160 | 2.850392  | -2.610507 |
| 8 | -1.176372 | -2.990641 | -1.060868 |
| 1 | -1.833474 | -2.276708 | -0.954575 |
| 6 | -0.921408 | -3.525106 | 0.228223  |
| 1 | -0.138924 | -4.279384 | 0.125001  |
| 1 | -1.815693 | -4.000865 | 0.646695  |
| 1 | -0.572031 | -2.752126 | 0.925986  |
| 8 | 1.691980  | 1.805595  | 1.202294  |
| 1 | 1.530698  | 0.950284  | 1.670935  |
| 6 | 3.040070  | 1.826851  | 0.743299  |
| 1 | 3.122256  | 2.615322  | -0.010212 |
| 1 | 3.323025  | 0.867912  | 0.292650  |
| 1 | 3.721625  | 2.059174  | 1.568552  |
| 8 | -2.754371 | -0.902022 | -0.214810 |
| 1 | -2.548893 | 0.009006  | -0.580171 |
| 6 | -4.154278 | -0.991794 | 0.019530  |
| 1 | -4.353837 | -1.950433 | 0.502447  |
| 1 | -4.713737 | -0.945908 | -0.920630 |
| 1 | -4.492069 | -0.184419 | 0.678169  |
| 8 | 1.304422  | -0.575070 | 2.349009  |
| 1 | 0.352830  | -0.803419 | 2.340868  |
| 6 | 2.068850  | -1.642586 | 1.798820  |
| 1 | 3.100373  | -1.301035 | 1.700771  |
| 1 | 1.710288  | -1.921919 | 0.801362  |
| 1 | 2.039848  | -2.517620 | 2.457536  |
| 8 | 3.711152  | -1.083681 | -0.929502 |
| 1 | 2.851959  | -1.489462 | -1.141363 |
| 6 | 4.163483  | -0.407745 | -2.083116 |
| 1 | 5.103123  | 0.088728  | -1.828312 |
| 1 | 3.446683  | 0.355739  | -2.418578 |
| 1 | 4.350100  | -1.096168 | -2.916398 |

-----

Cartesian coordinates of : BC9\_10

-----

Atomic number (AN) and Cartesian coordinates

| AN | X         | Y         | Z         |
|----|-----------|-----------|-----------|
| 8  | -0.622270 | -0.787839 | 1.468006  |
| 1  | -0.655662 | -0.674539 | 0.497419  |
| 6  | 0.587538  | -0.226225 | 1.936172  |
| 1  | 0.594522  | -0.312008 | 3.025394  |
| 1  | 0.675832  | 0.834182  | 1.662456  |
| 1  | 1.458274  | -0.764974 | 1.535256  |
| 8  | 1.046406  | -2.837255 | -0.400711 |
| 1  | 0.285845  | -2.333098 | -0.748608 |
| 6  | 0.638800  | -3.669835 | 0.678503  |
| 1  | 1.542563  | -4.103348 | 1.111108  |
| 1  | -0.000835 | -4.482547 | 0.318163  |
| 1  | 0.106794  | -3.090516 | 1.439573  |
| 8  | 0.944344  | 2.754655  | -0.032797 |
| 1  | 1.719859  | 2.157139  | 0.097754  |



|   |           |           |           |
|---|-----------|-----------|-----------|
| 6 | 1.189811  | 3.580099  | -1.156976 |
| 1 | 0.278506  | 4.146563  | -1.361499 |
| 1 | 1.441879  | 2.986503  | -2.044716 |
| 1 | 2.006452  | 4.283199  | -0.959749 |
| 8 | -0.636943 | -0.896260 | -1.316330 |
| 1 | -1.561184 | -0.616953 | -1.537190 |
| 6 | 0.260728  | 0.043834  | -1.897557 |
| 1 | 1.177147  | 0.058396  | -1.297158 |
| 1 | -0.177845 | 1.046447  | -1.893285 |
| 1 | 0.507565  | -0.240991 | -2.926035 |
| 8 | -2.862913 | 0.415048  | -1.639058 |
| 1 | -2.611581 | 0.989440  | -0.885095 |
| 6 | -4.265602 | 0.212140  | -1.675835 |
| 1 | -4.460855 | -0.642402 | -2.327709 |
| 1 | -4.771564 | 1.090585  | -2.092049 |
| 1 | -4.654861 | 0.004306  | -0.674879 |
| 8 | 3.228681  | -1.332235 | -0.307787 |
| 1 | 2.420592  | -1.899772 | -0.267247 |
| 6 | 3.914624  | -1.613001 | -1.517426 |
| 1 | 4.751190  | -0.915417 | -1.595618 |
| 1 | 3.260804  | -1.480454 | -2.387603 |
| 1 | 4.304524  | -2.636015 | -1.517504 |
| 8 | -1.560069 | 1.820758  | 0.281522  |
| 1 | -0.642373 | 2.140576  | 0.134284  |
| 6 | -1.997515 | 2.233943  | 1.564460  |
| 1 | -3.059502 | 1.994542  | 1.646261  |
| 1 | -1.856082 | 3.311442  | 1.703585  |
| 1 | -1.459007 | 1.698121  | 2.357747  |
| 8 | -3.393008 | -0.513643 | 1.325247  |
| 1 | -2.471465 | -0.340254 | 1.580623  |
| 6 | -3.442088 | -1.842920 | 0.852146  |
| 1 | -4.492237 | -2.101738 | 0.693736  |
| 1 | -3.013114 | -2.548933 | 1.573295  |
| 1 | -2.910772 | -1.955206 | -0.105402 |
| 8 | 3.107482  | 1.247510  | 0.292932  |
| 1 | 3.117696  | 0.288752  | 0.052425  |
| 6 | 3.705327  | 1.407146  | 1.567713  |
| 1 | 3.645366  | 2.464735  | 1.833735  |
| 1 | 4.757857  | 1.105500  | 1.548679  |
| 1 | 3.182255  | 0.821754  | 2.334459  |

-----  
Cartesian coordinates of : BC9\_11

-----  
Atomic number (AN) and Cartesian coordinates

| AN | X         | Y         | Z         |
|----|-----------|-----------|-----------|
| 8  | 1.454556  | 2.333878  | -0.769445 |
| 1  | 0.565040  | 2.322315  | -0.329809 |
| 6  | 1.760206  | 3.669395  | -1.129220 |
| 1  | 2.734736  | 3.670123  | -1.621778 |
| 1  | 1.810557  | 4.323355  | -0.250128 |
| 1  | 1.013888  | 4.068223  | -1.824676 |
| 8  | -1.189908 | -0.396907 | 1.494950  |
| 1  | -1.067762 | -1.004918 | 0.744657  |
| 6  | -2.399739 | -0.690040 | 2.163718  |
| 1  | -2.498953 | 0.023227  | 2.985853  |
| 1  | -2.398828 | -1.703692 | 2.586167  |
| 1  | -3.269584 | -0.573614 | 1.505293  |
| 8  | -3.069496 | -1.511088 | -1.149642 |
| 1  | -2.122658 | -1.749657 | -1.224160 |
| 6  | -3.779351 | -2.582192 | -0.553812 |
| 1  | -4.770784 | -2.214227 | -0.281917 |
| 1  | -3.278774 | -2.942309 | 0.353522  |
| 1  | -3.893383 | -3.416860 | -1.253800 |

|   |           |           |           |
|---|-----------|-----------|-----------|
| 8 | 3.596755  | -1.381514 | -0.496363 |
| 1 | 3.428640  | -0.614167 | 0.101739  |
| 6 | 3.884070  | -0.860350 | -1.783001 |
| 1 | 3.788199  | -1.672007 | -2.507935 |
| 1 | 4.906771  | -0.470024 | -1.826556 |
| 1 | 3.184508  | -0.059209 | -2.053427 |
| 8 | -0.874205 | 2.450616  | 0.452957  |
| 1 | -1.578667 | 1.797865  | 0.237303  |
| 6 | -0.882750 | 2.709602  | 1.845219  |
| 1 | -0.063939 | 3.402020  | 2.059025  |
| 1 | -0.735007 | 1.786784  | 2.415757  |
| 1 | -1.825422 | 3.180427  | 2.146794  |
| 8 | 1.631042  | -3.122836 | -0.071360 |
| 1 | 2.398163  | -2.558211 | -0.335942 |
| 6 | 1.500125  | -3.002834 | 1.338929  |
| 1 | 0.801733  | -3.771387 | 1.677255  |
| 1 | 1.103755  | -2.017955 | 1.622988  |
| 1 | 2.463927  | -3.160652 | 1.833800  |
| 8 | -0.415833 | -1.714730 | -0.863685 |
| 1 | 0.292432  | -2.386752 | -0.669344 |
| 6 | 0.231720  | -0.508623 | -1.263236 |
| 1 | -0.519308 | 0.285922  | -1.285038 |
| 1 | 0.678040  | -0.610950 | -2.258016 |
| 1 | 1.012690  | -0.230272 | -0.545031 |
| 8 | 2.964637  | 0.835239  | 0.842865  |
| 1 | 2.528408  | 1.439732  | 0.197269  |
| 6 | 2.118425  | 0.754429  | 1.980868  |
| 1 | 2.530335  | -0.004981 | 2.649894  |
| 1 | 1.091679  | 0.471708  | 1.710326  |
| 1 | 2.095664  | 1.711317  | 2.516301  |
| 8 | -3.010775 | 1.108892  | -0.469747 |
| 1 | -3.090175 | 0.144825  | -0.629777 |
| 6 | -3.370512 | 1.799454  | -1.654052 |
| 1 | -3.133703 | 2.854837  | -1.503042 |
| 1 | -4.442117 | 1.701737  | -1.859885 |
| 1 | -2.807444 | 1.431991  | -2.520411 |

-----  
Cartesian coordinates of : BC9\_7

-----  
Atomic number (AN) and Cartesian coordinates

| AN | X         | Y         | Z         |
|----|-----------|-----------|-----------|
| 8  | 3.158843  | -0.189616 | 0.752859  |
| 1  | 2.600118  | -0.974531 | 0.579997  |
| 6  | 3.243154  | 0.075618  | 2.142414  |
| 1  | 3.746511  | 1.037939  | 2.261874  |
| 1  | 3.837896  | -0.693873 | 2.648121  |
| 1  | 2.247819  | 0.121914  | 2.595325  |
| 8  | -2.371538 | 2.586754  | -0.473215 |
| 1  | -1.386503 | 2.612307  | -0.474501 |
| 6  | -2.851865 | 3.751154  | 0.175462  |
| 1  | -3.935300 | 3.654674  | 0.273994  |
| 1  | -2.629583 | 4.648835  | -0.411012 |
| 1  | -2.414842 | 3.864039  | 1.175390  |
| 8  | -3.135237 | -1.890075 | -1.187920 |
| 1  | -3.384960 | -1.054495 | -0.722168 |
| 6  | -4.072730 | -2.905883 | -0.885892 |
| 1  | -3.756003 | -3.816140 | -1.398627 |
| 1  | -5.072995 | -2.635147 | -1.240405 |
| 1  | -4.119506 | -3.107560 | 0.191434  |
| 8  | 2.142631  | -2.285570 | -0.691586 |
| 1  | 1.188431  | -2.301899 | -0.885339 |
| 6  | 2.853706  | -1.894459 | -1.855244 |
| 1  | 3.907019  | -1.817689 | -1.577713 |

|   |           |           |           |
|---|-----------|-----------|-----------|
| 1 | 2.517414  | -0.915488 | -2.221998 |
| 1 | 2.750938  | -2.636727 | -2.654591 |
| 8 | 2.471610  | 1.565566  | -1.110725 |
| 1 | 2.754447  | 0.957226  | -0.384200 |
| 6 | 3.607748  | 1.995758  | -1.835408 |
| 1 | 3.261740  | 2.617784  | -2.663215 |
| 1 | 4.160520  | 1.142036  | -2.245674 |
| 1 | 4.285783  | 2.588182  | -1.210019 |
| 8 | -3.529339 | 0.290174  | 0.279450  |
| 1 | -3.177515 | 1.128093  | -0.100635 |
| 6 | -2.844734 | 0.054636  | 1.500288  |
| 1 | -3.276039 | -0.838766 | 1.957904  |
| 1 | -2.974494 | 0.896595  | 2.190362  |
| 1 | -1.771304 | -0.116959 | 1.346596  |
| 8 | -0.527014 | -1.651523 | -0.826613 |
| 1 | -1.459559 | -1.947886 | -0.963068 |
| 6 | -0.422909 | -0.318820 | -1.325571 |
| 1 | 0.601848  | 0.026255  | -1.160499 |
| 1 | -1.108581 | 0.353753  | -0.797886 |
| 1 | -0.644923 | -0.285395 | -2.397010 |
| 8 | 0.549741  | -1.348981 | 1.718935  |
| 1 | 0.079515  | -1.536963 | 0.885134  |
| 6 | 0.951601  | -2.575108 | 2.302976  |
| 1 | 1.496697  | -2.336817 | 3.220062  |
| 1 | 1.613482  | -3.140319 | 1.634878  |
| 1 | 0.089996  | -3.199628 | 2.569734  |
| 8 | 0.250906  | 2.694847  | -0.041632 |
| 1 | 1.015071  | 2.459012  | -0.606425 |
| 6 | 0.442249  | 2.051854  | 1.210448  |
| 1 | -0.466843 | 2.198803  | 1.800646  |
| 1 | 1.287495  | 2.494248  | 1.751070  |
| 1 | 0.614067  | 0.973489  | 1.099186  |

-----

Cartesian coordinates of the methanol decamer

Cartesian coordinates of : BC10\_5

-----

Atomic number (AN) and Cartesian coordinates

| AN | X         | Y         | Z         |
|----|-----------|-----------|-----------|
| 8  | -2.751361 | -2.133256 | 0.072466  |
| 1  | -2.023035 | -2.102967 | 0.729849  |
| 6  | -2.528797 | -3.155427 | -0.890713 |
| 1  | -3.355430 | -3.115149 | -1.603311 |
| 1  | -2.528727 | -4.142832 | -0.416344 |
| 1  | -1.582505 | -3.018697 | -1.429072 |
| 8  | 2.121556  | 1.988841  | -1.365894 |
| 1  | 1.428173  | 2.411590  | -0.779373 |
| 6  | 2.933347  | 3.004446  | -1.938422 |
| 1  | 3.719034  | 2.519011  | -2.520771 |
| 1  | 3.397492  | 3.621210  | -1.161548 |
| 1  | 2.345456  | 3.645856  | -2.602281 |
| 8  | -0.992727 | -1.445039 | 1.983733  |
| 1  | -0.023750 | -1.293997 | 1.941195  |
| 6  | -1.608428 | -0.203392 | 2.282879  |
| 1  | -2.681646 | -0.382388 | 2.391986  |
| 1  | -1.455752 | 0.528532  | 1.477092  |
| 1  | -1.221612 | 0.214339  | 3.219946  |
| 8  | -2.183118 | 2.509133  | 0.149961  |
| 1  | -2.616553 | 1.675067  | -0.164795 |
| 6  | -2.959949 | 3.079647  | 1.187134  |
| 1  | -2.516934 | 4.044738  | 1.444266  |
| 1  | -2.964842 | 2.443299  | 2.082019  |

|   |           |           |           |
|---|-----------|-----------|-----------|
| 1 | -3.992654 | 3.241798  | 0.862079  |
| 8 | 0.841130  | -3.070591 | -1.765684 |
| 1 | 0.840583  | -2.154481 | -2.088505 |
| 6 | 1.051800  | -3.046054 | -0.370819 |
| 1 | 1.740182  | -3.854102 | -0.100923 |
| 1 | 0.112798  | -3.199342 | 0.182687  |
| 1 | 1.481273  | -2.092018 | -0.039573 |
| 8 | 0.709425  | -0.313597 | -2.030896 |
| 1 | 1.308019  | 0.441253  | -2.155545 |
| 6 | -0.147390 | 0.010187  | -0.948592 |
| 1 | -0.817331 | -0.838118 | -0.781422 |
| 1 | -0.753195 | 0.895406  | -1.171766 |
| 1 | 0.422672  | 0.184267  | -0.024350 |
| 8 | -3.409039 | 0.339813  | -0.732498 |
| 1 | -3.228505 | -0.553280 | -0.354879 |
| 6 | -3.401636 | 0.224822  | -2.146756 |
| 1 | -3.393801 | 1.234136  | -2.565008 |
| 1 | -4.297870 | -0.296262 | -2.500525 |
| 1 | -2.510685 | -0.309076 | -2.500826 |
| 8 | 3.204649  | -0.018330 | 0.143618  |
| 1 | 2.879786  | 0.747908  | -0.374463 |
| 6 | 3.818638  | -0.951041 | -0.735462 |
| 1 | 4.119004  | -1.816736 | -0.140833 |
| 1 | 4.713245  | -0.519097 | -1.197515 |
| 1 | 3.124837  | -1.285810 | -1.514821 |
| 8 | 0.425832  | 3.031245  | 0.301863  |
| 1 | -0.531745 | 2.833986  | 0.160752  |
| 6 | 0.782974  | 2.631479  | 1.618521  |
| 1 | 1.793272  | 2.997380  | 1.814716  |
| 1 | 0.776457  | 1.540812  | 1.735466  |
| 1 | 0.101098  | 3.070996  | 2.354994  |
| 8 | 1.626478  | -0.803620 | 2.181213  |
| 1 | 2.181637  | -0.490341 | 1.431310  |
| 6 | 2.343650  | -1.807728 | 2.880690  |
| 1 | 1.720430  | -2.141807 | 3.712540  |
| 1 | 3.285117  | -1.413836 | 3.278012  |
| 1 | 2.558160  | -2.669667 | 2.235718  |

-----  
Cartesian coordinates of : BC10\_7

-----  
Atomic number (AN) and Cartesian coordinates

| AN | X         | Y         | Z         |
|----|-----------|-----------|-----------|
| 8  | -3.475801 | 0.093560  | 0.016005  |
| 1  | -2.938855 | 0.720298  | 0.540948  |
| 6  | -3.985281 | 0.792899  | -1.110667 |
| 1  | -4.333522 | 0.051141  | -1.832982 |
| 1  | -3.208972 | 1.406595  | -1.584774 |
| 1  | -4.829644 | 1.430923  | -0.826454 |
| 8  | 2.493556  | -1.434046 | 1.653957  |
| 1  | 2.624123  | -0.945367 | 0.808394  |
| 6  | 3.680787  | -1.336472 | 2.421748  |
| 1  | 3.517778  | -1.875794 | 3.356812  |
| 1  | 3.927300  | -0.293252 | 2.653377  |
| 1  | 4.526683  | -1.791167 | 1.895187  |
| 8  | -1.873916 | 2.077072  | 0.967430  |
| 1  | -1.175446 | 1.909561  | 1.675436  |
| 6  | -2.455069 | 3.360463  | 1.162548  |
| 1  | -3.098523 | 3.572803  | 0.305629  |
| 1  | -1.681403 | 4.132990  | 1.223187  |
| 1  | -3.057429 | 3.382114  | 2.075944  |
| 8  | 0.045824  | -2.532372 | -2.115006 |
| 1  | -0.865367 | -2.357901 | -1.822376 |
| 6  | 0.751878  | -3.000509 | -0.986415 |

|   |           |           |           |
|---|-----------|-----------|-----------|
| 1 | 1.664173  | -3.491591 | -1.335228 |
| 1 | 0.167277  | -3.729964 | -0.410425 |
| 1 | 1.040702  | -2.183368 | -0.308655 |
| 8 | -2.357289 | -2.236231 | -0.753620 |
| 1 | -2.773029 | -1.416749 | -0.408633 |
| 6 | -3.068748 | -3.374160 | -0.308691 |
| 1 | -2.601483 | -4.252453 | -0.760112 |
| 1 | -4.119472 | -3.340081 | -0.619016 |
| 1 | -3.024546 | -3.474963 | 0.783154  |
| 8 | 0.098134  | -0.963258 | 2.791117  |
| 1 | 0.992042  | -1.197005 | 2.447567  |
| 6 | -0.851767 | -1.296575 | 1.789746  |
| 1 | -1.850198 | -1.104280 | 2.192691  |
| 1 | -0.782023 | -2.350790 | 1.504992  |
| 1 | -0.717548 | -0.690874 | 0.880817  |
| 8 | -0.550030 | 1.811939  | -1.443015 |
| 1 | -1.013146 | 1.920928  | -0.586624 |
| 6 | -0.422509 | 0.422495  | -1.737102 |
| 1 | -0.062877 | 0.327394  | -2.763452 |
| 1 | -1.385064 | -0.092359 | -1.654791 |
| 1 | 0.301252  | -0.069455 | -1.072598 |
| 8 | 0.092995  | 1.658522  | 2.550734  |
| 1 | 0.068530  | 0.717270  | 2.862173  |
| 6 | 1.167574  | 1.748203  | 1.620523  |
| 1 | 1.170478  | 2.753448  | 1.194773  |
| 1 | 1.046880  | 1.019326  | 0.807007  |
| 1 | 2.129581  | 1.567449  | 2.110985  |
| 8 | 2.989659  | -0.102865 | -0.619889 |
| 1 | 2.673116  | 0.810225  | -0.806459 |
| 6 | 3.096175  | -0.810942 | -1.847566 |
| 1 | 3.574585  | -1.769342 | -1.634039 |
| 1 | 3.723242  | -0.261767 | -2.559198 |
| 1 | 2.112099  | -1.004536 | -2.292337 |
| 8 | 2.069430  | 2.333824  | -1.334135 |
| 1 | 1.084446  | 2.297371  | -1.360758 |
| 6 | 2.555835  | 2.741046  | -2.602329 |
| 1 | 3.646353  | 2.691603  | -2.570142 |
| 1 | 2.258793  | 3.770889  | -2.826723 |
| 1 | 2.195387  | 2.082880  | -3.402697 |

-----  
Cartesian coordinates of : CY10\_1

-----  
Atomic number (AN) and Cartesian coordinates

| AN | X         | Y         | Z         |
|----|-----------|-----------|-----------|
| 8  | -1.139766 | -1.054413 | -2.114289 |
| 1  | -0.503366 | -1.658550 | -1.666427 |
| 6  | -0.479177 | 0.183419  | -2.333695 |
| 1  | -1.189404 | 0.862914  | -2.809949 |
| 1  | 0.385197  | 0.057533  | -2.994957 |
| 1  | -0.141048 | 0.633067  | -1.391720 |
| 8  | 1.248149  | 2.813428  | -1.194580 |
| 1  | 0.523173  | 2.644719  | -0.543484 |
| 6  | 1.506029  | 4.207931  | -1.228171 |
| 1  | 2.350784  | 4.374943  | -1.899302 |
| 1  | 1.761167  | 4.592985  | -0.234402 |
| 1  | 0.638753  | 4.757543  | -1.610702 |
| 8  | 0.771976  | -2.568387 | -1.017496 |
| 1  | 1.321993  | -2.425513 | -0.208749 |
| 6  | 1.578037  | -3.185857 | -2.005606 |
| 1  | 0.983705  | -3.264059 | -2.919099 |
| 1  | 1.882638  | -4.191394 | -1.695699 |
| 1  | 2.477024  | -2.594247 | -2.217640 |
| 8  | -3.481776 | -0.348076 | 1.723900  |

|   |           |           |           |
|---|-----------|-----------|-----------|
| 1 | -3.475622 | -0.605116 | 0.772744  |
| 6 | -4.590277 | 0.503974  | 1.946821  |
| 1 | -4.477485 | 0.953894  | 2.935458  |
| 1 | -5.530701 | -0.058992 | 1.926665  |
| 1 | -4.639034 | 1.303366  | 1.197630  |
| 8 | 3.368183  | 1.244828  | -0.735692 |
| 1 | 2.621123  | 1.864907  | -0.910651 |
| 6 | 3.126404  | 0.049472  | -1.460253 |
| 1 | 3.932203  | -0.651330 | -1.226892 |
| 1 | 3.120900  | 0.235796  | -2.540624 |
| 1 | 2.171245  | -0.412530 | -1.173758 |
| 8 | -0.755323 | 2.481261  | 0.501624  |
| 1 | -0.749378 | 1.788825  | 1.207637  |
| 6 | -2.022397 | 2.431823  | -0.136589 |
| 1 | -1.927226 | 2.904107  | -1.118355 |
| 1 | -2.771874 | 2.980148  | 0.445629  |
| 1 | -2.364651 | 1.398187  | -0.277721 |
| 8 | -3.489837 | -0.779789 | -0.920693 |
| 1 | -2.615803 | -0.897281 | -1.371533 |
| 6 | -4.433091 | -1.667430 | -1.495859 |
| 1 | -5.382882 | -1.530115 | -0.973956 |
| 1 | -4.120431 | -2.712065 | -1.387638 |
| 1 | -4.582125 | -1.446700 | -2.558140 |
| 8 | 3.095537  | 0.236589  | 1.702897  |
| 1 | 3.349346  | 0.703136  | 0.870952  |
| 6 | 2.228570  | 1.081958  | 2.444308  |
| 1 | 1.580086  | 0.462949  | 3.068583  |
| 1 | 1.588995  | 1.677823  | 1.780065  |
| 1 | 2.804308  | 1.759216  | 3.084095  |
| 8 | -0.910391 | 0.355589  | 2.070915  |
| 1 | -1.869337 | 0.153344  | 2.153552  |
| 6 | -0.355440 | -0.642833 | 1.225207  |
| 1 | 0.573857  | -0.254162 | 0.793776  |
| 1 | -1.040891 | -0.896493 | 0.407441  |
| 1 | -0.120130 | -1.553506 | 1.787287  |
| 8 | 2.467638  | -2.248986 | 0.999050  |
| 1 | 2.702640  | -1.327392 | 1.273583  |
| 6 | 2.445863  | -3.084365 | 2.141890  |
| 1 | 2.131939  | -4.080722 | 1.822804  |
| 1 | 1.737454  | -2.718650 | 2.895789  |
| 1 | 3.440603  | -3.155500 | 2.594293  |

-----  
Cartesian coordinates of : BC10\_13

-----  
Atomic number (AN) and Cartesian coordinates

| AN | X         | Y         | Z         |
|----|-----------|-----------|-----------|
| 8  | 3.165609  | 0.092026  | -0.163976 |
| 1  | 2.846360  | -0.209220 | 0.711271  |
| 6  | 3.272114  | 1.509832  | -0.171002 |
| 1  | 3.544227  | 1.812670  | -1.184858 |
| 1  | 4.058765  | 1.844466  | 0.514196  |
| 1  | 2.325309  | 1.994766  | 0.090582  |
| 8  | 0.128743  | 3.338288  | 0.041915  |
| 1  | 0.226015  | 2.677352  | 0.754588  |
| 6  | -0.299374 | 4.556908  | 0.610535  |
| 1  | -0.415831 | 5.278646  | -0.201091 |
| 1  | 0.430575  | 4.955700  | 1.326478  |
| 1  | -1.266435 | 4.452880  | 1.122011  |
| 8  | -2.249118 | -1.125841 | -1.321091 |
| 1  | -1.412951 | -0.836475 | -1.790106 |
| 6  | -3.220959 | -1.512285 | -2.285614 |
| 1  | -4.154397 | -1.713647 | -1.755725 |
| 1  | -2.908388 | -2.415923 | -2.818733 |

|   |           |           |           |
|---|-----------|-----------|-----------|
| 1 | -3.391752 | -0.707217 | -3.007806 |
| 8 | -2.050317 | -2.470696 | 1.043344  |
| 1 | -2.110812 | -2.081870 | 0.145883  |
| 6 | -3.142433 | -1.993249 | 1.818758  |
| 1 | -2.923814 | -2.206699 | 2.867487  |
| 1 | -4.068044 | -2.511853 | 1.544563  |
| 1 | -3.287843 | -0.914431 | 1.689954  |
| 8 | 2.084049  | -0.650215 | 2.249736  |
| 1 | 1.473366  | -1.420888 | 2.045131  |
| 6 | 2.891267  | -0.948690 | 3.380890  |
| 1 | 3.594606  | -0.125236 | 3.517752  |
| 1 | 3.453528  | -1.874757 | 3.225574  |
| 1 | 2.279238  | -1.044542 | 4.283352  |
| 8 | 2.322620  | -1.131151 | -2.398042 |
| 1 | 2.638864  | -0.722073 | -1.558869 |
| 6 | 3.191291  | -0.743560 | -3.449375 |
| 1 | 2.903720  | -1.301392 | -4.342281 |
| 1 | 4.232015  | -0.981590 | -3.205781 |
| 1 | 3.110137  | 0.329533  | -3.664887 |
| 8 | 0.596994  | -2.569892 | 1.403674  |
| 1 | -0.382216 | -2.548226 | 1.504849  |
| 6 | 0.862685  | -2.438926 | 0.010788  |
| 1 | 1.928412  | -2.611395 | -0.150861 |
| 1 | 0.609661  | -1.431065 | -0.346782 |
| 1 | 0.293826  | -3.174444 | -0.566270 |
| 8 | -3.609733 | 0.897289  | 0.094367  |
| 1 | -3.059797 | 0.261406  | -0.395501 |
| 6 | -3.301934 | 2.203120  | -0.352186 |
| 1 | -3.969310 | 2.893005  | 0.169456  |
| 1 | -3.469401 | 2.316332  | -1.432111 |
| 1 | -2.262063 | 2.484789  | -0.131335 |
| 8 | -0.163185 | -0.151097 | -2.495665 |
| 1 | 0.684772  | -0.646601 | -2.573216 |
| 6 | 0.114893  | 1.048948  | -1.778675 |
| 1 | -0.813824 | 1.609975  | -1.671902 |
| 1 | 0.836716  | 1.674116  | -2.314346 |
| 1 | 0.510676  | 0.835964  | -0.775905 |
| 8 | 0.245647  | 1.376206  | 1.955223  |
| 1 | 1.011519  | 0.797723  | 2.127837  |
| 6 | -0.902480 | 0.551834  | 1.819759  |
| 1 | -1.787860 | 1.189957  | 1.838061  |
| 1 | -0.969020 | -0.171535 | 2.641637  |
| 1 | -0.899441 | -0.001119 | 0.868550  |

-----  
Cartesian coordinates of : BDC10

-----  
Atomic number (AN) and Cartesian coordinates

| AN | X         | Y         | Z         |
|----|-----------|-----------|-----------|
| 8  | 1.194994  | -1.676357 | 1.296838  |
| 1  | 1.903220  | -1.433355 | 0.643844  |
| 6  | 1.759213  | -2.520149 | 2.285257  |
| 1  | 0.952590  | -2.846168 | 2.946890  |
| 1  | 2.510912  | -1.990665 | 2.882142  |
| 1  | 2.225037  | -3.403601 | 1.832731  |
| 8  | 3.257184  | 1.289944  | -1.157609 |
| 1  | 2.602034  | 1.667734  | -0.531101 |
| 6  | 3.540033  | 2.187993  | -2.210913 |
| 1  | 4.267578  | 1.709060  | -2.868892 |
| 1  | 3.972587  | 3.121139  | -1.833226 |
| 1  | 2.640764  | 2.423332  | -2.794070 |
| 8  | -0.659375 | 0.116520  | 2.305156  |
| 1  | 0.044828  | -0.477644 | 1.985066  |
| 6  | -1.898626 | -0.416432 | 1.884271  |

|   |           |           |           |
|---|-----------|-----------|-----------|
| 1 | -2.641110 | 0.387585  | 1.896429  |
| 1 | -2.242397 | -1.218225 | 2.553751  |
| 1 | -1.834205 | -0.800316 | 0.858513  |
| 8 | -2.692259 | -1.064960 | -1.534147 |
| 1 | -1.938619 | -1.653031 | -1.309322 |
| 6 | -3.874495 | -1.682119 | -1.057669 |
| 1 | -4.702488 | -0.988155 | -1.219457 |
| 1 | -3.808970 | -1.901220 | 0.016487  |
| 1 | -4.082947 | -2.611222 | -1.599932 |
| 8 | 1.474228  | 1.786492  | 0.759405  |
| 1 | 0.604926  | 2.283500  | 0.805102  |
| 6 | 2.050105  | 1.643816  | 2.051031  |
| 1 | 2.853289  | 0.905362  | 1.976362  |
| 1 | 1.302863  | 1.293119  | 2.768998  |
| 1 | 2.476095  | 2.593401  | 2.394325  |
| 8 | 3.051803  | -1.337559 | -0.534905 |
| 1 | 3.225837  | -0.420497 | -0.835064 |
| 6 | 2.544942  | -2.096450 | -1.624597 |
| 1 | 2.285505  | -3.087169 | -1.242973 |
| 1 | 3.302174  | -2.207992 | -2.407817 |
| 1 | 1.639454  | -1.641701 | -2.040573 |
| 8 | -0.724775 | -2.741861 | -0.652141 |
| 1 | -0.123097 | -2.045736 | -0.330080 |
| 6 | -0.897835 | -3.707836 | 0.365435  |
| 1 | -1.640667 | -4.427459 | 0.014391  |
| 1 | -1.253347 | -3.252494 | 1.298417  |
| 1 | 0.039354  | -4.239403 | 0.569260  |
| 8 | -2.679032 | 1.452210  | -0.568668 |
| 1 | -2.524825 | 0.516254  | -0.833307 |
| 6 | -3.214608 | 2.149017  | -1.678431 |
| 1 | -3.368245 | 3.187141  | -1.375487 |
| 1 | -4.176902 | 1.723230  | -1.984684 |
| 1 | -2.531321 | 2.129804  | -2.536350 |
| 8 | 0.067266  | -0.102583 | -0.720645 |
| 1 | 0.571119  | 0.384604  | -0.041910 |
| 6 | 0.075458  | 0.660731  | -1.912962 |
| 1 | -0.711165 | 0.266122  | -2.562683 |
| 1 | 1.042650  | 0.588136  | -2.427979 |
| 1 | -0.138257 | 1.718666  | -1.708441 |
| 8 | -0.862783 | 2.913112  | 0.715444  |
| 1 | -1.460938 | 2.275387  | 0.253815  |
| 6 | -1.421374 | 3.201664  | 1.991326  |
| 1 | -0.887563 | 4.063313  | 2.399158  |
| 1 | -1.309501 | 2.346317  | 2.666176  |
| 1 | -2.481130 | 3.461776  | 1.895191  |

-----

Cartesian coordinates of : BC10\_3

-----

Atomic number (AN) and Cartesian coordinates

| AN | X         | Y         | Z         |
|----|-----------|-----------|-----------|
| 8  | 0.677901  | -1.152561 | 2.377894  |
| 1  | 1.260680  | -1.488937 | 1.655254  |
| 6  | 1.427786  | -0.980546 | 3.564416  |
| 1  | 0.729201  | -0.754021 | 4.373013  |
| 1  | 2.134661  | -0.145311 | 3.471226  |
| 1  | 1.984381  | -1.887533 | 3.824422  |
| 8  | -2.647525 | -1.665970 | -2.372841 |
| 1  | -1.684502 | -1.695938 | -2.246243 |
| 6  | -2.917401 | -0.608016 | -3.267215 |
| 1  | -4.002993 | -0.518804 | -3.356179 |
| 1  | -2.502260 | -0.796729 | -4.265116 |
| 1  | -2.518797 | 0.349449  | -2.900547 |
| 8  | 2.666668  | -0.462518 | -1.670319 |



|   |           |           |           |
|---|-----------|-----------|-----------|
| 1 | 2.667587  | 0.444248  | -1.231574 |
| 6 | 3.836538  | -0.615350 | -2.460875 |
| 1 | 3.853551  | -1.637400 | -2.844833 |
| 1 | 4.738366  | -0.445164 | -1.863361 |
| 1 | 3.830266  | 0.079602  | -3.306472 |
| 8 | 0.696970  | 3.403361  | -0.371632 |
| 1 | -0.035089 | 3.033147  | 0.184732  |
| 6 | 0.142320  | 4.080835  | -1.483933 |
| 1 | 0.964247  | 4.510305  | -2.060055 |
| 1 | -0.518556 | 4.890537  | -1.157532 |
| 1 | -0.423350 | 3.398472  | -2.131486 |
| 8 | -3.170222 | 0.660207  | 1.035706  |
| 1 | -2.771881 | -0.175014 | 1.377200  |
| 6 | -4.140566 | 0.344086  | 0.048546  |
| 1 | -4.411812 | 1.271500  | -0.461887 |
| 1 | -5.041901 | -0.074195 | 0.510742  |
| 1 | -3.748687 | -0.369741 | -0.686888 |
| 8 | -1.186212 | 2.413437  | 1.170999  |
| 1 | -1.963342 | 1.844679  | 0.956303  |
| 6 | -0.761341 | 2.076735  | 2.482791  |
| 1 | 0.089347  | 2.717583  | 2.730664  |
| 1 | -0.444752 | 1.026972  | 2.539075  |
| 1 | -1.561730 | 2.256508  | 3.208190  |
| 8 | 2.212872  | -2.123829 | 0.436643  |
| 1 | 2.441974  | -1.531036 | -0.311424 |
| 6 | 1.759872  | -3.366635 | -0.083779 |
| 1 | 1.308721  | -3.925007 | 0.739695  |
| 1 | 2.596816  | -3.948383 | -0.485453 |
| 1 | 1.005350  | -3.215663 | -0.863554 |
| 8 | -0.049438 | -0.958575 | -1.764377 |
| 1 | 0.891053  | -0.889300 | -2.001916 |
| 6 | -0.344258 | 0.074296  | -0.833056 |
| 1 | -1.425467 | 0.070462  | -0.667923 |
| 1 | -0.043343 | 1.057662  | -1.213637 |
| 1 | 0.144787  | -0.099863 | 0.135865  |
| 8 | -1.950869 | -1.600876 | 1.801685  |
| 1 | -1.062271 | -1.429899 | 2.171915  |
| 6 | -1.803369 | -2.557097 | 0.758926  |
| 1 | -2.709734 | -2.543315 | 0.149537  |
| 1 | -1.663955 | -3.562696 | 1.172672  |
| 1 | -0.954282 | -2.310833 | 0.109607  |
| 8 | 2.708615  | 1.717380  | -0.332204 |
| 1 | 1.996986  | 2.395781  | -0.467861 |
| 6 | 2.665076  | 1.323817  | 1.032981  |
| 1 | 3.314012  | 0.450776  | 1.153273  |
| 1 | 1.647741  | 1.044996  | 1.336212  |
| 1 | 3.030963  | 2.128899  | 1.679095  |

-----  
Cartesian coordinates of : BC10\_4

-----  
Atomic number (AN) and Cartesian coordinates

| AN | X         | Y         | Z         |
|----|-----------|-----------|-----------|
| 8  | 2.844504  | -1.997771 | -0.849724 |
| 1  | 1.879028  | -2.041044 | -1.066524 |
| 6  | 3.581029  | -2.302928 | -2.023233 |
| 1  | 4.634695  | -2.102356 | -1.818425 |
| 1  | 3.259142  | -1.684202 | -2.868759 |
| 1  | 3.467683  | -3.358528 | -2.290610 |
| 8  | -2.773260 | 1.436442  | -0.785825 |
| 1  | -1.923549 | 1.833789  | -1.057365 |
| 6  | -3.386871 | 0.810561  | -1.898381 |
| 1  | -4.386387 | 0.500812  | -1.588301 |
| 1  | -2.835024 | -0.082981 | -2.219130 |

|   |           |           |           |
|---|-----------|-----------|-----------|
| 1 | -3.478224 | 1.499693  | -2.746232 |
| 8 | 0.526398  | -0.791116 | 2.814519  |
| 1 | -0.010392 | 0.011673  | 2.716555  |
| 6 | 0.583238  | -1.390909 | 1.535391  |
| 1 | 1.137794  | -2.328523 | 1.626301  |
| 1 | 1.108438  | -0.753831 | 0.809545  |
| 1 | -0.417555 | -1.601557 | 1.132056  |
| 8 | -1.946012 | -2.748369 | -0.733849 |
| 1 | -2.372107 | -2.009994 | -0.234162 |
| 6 | -1.976589 | -3.909644 | 0.077073  |
| 1 | -1.484278 | -4.715115 | -0.471516 |
| 1 | -3.008148 | -4.211893 | 0.289281  |
| 1 | -1.446166 | -3.754590 | 1.025600  |
| 8 | -0.374017 | 2.629156  | -1.509159 |
| 1 | 0.416006  | 2.413938  | -0.972498 |
| 6 | 0.006227  | 2.981018  | -2.826715 |
| 1 | -0.906873 | 3.181701  | -3.390628 |
| 1 | 0.552245  | 2.167888  | -3.320574 |
| 1 | 0.626320  | 3.884258  | -2.834751 |
| 8 | 3.436282  | 0.263766  | 0.335181  |
| 1 | 3.221228  | -0.584187 | -0.140515 |
| 6 | 3.752993  | -0.046335 | 1.691422  |
| 1 | 4.317179  | 0.794388  | 2.102634  |
| 1 | 4.377325  | -0.943454 | 1.738885  |
| 1 | 2.847469  | -0.206294 | 2.288968  |
| 8 | 0.351240  | -1.776963 | -1.652641 |
| 1 | -0.459849 | -2.258161 | -1.357389 |
| 6 | 0.055670  | -0.391144 | -1.662951 |
| 1 | 1.001237  | 0.159481  | -1.589587 |
| 1 | -0.578006 | -0.105582 | -0.812366 |
| 1 | -0.443993 | -0.097336 | -2.594416 |
| 8 | 1.535753  | 1.985672  | 0.301434  |
| 1 | 2.259375  | 1.282586  | 0.254792  |
| 6 | 1.984058  | 3.035429  | 1.149496  |
| 1 | 1.325635  | 3.895639  | 1.002888  |
| 1 | 3.009225  | 3.325927  | 0.898323  |
| 1 | 1.942244  | 2.730267  | 2.202159  |
| 8 | -2.984453 | -0.785942 | 0.743202  |
| 1 | -2.685946 | 0.106913  | 0.468920  |
| 6 | -2.987168 | -0.915143 | 2.154747  |
| 1 | -3.478862 | -1.861055 | 2.394638  |
| 1 | -3.556857 | -0.103043 | 2.619960  |
| 1 | -1.973051 | -0.923745 | 2.566570  |
| 8 | -0.851743 | 1.251867  | 1.493233  |
| 1 | -0.012031 | 1.404933  | 1.015783  |
| 6 | -1.464696 | 2.511369  | 1.732818  |
| 1 | -2.506308 | 2.327203  | 2.003821  |
| 1 | -1.453158 | 3.134905  | 0.831913  |
| 1 | -0.970379 | 3.043910  | 2.555175  |

-----  
 Cartesian coordinates of : BC10\_10

-----  
 Atomic number (AN) and Cartesian coordinates

| AN | X         | Y         | Z         |
|----|-----------|-----------|-----------|
| 8  | -3.948147 | -0.889976 | 0.135008  |
| 1  | -3.224707 | -1.455754 | -0.218815 |
| 6  | -5.171107 | -1.261923 | -0.474105 |
| 1  | -5.946866 | -0.593466 | -0.094880 |
| 1  | -5.443355 | -2.293073 | -0.222348 |
| 1  | -5.125899 | -1.163285 | -1.565905 |
| 8  | 2.567761  | 0.004371  | -2.074685 |
| 1  | 2.550146  | 0.854660  | -1.539521 |
| 6  | 3.681311  | 0.032403  | -2.956040 |

|   |           |           |           |
|---|-----------|-----------|-----------|
| 1 | 3.731671  | -0.930919 | -3.467649 |
| 1 | 4.615290  | 0.190714  | -2.405424 |
| 1 | 3.568161  | 0.824414  | -3.702654 |
| 8 | -0.312863 | 1.014960  | 2.312352  |
| 1 | 0.253361  | 0.215580  | 2.323634  |
| 6 | -1.682531 | 0.644596  | 2.382126  |
| 1 | -2.279677 | 1.523478  | 2.130353  |
| 1 | -1.944792 | 0.306636  | 3.390807  |
| 1 | -1.929366 | -0.148292 | 1.666195  |
| 8 | 0.554281  | 2.997357  | 0.695276  |
| 1 | 0.238548  | 2.316844  | 1.331861  |
| 6 | -0.566168 | 3.712976  | 0.187903  |
| 1 | -0.262135 | 4.192317  | -0.746628 |
| 1 | -0.873759 | 4.493599  | 0.892667  |
| 1 | -1.413491 | 3.044924  | -0.004241 |
| 8 | -1.879663 | -2.392878 | -0.678447 |
| 1 | -1.270222 | -1.942145 | -1.295037 |
| 6 | -1.155321 | -2.727107 | 0.497664  |
| 1 | -1.859244 | -2.754641 | 1.333822  |
| 1 | -0.381875 | -1.982436 | 0.719095  |
| 1 | -0.686569 | -3.712662 | 0.400204  |
| 8 | -0.109946 | -0.698630 | -1.825163 |
| 1 | 0.754740  | -0.647175 | -2.263829 |
| 6 | -0.138505 | 0.336103  | -0.848118 |
| 1 | -1.106494 | 0.300644  | -0.342126 |
| 1 | -0.035098 | 1.323511  | -1.312483 |
| 1 | 0.656779  | 0.202879  | -0.103422 |
| 8 | -3.176409 | 1.679520  | -0.449717 |
| 1 | -3.518115 | 0.838110  | -0.089519 |
| 6 | -3.124544 | 1.541092  | -1.853386 |
| 1 | -2.574246 | 2.397461  | -2.254809 |
| 1 | -4.127050 | 1.537553  | -2.301835 |
| 1 | -2.598921 | 0.624598  | -2.158589 |
| 8 | 2.527854  | -1.839624 | -0.066375 |
| 1 | 2.599612  | -1.169019 | -0.779906 |
| 6 | 2.153519  | -3.080434 | -0.645013 |
| 1 | 1.979554  | -3.786167 | 0.170235  |
| 1 | 2.953796  | -3.472689 | -1.282423 |
| 1 | 1.232052  | -2.983665 | -1.231292 |
| 8 | 2.703676  | 2.021746  | -0.475012 |
| 1 | 1.878087  | 2.495850  | -0.200597 |
| 6 | 3.243667  | 1.451361  | 0.709954  |
| 1 | 4.000770  | 0.716274  | 0.420524  |
| 1 | 2.464902  | 0.940979  | 1.292083  |
| 1 | 3.711290  | 2.220268  | 1.332626  |
| 8 | 1.355786  | -1.149296 | 2.255263  |
| 1 | 1.754454  | -1.394848 | 1.389372  |
| 6 | 2.354665  | -1.218279 | 3.258485  |
| 1 | 1.908878  | -0.877191 | 4.194747  |
| 1 | 3.209823  | -0.573400 | 3.020944  |
| 1 | 2.711404  | -2.245599 | 3.389927  |

-----

Cartesian coordinates of : CY10\_2

-----

Atomic number (AN) and Cartesian coordinates

| AN | X         | Y         | Z         |
|----|-----------|-----------|-----------|
| 8  | 4.363034  | 0.162417  | -0.474357 |
| 1  | 3.827352  | 0.242072  | 0.345015  |
| 6  | 4.296129  | -1.188582 | -0.899034 |
| 1  | 5.028194  | -1.323615 | -1.697475 |
| 1  | 3.299566  | -1.442253 | -1.286656 |
| 1  | 4.538622  | -1.874881 | -0.079251 |
| 8  | -3.260016 | 1.958384  | 0.051565  |

-----

|   |           |           |           |
|---|-----------|-----------|-----------|
| 1 | -3.301143 | 0.995200  | -0.162414 |
| 6 | -3.911547 | 2.157989  | 1.296335  |
| 1 | -4.026760 | 3.233931  | 1.444630  |
| 1 | -3.325401 | 1.747474  | 2.128525  |
| 1 | -4.902161 | 1.692977  | 1.296426  |
| 8 | 0.470527  | -2.803027 | -0.576910 |
| 1 | 0.681186  | -2.020215 | -1.138246 |
| 6 | 1.418325  | -2.881214 | 0.479384  |
| 1 | 0.925088  | -3.329074 | 1.348183  |
| 1 | 1.791713  | -1.887240 | 0.753533  |
| 1 | 2.262781  | -3.517185 | 0.190533  |
| 8 | -3.550750 | -0.649564 | -0.327381 |
| 1 | -2.915448 | -1.328015 | 0.013824  |
| 6 | -4.172730 | -1.156176 | -1.493883 |
| 1 | -4.726032 | -0.339690 | -1.963026 |
| 1 | -4.875872 | -1.960875 | -1.248969 |
| 1 | -3.434091 | -1.536232 | -2.210533 |
| 8 | 2.612845  | 1.416788  | -2.089003 |
| 1 | 3.393535  | 1.044402  | -1.619483 |
| 6 | 2.080421  | 2.446595  | -1.268135 |
| 1 | 1.205720  | 2.860846  | -1.774387 |
| 1 | 2.815589  | 3.244106  | -1.113312 |
| 1 | 1.754390  | 2.056909  | -0.294347 |
| 8 | 0.763561  | -0.499332 | -1.854412 |
| 1 | 1.491333  | 0.147988  | -2.018884 |
| 6 | -0.486669 | 0.129346  | -2.091272 |
| 1 | -1.273594 | -0.552211 | -1.752232 |
| 1 | -0.630868 | 0.331231  | -3.158750 |
| 1 | -0.575552 | 1.064568  | -1.524787 |
| 8 | -1.939031 | -2.603141 | 0.413819  |
| 1 | -1.032318 | -2.666721 | 0.007410  |
| 6 | -2.567948 | -3.871285 | 0.361131  |
| 1 | -3.580621 | -3.759554 | 0.756340  |
| 1 | -2.032499 | -4.601820 | 0.977701  |
| 1 | -2.627234 | -4.249485 | -0.666222 |
| 8 | -0.765069 | 2.792275  | 0.199743  |
| 1 | -1.714324 | 2.525981  | 0.091189  |
| 6 | -0.638356 | 4.200445  | 0.171264  |
| 1 | 0.423480  | 4.442487  | 0.265886  |
| 1 | -1.177467 | 4.673865  | 1.000664  |
| 1 | -1.006990 | 4.611549  | -0.775352 |
| 8 | 0.250445  | 0.974869  | 1.896316  |
| 1 | -0.022152 | 1.752599  | 1.360090  |
| 6 | -0.541167 | -0.127130 | 1.468043  |
| 1 | -0.358656 | -0.962832 | 2.147674  |
| 1 | -0.273885 | -0.433787 | 0.449542  |
| 1 | -1.609851 | 0.116200  | 1.502824  |
| 8 | 2.737101  | 0.112852  | 1.670289  |
| 1 | 1.836823  | 0.522705  | 1.723260  |
| 6 | 3.059047  | -0.466834 | 2.919395  |
| 1 | 4.079268  | -0.853125 | 2.857801  |
| 1 | 2.383120  | -1.298433 | 3.159200  |
| 1 | 3.010949  | 0.271058  | 3.727377  |

-----  
Cartesian coordinates of : BC10\_2

-----  
Atomic number (AN) and Cartesian coordinates

| AN | X         | Y         | Z        |
|----|-----------|-----------|----------|
| 8  | -0.223414 | 1.449701  | 1.009875 |
| 1  | 0.146520  | 1.770336  | 0.162967 |
| 6  | 0.318703  | 0.153397  | 1.239422 |
| 1  | -0.105065 | -0.219505 | 2.176581 |
| 1  | 1.411554  | 0.187778  | 1.335649 |

|   |           |           |           |
|---|-----------|-----------|-----------|
| 1 | 0.040179  | -0.537435 | 0.435932  |
| 8 | 1.924345  | -2.372886 | -0.139626 |
| 1 | 1.252542  | -2.199294 | -0.845515 |
| 6 | 1.255983  | -2.972819 | 0.963581  |
| 1 | 1.660575  | -2.552221 | 1.890865  |
| 1 | 1.425949  | -4.055217 | 0.967059  |
| 1 | 0.177992  | -2.774086 | 0.920997  |
| 8 | 3.229696  | 2.090576  | 0.163472  |
| 1 | 3.385884  | 1.116446  | 0.239641  |
| 6 | 3.065670  | 2.626006  | 1.469350  |
| 1 | 3.198403  | 3.708066  | 1.406286  |
| 1 | 3.819014  | 2.218919  | 2.151514  |
| 1 | 2.065609  | 2.412664  | 1.867656  |
| 8 | 1.076031  | 2.148183  | -1.332165 |
| 1 | 1.923059  | 2.307141  | -0.837919 |
| 6 | 1.250702  | 0.951249  | -2.087948 |
| 1 | 0.284687  | 0.671479  | -2.514360 |
| 1 | 1.601512  | 0.129686  | -1.450596 |
| 1 | 1.967352  | 1.106398  | -2.900368 |
| 8 | -2.827696 | 0.686052  | 1.252420  |
| 1 | -1.961432 | 1.066251  | 0.998465  |
| 6 | -3.102282 | 1.098047  | 2.576735  |
| 1 | -4.018417 | 0.598078  | 2.898981  |
| 1 | -3.257119 | 2.182851  | 2.637120  |
| 1 | -2.291683 | 0.823167  | 3.264595  |
| 8 | -1.908049 | -0.105558 | -1.305938 |
| 1 | -1.785242 | 0.866386  | -1.388933 |
| 6 | -3.247224 | -0.423281 | -1.667562 |
| 1 | -3.349392 | -1.509771 | -1.619439 |
| 1 | -3.472597 | -0.081029 | -2.683334 |
| 1 | -3.947786 | 0.026573  | -0.955792 |
| 8 | -0.067393 | -2.029567 | -1.832394 |
| 1 | -0.705108 | -1.308166 | -1.635949 |
| 6 | -0.778796 | -3.257042 | -1.938992 |
| 1 | -0.039948 | -4.061894 | -1.973107 |
| 1 | -1.364391 | -3.285067 | -2.865091 |
| 1 | -1.437217 | -3.399208 | -1.075941 |
| 8 | 3.645473  | -0.503391 | 0.505870  |
| 1 | 2.971371  | -1.184092 | 0.242245  |
| 6 | 4.941095  | -0.999351 | 0.216265  |
| 1 | 5.661263  | -0.213606 | 0.455378  |
| 1 | 5.042663  | -1.260641 | -0.842879 |
| 1 | 5.167119  | -1.881805 | 0.824609  |
| 8 | -2.126448 | -2.069466 | 0.771341  |
| 1 | -2.283121 | -1.118972 | 0.631000  |
| 6 | -2.478971 | -2.362326 | 2.104868  |
| 1 | -2.349437 | -3.437089 | 2.255746  |
| 1 | -3.523896 | -2.103452 | 2.317383  |
| 1 | -1.837279 | -1.832410 | 2.824097  |
| 8 | -1.627992 | 2.572205  | -1.594913 |
| 1 | -0.676654 | 2.773140  | -1.634390 |
| 6 | -2.262367 | 3.402655  | -0.630252 |
| 1 | -3.263347 | 2.999592  | -0.465563 |
| 1 | -2.343029 | 4.431462  | -0.995841 |
| 1 | -1.722591 | 3.392534  | 0.323901  |

-----  
Cartesian coordinates of : BC10\_9

-----  
Atomic number (AN) and Cartesian coordinates

| AN | X        | Y         | Z         |
|----|----------|-----------|-----------|
| 8  | 0.249050 | -0.934753 | -1.950116 |
| 1  | 1.188374 | -1.170302 | -1.932549 |
| 6  | 0.059020 | 0.164288  | -1.077778 |

|   |           |           |           |
|---|-----------|-----------|-----------|
| 1 | -0.156276 | 1.080690  | -1.642370 |
| 1 | 0.936402  | 0.350219  | -0.446677 |
| 1 | -0.792997 | -0.033693 | -0.417079 |
| 8 | -0.077112 | 2.569794  | 0.654991  |
| 1 | -0.976703 | 2.348350  | 0.311169  |
| 6 | -0.162496 | 2.993792  | 2.007370  |
| 1 | 0.759097  | 3.531845  | 2.246204  |
| 1 | -0.255178 | 2.130475  | 2.675653  |
| 1 | -1.010058 | 3.672313  | 2.151638  |
| 8 | 0.659810  | -2.218490 | 0.679604  |
| 1 | 1.449433  | -2.045461 | 0.118443  |
| 6 | 0.933723  | -3.253307 | 1.613632  |
| 1 | 0.036600  | -3.389841 | 2.220068  |
| 1 | 1.763841  | -2.979844 | 2.274773  |
| 1 | 1.167487  | -4.194538 | 1.104361  |
| 8 | -3.456435 | -0.334366 | -0.536817 |
| 1 | -2.807004 | -1.079190 | -0.505258 |
| 6 | -4.544685 | -0.641958 | 0.316316  |
| 1 | -5.319169 | 0.110768  | 0.155110  |
| 1 | -4.248993 | -0.621481 | 1.372936  |
| 1 | -4.957967 | -1.629211 | 0.083512  |
| 8 | 2.255850  | 2.814049  | -0.581530 |
| 1 | 1.357936  | 2.757125  | -0.172496 |
| 6 | 2.132794  | 2.866043  | -1.992223 |
| 1 | 3.044283  | 3.312404  | -2.395337 |
| 1 | 1.279319  | 3.485550  | -2.288745 |
| 1 | 2.007119  | 1.863692  | -2.423077 |
| 8 | -2.506786 | 2.133586  | -0.317257 |
| 1 | -2.854818 | 1.208867  | -0.364831 |
| 6 | -2.650183 | 2.736077  | -1.592242 |
| 1 | -2.068672 | 3.661551  | -1.592043 |
| 1 | -3.698602 | 2.979807  | -1.796155 |
| 1 | -2.276305 | 2.081416  | -2.388386 |
| 8 | -1.874060 | -2.475742 | -0.454999 |
| 1 | -0.927886 | -2.332703 | -0.252339 |
| 6 | -1.988082 | -3.140245 | -1.707860 |
| 1 | -3.052340 | -3.202320 | -1.946175 |
| 1 | -1.584833 | -4.157190 | -1.644721 |
| 1 | -1.466283 | -2.581822 | -2.489509 |
| 8 | 3.403619  | 0.655063  | 0.413052  |
| 1 | 3.112283  | 1.500030  | -0.016318 |
| 6 | 2.774054  | 0.591695  | 1.690405  |
| 1 | 2.730601  | -0.457984 | 1.998110  |
| 1 | 1.750552  | 0.982289  | 1.652288  |
| 1 | 3.353057  | 1.150891  | 2.431988  |
| 8 | -0.229781 | -0.301947 | 2.522800  |
| 1 | 0.188795  | -0.771613 | 1.782409  |
| 6 | -1.623518 | -0.300692 | 2.290957  |
| 1 | -2.127403 | -0.177058 | 3.253669  |
| 1 | -1.960810 | -1.243295 | 1.837167  |
| 1 | -1.925739 | 0.527468  | 1.632287  |
| 8 | 2.779387  | -1.491252 | -0.845190 |
| 1 | 3.071839  | -0.630088 | -0.413076 |
| 6 | 3.909408  | -2.309424 | -1.102424 |
| 1 | 3.556560  | -3.246281 | -1.538858 |
| 1 | 4.455793  | -2.531231 | -0.178744 |
| 1 | 4.590127  | -1.825751 | -1.810268 |

-----  
 Cartesian coordinates of : BC10\_11

-----  
 Atomic number (AN) and Cartesian coordinates

| AN | X         | Y        | Z        |
|----|-----------|----------|----------|
| 8  | -0.082042 | 3.723406 | 0.141972 |

-----

|   |           |           |           |
|---|-----------|-----------|-----------|
| 1 | -0.032547 | 2.970696  | 0.766724  |
| 6 | -0.985520 | 4.672613  | 0.664308  |
| 1 | -1.022161 | 5.515516  | -0.029862 |
| 1 | -0.667479 | 5.045677  | 1.645958  |
| 1 | -2.000834 | 4.261696  | 0.763357  |
| 8 | -2.187328 | -2.561592 | 1.004008  |
| 1 | -2.678383 | -1.817347 | 0.563909  |
| 6 | -2.682359 | -2.753672 | 2.315605  |
| 1 | -2.117929 | -3.570635 | 2.771003  |
| 1 | -3.742210 | -3.031186 | 2.299403  |
| 1 | -2.561617 | -1.854110 | 2.931980  |
| 8 | 0.320419  | 0.356960  | -2.283981 |
| 1 | 0.674676  | -0.550263 | -2.229987 |
| 6 | 1.164275  | 1.185906  | -1.494386 |
| 1 | 0.699983  | 2.170689  | -1.407929 |
| 1 | 2.149341  | 1.295909  | -1.965450 |
| 1 | 1.297999  | 0.772700  | -0.485532 |
| 8 | -3.553720 | -0.621627 | -0.119624 |
| 1 | -3.042815 | -0.088125 | -0.786625 |
| 6 | -4.734690 | -1.098997 | -0.743227 |
| 1 | -5.266750 | -1.724094 | -0.022344 |
| 1 | -4.505608 | -1.698794 | -1.631009 |
| 1 | -5.386189 | -0.267436 | -1.032751 |
| 8 | 2.443196  | 0.809967  | 1.848878  |
| 1 | 2.848690  | 0.153023  | 1.245172  |
| 6 | 2.966019  | 2.089243  | 1.523036  |
| 1 | 2.486058  | 2.819788  | 2.177322  |
| 1 | 2.745987  | 2.365895  | 0.483506  |
| 1 | 4.048850  | 2.126797  | 1.687311  |
| 8 | -0.162084 | 1.542554  | 1.774986  |
| 1 | 0.705871  | 1.095337  | 1.863367  |
| 6 | -1.125920 | 0.675196  | 1.203733  |
| 1 | -1.982436 | 1.281213  | 0.897239  |
| 1 | -1.477293 | -0.068669 | 1.928690  |
| 1 | -0.739384 | 0.151623  | 0.317097  |
| 8 | -2.323462 | 0.777384  | -1.953201 |
| 1 | -1.379133 | 0.564754  | -2.128698 |
| 6 | -2.466829 | 2.189697  | -1.862388 |
| 1 | -3.433120 | 2.394306  | -1.392609 |
| 1 | -2.459940 | 2.642291  | -2.859832 |
| 1 | -1.671395 | 2.638578  | -1.255578 |
| 8 | 0.397961  | -2.666154 | 0.615153  |
| 1 | -0.590142 | -2.640522 | 0.727434  |
| 6 | 1.029961  | -2.219098 | 1.805576  |
| 1 | 2.101520  | -2.133539 | 1.607290  |
| 1 | 0.878939  | -2.937882 | 2.618167  |
| 1 | 0.654206  | -1.238419 | 2.119585  |
| 8 | 1.611940  | -1.932716 | -1.506030 |
| 1 | 1.069929  | -2.217105 | -0.703656 |
| 6 | 2.055333  | -3.096506 | -2.192410 |
| 1 | 2.611124  | -2.775993 | -3.075917 |
| 1 | 1.206750  | -3.709763 | -2.510637 |
| 1 | 2.711950  | -3.698242 | -1.554230 |
| 8 | 3.598969  | -0.817980 | -0.018284 |
| 1 | 2.928372  | -1.163100 | -0.647343 |
| 6 | 4.689403  | -0.253609 | -0.725086 |
| 1 | 5.437965  | 0.047947  | 0.010193  |
| 1 | 4.386412  | 0.629253  | -1.301342 |
| 1 | 5.143904  | -0.984707 | -1.402957 |

-----  
Cartesian coordinates of : BC10\_8

-----  
Atomic number (AN) and Cartesian coordinates  
AN X Y Z

```
-----  
8      2.872169      1.526109      0.779224  
1      2.181682      1.235001      1.410633  
6      2.480583      2.768670      0.212752  
1      3.205038      3.019375     -0.565573  
1      2.494368      3.562479      0.967796  
1      1.483837      2.719764     -0.240378  
8      -1.253589      2.223941      1.227325  
1      -0.467422      1.804117      1.631085  
6      -2.218184      1.191925      1.028605  
1      -3.154983      1.661682      0.721883  
1      -2.397977      0.628062      1.948263  
1      -1.902909      0.493556      0.244227  
8      -0.771640      3.116012     -1.234481  
1      -0.932997      2.902812     -0.283296  
6      -1.696366      4.098024     -1.666914  
1      -1.499422      4.298765     -2.721628  
1      -1.574356      5.029955     -1.104287  
1      -2.731790      3.751762     -1.562852  
8      3.749965     -0.536904     -0.701910  
1      3.471459      0.231227     -0.149970  
6      4.293318     -0.075963     -1.924639  
1      4.590342     -0.949376     -2.508398  
1      5.178350      0.545772     -1.750700  
1      3.559879      0.497651     -2.505175  
8      0.762544      0.704720      2.316592  
1      0.627821     -0.252552      2.020264  
6      0.773490      0.741355      3.739454  
1      0.993083      1.764654      4.049842  
1      1.541782      0.072802      4.139654  
1      -0.202405      0.449944      4.142477  
8      -0.558569      0.568735     -2.104546  
1      -0.719185      1.527359     -1.962820  
6      0.538176      0.196979     -1.286473  
1      0.686156     -0.882251     -1.381914  
1      0.355859      0.432681     -0.226895  
1      1.456678      0.706089     -1.599802  
8      -3.783542     -1.391295      0.694284  
1      -3.346346     -1.331392     -0.177326  
6      -5.178822     -1.335263      0.499025  
1      -5.654864     -1.405742      1.479864  
1      -5.541647     -2.166202     -0.120312  
1      -5.490842     -0.392292      0.029917  
8      0.456734     -1.740258      1.621862  
1      1.101835     -2.048744      0.936762  
6      -0.855945     -2.120117      1.215620  
1      -1.572471     -1.728432      1.938441  
1      -0.948758     -3.210569      1.183799  
1      -1.102482     -1.708219      0.230329  
8      2.094968     -2.570187     -0.296497  
1      2.704622     -1.830095     -0.536900  
6      2.868166     -3.715024      0.027532  
1      2.190630     -4.473074      0.425943  
1      3.626587     -3.484082      0.783540  
1      3.360545     -4.118807     -0.863579  
8      -2.531371     -1.226745     -1.756742  
1      -1.894102     -0.499122     -1.934426  
6      -2.039884     -2.418796     -2.341104  
1      -2.721113     -3.227876     -2.067125  
1      -1.036369     -2.669489     -1.971940  
1      -2.006662     -2.340934     -3.433460  
-----
```

Cartesian coordinates of : BC10\_1

```
-----
```



## Atomic number (AN) and Cartesian coordinates

| AN | X         | Y         | Z         |
|----|-----------|-----------|-----------|
| 8  | -2.918937 | -1.546859 | -0.706790 |
| 1  | -1.953841 | -1.734824 | -0.694715 |
| 6  | -3.393299 | -1.831506 | -2.010779 |
| 1  | -4.483435 | -1.888891 | -1.967592 |
| 1  | -3.001176 | -2.788610 | -2.370300 |
| 1  | -3.108249 | -1.044627 | -2.721566 |
| 8  | 3.471222  | 1.992440  | -0.654016 |
| 1  | 2.618452  | 2.181261  | -0.215136 |
| 6  | 3.306840  | 2.077502  | -2.062687 |
| 1  | 4.279822  | 1.875833  | -2.515248 |
| 1  | 2.987236  | 3.081769  | -2.362095 |
| 1  | 2.581620  | 1.337242  | -2.421140 |
| 8  | -1.038314 | -0.272723 | 1.085740  |
| 1  | -0.159630 | -0.701181 | 1.095740  |
| 6  | -1.810041 | -0.780174 | 2.155416  |
| 1  | -2.737535 | -0.202593 | 2.192202  |
| 1  | -1.292958 | -0.669209 | 3.118538  |
| 1  | -2.071903 | -1.835982 | 2.005698  |
| 8  | -1.280575 | 2.606508  | 0.865541  |
| 1  | -1.875956 | 1.842092  | 0.711665  |
| 6  | -1.703125 | 3.663623  | 0.021683  |
| 1  | -0.983169 | 4.478332  | 0.124395  |
| 1  | -2.692327 | 4.027584  | 0.319759  |
| 1  | -1.745191 | 3.344449  | -1.025670 |
| 8  | -0.391066 | -2.487160 | -1.042082 |
| 1  | 0.282870  | -1.806218 | -0.847975 |
| 6  | -0.262571 | -3.580390 | -0.153212 |
| 1  | -0.952915 | -4.356423 | -0.492409 |
| 1  | -0.523191 | -3.297116 | 0.874334  |
| 1  | 0.756957  | -3.980409 | -0.154512 |
| 8  | 0.915570  | -0.066420 | -1.210991 |
| 1  | 1.073608  | 0.474666  | -0.410389 |
| 6  | -0.191700 | 0.505984  | -1.893508 |
| 1  | -0.459643 | -0.171826 | -2.707945 |
| 1  | 0.069901  | 1.484000  | -2.320665 |
| 1  | -1.053211 | 0.622226  | -1.225575 |
| 8  | -3.279595 | 1.038785  | -0.107387 |
| 1  | -3.066218 | 0.088919  | -0.272843 |
| 6  | -4.670344 | 1.160469  | 0.100530  |
| 1  | -4.891156 | 2.210789  | 0.305856  |
| 1  | -5.007491 | 0.559447  | 0.954859  |
| 1  | -5.236709 | 0.854885  | -0.788213 |
| 8  | 3.627761  | -0.600956 | 0.126979  |
| 1  | 3.657532  | 0.350893  | -0.123192 |
| 6  | 3.820594  | -1.382506 | -1.045943 |
| 1  | 3.772857  | -2.433549 | -0.750529 |
| 1  | 4.805518  | -1.188327 | -1.484259 |
| 1  | 3.033361  | -1.182790 | -1.780701 |
| 8  | 1.178398  | 1.796077  | 0.797133  |
| 1  | 0.230130  | 2.121370  | 0.806431  |
| 6  | 1.567089  | 1.491787  | 2.129099  |
| 1  | 2.551525  | 1.015402  | 2.093939  |
| 1  | 0.853540  | 0.798757  | 2.588181  |
| 1  | 1.631862  | 2.402862  | 2.733230  |
| 8  | 1.411379  | -1.547217 | 1.196357  |
| 1  | 2.210262  | -1.114168 | 0.798889  |
| 6  | 1.787569  | -2.165267 | 2.411165  |
| 1  | 0.923992  | -2.719563 | 2.789500  |
| 1  | 2.086644  | -1.425647 | 3.165192  |
| 1  | 2.615403  | -2.867748 | 2.259810  |

Cartesian coordinates of : BC10\_6

-----  
Atomic number (AN) and Cartesian coordinates

| AN | X         | Y         | Z         |
|----|-----------|-----------|-----------|
| 8  | -2.907680 | -1.299075 | 0.375431  |
| 1  | -2.449848 | -0.682128 | 1.003817  |
| 6  | -4.005148 | -1.898464 | 1.043546  |
| 1  | -4.465011 | -2.613124 | 0.357615  |
| 1  | -4.752089 | -1.146892 | 1.322197  |
| 1  | -3.683057 | -2.431462 | 1.945298  |
| 8  | 3.125658  | 0.448731  | -1.935351 |
| 1  | 3.114922  | -0.401436 | -1.446717 |
| 6  | 3.631233  | 1.428358  | -1.039573 |
| 1  | 3.674484  | 2.378464  | -1.575908 |
| 1  | 4.640306  | 1.169434  | -0.700289 |
| 1  | 2.978853  | 1.553012  | -0.165254 |
| 8  | -1.403388 | -2.884606 | -1.119324 |
| 1  | -1.969436 | -2.316872 | -0.541371 |
| 6  | -1.672616 | -2.565927 | -2.471760 |
| 1  | -0.967866 | -3.119165 | -3.095949 |
| 1  | -1.549041 | -1.492578 | -2.667356 |
| 1  | -2.691230 | -2.859139 | -2.750490 |
| 8  | 3.004399  | -1.571981 | -0.139498 |
| 1  | 2.190580  | -2.124335 | -0.036312 |
| 6  | 4.107323  | -2.264827 | 0.414695  |
| 1  | 5.001436  | -1.659618 | 0.248494  |
| 1  | 4.249797  | -3.241231 | -0.060844 |
| 1  | 3.980169  | -2.410797 | 1.494545  |
| 8  | -1.886815 | 0.446877  | 2.043190  |
| 1  | -0.926845 | 0.529037  | 2.236954  |
| 6  | -2.336652 | 1.727041  | 1.609231  |
| 1  | -3.412929 | 1.654833  | 1.433236  |
| 1  | -1.846968 | 2.032250  | 0.675860  |
| 1  | -2.154343 | 2.480605  | 2.382807  |
| 8  | 0.672169  | 1.187673  | 2.318133  |
| 1  | 0.743041  | 1.835997  | 1.580254  |
| 6  | 1.932880  | 0.589978  | 2.566485  |
| 1  | 1.831315  | -0.035078 | 3.456714  |
| 1  | 2.695438  | 1.352330  | 2.762850  |
| 1  | 2.263470  | -0.038723 | 1.727431  |
| 8  | 0.838353  | -3.019596 | 0.364394  |
| 1  | 0.132772  | -3.084166 | -0.316802 |
| 6  | 0.242511  | -2.482002 | 1.534788  |
| 1  | 0.989726  | -2.509568 | 2.331509  |
| 1  | -0.624794 | -3.076494 | 1.842191  |
| 1  | -0.075493 | -1.440813 | 1.387521  |
| 8  | 0.758364  | 2.908362  | 0.252215  |
| 1  | 0.623464  | 2.464291  | -0.607036 |
| 6  | 0.054090  | 4.144276  | 0.296350  |
| 1  | -0.035131 | 4.430813  | 1.346735  |
| 1  | -0.941882 | 4.041911  | -0.144563 |
| 1  | 0.611225  | 4.923569  | -0.234706 |
| 8  | 0.527186  | 1.068187  | -1.803913 |
| 1  | 1.445096  | 0.904690  | -2.122503 |
| 6  | 0.244259  | 0.041310  | -0.857314 |
| 1  | -0.754574 | 0.227845  | -0.446910 |
| 1  | 0.969591  | 0.054615  | -0.034079 |
| 1  | 0.258374  | -0.947075 | -1.326952 |
| 8  | -1.878350 | 2.427751  | -1.715809 |
| 1  | -1.095821 | 1.982818  | -2.077484 |
| 6  | -3.003477 | 1.581431  | -1.864524 |
| 1  | -3.870877 | 2.125725  | -1.483552 |
| 1  | -2.902862 | 0.648786  | -1.291202 |
| 1  | -3.189554 | 1.334031  | -2.917034 |

  
-----

Cartesian coordinates of : BC10\_15

-----  
Atomic number (AN) and Cartesian coordinates

| AN | X         | Y         | Z         |
|----|-----------|-----------|-----------|
| 6  | 2.154788  | 4.514599  | 0.092337  |
| 8  | 1.509580  | 3.383839  | -0.463350 |
| 8  | 2.763038  | 1.068225  | -0.476639 |
| 6  | 2.658314  | 0.595813  | -1.814726 |
| 8  | 2.732630  | -0.806517 | 1.294382  |
| 6  | 3.446018  | -0.381926 | 2.444892  |
| 8  | 0.692417  | -2.533083 | 0.958572  |
| 6  | 1.166231  | -3.099885 | -0.263359 |
| 8  | -1.857289 | -2.237122 | 0.873017  |
| 6  | -2.346009 | -3.330319 | 1.638630  |
| 8  | -1.054844 | 3.968944  | -0.231146 |
| 6  | -1.563941 | 4.579160  | -1.404311 |
| 8  | -3.134378 | 2.496516  | 0.517335  |
| 6  | -3.998417 | 3.001978  | 1.518313  |
| 8  | -3.511131 | -0.143772 | 0.571894  |
| 6  | -4.130179 | -0.660247 | -0.594613 |
| 8  | -1.983134 | -3.411073 | -1.681482 |
| 6  | -3.264550 | -3.948158 | -1.920713 |
| 1  | 1.898914  | 4.644362  | 1.149840  |
| 1  | 1.886606  | 5.427583  | -0.451482 |
| 1  | 3.232620  | 4.360363  | 0.005002  |
| 1  | 0.532020  | 3.491340  | -0.361618 |
| 1  | 3.165618  | 1.279297  | -2.503506 |
| 1  | 1.609896  | 0.496728  | -2.117764 |
| 1  | 3.139282  | -0.384849 | -1.860136 |
| 1  | 2.271991  | 1.924509  | -0.400454 |
| 1  | 2.880581  | 0.369255  | 3.007057  |
| 1  | 4.419315  | 0.037888  | 2.166196  |
| 1  | 3.606943  | -1.253283 | 3.082708  |
| 1  | 2.666257  | -0.044536 | 0.646771  |
| 1  | -3.401288 | -0.832596 | -1.395703 |
| 1  | -4.863199 | 0.074138  | -0.935334 |
| 1  | -2.818096 | -0.783392 | 0.839544  |
| 1  | 1.999598  | -3.783115 | -0.073105 |
| 1  | 1.498342  | -2.319308 | -0.956413 |
| 1  | 0.338774  | -3.647167 | -0.721066 |
| 1  | 1.349558  | -1.871289 | 1.259510  |
| 1  | -1.994869 | -3.274872 | 2.673630  |
| 1  | -2.025748 | -4.283450 | 1.201412  |
| 1  | -3.438130 | -3.283277 | 1.632003  |
| 1  | -0.856749 | -2.236774 | 0.933910  |
| 1  | -2.397518 | 5.249919  | -1.168033 |
| 1  | -1.902874 | 3.832606  | -2.130783 |
| 1  | -0.757883 | 5.165352  | -1.852185 |
| 1  | -1.746768 | 3.364800  | 0.126632  |
| 1  | -3.727979 | 2.626121  | 2.511346  |
| 1  | -5.040898 | 2.736974  | 1.309548  |
| 1  | -3.906250 | 4.090585  | 1.518095  |
| 1  | -3.181342 | 1.512535  | 0.519383  |
| 1  | -3.160493 | -4.723337 | -2.682856 |
| 1  | -3.696224 | -4.408218 | -1.020710 |
| 1  | -3.967294 | -3.191818 | -2.296823 |
| 1  | -2.011991 | -2.854080 | -0.885013 |
| 1  | -4.651167 | -1.600836 | -0.377309 |
| 6  | 5.459784  | -1.127749 | -0.527852 |
| 1  | 6.065045  | -1.234523 | -1.430821 |
| 1  | 6.106132  | -1.310749 | 0.341427  |
| 1  | 5.083371  | -0.095932 | -0.478666 |
| 8  | 4.406502  | -2.066992 | -0.607520 |

1 3.796539 -1.878282 0.123669

-----  
Cartesian coordinates of : BC10\_14

-----  
Atomic number (AN) and Cartesian coordinates

| AN | X         | Y         | Z         |
|----|-----------|-----------|-----------|
| 6  | 1.501296  | 2.773000  | 0.618199  |
| 8  | 2.073304  | 2.290190  | -0.591777 |
| 8  | 3.712808  | 0.345138  | -0.242093 |
| 6  | 5.026507  | 0.737133  | -0.612167 |
| 8  | 2.765089  | -2.140578 | -0.635451 |
| 6  | 3.418035  | -2.873148 | 0.392879  |
| 8  | 0.146773  | -2.392288 | -0.557645 |
| 6  | -0.299074 | -2.957370 | -1.784604 |
| 8  | -1.589513 | -1.254073 | 0.949775  |
| 6  | -1.834211 | -2.190653 | 1.990150  |
| 8  | -0.078370 | 1.911426  | -2.059633 |
| 6  | -0.400595 | 0.578323  | -1.686993 |
| 8  | -1.876675 | 3.173035  | -0.487815 |
| 6  | -1.817673 | 4.478341  | 0.055895  |
| 8  | -2.515387 | 1.275474  | 1.303421  |
| 6  | -3.811570 | 0.916856  | 0.840817  |
| 8  | -3.434274 | -1.900114 | -1.084176 |
| 6  | -4.731140 | -2.206547 | -0.620680 |
| 1  | 0.459193  | 2.442313  | 0.715703  |
| 1  | 1.531422  | 3.867597  | 0.644424  |
| 1  | 2.074232  | 2.371677  | 1.458667  |
| 1  | 1.355306  | 2.227494  | -1.272600 |
| 1  | 5.329328  | 1.640812  | -0.073480 |
| 1  | 5.093797  | 0.921567  | -1.689179 |
| 1  | 5.706982  | -0.075452 | -0.348859 |
| 1  | 3.070396  | 1.091894  | -0.438289 |
| 1  | 3.407204  | -2.326439 | 1.343321  |
| 1  | 4.453337  | -3.096411 | 0.113174  |
| 1  | 2.879977  | -3.815151 | 0.520110  |
| 1  | 3.113372  | -1.221557 | -0.632322 |
| 1  | -3.796166 | 0.640181  | -0.220764 |
| 1  | -4.460341 | 1.784889  | 0.972946  |
| 1  | -1.968943 | 0.465231  | 1.260634  |
| 1  | 0.034761  | -3.996619 | -1.873836 |
| 1  | 0.080940  | -2.387089 | -2.639761 |
| 1  | -1.390861 | -2.922043 | -1.791446 |
| 1  | 1.129686  | -2.265797 | -0.572460 |
| 1  | -0.965015 | -2.282493 | 2.650377  |
| 1  | -2.075880 | -3.176205 | 1.575910  |
| 1  | -2.683759 | -1.830038 | 2.575769  |
| 1  | -0.855963 | -1.616520 | 0.369663  |
| 1  | -1.248654 | 0.192078  | -2.263631 |
| 1  | -0.638859 | 0.510811  | -0.616867 |
| 1  | 0.475079  | -0.046851 | -1.880442 |
| 1  | -0.758546 | 2.498001  | -1.664467 |
| 1  | -1.050521 | 4.558094  | 0.835546  |
| 1  | -2.784480 | 4.775078  | 0.477972  |
| 1  | -1.566432 | 5.165339  | -0.754420 |
| 1  | -2.058201 | 2.520694  | 0.226171  |
| 1  | -5.240354 | -2.761984 | -1.410772 |
| 1  | -4.710494 | -2.832336 | 0.281732  |
| 1  | -5.317831 | -1.302495 | -0.406558 |
| 1  | -2.900668 | -1.549362 | -0.350411 |
| 1  | -4.217788 | 0.082701  | 1.425491  |
| 6  | 1.315926  | -0.412142 | 1.775861  |
| 1  | 0.534241  | -0.027502 | 2.438528  |
| 1  | 1.210195  | -1.505752 | 1.714002  |

|   |          |           |          |
|---|----------|-----------|----------|
| 1 | 1.148859 | 0.000565  | 0.770185 |
| 8 | 2.571792 | -0.036530 | 2.299947 |
| 1 | 3.192080 | 0.044892  | 1.557693 |

-----  
Cartesian coordinates of : BC10\_17

-----  
Atomic number (AN) and Cartesian coordinates

| AN | X         | Y         | Z         |
|----|-----------|-----------|-----------|
| 6  | -4.009985 | 2.146478  | -0.540761 |
| 8  | -3.092949 | 1.787278  | 0.485709  |
| 8  | -3.048903 | -0.751300 | 0.780908  |
| 6  | -3.895619 | -0.960514 | 1.902971  |
| 8  | -1.322745 | -2.740436 | 0.323833  |
| 6  | -2.193043 | -3.460073 | -0.532614 |
| 8  | 1.288647  | -2.854219 | -0.140934 |
| 6  | 1.810148  | -3.600389 | 0.953512  |
| 8  | 2.953991  | -1.023018 | -0.806754 |
| 6  | 3.625555  | -1.568498 | -1.934248 |
| 8  | -1.260397 | 3.675601  | 0.409730  |
| 6  | -1.285380 | 4.606398  | 1.476794  |
| 8  | 1.297440  | 3.648263  | -0.285020 |
| 6  | 1.591468  | 4.473412  | -1.398628 |
| 8  | 3.036399  | 1.649225  | -0.622922 |
| 6  | 4.207592  | 1.673357  | 0.174227  |
| 8  | 4.761771  | -1.843243 | 1.181529  |
| 6  | 6.065529  | -1.390667 | 0.893196  |
| 1  | -3.491808 | 2.317362  | -1.489900 |
| 1  | -4.560672 | 3.052065  | -0.264848 |
| 1  | -4.713883 | 1.320291  | -0.670053 |
| 1  | -2.342345 | 2.432050  | 0.492242  |
| 1  | -4.910355 | -0.600363 | 1.695061  |
| 1  | -3.508289 | -0.448829 | 2.789354  |
| 1  | -3.931641 | -2.035106 | 2.101618  |
| 1  | -2.939444 | 0.239566  | 0.654817  |
| 1  | -2.488376 | -2.861305 | -1.402606 |
| 1  | -3.095272 | -3.777804 | 0.004531  |
| 1  | -1.661570 | -4.349121 | -0.878495 |
| 1  | -1.781783 | -1.910512 | 0.576340  |
| 1  | 4.070851  | 1.117324  | 1.109533  |
| 1  | 4.427492  | 2.716311  | 0.412935  |
| 1  | 2.803828  | 0.708336  | -0.771588 |
| 1  | 1.544169  | -4.658291 | 0.858390  |
| 1  | 1.430779  | -3.218409 | 1.906693  |
| 1  | 2.898177  | -3.497901 | 0.944542  |
| 1  | 0.313859  | -2.751854 | -0.027936 |
| 1  | 2.923021  | -1.782822 | -2.745427 |
| 1  | 4.153276  | -2.490571 | -1.662470 |
| 1  | 4.353110  | -0.830036 | -2.281521 |
| 1  | 2.218976  | -1.654344 | -0.544530 |
| 1  | -0.962807 | 5.598286  | 1.140677  |
| 1  | -0.643895 | 4.285862  | 2.305004  |
| 1  | -2.315445 | 4.675522  | 1.834152  |
| 1  | -0.325841 | 3.556819  | 0.115151  |
| 1  | 1.473856  | 3.931043  | -2.343065 |
| 1  | 2.612642  | 4.866088  | -1.338203 |
| 1  | 0.891619  | 5.312267  | -1.384851 |
| 1  | 1.868018  | 2.847825  | -0.331755 |
| 1  | 6.766407  | -2.056198 | 1.401695  |
| 1  | 6.285497  | -1.419078 | -0.183383 |
| 1  | 6.238964  | -0.368837 | 1.257703  |
| 1  | 4.129229  | -1.391290 | 0.596982  |
| 1  | 5.061284  | 1.250981  | -0.370322 |
| 6  | -5.630453 | -2.341900 | -1.068272 |

|   |           |           |           |
|---|-----------|-----------|-----------|
| 1 | -6.605120 | -2.263712 | -1.554747 |
| 1 | -5.794711 | -2.580313 | -0.007890 |
| 1 | -5.083188 | -3.174184 | -1.531918 |
| 8 | -4.967983 | -1.109278 | -1.239450 |
| 1 | -4.185640 | -1.083731 | -0.661993 |

-----  
Cartesian coordinates of : BC10\_16  
-----

Atomic number (AN) and Cartesian coordinates  
AN X Y Z

|   |           |           |           |
|---|-----------|-----------|-----------|
| 6 | -4.445782 | 0.383045  | -1.539524 |
| 8 | -3.377162 | 0.183504  | -0.624314 |
| 8 | -2.431348 | -2.318358 | -0.504783 |
| 6 | -3.281333 | -2.709267 | 0.559954  |
| 8 | -0.043734 | -3.501534 | -0.514497 |
| 6 | -0.228081 | -4.550984 | -1.447617 |
| 8 | 2.402997  | -2.529979 | -0.311212 |
| 6 | 2.893388  | -3.097803 | 0.898298  |
| 8 | 3.377165  | -0.183508 | -0.624329 |
| 6 | 4.445786  | -0.383057 | -1.539535 |
| 8 | -2.402991 | 2.529978  | -0.311225 |
| 6 | -2.893392 | 3.097804  | 0.898281  |
| 8 | 0.043746  | 3.501515  | -0.514479 |
| 6 | 0.228058  | 4.550980  | -1.447588 |
| 8 | 2.431372  | 2.318366  | -0.504816 |
| 6 | 3.281376  | 2.709276  | 0.559906  |
| 8 | 4.857426  | -0.411761 | 1.753879  |
| 6 | 5.922230  | 0.511687  | 1.783796  |
| 1 | -4.081275 | 0.788593  | -2.488385 |
| 1 | -5.193096 | 1.066930  | -1.119645 |
| 1 | -4.914526 | -0.587024 | -1.725550 |
| 1 | -2.886424 | 1.054016  | -0.521554 |
| 1 | -4.333971 | -2.677580 | 0.252619  |
| 1 | -3.146637 | -2.068645 | 1.439726  |
| 1 | -3.027271 | -3.736723 | 0.830277  |
| 1 | -2.603378 | -1.368796 | -0.680761 |
| 1 | -0.507491 | -4.166948 | -2.434802 |
| 1 | -1.000059 | -5.249623 | -1.105949 |
| 1 | 0.718496  | -5.089542 | -1.533190 |
| 1 | -0.869899 | -2.966810 | -0.473106 |
| 1 | 3.146652  | 2.068694  | 1.439702  |
| 1 | 3.027363  | 3.736754  | 0.830190  |
| 1 | 2.603392  | 1.368802  | -0.680788 |
| 1 | 3.070392  | -4.171455 | 0.774286  |
| 1 | 2.187331  | -2.942911 | 1.720383  |
| 1 | 3.834947  | -2.602194 | 1.147764  |
| 1 | 1.467032  | -2.817613 | -0.445737 |
| 1 | 4.081276  | -0.788584 | -2.488405 |
| 1 | 5.193084  | -1.066962 | -1.119662 |
| 1 | 4.914550  | 0.587005  | -1.725545 |
| 1 | 2.886428  | -1.054020 | -0.521558 |
| 1 | -3.070361 | 4.171463  | 0.774276  |
| 1 | -2.187358 | 2.942883  | 1.720379  |
| 1 | -3.834972 | 2.602221  | 1.147720  |
| 1 | -1.467019 | 2.817599  | -0.445733 |
| 1 | 0.507454  | 4.166963  | -2.434785 |
| 1 | 1.000031  | 5.249628  | -1.105927 |
| 1 | -0.718530 | 5.089525  | -1.533134 |
| 1 | 0.869923  | 2.966806  | -0.473105 |
| 1 | 6.682429  | 0.117235  | 2.461430  |
| 1 | 6.381787  | 0.646845  | 0.794446  |
| 1 | 5.607066  | 1.494952  | 2.159210  |
| 1 | 4.253052  | -0.182202 | 1.027174  |

|   |           |           |          |
|---|-----------|-----------|----------|
| 1 | 4.334013  | 2.677530  | 0.252572 |
| 6 | -5.922255 | -0.511690 | 1.783751 |
| 1 | -6.682490 | -0.117248 | 2.461349 |
| 1 | -5.607081 | -1.494942 | 2.159190 |
| 1 | -6.381768 | -0.646871 | 0.794384 |
| 8 | -4.857472 | 0.411784  | 1.753866 |
| 1 | -4.253062 | 0.182226  | 1.027190 |

-----  
Cartesian coordinates of : BC10\_12

-----  
Atomic number (AN) and Cartesian coordinates

| AN | X         | Y         | Z         |
|----|-----------|-----------|-----------|
| 8  | 1.040634  | 1.094830  | 2.253866  |
| 1  | 0.635620  | 0.250789  | 2.548250  |
| 6  | 0.003021  | 2.064309  | 2.170083  |
| 1  | 0.412329  | 2.962716  | 1.703908  |
| 1  | -0.374808 | 2.315023  | 3.168078  |
| 1  | -0.823918 | 1.705914  | 1.544366  |
| 8  | 0.797345  | -1.125383 | -1.338725 |
| 1  | 1.751412  | -1.062789 | -1.577814 |
| 6  | 0.335551  | 0.216899  | -1.138343 |
| 1  | -0.748545 | 0.231962  | -1.288363 |
| 1  | 0.803751  | 0.895084  | -1.856811 |
| 1  | 0.560635  | 0.563116  | -0.123380 |
| 8  | -0.504478 | 3.035437  | -0.831535 |
| 1  | -1.280860 | 2.534828  | -0.516061 |
| 6  | -0.736191 | 3.412425  | -2.171295 |
| 1  | 0.177037  | 3.881691  | -2.547108 |
| 1  | -1.557370 | 4.135112  | -2.257942 |
| 1  | -0.966441 | 2.546610  | -2.807621 |
| 8  | -2.710281 | 1.606488  | -0.016102 |
| 1  | -2.939403 | 0.662124  | -0.180430 |
| 6  | -3.534408 | 2.136472  | 1.003181  |
| 1  | -3.223098 | 3.169600  | 1.177201  |
| 1  | -3.428313 | 1.578785  | 1.942316  |
| 1  | -4.590216 | 2.134573  | 0.708018  |
| 8  | 1.360470  | -2.441761 | 1.025898  |
| 1  | 1.103640  | -1.980410 | 0.200815  |
| 6  | 2.741821  | -2.202049 | 1.258958  |
| 1  | 3.005936  | -2.692870 | 2.197230  |
| 1  | 2.957758  | -1.129796 | 1.343161  |
| 1  | 3.353100  | -2.624450 | 0.453727  |
| 8  | -0.347104 | -1.209670 | 2.736371  |
| 1  | 0.295013  | -1.818040 | 2.317038  |
| 6  | -1.452988 | -1.131084 | 1.849302  |
| 1  | -2.138872 | -0.369380 | 2.226164  |
| 1  | -1.992374 | -2.083234 | 1.790479  |
| 1  | -1.135526 | -0.840222 | 0.838321  |
| 8  | -3.407494 | -0.938933 | -0.473597 |
| 1  | -2.683484 | -1.533469 | -0.783551 |
| 6  | -4.496088 | -1.045219 | -1.376952 |
| 1  | -5.266109 | -0.340857 | -1.054746 |
| 1  | -4.918491 | -2.055704 | -1.364536 |
| 1  | -4.194808 | -0.795581 | -2.400306 |
| 8  | 3.317221  | -0.378855 | -1.475721 |
| 1  | 3.257077  | 0.265198  | -0.722517 |
| 6  | 4.651178  | -0.817966 | -1.634572 |
| 1  | 4.662394  | -1.592316 | -2.404340 |
| 1  | 5.050023  | -1.239733 | -0.703717 |
| 1  | 5.301788  | 0.003501  | -1.955372 |
| 8  | -1.515699 | -2.577134 | -1.401495 |
| 1  | -0.648142 | -2.169657 | -1.586397 |
| 6  | -1.321951 | -3.778718 | -0.664730 |

|   |           |           |           |
|---|-----------|-----------|-----------|
| 1 | -2.292378 | -4.071724 | -0.257453 |
| 1 | -0.615471 | -3.636449 | 0.160331  |
| 1 | -0.958246 | -4.578882 | -1.317662 |
| 8 | 3.069456  | 1.373250  | 0.474297  |
| 1 | 2.400018  | 1.202849  | 1.173928  |
| 6 | 2.807422  | 2.659893  | -0.080798 |
| 1 | 3.435741  | 2.767192  | -0.968730 |
| 1 | 3.074806  | 3.446703  | 0.633141  |
| 1 | 1.754034  | 2.766265  | -0.366673 |

-----
