# Supplementary material for: Solvation energies of the proton in methanol revisited and temperature effects
Source: Royal Society of Chemistry journal article supplement (doi:10.1039/c8cp05823g), 2018-01-01
Supplement: c8cp05823g2.pdf [file c8cp05823g2.pdf]

Fichier : /media/fifen/DIFFEO/SOLVATION...metries\_MeOH\_Solvent\_Phase.dat sur 71

Optimized Cartesian coordinates of the neutral methanol clusters in the solvent phase (methanol)

Cartesian coordinates of the methanol dimer

Cartesian coordinates of : MeOH\_2.log

-----  
Atomic number (AN) and Cartesian coordinates

| AN | X         | Y         | Z         |
|----|-----------|-----------|-----------|
| 6  | -1.961335 | 0.458928  | 0.281305  |
| 1  | -1.408558 | 1.404294  | 0.215090  |
| 1  | -1.998322 | 0.148079  | 1.332327  |
| 1  | -2.982402 | 0.631828  | -0.064564 |
| 8  | -1.390216 | -0.542009 | -0.542881 |
| 1  | -0.472786 | -0.674183 | -0.245055 |
| 6  | 1.979561  | 0.479102  | -0.264890 |
| 1  | 2.321975  | 0.065150  | -1.217649 |
| 1  | 2.840134  | 0.816085  | 0.319518  |
| 1  | 1.328188  | 1.331735  | -0.461551 |
| 8  | 1.205274  | -0.470458 | 0.465234  |
| 1  | 1.741950  | -1.251437 | 0.644573  |

-----

Cartesian coordinates of the methanol trimer

Cartesian coordinates of : MeOH\_2\_1.log

-----  
Atomic number (AN) and Cartesian coordinates

| AN | X         | Y         | Z         |
|----|-----------|-----------|-----------|
| 6  | -2.638731 | -0.496866 | -0.178000 |
| 1  | -2.203300 | -1.476236 | 0.055440  |
| 1  | -2.774595 | -0.420937 | -1.262884 |
| 1  | -3.618632 | -0.433847 | 0.298841  |
| 8  | -1.849639 | 0.564774  | 0.329989  |
| 1  | -1.010624 | 0.611436  | -0.157445 |
| 6  | 0.738869  | -1.922376 | 0.248755  |
| 1  | 0.113765  | -2.111834 | -0.633117 |
| 1  | 0.176111  | -1.291998 | 0.949982  |
| 1  | 0.951889  | -2.876820 | 0.733882  |
| 8  | 1.977707  | -1.332737 | -0.107122 |
| 1  | 1.772295  | -0.456558 | -0.471072 |
| 6  | 1.100472  | 1.983224  | 0.449813  |
| 1  | 0.400950  | 2.819090  | 0.530325  |
| 1  | 2.120497  | 2.358815  | 0.340201  |
| 1  | 1.035895  | 1.372188  | 1.351254  |
| 8  | 0.750072  | 1.130046  | -0.646156 |
| 1  | 0.806962  | 1.626154  | -1.472505 |

-----

Cartesian coordinates of : MeOH\_3.log

-----  
Atomic number (AN) and Cartesian coordinates

| AN | X         | Y         | Z         |
|----|-----------|-----------|-----------|
| 8  | 0.825351  | 1.665369  | -0.711457 |
| 1  | 0.924312  | 0.710960  | -0.889931 |
| 8  | 0.826731  | -1.103144 | -0.680937 |
| 1  | -0.076559 | -1.200773 | -0.319518 |
| 8  | -1.648745 | -0.859421 | 0.450444  |

|   |           |           |           |
|---|-----------|-----------|-----------|
| 1 | -2.263896 | -1.549901 | 0.724052  |
| 6 | 0.735588  | 1.812026  | 0.695536  |
| 1 | 1.700861  | 1.629957  | 1.184888  |
| 1 | 0.428668  | 2.838497  | 0.907240  |
| 1 | -0.009114 | 1.128801  | 1.125936  |
| 6 | 1.754758  | -1.557097 | 0.296391  |
| 1 | 1.579881  | -1.077381 | 1.266292  |
| 1 | 1.699688  | -2.643584 | 0.420021  |
| 1 | 2.755334  | -1.292917 | -0.050421 |
| 6 | -2.357324 | 0.165309  | -0.248730 |
| 1 | -2.902294 | -0.243622 | -1.104058 |
| 1 | -3.053221 | 0.681191  | 0.418661  |
| 1 | -1.608484 | 0.874908  | -0.606737 |

-----  
 Cartesian coordinates of : MeOH\_3r\_UUN.log

-----  
 Atomic number (AN) and Cartesian coordinates

| AN | X         | Y         | Z         |
|----|-----------|-----------|-----------|
| 6  | 1.109103  | -2.079770 | 0.433001  |
| 8  | 0.442070  | -1.522729 | -0.693349 |
| 8  | -1.476659 | 0.184148  | 0.410431  |
| 6  | -2.818982 | 0.390171  | -0.009353 |
| 8  | 0.891735  | 1.222663  | -0.580415 |
| 6  | 1.842753  | 1.782380  | 0.315935  |
| 1  | 0.997515  | -1.441912 | 1.318327  |
| 1  | 2.175117  | -2.227914 | 0.232190  |
| 1  | 0.651714  | -3.048401 | 0.639390  |
| 1  | 0.826805  | -0.641964 | -0.863041 |
| 1  | 1.889900  | 1.219140  | 1.254563  |
| 1  | 1.610150  | 2.828779  | 0.538081  |
| 1  | 2.817509  | 1.735212  | -0.171500 |
| 1  | 0.014241  | 1.196630  | -0.154944 |
| 1  | -3.466493 | -0.429372 | 0.318110  |
| 1  | -2.887713 | 0.490110  | -1.097692 |
| 1  | -3.164623 | 1.316289  | 0.451680  |
| 1  | -1.118523 | -0.625945 | 0.003998  |

-----  
 Cartesian coordinates of the methanol tetramer

Cartesian coordinates of : MeOH\_3\_112.log

-----  
 Atomic number (AN) and Cartesian coordinates

| AN | X         | Y         | Z         |
|----|-----------|-----------|-----------|
| 8  | -3.122806 | 0.651189  | -0.315377 |
| 1  | -2.344370 | 0.439581  | 0.234141  |
| 8  | -0.940615 | -0.297833 | 1.110218  |
| 1  | -0.227415 | 0.365074  | 1.149461  |
| 8  | 1.245597  | 1.362774  | 0.688634  |
| 1  | 1.507753  | 2.051997  | 1.312614  |
| 6  | -3.857485 | -0.547609 | -0.488212 |
| 1  | -4.123130 | -1.003923 | 0.473246  |
| 1  | -4.779275 | -0.301451 | -1.019381 |
| 1  | -3.302286 | -1.283732 | -1.083611 |
| 6  | -0.479171 | -1.379441 | 0.305871  |
| 1  | -0.502970 | -1.119288 | -0.760457 |
| 1  | 0.539850  | -1.669791 | 0.582126  |
| 1  | -1.148365 | -2.225431 | 0.472658  |
| 6  | 0.960194  | 1.954209  | -0.585628 |

|   |          |           |           |
|---|----------|-----------|-----------|
| 1 | 0.150717 | 2.683078  | -0.501241 |
| 1 | 1.851762 | 2.430532  | -0.999864 |
| 1 | 0.645581 | 1.143038  | -1.243962 |
| 6 | 3.071633 | -0.945388 | -0.982342 |
| 1 | 3.740396 | -1.769604 | -1.236671 |
| 1 | 2.078302 | -1.167987 | -1.393554 |
| 1 | 3.451609 | -0.031126 | -1.453866 |
| 8 | 3.043252 | -0.836027 | 0.430731  |
| 1 | 2.487397 | -0.072408 | 0.656575  |

-----  
Cartesian coordinates of : MeOH\_3\_11.log

-----  
Atomic number (AN) and Cartesian coordinates

| AN | X         | Y         | Z         |
|----|-----------|-----------|-----------|
| 6  | 3.360366  | -0.505694 | -0.946976 |
| 1  | 4.206833  | 0.177943  | -0.831401 |
| 1  | 2.904169  | -0.352971 | -1.930454 |
| 1  | 3.723915  | -1.531691 | -0.880823 |
| 8  | 2.411538  | -0.325308 | 0.098215  |
| 1  | 2.029003  | 0.568980  | 0.046921  |
| 6  | -2.772783 | 0.230890  | -0.686765 |
| 1  | -2.131894 | 0.834515  | -1.343096 |
| 1  | -2.530719 | 0.465073  | 0.359878  |
| 1  | -3.811709 | 0.513429  | -0.866472 |
| 8  | -2.647414 | -1.153168 | -0.956381 |
| 1  | -1.737860 | -1.404526 | -0.725383 |
| 6  | -0.397869 | -1.379008 | 1.665165  |
| 1  | 0.049774  | -0.564802 | 2.246025  |
| 1  | 0.005583  | -2.334835 | 2.010974  |
| 1  | -1.478961 | -1.373802 | 1.818397  |
| 8  | -0.165665 | -1.198285 | 0.270428  |
| 1  | 0.801179  | -1.163255 | 0.114746  |
| 6  | -0.268963 | 2.610828  | 0.557750  |
| 1  | -0.440747 | 2.364050  | 1.610930  |
| 1  | -1.226580 | 2.855717  | 0.084785  |
| 1  | 0.382051  | 3.483920  | 0.501329  |
| 8  | 0.385351  | 1.549980  | -0.125206 |
| 1  | -0.139028 | 0.734407  | -0.047835 |

-----  
Cartesian coordinates of : MeOH\_3\_12.log

-----  
Atomic number (AN) and Cartesian coordinates

| AN | X         | Y         | Z         |
|----|-----------|-----------|-----------|
| 1  | 0.891973  | -0.029958 | 2.057435  |
| 6  | 0.118911  | -0.701238 | 1.669761  |
| 1  | 0.269337  | -1.703676 | 2.080702  |
| 1  | -0.859854 | -0.331684 | 1.981801  |
| 8  | 0.135555  | -0.728133 | 0.242937  |
| 1  | 1.032991  | -1.006175 | -0.045743 |
| 1  | 2.947807  | 0.600263  | -1.469270 |
| 6  | 3.229252  | 0.233160  | -0.478489 |
| 1  | 4.314853  | 0.275989  | -0.361370 |
| 1  | 2.763038  | 0.863757  | 0.280486  |
| 8  | 2.747253  | -1.094797 | -0.262960 |
| 1  | 3.107199  | -1.683072 | -0.937740 |
| 1  | -2.558274 | 0.366248  | -0.875671 |
| 6  | -3.022474 | -0.491354 | -0.373114 |
| 1  | -3.075041 | -0.281877 | 0.703605  |
| 1  | -4.041324 | -0.606576 | -0.748549 |
| 8  | -2.323812 | -1.695702 | -0.639394 |

|   |           |           |           |
|---|-----------|-----------|-----------|
| 1 | -1.391406 | -1.541685 | -0.407499 |
| 1 | 0.024584  | 2.476321  | 1.202351  |
| 6 | -0.747202 | 2.511333  | 0.423134  |
| 1 | -1.670855 | 2.072702  | 0.823177  |
| 1 | -0.941947 | 3.557094  | 0.177523  |
| 8 | -0.326612 | 1.859848  | -0.762518 |
| 1 | -0.143083 | 0.931192  | -0.533511 |

-----  
Cartesian coordinates of : MeOH\_4b.log

-----  
Atomic number (AN) and Cartesian coordinates

| AN | X         | Y         | Z         |
|----|-----------|-----------|-----------|
| 8  | -2.205889 | -1.296945 | -0.269233 |
| 1  | -1.693166 | -0.569304 | -0.672141 |
| 8  | -0.797011 | 0.948934  | -1.023650 |
| 1  | 0.160805  | 0.994401  | -0.810782 |
| 8  | 1.803817  | 1.138273  | -0.225059 |
| 1  | 2.190387  | 0.243207  | -0.310219 |
| 6  | -2.473183 | -0.921166 | 1.068858  |
| 1  | -3.174073 | -0.078399 | 1.124737  |
| 1  | -2.921310 | -1.777755 | 1.576739  |
| 1  | -1.555443 | -0.643236 | 1.605270  |
| 6  | -1.438668 | 2.079689  | -0.449168 |
| 1  | -1.355707 | 2.075671  | 0.644400  |
| 1  | -1.017568 | 3.013285  | -0.837017 |
| 1  | -2.495763 | 2.034001  | -0.719089 |
| 6  | 1.758006  | 1.464803  | 1.160522  |
| 1  | 1.100435  | 0.780110  | 1.710471  |
| 1  | 2.757128  | 1.434311  | 1.604895  |
| 1  | 1.363579  | 2.478621  | 1.246920  |
| 8  | 2.332236  | -1.531970 | -0.173219 |
| 1  | 2.864101  | -2.018606 | -0.814280 |
| 6  | 0.967890  | -1.944095 | -0.274540 |
| 1  | 0.565366  | -1.749748 | -1.273410 |
| 1  | 0.856813  | -3.004191 | -0.031967 |
| 1  | 0.404927  | -1.354082 | 0.450722  |

-----  
Cartesian coordinates of : MeOH\_4r.log

-----  
Atomic number (AN) and Cartesian coordinates

| AN | X         | Y         | Z         |
|----|-----------|-----------|-----------|
| 6  | -2.487387 | 1.646927  | 0.142481  |
| 1  | -2.505413 | 2.741409  | 0.139646  |
| 1  | -2.460235 | 1.292119  | 1.178686  |
| 1  | -3.399083 | 1.279490  | -0.331741 |
| 8  | -1.382909 | 1.152775  | -0.605151 |
| 1  | -0.544855 | 1.400852  | -0.151193 |
| 6  | 1.990456  | 2.114884  | -0.176527 |
| 1  | 2.023854  | 1.678703  | -1.181475 |
| 1  | 2.981486  | 2.035727  | 0.281677  |
| 1  | 1.724950  | 3.169847  | -0.259960 |
| 8  | 1.003155  | 1.482782  | 0.630080  |
| 1  | 1.222088  | 0.524963  | 0.694550  |
| 6  | 2.477906  | -1.617576 | -0.310143 |
| 1  | 2.375142  | -1.213368 | -1.323291 |
| 1  | 2.530692  | -2.709535 | -0.364412 |
| 1  | 3.405098  | -1.242267 | 0.126433  |
| 8  | 1.406600  | -1.199345 | 0.527076  |
| 1  | 0.551195  | -1.451192 | 0.109266  |
| 6  | -1.967691 | -2.058679 | 0.369171  |

|   |           |           |           |
|---|-----------|-----------|-----------|
| 1 | -2.996231 | -1.972303 | 0.004347  |
| 1 | -1.884188 | -1.541464 | 1.332137  |
| 1 | -1.733702 | -3.114220 | 0.515694  |
| 8 | -1.043545 | -1.537765 | -0.579656 |
| 1 | -1.236897 | -0.579683 | -0.699036 |

-----

Cartesian coordinates of : MeOH\_N4\_4r.log

-----

Atomic number (AN) and Cartesian coordinates

| AN | X         | Y         | Z         |
|----|-----------|-----------|-----------|
| 6  | 0.347433  | -0.340061 | -0.048951 |
| 8  | 0.028286  | -0.056686 | 1.308415  |
| 8  | 2.168446  | 0.101171  | 2.953709  |
| 6  | 1.857209  | 0.965635  | 4.040392  |
| 8  | 1.824847  | -2.512479 | 3.557682  |
| 6  | 2.728314  | -3.330419 | 2.823545  |
| 8  | -0.672846 | -2.359169 | 2.536779  |
| 6  | -1.634062 | -2.264735 | 3.581213  |
| 1  | -0.554857 | -0.568488 | -0.624814 |
| 1  | 1.044874  | -1.181886 | -0.126924 |
| 1  | 0.819125  | 0.548517  | -0.471318 |
| 1  | -0.353767 | -0.868826 | 1.715151  |
| 1  | -1.369562 | -1.478350 | 4.297036  |
| 1  | -1.729409 | -3.216232 | 4.113731  |
| 1  | -2.594722 | -2.018420 | 3.126357  |
| 1  | 0.210879  | -2.538370 | 2.934292  |
| 1  | 3.751596  | -3.215498 | 3.194442  |
| 1  | 2.705224  | -3.090123 | 1.754637  |
| 1  | 2.419646  | -4.368247 | 2.957976  |
| 1  | 2.060312  | -1.567216 | 3.409418  |
| 1  | 0.901787  | 0.694597  | 4.504124  |
| 1  | 1.812251  | 2.008647  | 3.711818  |
| 1  | 2.650396  | 0.863989  | 4.782675  |
| 1  | 1.436832  | 0.152327  | 2.295590  |

-----

Cartesian coordinates of : MeOH\_4r\_UUUU.log

-----

Atomic number (AN) and Cartesian coordinates

| AN | X         | Y         | Z         |
|----|-----------|-----------|-----------|
| 6  | -0.032853 | 2.199924  | 0.899631  |
| 8  | 0.030833  | 1.896550  | -0.489262 |
| 8  | -1.920168 | 0.039006  | -0.813672 |
| 6  | -2.905304 | -0.028952 | 0.210401  |
| 8  | -0.030827 | -1.896564 | -0.489255 |
| 6  | 0.032848  | -2.199875 | 0.899653  |
| 8  | 1.920172  | -0.039019 | -0.813674 |
| 6  | 2.905303  | 0.028926  | 0.210405  |
| 1  | -0.066065 | 1.286242  | 1.506253  |
| 1  | -0.911968 | 2.810342  | 1.130245  |
| 1  | 0.865632  | 2.762046  | 1.160247  |
| 1  | -0.746713 | 1.332774  | -0.702090 |
| 1  | -2.447912 | -0.082407 | 1.205233  |
| 1  | -3.558661 | -0.895969 | 0.070370  |
| 1  | -3.507656 | 0.878858  | 0.149820  |
| 1  | -1.337891 | -0.751581 | -0.756944 |
| 1  | 0.066019  | -1.286164 | 1.506233  |
| 1  | 0.911979  | -2.810252 | 1.130308  |
| 1  | -0.865623 | -2.762015 | 1.160279  |
| 1  | 0.746713  | -1.332787 | -0.702095 |
| 1  | 2.447905  | 0.082395  | 1.205234  |

|   |          |           |           |
|---|----------|-----------|-----------|
| 1 | 3.558675 | 0.895931  | 0.070375  |
| 1 | 3.507640 | -0.878893 | 0.149832  |
| 1 | 1.337895 | 0.751568  | -0.756939 |

-----  
Cartesian coordinates of : MeOH\_UUUD.log

-----  
Atomic number (AN) and Cartesian coordinates

| AN | X         | Y         | Z         |
|----|-----------|-----------|-----------|
| 6  | -3.135603 | -0.028581 | -0.680831 |
| 8  | -2.000061 | 0.013921  | 0.174445  |
| 8  | -0.043117 | 1.839784  | -0.212581 |
| 6  | 0.349160  | 2.350683  | 1.055889  |
| 8  | -0.125479 | -1.926021 | -0.136900 |
| 6  | 0.369244  | -2.138582 | 1.180940  |
| 8  | 1.626945  | -0.097116 | -1.113960 |
| 6  | 2.883230  | -0.038979 | -0.449498 |
| 1  | -3.776040 | -0.882754 | -0.439836 |
| 1  | -2.840860 | -0.086287 | -1.734064 |
| 1  | -3.701712 | 0.890607  | -0.523106 |
| 1  | -1.446130 | -0.785987 | 0.029400  |
| 1  | 0.527439  | -1.187137 | 1.703656  |
| 1  | 1.310802  | -2.696941 | 1.163306  |
| 1  | -0.376042 | -2.719219 | 1.726693  |
| 1  | 0.538902  | -1.378067 | -0.612014 |
| 1  | 2.759327  | 0.029941  | 0.637615  |
| 1  | 3.472457  | 0.815963  | -0.796555 |
| 1  | 3.424760  | -0.957127 | -0.683196 |
| 1  | 1.093741  | 0.691018  | -0.861184 |
| 1  | 0.513135  | 1.543361  | 1.779040  |
| 1  | -0.404769 | 3.037364  | 1.453554  |
| 1  | 1.284757  | 2.895973  | 0.919286  |
| 1  | -0.842255 | 1.277502  | -0.089629 |

-----  
Cartesian coordinates of : N4\_12.log

-----  
Atomic number (AN) and Cartesian coordinates

| AN | X         | Y         | Z         |
|----|-----------|-----------|-----------|
| 6  | -2.763254 | -0.260153 | -0.963009 |
| 8  | -1.382151 | -0.451295 | -1.255749 |
| 8  | -0.419355 | -1.429221 | 1.187541  |
| 6  | 0.844885  | -2.074773 | 1.317926  |
| 8  | -0.030057 | 1.202885  | 0.590396  |
| 6  | -0.470441 | 2.382981  | 1.256465  |
| 8  | 2.463240  | 0.600486  | -0.502597 |
| 6  | 1.931672  | -0.012902 | -1.663486 |
| 1  | -2.919072 | -0.057798 | 0.103420  |
| 1  | -3.182590 | 0.563298  | -1.549218 |
| 1  | -3.282018 | -1.182634 | -1.226419 |
| 1  | -0.905300 | 0.345226  | -0.964829 |
| 1  | 1.260905  | -0.847057 | -1.415379 |
| 1  | 1.379946  | 0.702349  | -2.286170 |
| 1  | 2.767364  | -0.406510 | -2.245253 |
| 1  | 1.710292  | 0.960989  | -0.001764 |
| 1  | 0.811958  | -3.091497 | 0.915426  |
| 1  | 1.635860  | -1.507267 | 0.812992  |
| 1  | 1.072468  | -2.124639 | 2.383490  |
| 1  | -0.706089 | -1.446398 | 0.255844  |
| 1  | -1.550522 | 2.354147  | 1.428535  |
| 1  | 0.047454  | 2.511734  | 2.211137  |
| 1  | -0.236048 | 3.227135  | 0.607482  |

1 -0.215196 0.405160 1.126599

-----  
 Cartesian coordinates of : N4\_20.log

-----  
 Atomic number (AN) and Cartesian coordinates

| AN | X         | Y         | Z         |
|----|-----------|-----------|-----------|
| 6  | 3.147818  | 0.267056  | 0.361706  |
| 8  | 2.014314  | -0.239422 | 1.043932  |
| 8  | 0.398911  | -1.114379 | -1.014890 |
| 6  | -0.406601 | -2.285638 | -0.925454 |
| 8  | -0.970185 | 1.283842  | -1.216255 |
| 6  | -0.099158 | 2.173822  | -0.506199 |
| 8  | -2.556820 | -0.104122 | 0.686630  |
| 6  | -1.595012 | -0.137036 | 1.728691  |
| 1  | 3.701814  | -0.527306 | -0.152665 |
| 1  | 2.870250  | 1.032319  | -0.374908 |
| 1  | 3.806490  | 0.725097  | 1.102311  |
| 1  | 1.421244  | -0.634443 | 0.375605  |
| 1  | 0.621657  | 2.633685  | -1.186410 |
| 1  | -0.674433 | 2.948974  | 0.006639  |
| 1  | 0.434447  | 1.567524  | 0.229702  |
| 1  | -1.372868 | 1.744910  | -1.962643 |
| 1  | -1.286081 | -2.114159 | -0.295667 |
| 1  | -0.730282 | -2.613866 | -1.918263 |
| 1  | 0.208432  | -3.068491 | -0.478987 |
| 1  | -0.146476 | -0.360420 | -1.302991 |
| 1  | -0.644479 | -0.570187 | 1.391436  |
| 1  | -1.399562 | 0.863662  | 2.133539  |
| 1  | -1.997113 | -0.762023 | 2.528330  |
| 1  | -2.185086 | 0.418150  | -0.042844 |

-----  
 Cartesian coordinates of : N4\_25.log

-----  
 Atomic number (AN) and Cartesian coordinates

| AN | X         | Y         | Z         |
|----|-----------|-----------|-----------|
| 6  | 3.453597  | 0.494311  | -0.014826 |
| 8  | 3.144042  | -0.872405 | -0.289065 |
| 8  | 0.426417  | -0.951763 | -0.333063 |
| 6  | 0.132455  | -1.325989 | 1.009588  |
| 8  | -0.908132 | 1.367083  | -0.583976 |
| 6  | -0.260276 | 2.221414  | 0.348878  |
| 8  | -3.144476 | 0.064229  | 0.394405  |
| 6  | -3.189415 | -0.998020 | -0.542689 |
| 1  | 4.492063  | 0.602238  | 0.308444  |
| 1  | 3.271124  | 1.125536  | -0.889381 |
| 1  | 2.794102  | 0.808966  | 0.795708  |
| 1  | 3.704209  | -1.192083 | -1.006529 |
| 1  | 0.180701  | -2.412605 | 1.132708  |
| 1  | 0.826142  | -0.853896 | 1.714109  |
| 1  | -0.883079 | -0.987090 | 1.233010  |
| 1  | 1.393840  | -1.017045 | -0.466249 |
| 1  | -0.075386 | 1.707035  | 1.300096  |
| 1  | 0.691997  | 2.590883  | -0.046798 |
| 1  | -0.916569 | 3.073509  | 0.533995  |
| 1  | -0.366242 | 0.550698  | -0.662166 |
| 1  | -3.532890 | -0.656575 | -1.527019 |
| 1  | -2.207832 | -1.475339 | -0.662372 |
| 1  | -3.894442 | -1.743930 | -0.169917 |
| 1  | -2.438720 | 0.672254  | 0.100253  |

Cartesian coordinates of the methanol pentamer

Cartesian coordinates of : MeOH\_3\_11\_12.log

-----  
Atomic number (AN) and Cartesian coordinates

| AN | X         | Y         | Z         |
|----|-----------|-----------|-----------|
| 8  | 0.745056  | -1.090763 | -1.912714 |
| 1  | -0.088980 | -1.153517 | -1.414496 |
| 8  | -1.449257 | -0.835744 | -0.202565 |
| 1  | -0.924308 | -1.002884 | 0.622617  |
| 8  | 1.437228  | 1.245194  | 0.993959  |
| 1  | 0.690385  | 1.569427  | 0.445354  |
| 6  | 0.695398  | 0.085869  | -2.702959 |
| 1  | 0.533791  | 0.981848  | -2.089764 |
| 1  | 1.657398  | 0.183515  | -3.210721 |
| 1  | -0.095046 | 0.032832  | -3.461064 |
| 6  | -2.744915 | -1.420227 | -0.110836 |
| 1  | -2.674885 | -2.501807 | 0.036690  |
| 1  | -3.315118 | -0.977242 | 0.711483  |
| 1  | -3.262698 | -1.222469 | -1.050008 |
| 6  | 2.567742  | 0.984778  | 0.164042  |
| 1  | 2.358127  | 0.175030  | -0.544033 |
| 1  | 2.863794  | 1.883970  | -0.385623 |
| 1  | 3.389098  | 0.686993  | 0.818213  |
| 6  | 1.195276  | -2.133037 | 1.419074  |
| 1  | 0.680501  | -3.079116 | 1.594385  |
| 1  | 1.478830  | -2.068090 | 0.362242  |
| 1  | 2.095409  | -2.100250 | 2.040713  |
| 8  | 0.297281  | -1.082301 | 1.772777  |
| 1  | 0.752872  | -0.222588 | 1.614242  |
| 6  | -1.710298 | 2.397117  | 0.831672  |
| 1  | -1.328217 | 3.396514  | 1.044280  |
| 1  | -2.764373 | 2.472404  | 0.547308  |
| 1  | -1.625290 | 1.784521  | 1.737051  |
| 8  | -0.931585 | 1.856055  | -0.232300 |
| 1  | -1.230302 | 0.934375  | -0.378083 |

-----  
Cartesian coordinates of : MeOH\_4\_13.log

-----  
Atomic number (AN) and Cartesian coordinates

| AN | X         | Y         | Z         |
|----|-----------|-----------|-----------|
| 8  | -0.664492 | 2.003540  | 0.656237  |
| 1  | -0.630861 | 1.040032  | 0.805732  |
| 8  | -0.666836 | -0.769930 | 0.711282  |
| 1  | 0.180447  | -1.147900 | 0.357602  |
| 8  | 1.559660  | -1.667640 | -0.380849 |
| 1  | 2.328996  | -1.172177 | -0.027092 |
| 6  | -0.666209 | 2.215035  | -0.745436 |
| 1  | -0.891142 | 3.268518  | -0.924547 |
| 1  | 0.312668  | 1.992413  | -1.191187 |
| 1  | -1.425441 | 1.601805  | -1.246829 |
| 6  | -1.044665 | -1.459294 | 1.899720  |
| 1  | -1.284037 | -2.505424 | 1.685263  |
| 1  | -0.247984 | -1.415204 | 2.648270  |
| 1  | -1.932917 | -0.966559 | 2.299776  |
| 6  | 1.437235  | -1.361993 | -1.767828 |
| 1  | 1.324519  | -0.283550 | -1.928270 |
| 1  | 2.308035  | -1.720384 | -2.324121 |
| 1  | 0.544968  | -1.868748 | -2.139025 |



|   |           |           |           |
|---|-----------|-----------|-----------|
| 8 | 3.452500  | 0.050349  | 0.498894  |
| 1 | 4.373457  | 0.056541  | 0.212544  |
| 6 | 2.890762  | 1.354854  | 0.348628  |
| 1 | 3.376242  | 2.067377  | 1.020772  |
| 1 | 2.977372  | 1.706551  | -0.683874 |
| 1 | 1.834161  | 1.279906  | 0.616077  |
| 6 | -3.657474 | 0.170998  | -0.156893 |
| 1 | -4.495232 | 0.555053  | -0.742767 |
| 1 | -4.058790 | -0.439539 | 0.661983  |
| 1 | -3.111894 | 1.021092  | 0.273133  |
| 8 | -2.834213 | -0.591382 | -1.023843 |
| 1 | -2.013417 | -0.786893 | -0.536371 |

-----  
Cartesian coordinates of : MeOH\_5b.log

-----  
Atomic number (AN) and Cartesian coordinates

| AN | X         | Y         | Z         |
|----|-----------|-----------|-----------|
| 8  | -2.833426 | -0.625314 | -0.132978 |
| 1  | -2.150206 | 0.054922  | -0.298362 |
| 8  | -0.806674 | 1.179228  | -0.623591 |
| 1  | -0.283832 | 1.169196  | 0.212010  |
| 8  | 0.452474  | 0.857776  | 1.729615  |
| 1  | 0.924886  | 0.014892  | 1.538972  |
| 6  | -2.921900 | -1.445212 | -1.282850 |
| 1  | -2.004502 | -2.027512 | -1.442755 |
| 1  | -3.748022 | -2.143785 | -1.133896 |
| 1  | -3.122907 | -0.858693 | -2.187651 |
| 6  | -1.069203 | 2.522934  | -1.001745 |
| 1  | -1.593162 | 3.067776  | -0.208822 |
| 1  | -0.140602 | 3.050960  | -1.245688 |
| 1  | -1.702829 | 2.499699  | -1.889987 |
| 6  | -0.627378 | 0.577559  | 2.616831  |
| 1  | -1.356536 | -0.098672 | 2.153785  |
| 1  | -0.264291 | 0.134689  | 3.549118  |
| 1  | -1.120598 | 1.524244  | 2.844120  |
| 8  | 1.447281  | -1.500304 | 0.887455  |
| 1  | 2.219006  | -1.305803 | 0.317631  |
| 6  | 0.377230  | -1.902833 | 0.034322  |
| 1  | -0.519859 | -2.005393 | 0.649609  |
| 1  | 0.181886  | -1.147846 | -0.737399 |
| 1  | 0.596373  | -2.863000 | -0.442945 |
| 8  | 3.175898  | -0.555490 | -0.990943 |
| 1  | 4.137060  | -0.552249 | -0.908837 |
| 6  | 2.703534  | 0.789617  | -1.093201 |
| 1  | 2.944147  | 1.363308  | -0.192663 |
| 1  | 3.127918  | 1.286266  | -1.969725 |
| 1  | 1.617963  | 0.737448  | -1.203127 |

-----  
Cartesian coordinates of : MeOH\_5r\_UUUUD.log

-----  
Atomic number (AN) and Cartesian coordinates

| AN | X         | Y         | Z         |
|----|-----------|-----------|-----------|
| 6  | -1.751783 | 2.049081  | 1.043103  |
| 8  | -1.212120 | 1.699879  | -0.225567 |
| 8  | 1.423578  | 1.436832  | 0.116913  |
| 6  | 2.211939  | 2.465000  | -0.470784 |
| 8  | 2.160929  | -1.006077 | -0.703401 |
| 6  | 3.160945  | -1.541262 | 0.156950  |
| 8  | -0.174567 | -2.111235 | 0.045017  |
| 6  | -0.234561 | -1.555122 | 1.354476  |

|   |           |           |           |
|---|-----------|-----------|-----------|
| 8 | -2.142799 | -0.668296 | -1.065983 |
| 6 | -3.436136 | -0.859301 | -0.506743 |
| 1 | -1.292520 | 2.966442  | 1.424817  |
| 1 | -1.606878 | 1.246163  | 1.775898  |
| 1 | -2.822519 | 2.219226  | 0.915164  |
| 1 | -0.231419 | 1.610662  | -0.135165 |
| 1 | -4.161176 | -0.169451 | -0.950818 |
| 1 | -3.428466 | -0.717190 | 0.580477  |
| 1 | -3.745899 | -1.882772 | -0.724182 |
| 1 | -1.825221 | 0.236488  | -0.828370 |
| 1 | 2.144006  | 2.444460  | -1.563570 |
| 1 | 3.261119  | 2.370055  | -0.173467 |
| 1 | 1.829961  | 3.422102  | -0.111185 |
| 1 | 1.734542  | 0.559275  | -0.214203 |
| 1 | -1.257093 | -1.579156 | 1.745573  |
| 1 | 0.126812  | -0.517455 | 1.363438  |
| 1 | 0.403511  | -2.155833 | 2.005525  |
| 1 | -0.897401 | -1.687411 | -0.475517 |
| 1 | 3.327655  | -2.602891 | -0.048722 |
| 1 | 2.887487  | -1.417872 | 1.211489  |
| 1 | 4.086558  | -0.995288 | -0.032217 |
| 1 | 1.324356  | -1.508749 | -0.562817 |

-----  
Cartesian coordinates of : MeOH\_5r\_UUUUU.log

-----  
Atomic number (AN) and Cartesian coordinates

| AN | X         | Y         | Z         |
|----|-----------|-----------|-----------|
| 6  | 0.027272  | -1.203073 | 1.448353  |
| 8  | 0.129538  | -2.030393 | 0.294716  |
| 8  | 2.221029  | -0.821440 | -0.885908 |
| 6  | 3.414788  | -1.114301 | -0.169690 |
| 8  | 1.239025  | 1.654255  | -0.564708 |
| 6  | 1.767804  | 2.149200  | 0.659039  |
| 8  | -2.136436 | -1.128606 | -0.848339 |
| 6  | -3.256623 | -1.269402 | 0.016895  |
| 8  | -1.439603 | 1.474593  | -0.733455 |
| 6  | -1.970989 | 2.175150  | 0.383885  |
| 1  | -0.761820 | -1.556765 | 2.120053  |
| 1  | -0.179744 | -0.162163 | 1.166721  |
| 1  | 0.981965  | -1.242331 | 1.977703  |
| 1  | -0.686910 | -1.870370 | -0.232097 |
| 1  | 3.697042  | -2.164546 | -0.291025 |
| 1  | 3.306835  | -0.893115 | 0.898648  |
| 1  | 4.208203  | -0.486860 | -0.579038 |
| 1  | 1.485252  | -1.377613 | -0.537864 |
| 1  | -4.147725 | -0.801735 | -0.414538 |
| 1  | -3.061138 | -0.824686 | 1.000245  |
| 1  | -3.446651 | -2.336233 | 0.146444  |
| 1  | -1.901717 | -0.172117 | -0.892193 |
| 1  | 2.848115  | 2.310145  | 0.581906  |
| 1  | 1.567965  | 1.462339  | 1.490161  |
| 1  | 1.284919  | 3.105155  | 0.869764  |
| 1  | 1.636670  | 0.768262  | -0.742981 |
| 1  | -1.726943 | 3.241124  | 0.330748  |
| 1  | -1.593304 | 1.769671  | 1.330768  |
| 1  | -3.056605 | 2.062797  | 0.363493  |
| 1  | -0.456346 | 1.556321  | -0.716253 |

-----  
Cartesian coordinates of : MeOH\_N5\_4r\_1.log

-----  
Atomic number (AN) and Cartesian coordinates

| AN | X         | Y         | Z         |
|----|-----------|-----------|-----------|
| 6  | -3.899681 | 0.382948  | -0.227168 |
| 8  | -2.647006 | 0.227290  | 0.429357  |
| 8  | -0.562410 | 1.786050  | -0.241717 |
| 6  | 0.091498  | 2.210440  | 0.951433  |
| 8  | 0.850227  | -0.264913 | -1.124205 |
| 6  | 1.569452  | -0.129557 | -2.346590 |
| 8  | -1.108213 | -1.932744 | -0.166032 |
| 6  | -0.463754 | -2.207338 | 1.075537  |
| 8  | 2.582195  | -0.592120 | 1.040922  |
| 6  | 3.534705  | 0.401032  | 0.702276  |
| 1  | -4.610248 | -0.381845 | 0.100643  |
| 1  | -3.789534 | 0.329815  | -1.315375 |
| 1  | -4.291126 | 1.365275  | 0.040709  |
| 1  | -2.247327 | -0.637258 | 0.186798  |
| 1  | 0.553382  | 1.363347  | 1.474396  |
| 1  | -0.610649 | 2.709895  | 1.625005  |
| 1  | 0.872101  | 2.918635  | 0.668070  |
| 1  | -1.389236 | 1.305889  | 0.004052  |
| 1  | -0.127823 | -1.283096 | 1.561476  |
| 1  | 0.397396  | -2.867890 | 0.933933  |
| 1  | -1.190246 | -2.703025 | 1.720837  |
| 1  | -0.450235 | -1.486800 | -0.735195 |
| 1  | 2.256990  | 0.720970  | -2.301845 |
| 1  | 0.886016  | 0.000707  | -3.190758 |
| 1  | 2.146141  | -1.044076 | -2.492870 |
| 1  | 0.357952  | 0.571742  | -0.913758 |
| 1  | 3.057958  | 1.370761  | 0.509566  |
| 1  | 4.121227  | 0.117698  | -0.180629 |
| 1  | 4.215408  | 0.513800  | 1.548375  |
| 1  | 1.930186  | -0.618184 | 0.317043  |

Cartesian coordinates of : MeOH\_N5\_5r.log

Atomic number (AN) and Cartesian coordinates

| AN | X         | Y         | Z         |
|----|-----------|-----------|-----------|
| 6  | -0.870268 | -0.479030 | -2.329258 |
| 8  | -1.413749 | -1.352681 | -1.343670 |
| 8  | 0.792548  | -2.147495 | -0.012199 |
| 6  | 0.433791  | -1.920903 | 1.346877  |
| 8  | -2.089453 | 0.541800  | 0.438044  |
| 6  | -2.801162 | 0.189281  | 1.616903  |
| 8  | 0.287191  | 1.765384  | 0.390422  |
| 6  | 0.101871  | 2.924583  | -0.413442 |
| 8  | 2.227795  | 0.093305  | -0.373687 |
| 6  | 3.308055  | 0.239437  | 0.540321  |
| 1  | -0.422232 | -1.044380 | -3.152272 |
| 1  | -0.109441 | 0.182317  | -1.894663 |
| 1  | -1.686184 | 0.131474  | -2.720483 |
| 1  | -0.652982 | -1.802541 | -0.909370 |
| 1  | -2.290145 | -0.605020 | 2.171984  |
| 1  | -3.817360 | -0.137753 | 1.376338  |
| 1  | -2.856860 | 1.078500  | 2.246556  |
| 1  | -1.982968 | -0.242299 | -0.149138 |
| 1  | 0.141682  | -0.874960 | 1.508992  |
| 1  | 1.261276  | -2.168397 | 2.019783  |
| 1  | -0.416635 | -2.564447 | 1.582003  |
| 1  | 1.423118  | -1.431490 | -0.259170 |
| 1  | -0.537145 | 3.653596  | 0.094456  |
| 1  | -0.343126 | 2.671228  | -1.382313 |
| 1  | 1.082850  | 3.372342  | -0.582325 |
| 1  | -0.584927 | 1.315130  | 0.496166  |

|   |          |           |           |
|---|----------|-----------|-----------|
| 1 | 2.974017 | 0.112315  | 1.576552  |
| 1 | 3.779879 | 1.221769  | 0.435597  |
| 1 | 4.045640 | -0.531431 | 0.310879  |
| 1 | 1.523167 | 0.741339  | -0.129254 |

-----

Cartesian coordinates of the methanol hexamer

Cartesian coordinates of : MeOH\_4\_12\_13.log

-----

Atomic number (AN) and Cartesian coordinates

| AN | X         | Y         | Z         |
|----|-----------|-----------|-----------|
| 8  | 1.824953  | 2.275735  | -0.222490 |
| 1  | 1.278128  | 1.817129  | 0.439177  |
| 8  | -0.046677 | 0.711576  | 1.106031  |
| 1  | 0.245895  | -0.141729 | 0.714543  |
| 8  | 0.629860  | -1.399213 | -0.411442 |
| 1  | 1.542355  | -1.742564 | -0.276053 |
| 6  | 0.941341  | 2.962629  | -1.093663 |
| 1  | 0.362336  | 3.728236  | -0.563520 |
| 1  | 1.545278  | 3.451563  | -1.860480 |
| 1  | 0.241089  | 2.275609  | -1.585778 |
| 6  | -0.578289 | 0.486169  | 2.411345  |
| 1  | -1.371804 | -0.266849 | 2.373743  |
| 1  | 0.206807  | 0.161973  | 3.100965  |
| 1  | -0.992643 | 1.432081  | 2.763071  |
| 6  | 0.582472  | -0.709236 | -1.663630 |
| 1  | 1.351589  | 0.070604  | -1.702032 |
| 1  | 0.717959  | -1.406501 | -2.494643 |
| 1  | -0.403373 | -0.242230 | -1.738985 |
| 8  | 3.247077  | -1.813183 | -0.094408 |
| 1  | 3.630965  | -2.585734 | 0.337622  |
| 6  | 3.612329  | -0.630192 | 0.623135  |
| 1  | 3.225223  | -0.655775 | 1.646523  |
| 1  | 4.698261  | -0.509694 | 0.643061  |
| 1  | 3.166489  | 0.213239  | 0.091609  |
| 6  | -3.347278 | 1.055303  | 0.196322  |
| 1  | -4.220505 | 1.060772  | -0.460249 |
| 1  | -3.296376 | 0.086980  | 0.708224  |
| 1  | -3.469897 | 1.850427  | 0.942505  |
| 8  | -2.199677 | 1.270308  | -0.610829 |
| 1  | -1.415726 | 1.149469  | -0.044528 |
| 6  | -2.722233 | -2.101207 | -0.758952 |
| 1  | -3.763157 | -2.287882 | -0.485324 |
| 1  | -2.672505 | -1.161708 | -1.323312 |
| 1  | -2.378364 | -2.924798 | -1.395926 |
| 8  | -1.971209 | -2.021019 | 0.443056  |
| 1  | -1.032685 | -1.947045 | 0.203101  |

-----

Cartesian coordinates of : MeOH\_4r\_11\_12.log

-----

Atomic number (AN) and Cartesian coordinates

| AN | X         | Y         | Z         |
|----|-----------|-----------|-----------|
| 1  | -4.213358 | -1.545196 | -0.543689 |
| 6  | -3.665288 | -0.698809 | -0.118675 |
| 1  | -4.339852 | 0.156151  | -0.046325 |
| 1  | -3.320876 | -0.963442 | 0.887528  |
| 8  | -2.579866 | -0.322097 | -0.957727 |
| 1  | -1.937366 | -1.066784 | -1.020305 |
| 1  | 1.331214  | -1.778520 | -1.966458 |

|   |           |           |           |
|---|-----------|-----------|-----------|
| 6 | 0.403818  | -1.235837 | -1.756100 |
| 1 | 0.629934  | -0.383028 | -1.099987 |
| 1 | -0.008806 | -0.861595 | -2.694890 |
| 8 | -0.566247 | -2.094673 | -1.163919 |
| 1 | -0.223003 | -2.324945 | -0.272566 |
| 1 | -2.068975 | 1.416283  | 1.791736  |
| 6 | -1.997507 | 2.254334  | 1.087799  |
| 1 | -3.005307 | 2.612647  | 0.854981  |
| 1 | -1.436623 | 3.061882  | 1.561540  |
| 8 | -1.304271 | 1.880440  | -0.096785 |
| 1 | -1.756709 | 1.095604  | -0.487837 |
| 1 | -0.596861 | -0.329884 | 1.084023  |
| 6 | -0.303804 | -1.062297 | 1.851021  |
| 1 | 0.191511  | -0.534115 | 2.672356  |
| 1 | -1.202233 | -1.548893 | 2.235713  |
| 8 | 0.539826  | -2.069085 | 1.303255  |
| 1 | 1.402418  | -1.633347 | 1.117605  |
| 1 | 4.475765  | 0.099402  | 0.083004  |
| 6 | 3.649905  | -0.601152 | -0.080039 |
| 1 | 3.264539  | -0.466254 | -1.097511 |
| 1 | 4.027697  | -1.620294 | 0.018670  |
| 8 | 2.627535  | -0.416940 | 0.889989  |
| 1 | 2.163434  | 0.429497  | 0.691497  |
| 1 | 1.460071  | 3.398387  | -1.234363 |
| 6 | 1.853372  | 2.389085  | -1.077669 |
| 1 | 1.589655  | 1.765312  | -1.940340 |
| 1 | 2.941109  | 2.443595  | -1.002156 |
| 8 | 1.359944  | 1.834095  | 0.135420  |
| 1 | 0.374271  | 1.811675  | 0.087896  |

-----

Cartesian coordinates of : MeOH\_5\_11b.log

-----

Atomic number (AN) and Cartesian coordinates

| AN | X         | Y         | Z         |
|----|-----------|-----------|-----------|
| 8  | 1.167720  | 1.175547  | -1.366425 |
| 1  | 0.184010  | 1.256314  | -1.306498 |
| 8  | -1.466295 | 1.493785  | -1.001775 |
| 1  | -1.811290 | 0.760982  | -0.434659 |
| 8  | -2.313006 | -0.472451 | 0.599806  |
| 1  | -1.586371 | -1.139252 | 0.582697  |
| 6  | 1.746420  | 2.346286  | -0.795143 |
| 1  | 1.402731  | 2.497274  | 0.234854  |
| 1  | 2.829399  | 2.208779  | -0.784423 |
| 1  | 1.506430  | 3.229765  | -1.394594 |
| 6  | -1.785018 | 2.733153  | -0.379348 |
| 1  | -2.868941 | 2.861348  | -0.297186 |
| 1  | -1.339801 | 2.804675  | 0.620157  |
| 1  | -1.382526 | 3.533317  | -1.003272 |
| 6  | -3.517859 | -1.094794 | 0.165890  |
| 1  | -3.457164 | -1.390754 | -0.887623 |
| 1  | -3.743371 | -1.975604 | 0.774737  |
| 1  | -4.324982 | -0.369790 | 0.282067  |
| 8  | -0.333220 | -2.274173 | 0.256475  |
| 1  | 0.534712  | -1.816348 | 0.305286  |
| 6  | -0.518111 | -2.665680 | -1.101435 |
| 1  | -1.445266 | -3.238698 | -1.158878 |
| 1  | -0.597673 | -1.791166 | -1.759155 |
| 1  | 0.307678  | -3.297471 | -1.442845 |
| 8  | 1.708623  | 0.669907  | 2.294466  |
| 1  | 2.107334  | 0.073712  | 1.638213  |
| 6  | 0.306409  | 0.584656  | 2.112555  |
| 1  | 0.022375  | 0.759840  | 1.064843  |
| 1  | -0.087511 | -0.392872 | 2.418903  |

|   |           |           |           |
|---|-----------|-----------|-----------|
| 1 | -0.160722 | 1.355365  | 2.729785  |
| 6 | 3.093766  | -1.578013 | -0.606966 |
| 1 | 3.360366  | -2.420819 | 0.032249  |
| 1 | 2.817356  | -1.954960 | -1.596841 |
| 1 | 3.959362  | -0.915228 | -0.702016 |
| 8 | 2.000800  | -0.898479 | 0.003537  |
| 1 | 1.703242  | -0.145155 | -0.577803 |

-----

Cartesian coordinates of : MeOH\_6b.log

-----

Atomic number (AN) and Cartesian coordinates

| AN | X         | Y         | Z         |
|----|-----------|-----------|-----------|
| 8  | -2.550321 | 1.658598  | -0.671517 |
| 1  | -2.475981 | 0.740483  | -0.996116 |
| 8  | -2.127178 | -1.044938 | -1.024579 |
| 1  | -1.380235 | -1.165091 | -0.398324 |
| 8  | -0.205323 | -1.381973 | 0.850902  |
| 1  | 0.770084  | -1.363121 | 0.705465  |
| 6  | -2.188309 | 1.628883  | 0.697447  |
| 1  | -1.254700 | 1.072150  | 0.855036  |
| 1  | -2.037773 | 2.657964  | 1.031762  |
| 1  | -2.971381 | 1.171568  | 1.317096  |
| 6  | -3.251957 | -1.738483 | -0.499899 |
| 1  | -3.009062 | -2.785851 | -0.292419 |
| 1  | -3.618770 | -1.268768 | 0.421317  |
| 1  | -4.044518 | -1.703441 | -1.249242 |
| 6  | -0.511639 | -1.290495 | 2.233231  |
| 1  | -0.090988 | -2.134083 | 2.789862  |
| 1  | -0.139471 | -0.354340 | 2.667112  |
| 1  | -1.599127 | -1.309740 | 2.333747  |
| 8  | 2.414772  | -1.214863 | 0.294165  |
| 1  | 2.421000  | -0.481134 | -0.362765 |
| 6  | 2.910936  | -2.395907 | -0.327858 |
| 1  | 2.848003  | -3.204347 | 0.402074  |
| 1  | 2.313448  | -2.664295 | -1.206262 |
| 1  | 3.955415  | -2.269995 | -0.628124 |
| 8  | 2.000143  | 0.717449  | -1.538237 |
| 1  | 2.009230  | 1.596483  | -1.113895 |
| 6  | 0.641742  | 0.426622  | -1.863908 |
| 1  | -0.026637 | 0.699464  | -1.039395 |
| 1  | 0.331717  | 0.962025  | -2.766589 |
| 1  | 0.562859  | -0.648536 | -2.042609 |
| 8  | 1.384828  | 2.746446  | 0.163966  |
| 1  | 1.730126  | 3.631054  | 0.332326  |
| 6  | 1.418615  | 1.982542  | 1.367813  |
| 1  | 2.434086  | 1.912043  | 1.768824  |
| 1  | 0.749959  | 2.406510  | 2.122945  |
| 1  | 1.071019  | 0.978265  | 1.109628  |

-----

Cartesian coordinates of : MeOH\_6r\_DUUDUU.log

-----

Atomic number (AN) and Cartesian coordinates

| AN | X         | Y         | Z         |
|----|-----------|-----------|-----------|
| 6  | 2.745036  | -2.532362 | -0.645489 |
| 8  | 2.100269  | -1.437257 | -0.008208 |
| 8  | -0.433334 | -2.090256 | 0.468973  |
| 6  | -0.890025 | -1.635110 | 1.737861  |
| 8  | 2.357778  | 1.001608  | -1.030088 |
| 6  | 3.631094  | 1.460340  | -0.592575 |
| 8  | -2.357782 | -1.001609 | -1.030091 |

|   |           |           |           |
|---|-----------|-----------|-----------|
| 6 | -3.631095 | -1.460344 | -0.592571 |
| 8 | -2.100268 | 1.437257  | -0.008211 |
| 6 | -2.745029 | 2.532367  | -0.645491 |
| 8 | 0.433332  | 2.090256  | 0.468975  |
| 6 | 0.890023  | 1.635111  | 1.737864  |
| 1 | 2.266906  | -2.777361 | -1.599922 |
| 1 | 2.737243  | -3.418103 | -0.002312 |
| 1 | 3.780977  | -2.244531 | -0.834243 |
| 1 | 1.151958  | -1.670262 | 0.151303  |
| 1 | 4.437229  | 0.956075  | -1.135453 |
| 1 | 3.766833  | 1.293544  | 0.482482  |
| 1 | 3.688637  | 2.531795  | -0.792742 |
| 1 | 2.255825  | 0.061075  | -0.740439 |
| 1 | 1.701947  | 2.268473  | 2.110864  |
| 1 | 1.241658  | 0.597915  | 1.680672  |
| 1 | 0.053208  | 1.686546  | 2.438061  |
| 1 | 1.090654  | 1.787378  | -0.202463 |
| 1 | -1.701953 | -2.268468 | 2.110859  |
| 1 | -1.241655 | -0.597912 | 1.680668  |
| 1 | -0.053212 | -1.686548 | 2.438060  |
| 1 | -1.090654 | -1.787377 | -0.202464 |
| 1 | -2.266898 | 2.777363  | -1.599924 |
| 1 | -2.737231 | 3.418107  | -0.002313 |
| 1 | -3.780972 | 2.244541  | -0.834244 |
| 1 | -1.151956 | 1.670259  | 0.151303  |
| 1 | -4.437234 | -0.956081 | -1.135444 |
| 1 | -3.766828 | -1.293549 | 0.482487  |
| 1 | -3.688637 | -2.531799 | -0.792739 |
| 1 | -2.255833 | -0.061074 | -0.740447 |

-----

Cartesian coordinates of : MeOH\_6r\_UUUNDD.log

-----

Atomic number (AN) and Cartesian coordinates

| AN | X         | Y         | Z         |
|----|-----------|-----------|-----------|
| 6  | 0.273516  | -0.927683 | 1.908852  |
| 8  | 1.070058  | -1.707871 | 1.022761  |
| 8  | -0.708694 | -2.048410 | -0.935983 |
| 6  | -1.410133 | -3.269882 | -0.730703 |
| 8  | 3.053039  | 0.061190  | 0.606666  |
| 6  | 4.001017  | -0.223458 | -0.416130 |
| 8  | 1.369858  | 1.867973  | -0.464045 |
| 6  | 0.892676  | 1.088010  | -1.556545 |
| 8  | -2.275852 | 0.097647  | -0.498435 |
| 6  | -3.325399 | -0.403926 | 0.321790  |
| 8  | -1.060152 | 2.181112  | 0.650405  |
| 6  | -1.683637 | 3.355578  | 0.143250  |
| 1  | 0.003590  | 0.037550  | 1.461193  |
| 1  | 0.796962  | -0.748852 | 2.853115  |
| 1  | -0.641324 | -1.487872 | 2.114790  |
| 1  | 1.882445  | -1.183951 | 0.830300  |
| 1  | -1.755955 | -3.362822 | 0.305313  |
| 1  | -0.779011 | -4.129499 | -0.976162 |
| 1  | -2.277695 | -3.269719 | -1.393117 |
| 1  | 0.039292  | -1.997060 | -0.293560 |
| 1  | -2.931999 | -0.874375 | 1.230077  |
| 1  | -3.935995 | -1.130356 | -0.223986 |
| 1  | -3.955502 | 0.439979  | 0.608775  |
| 1  | -1.677133 | -0.653793 | -0.724086 |
| 1  | 4.597486  | 0.662377  | -0.655071 |
| 1  | 3.509078  | -0.581411 | -1.328195 |
| 1  | 4.664906  | -1.005437 | -0.044704 |
| 1  | 2.499493  | 0.822634  | 0.315460  |
| 1  | -2.746197 | 3.379226  | 0.405654  |

|   |           |          |           |
|---|-----------|----------|-----------|
| 1 | -1.583220 | 3.422184 | -0.946462 |
| 1 | -1.189782 | 4.217035 | 0.595495  |
| 1 | -1.508703 | 1.396610 | 0.249168  |
| 1 | -0.019415 | 1.521935 | -1.979719 |
| 1 | 0.681982  | 0.055224 | -1.247558 |
| 1 | 1.667013  | 1.075002 | -2.325911 |
| 1 | 0.585394  | 2.070443 | 0.095168  |

-----

Cartesian coordinates of : MeOH\_6r\_UUUDUD.log

-----

Atomic number (AN) and Cartesian coordinates

| AN | X         | Y         | Z         |
|----|-----------|-----------|-----------|
| 6  | -0.479722 | -1.446313 | 1.462730  |
| 8  | -1.023673 | -2.209500 | 0.391013  |
| 8  | -2.597968 | -0.340341 | -0.712881 |
| 6  | -3.889424 | -0.339137 | -0.113916 |
| 8  | -1.192819 | 1.833620  | -0.025353 |
| 6  | -1.753717 | 2.206827  | 1.228091  |
| 8  | 1.476102  | 1.815492  | 0.011326  |
| 6  | 1.870772  | 2.535409  | -1.150469 |
| 8  | 2.736960  | -0.518038 | 0.295644  |
| 6  | 3.124276  | -0.676500 | 1.652756  |
| 8  | 1.130632  | -2.061706 | -1.204019 |
| 6  | 0.683600  | -0.987417 | -2.024100 |
| 1  | -0.048127 | -0.502034 | 1.099481  |
| 1  | 0.295297  | -2.009607 | 1.992658  |
| 1  | -1.291191 | -1.221165 | 2.157695  |
| 1  | -0.280962 | -2.379143 | -0.232348 |
| 1  | -3.822726 | -0.350559 | 0.980036  |
| 1  | -4.475386 | -1.201203 | -0.446807 |
| 1  | -4.398400 | 0.574503  | -0.426290 |
| 1  | -2.090284 | -1.119697 | -0.384673 |
| 1  | -1.733903 | 1.372215  | 1.938319  |
| 1  | -2.785877 | 2.551471  | 1.107713  |
| 1  | -1.154251 | 3.025045  | 1.631355  |
| 1  | -1.688418 | 1.048186  | -0.361350 |
| 1  | 1.516140  | -0.544992 | -2.581150 |
| 1  | 0.201723  | -0.202184 | -1.423803 |
| 1  | -0.046538 | -1.385486 | -2.730770 |
| 1  | 1.797537  | -1.678873 | -0.589400 |
| 1  | 1.562186  | 3.583441  | -1.083674 |
| 1  | 1.443282  | 2.093079  | -2.057338 |
| 1  | 2.959428  | 2.491185  | -1.216550 |
| 1  | 0.489493  | 1.779130  | 0.030427  |
| 1  | 2.296529  | -0.449686 | 2.334264  |
| 1  | 3.972220  | -0.027815 | 1.896663  |
| 1  | 3.423355  | -1.716151 | 1.798546  |
| 1  | 2.290290  | 0.356902  | 0.190593  |

-----

Cartesian coordinates of : MeOH\_6r\_UUUUDD.log

-----

Atomic number (AN) and Cartesian coordinates

| AN | X         | Y         | Z         |
|----|-----------|-----------|-----------|
| 6  | -3.077555 | -0.025900 | -1.449351 |
| 8  | -2.351989 | -0.020166 | -0.225506 |
| 8  | -0.823484 | 2.186973  | -0.358940 |
| 6  | -1.506407 | 3.308980  | 0.190977  |
| 8  | 1.138537  | 1.468079  | 1.300666  |
| 6  | 0.406558  | 0.438860  | 1.959018  |
| 8  | -1.084693 | -2.329675 | 0.264777  |



|   |           |           |           |
|---|-----------|-----------|-----------|
| 6 | -1.401653 | -2.797958 | 1.567314  |
| 8 | 3.061707  | -0.119777 | 0.283796  |
| 6 | 3.859895  | 0.385854  | -0.780586 |
| 8 | 1.277074  | -1.752933 | -0.910565 |
| 6 | 0.657997  | -0.829839 | -1.801318 |
| 1 | -2.405593 | 0.063962  | -2.310155 |
| 1 | -3.804441 | 0.792327  | -1.476245 |
| 1 | -3.612267 | -0.975164 | -1.516585 |
| 1 | -1.773785 | 0.779685  | -0.219338 |
| 1 | -2.468224 | -3.029856 | 1.652765  |
| 1 | -1.135487 | -2.062222 | 2.335774  |
| 1 | -0.828425 | -3.709649 | 1.742876  |
| 1 | -1.575455 | -1.490181 | 0.092747  |
| 1 | 0.350947  | 0.087211  | -1.279492 |
| 1 | -0.221057 | -1.277882 | -2.276221 |
| 1 | 1.383434  | -0.570862 | -2.574806 |
| 1 | 0.558664  | -2.112872 | -0.346193 |
| 1 | -0.920996 | 4.224337  | 0.062601  |
| 1 | -1.717865 | 3.163232  | 1.256232  |
| 1 | -2.451406 | 3.416365  | -0.344494 |
| 1 | 0.000587  | 2.031672  | 0.160775  |
| 1 | 3.255664  | 0.953903  | -1.497748 |
| 1 | 4.371236  | -0.425965 | -1.307075 |
| 1 | 4.608554  | 1.050863  | -0.347528 |
| 1 | 2.469140  | -0.819131 | -0.076648 |
| 1 | 0.950166  | 0.064823  | 2.832422  |
| 1 | 0.202220  | -0.397118 | 1.277356  |
| 1 | -0.545759 | 0.861307  | 2.289534  |
| 1 | 1.939908  | 1.041225  | 0.919293  |

-----

Cartesian coordinates of : MeOH\_6r\_UUUUUU.log

-----

Atomic number (AN) and Cartesian coordinates

| AN | X         | Y         | Z         |
|----|-----------|-----------|-----------|
| 6  | 3.047554  | 1.222264  | 0.830336  |
| 8  | 2.359418  | 1.125967  | -0.411320 |
| 8  | -0.020114 | 2.262340  | -0.078673 |
| 6  | 0.069296  | 3.589404  | -0.580639 |
| 8  | -2.371247 | 1.072864  | -0.440549 |
| 6  | -3.001846 | 1.322234  | 0.810075  |
| 8  | 2.284865  | -1.502197 | -0.878177 |
| 6  | 3.338778  | -2.204409 | -0.230312 |
| 8  | 0.014670  | -2.145865 | 0.352217  |
| 6  | -0.040874 | -1.169757 | 1.385973  |
| 8  | -2.278096 | -1.564521 | -0.882689 |
| 6  | -3.405379 | -2.105907 | -0.204396 |
| 1  | 4.090371  | 0.905498  | 0.726196  |
| 1  | 2.562637  | 0.614487  | 1.603277  |
| 1  | 3.027311  | 2.267923  | 1.143422  |
| 1  | 2.328901  | 0.172090  | -0.669467 |
| 1  | 0.282025  | 3.596682  | -1.654810 |
| 1  | 0.847579  | 4.153681  | -0.056346 |
| 1  | -0.892682 | 4.076446  | -0.408703 |
| 1  | 0.838497  | 1.799241  | -0.243505 |
| 1  | -3.047801 | 2.396207  | 1.017251  |
| 1  | -2.472651 | 0.823994  | 1.631144  |
| 1  | -4.019752 | 0.931149  | 0.756295  |
| 1  | -1.467970 | 1.471745  | -0.403509 |
| 1  | 3.297256  | -3.273308 | -0.461743 |
| 1  | 3.299212  | -2.071714 | 0.857292  |
| 1  | 4.283745  | -1.801224 | -0.599139 |
| 1  | 1.421710  | -1.815551 | -0.511941 |
| 1  | -4.339001 | -1.723328 | -0.629293 |

|   |           |           |           |
|---|-----------|-----------|-----------|
| 1 | -3.378356 | -1.873286 | 0.867004  |
| 1 | -3.380722 | -3.189648 | -0.328805 |
| 1 | -2.305213 | -0.580171 | -0.796183 |
| 1 | -0.935603 | -1.303253 | 2.003798  |
| 1 | -0.036914 | -0.150104 | 0.977471  |
| 1 | 0.840448  | -1.300670 | 2.017798  |
| 1 | -0.804171 | -2.038578 | -0.190196 |

-----

Cartesian coordinates of : MeOH\_N6\_12.log

-----

Atomic number (AN) and Cartesian coordinates

| AN | X         | Y         | Z         |
|----|-----------|-----------|-----------|
| 6  | -3.256476 | -0.223613 | -1.258939 |
| 8  | -2.001169 | -0.246427 | -0.585950 |
| 8  | -0.826414 | 2.079946  | -0.544242 |
| 6  | -1.426198 | 2.856543  | 0.488141  |
| 8  | 1.713507  | 1.642985  | 0.044464  |
| 6  | 2.585938  | 2.508573  | -0.673746 |
| 8  | 2.264271  | -0.874812 | -0.667289 |
| 6  | 2.951324  | -1.665065 | 0.296124  |
| 8  | -0.094941 | -2.115303 | -1.077221 |
| 6  | -0.340567 | -3.155454 | -0.135266 |
| 8  | -1.470444 | -0.648087 | 2.123422  |
| 6  | -0.133944 | -0.196898 | 1.985302  |
| 1  | -3.916613 | 0.532370  | -0.822464 |
| 1  | -3.124835 | -0.017350 | -2.325358 |
| 1  | -3.715603 | -1.206197 | -1.140662 |
| 1  | -1.565108 | 0.650408  | -0.650838 |
| 1  | 3.625773  | 2.350679  | -0.371341 |
| 1  | 2.497796  | 2.355629  | -1.754602 |
| 1  | 2.302251  | 3.535710  | -0.437486 |
| 1  | 1.935138  | 0.707186  | -0.186448 |
| 1  | 2.323365  | -1.860610 | 1.173452  |
| 1  | 3.270147  | -2.618594 | -0.136566 |
| 1  | 3.834739  | -1.108579 | 0.613749  |
| 1  | 1.421365  | -1.330180 | -0.901453 |
| 1  | -0.425115 | -2.758952 | 0.883325  |
| 1  | -1.258345 | -3.697578 | -0.384689 |
| 1  | 0.501065  | -3.849034 | -0.181550 |
| 1  | -0.816399 | -1.451949 | -1.000638 |
| 1  | 0.304061  | -0.521535 | 1.031365  |
| 1  | -0.059410 | 0.896462  | 2.039200  |
| 1  | 0.454619  | -0.624364 | 2.800911  |
| 1  | -1.899418 | -0.537965 | 1.256580  |
| 1  | -1.812778 | 2.215642  | 1.290551  |
| 1  | -0.704808 | 3.561332  | 0.911903  |
| 1  | -2.256380 | 3.417367  | 0.054683  |
| 1  | 0.125561  | 1.909172  | -0.316799 |

-----

Cartesian coordinates of : MeOH\_N6\_180.log

-----

Atomic number (AN) and Cartesian coordinates

| AN | X         | Y         | Z         |
|----|-----------|-----------|-----------|
| 6  | -1.022345 | 2.662943  | 0.669434  |
| 8  | -0.608404 | 2.344027  | -0.656115 |
| 8  | -1.557123 | -0.066365 | -1.036043 |
| 6  | -2.841882 | -0.134864 | -1.647299 |
| 8  | 1.968958  | 1.799748  | -0.280562 |
| 6  | 2.574518  | 1.094893  | -1.362912 |
| 8  | 1.595645  | -0.079000 | 1.600964  |

|   |           |           |           |
|---|-----------|-----------|-----------|
| 6 | 2.366722  | -1.236421 | 1.286408  |
| 8 | -0.973838 | -0.877802 | 1.482559  |
| 6 | -1.959212 | -0.586293 | 2.465282  |
| 8 | 0.555260  | -1.797022 | -1.624319 |
| 6 | 0.134217  | -2.991401 | -0.984376 |
| 1 | -0.618494 | 1.942735  | 1.392212  |
| 1 | -0.698865 | 3.670273  | 0.947783  |
| 1 | -2.113240 | 2.619537  | 0.699698  |
| 1 | 0.374164  | 2.221388  | -0.631419 |
| 1 | -0.111066 | -2.817205 | 0.070466  |
| 1 | -0.737772 | -3.432146 | -1.483173 |
| 1 | 0.960108  | -3.704313 | -1.038831 |
| 1 | -0.167503 | -1.148475 | -1.543848 |
| 1 | 3.620272  | 0.861582  | -1.135768 |
| 1 | 2.036030  | 0.165389  | -1.579531 |
| 1 | 2.543698  | 1.743163  | -2.240622 |
| 1 | 1.869083  | 1.166426  | 0.470768  |
| 1 | -2.276914 | 0.461021  | 2.417383  |
| 1 | -2.834430 | -1.232256 | 2.343650  |
| 1 | -1.514889 | -0.774459 | 3.443733  |
| 1 | -1.308747 | -0.638044 | 0.590914  |
| 1 | 2.194651  | -2.029613 | 2.021453  |
| 1 | 2.124772  | -1.607174 | 0.284042  |
| 1 | 3.419843  | -0.950008 | 1.320661  |
| 1 | 0.644627  | -0.334983 | 1.607770  |
| 1 | -3.579356 | 0.430643  | -1.069052 |
| 1 | -2.807391 | 0.252522  | -2.669507 |
| 1 | -3.139509 | -1.184178 | -1.674602 |
| 1 | -1.235173 | 0.876345  | -0.995268 |

-----

Cartesian coordinates of : MeOH\_N6\_6.log

-----

Atomic number (AN) and Cartesian coordinates

| AN | X         | Y         | Z         |
|----|-----------|-----------|-----------|
| 6  | -2.612650 | -2.331007 | 0.542610  |
| 8  | -2.354464 | -1.292780 | -0.393244 |
| 8  | 0.008338  | -1.298815 | -1.661596 |
| 6  | 0.037248  | 0.096124  | -1.942684 |
| 8  | -2.407680 | 1.258053  | 0.458632  |
| 6  | -2.883107 | 2.116145  | -0.568914 |
| 8  | -0.008333 | 1.298815  | 1.661593  |
| 6  | -0.037255 | -0.096124 | 1.942679  |
| 8  | 2.354471  | 1.292778  | 0.393240  |
| 6  | 2.612660  | 2.331011  | -0.542607 |
| 8  | 2.407675  | -1.258058 | -0.458631 |
| 6  | 2.883098  | -2.116144 | 0.568921  |
| 1  | -2.857970 | -3.266824 | 0.030632  |
| 1  | -1.753759 | -2.498607 | 1.202060  |
| 1  | -3.466896 | -2.026376 | 1.149797  |
| 1  | -1.494733 | -1.457315 | -0.844392 |
| 1  | -2.209680 | 2.119816  | -1.433639 |
| 1  | -3.883894 | 1.818181  | -0.897158 |
| 1  | -2.934046 | 3.126824  | -0.160762 |
| 1  | -2.433925 | 0.323087  | 0.145312  |
| 1  | 1.753774  | 2.498610  | -1.202063 |
| 1  | 2.857971  | 3.266827  | -0.030622 |
| 1  | 3.466913  | 2.026387  | -1.149788 |
| 1  | 1.494747  | 1.457323  | 0.844393  |
| 1  | -0.963639 | -0.372933 | 2.457160  |
| 1  | 0.050524  | -0.690255 | 1.021312  |
| 1  | 0.810011  | -0.323569 | 2.593025  |
| 1  | -0.844018 | 1.499828  | 1.183065  |
| 1  | 3.883893  | -1.818192 | 0.897152  |

|   |           |           |           |
|---|-----------|-----------|-----------|
| 1 | 2.209679  | -2.119796 | 1.433652  |
| 1 | 2.934018  | -3.126828 | 0.160778  |
| 1 | 2.433911  | -0.323092 | -0.145310 |
| 1 | -0.050522 | 0.690258  | -1.021319 |
| 1 | 0.963623  | 0.372937  | -2.457179 |
| 1 | -0.810027 | 0.323563  | -2.593020 |
| 1 | 0.844024  | -1.499823 | -1.183066 |

-----

Cartesian coordinates of : MeOH\_N6\_6r.log

-----  
Atomic number (AN) and Cartesian coordinates

| AN | X         | Y         | Z         |
|----|-----------|-----------|-----------|
| 6  | -2.857042 | -2.360289 | -0.847360 |
| 8  | -1.995351 | -1.746765 | 0.102538  |
| 8  | 0.513063  | -2.597627 | -0.098546 |
| 6  | 0.616010  | -3.653824 | 0.847493  |
| 8  | 2.504898  | -0.852075 | 0.102169  |
| 6  | 3.467543  | -1.292610 | -0.846751 |
| 8  | 1.995350  | 1.746763  | -0.102541 |
| 6  | 2.857045  | 2.360288  | 0.847354  |
| 8  | -0.513063 | 2.597628  | 0.098546  |
| 6  | -0.616018 | 3.653824  | -0.847493 |
| 8  | -2.504897 | 0.852074  | -0.102166 |
| 6  | -3.467538 | 1.292612  | 0.846757  |
| 1  | -2.651514 | -2.003314 | -1.862330 |
| 1  | -3.907095 | -2.166150 | -0.605170 |
| 1  | -2.682270 | -3.437423 | -0.810465 |
| 1  | -2.129620 | -0.767078 | 0.057664  |
| 1  | -0.071945 | -4.468871 | 0.599832  |
| 1  | 0.404461  | -3.302463 | 1.863189  |
| 1  | 1.638353  | -4.035559 | 0.812565  |
| 1  | -0.404333 | -2.228402 | -0.055075 |
| 1  | 3.056334  | -1.293857 | -1.862014 |
| 1  | 3.824095  | -2.298907 | -0.603517 |
| 1  | 4.313130  | -0.602853 | -0.809927 |
| 1  | 1.724691  | -1.459814 | 0.059646  |
| 1  | -3.824086 | 2.298911  | 0.603527  |
| 1  | -3.056327 | 1.293854  | 1.862019  |
| 1  | -4.313128 | 0.602859  | 0.809934  |
| 1  | -1.724687 | 1.459810  | -0.059642 |
| 1  | 3.907096  | 2.166144  | 0.605162  |
| 1  | 2.651518  | 2.003316  | 1.862326  |
| 1  | 2.682277  | 3.437421  | 0.810456  |
| 1  | 2.129616  | 0.767076  | -0.057666 |
| 1  | -0.404471 | 3.302464  | -1.863189 |
| 1  | 0.071934  | 4.468875  | -0.599835 |
| 1  | -1.638363 | 4.035554  | -0.812562 |
| 1  | 0.404334  | 2.228408  | 0.055072  |

-----

Cartesian coordinates of : MeOH\_N6\_81.log

-----  
Atomic number (AN) and Cartesian coordinates

| AN | X         | Y         | Z         |
|----|-----------|-----------|-----------|
| 6  | -2.125960 | -1.168436 | -2.200690 |
| 8  | -1.282117 | -0.820070 | -1.105265 |
| 8  | 0.413022  | 1.139083  | -1.633547 |
| 6  | 0.084758  | 2.493225  | -1.331977 |
| 8  | 2.400135  | -0.039099 | -0.129611 |
| 6  | 3.682143  | -0.388441 | -0.643470 |

|   |           |           |           |
|---|-----------|-----------|-----------|
| 8 | 0.765051  | -2.141487 | 0.108725  |
| 6 | 0.260072  | -2.603151 | 1.358316  |
| 8 | -2.670983 | -0.234486 | 1.246073  |
| 6 | -3.142231 | 1.055623  | 0.898486  |
| 8 | 1.402678  | 1.782507  | 1.721673  |
| 6 | 0.262813  | 0.957184  | 1.888269  |
| 1 | -2.812571 | -0.349509 | -2.435869 |
| 1 | -1.533352 | -1.412574 | -3.087021 |
| 1 | -2.704653 | -2.044673 | -1.905860 |
| 1 | -0.722014 | -0.036312 | -1.345179 |
| 1 | -0.532281 | -1.944687 | 1.730846  |
| 1 | -0.130469 | -3.621139 | 1.265005  |
| 1 | 1.085337  | -2.603156 | 2.072695  |
| 1 | 0.007653  | -1.856328 | -0.442807 |
| 1 | -0.103915 | 0.570320  | 0.926117  |
| 1 | 0.470627  | 0.104700  | 2.546818  |
| 1 | -0.530316 | 1.559090  | 2.337329  |
| 1 | 2.033487  | 1.273315  | 1.185497  |
| 1 | 0.059508  | 2.662586  | -0.250741 |
| 1 | 0.808785  | 3.175833  | -1.786866 |
| 1 | -0.901675 | 2.689713  | -1.755511 |
| 1 | 1.232820  | 0.872055  | -1.167457 |
| 1 | -2.323588 | 1.713452  | 0.577053  |
| 1 | -3.890828 | 1.012923  | 0.097675  |
| 1 | -3.606022 | 1.492647  | 1.785229  |
| 1 | -2.185664 | -0.572549 | 0.471735  |
| 1 | 4.249048  | -0.971339 | 0.088212  |
| 1 | 3.588537  | -0.962076 | -1.570629 |
| 1 | 4.218005  | 0.538423  | -0.851388 |
| 1 | 1.871675  | -0.858336 | 0.037129  |

-----

Cartesian coordinates of the methanol heptamer

Cartesian coordinates of : MeOH\_4r\_11\_22.log

-----

Atomic number (AN) and Cartesian coordinates

| AN | X         | Y         | Z         |
|----|-----------|-----------|-----------|
| 1  | 1.155697  | 3.537284  | 1.666833  |
| 6  | 0.124734  | 3.192788  | 1.541173  |
| 1  | -0.315705 | 2.996574  | 2.523360  |
| 1  | -0.452890 | 3.971088  | 1.040299  |
| 8  | 0.079192  | 2.025666  | 0.721714  |
| 1  | 0.517553  | 1.267524  | 1.195330  |
| 1  | -0.566780 | -0.470236 | -2.423806 |
| 6  | 0.174575  | -0.760787 | -1.671715 |
| 1  | 1.172013  | -0.678646 | -2.108091 |
| 1  | 0.109338  | -0.067541 | -0.820921 |
| 8  | -0.020543 | -2.108817 | -1.257122 |
| 1  | -0.941307 | -2.158588 | -0.923944 |
| 1  | -4.421555 | -1.650353 | 0.414346  |
| 6  | -3.406944 | -2.051537 | 0.504769  |
| 1  | -3.028002 | -1.836453 | 1.511105  |
| 1  | -3.443150 | -3.133497 | 0.368639  |
| 8  | -2.555334 | -1.517197 | -0.498188 |
| 1  | -2.496090 | -0.540182 | -0.386780 |
| 1  | -1.395467 | 1.827319  | -1.954045 |
| 6  | -2.367273 | 1.859831  | -1.448119 |
| 1  | -2.656903 | 2.904469  | -1.296141 |
| 1  | -3.111177 | 1.373765  | -2.082190 |
| 8  | -2.324755 | 1.159337  | -0.209239 |
| 1  | -1.517793 | 1.455455  | 0.263954  |

|   |           |           |           |
|---|-----------|-----------|-----------|
| 6 | 2.777230  | 1.400185  | -0.856213 |
| 1 | 3.550030  | 1.149340  | -1.586132 |
| 1 | 3.215763  | 2.051259  | -0.089813 |
| 1 | 2.443130  | 0.470482  | -0.373742 |
| 8 | 1.718957  | 2.040369  | -1.547085 |
| 1 | 1.016390  | 2.194266  | -0.891285 |
| 6 | -0.314855 | -0.773380 | 2.191460  |
| 1 | -0.188700 | -1.625137 | 2.866261  |
| 1 | -0.748765 | -1.122389 | 1.245577  |
| 1 | -0.997990 | -0.054435 | 2.649981  |
| 8 | 0.929009  | -0.111439 | 1.969877  |
| 1 | 1.501299  | -0.741478 | 1.475268  |
| 6 | 3.221052  | -2.311348 | -0.119934 |
| 1 | 3.262074  | -1.747832 | -1.059170 |
| 1 | 3.395896  | -3.370906 | -0.331368 |
| 1 | 4.009736  | -1.947536 | 0.540760  |
| 8 | 1.978662  | -2.124509 | 0.545084  |
| 1 | 1.240736  | -2.295404 | -0.083143 |

-----

Cartesian coordinates of : MeOH\_5r\_11\_12.log

-----

Atomic number (AN) and Cartesian coordinates

| AN | X         | Y         | Z         |
|----|-----------|-----------|-----------|
| 1  | -1.673693 | -3.616298 | 0.210544  |
| 6  | -2.040814 | -2.742112 | -0.336676 |
| 1  | -1.439451 | -2.613958 | -1.244362 |
| 1  | -3.081031 | -2.910593 | -0.620856 |
| 8  | -2.002727 | -1.580787 | 0.478717  |
| 1  | -1.074824 | -1.400386 | 0.724717  |
| 1  | -2.348633 | 1.772710  | 1.145068  |
| 6  | -3.185119 | 1.646391  | 0.450007  |
| 1  | -4.066536 | 1.308733  | 1.004987  |
| 1  | -3.414158 | 2.604408  | -0.020690 |
| 8  | -2.854410 | 0.724682  | -0.583419 |
| 1  | -2.579751 | -0.131899 | -0.172168 |
| 1  | 0.317530  | 0.912482  | 3.501295  |
| 6  | 0.426962  | 0.079874  | 2.796828  |
| 1  | 1.492607  | -0.090241 | 2.604003  |
| 1  | 0.005459  | -0.819771 | 3.250289  |
| 8  | -0.286019 | 0.320689  | 1.592777  |
| 1  | 0.122725  | 1.070707  | 1.123473  |
| 1  | -0.765900 | -0.603407 | -2.724958 |
| 6  | -0.114888 | 0.028161  | -2.110840 |
| 1  | 0.035575  | -0.451556 | -1.133280 |
| 1  | 0.850303  | 0.127838  | -2.612415 |
| 8  | -0.666516 | 1.333744  | -1.960955 |
| 1  | -1.534011 | 1.218531  | -1.495811 |
| 1  | 0.316733  | 4.083832  | 0.344566  |
| 6  | 1.240276  | 3.539200  | 0.125665  |
| 1  | 1.725036  | 3.983341  | -0.748644 |
| 1  | 1.910627  | 3.618732  | 0.982530  |
| 8  | 0.975464  | 2.157288  | -0.087083 |
| 1  | 0.355740  | 2.021703  | -0.851707 |
| 6  | 1.341519  | -3.000181 | -0.453431 |
| 1  | 0.777669  | -3.934892 | -0.480296 |
| 1  | 1.265503  | -2.519913 | -1.438861 |
| 1  | 2.394343  | -3.233803 | -0.256700 |
| 8  | 0.789232  | -2.186755 | 0.567572  |
| 1  | 1.314959  | -1.362792 | 0.599576  |
| 6  | 3.558963  | -0.294396 | -0.693196 |
| 1  | 4.103923  | -1.191636 | -0.394687 |
| 1  | 3.116921  | -0.464333 | -1.681894 |
| 1  | 4.264929  | 0.539926  | -0.756002 |

|   |          |           |          |
|---|----------|-----------|----------|
| 8 | 2.561983 | -0.050523 | 0.289842 |
| 1 | 2.109967 | 0.794208  | 0.092534 |

-----  
Cartesian coordinates of : MeOH\_6\_13.log

-----  
Atomic number (AN) and Cartesian coordinates

| AN | X         | Y         | Z         |
|----|-----------|-----------|-----------|
| 8  | -3.156334 | 0.477391  | -2.090061 |
| 1  | -3.012977 | 0.887048  | -1.212848 |
| 8  | -2.826623 | 1.672631  | 0.357997  |
| 1  | -2.280608 | 1.203745  | 1.029956  |
| 8  | -1.130806 | 0.534334  | 2.104211  |
| 1  | -0.394520 | 0.145277  | 1.586178  |
| 6  | -4.422810 | -0.153357 | -2.070601 |
| 1  | -5.233688 | 0.564812  | -1.896996 |
| 1  | -4.579436 | -0.622583 | -3.044308 |
| 1  | -4.479281 | -0.933265 | -1.299590 |
| 6  | -2.284919 | 2.976357  | 0.189433  |
| 1  | -2.370261 | 3.560799  | 1.111309  |
| 1  | -1.231277 | 2.935252  | -0.111152 |
| 1  | -2.854699 | 3.474615  | -0.597241 |
| 6  | -1.563999 | -0.393913 | 3.093808  |
| 1  | -1.776124 | -1.373289 | 2.651861  |
| 1  | -0.807732 | -0.507340 | 3.877024  |
| 1  | -2.476207 | 0.005023  | 3.540523  |
| 8  | 0.587293  | -0.552472 | 0.314929  |
| 1  | 1.572744  | -0.656251 | 0.362666  |
| 6  | 0.264876  | 0.088541  | -0.918925 |
| 1  | -0.784233 | 0.393321  | -0.875076 |
| 1  | 0.890493  | 0.973546  | -1.072423 |
| 1  | 0.394544  | -0.599550 | -1.761447 |
| 8  | 3.201297  | -0.823162 | 0.154565  |
| 1  | 3.742360  | -0.009214 | 0.230493  |
| 6  | 3.491717  | -1.427829 | -1.102576 |
| 1  | 3.384085  | -0.709026 | -1.922187 |
| 1  | 4.506067  | -1.838813 | -1.111980 |
| 1  | 2.780300  | -2.242768 | -1.249736 |
| 8  | 4.895256  | 1.303075  | 0.071879  |
| 1  | 4.610041  | 2.097550  | -0.395274 |
| 6  | 6.167672  | 0.887079  | -0.425470 |
| 1  | 6.122017  | 0.667703  | -1.496196 |
| 1  | 6.927243  | 1.650177  | -0.237641 |
| 1  | 6.434482  | -0.021511 | 0.115591  |
| 6  | -2.301175 | -2.066459 | -0.055748 |
| 1  | -3.164607 | -2.722543 | 0.076155  |
| 1  | -2.524987 | -1.098705 | 0.418114  |
| 1  | -2.149879 | -1.892441 | -1.128395 |
| 8  | -1.184953 | -2.700553 | 0.544541  |
| 1  | -0.433075 | -2.084017 | 0.488610  |

-----  
Cartesian coordinates of : MeOH\_7.log

-----  
Atomic number (AN) and Cartesian coordinates

| AN | X        | Y         | Z         |
|----|----------|-----------|-----------|
| 8  | 1.439788 | -2.264116 | 0.805971  |
| 1  | 2.066521 | -1.526204 | 0.604642  |
| 8  | 3.138182 | -0.342155 | 0.076888  |
| 1  | 2.703624 | 0.497222  | -0.215367 |
| 8  | 2.011805 | 1.906302  | -0.807123 |
| 1  | 1.096282 | 1.971360  | -0.439787 |

|   |           |           |           |
|---|-----------|-----------|-----------|
| 6 | 1.294754  | -2.410232 | 2.211424  |
| 1 | 0.831632  | -1.525636 | 2.664005  |
| 1 | 0.650805  | -3.272537 | 2.391594  |
| 1 | 2.263867  | -2.588112 | 2.687840  |
| 6 | 3.873340  | -0.858824 | -1.027597 |
| 1 | 3.214918  | -1.075623 | -1.876631 |
| 1 | 4.647056  | -0.152651 | -1.344996 |
| 1 | 4.351564  | -1.785614 | -0.705978 |
| 6 | 2.762486  | 3.022859  | -0.340424 |
| 1 | 2.367591  | 3.957444  | -0.750020 |
| 1 | 2.753534  | 3.077070  | 0.753928  |
| 1 | 3.792159  | 2.895711  | -0.679717 |
| 8 | -0.264281 | 1.917077  | 0.534190  |
| 1 | -1.189363 | 1.869355  | 0.187881  |
| 6 | -0.088868 | 0.854021  | 1.461508  |
| 1 | 0.981774  | 0.765748  | 1.672674  |
| 1 | -0.614998 | 1.057121  | 2.400521  |
| 1 | -0.441865 | -0.100375 | 1.049872  |
| 8 | -2.806030 | 1.555161  | -0.164758 |
| 1 | -2.916803 | 0.571169  | -0.182035 |
| 6 | -3.645157 | 2.078322  | 0.858723  |
| 1 | -4.698595 | 1.873750  | 0.642681  |
| 1 | -3.391923 | 1.654584  | 1.837320  |
| 1 | -3.496405 | 3.158901  | 0.892942  |
| 8 | -3.049311 | -1.089788 | -0.110529 |
| 1 | -2.149917 | -1.470189 | -0.266261 |
| 6 | -3.931320 | -1.603859 | -1.102258 |
| 1 | -3.563609 | -1.388971 | -2.111885 |
| 1 | -4.058156 | -2.684878 | -0.989218 |
| 1 | -4.900182 | -1.119146 | -0.969190 |
| 8 | -0.636000 | -1.911849 | -0.818619 |
| 1 | 0.069636  | -2.161210 | -0.174262 |
| 6 | -0.112979 | -0.887698 | -1.656626 |
| 1 | 0.598609  | -0.256117 | -1.111231 |
| 1 | 0.387852  | -1.315668 | -2.530917 |
| 1 | -0.942366 | -0.259082 | -1.995061 |

-----

Cartesian coordinates of : MeOH\_7r\_1.log

-----

Atomic number (AN) and Cartesian coordinates

| AN | X         | Y         | Z         |
|----|-----------|-----------|-----------|
| 6  | -3.819908 | -1.966552 | -0.268199 |
| 8  | -2.592416 | -1.415201 | -0.728208 |
| 8  | -2.787057 | 1.146640  | -0.040293 |
| 6  | -3.653539 | 1.847156  | -0.923868 |
| 8  | -0.732965 | 2.816841  | 0.163036  |
| 6  | -0.861783 | 3.691791  | 1.275633  |
| 8  | 1.875330  | 2.319120  | 0.107120  |
| 6  | 2.524693  | 3.198937  | -0.801221 |
| 8  | 3.091552  | -0.006434 | -0.322382 |
| 6  | 4.245635  | -0.107929 | 0.501974  |
| 8  | 1.970482  | -2.396296 | -0.028055 |
| 6  | 2.412159  | -3.342869 | -0.991623 |
| 8  | -0.624032 | -2.874764 | 0.309042  |
| 6  | -1.017576 | -2.967692 | 1.672115  |
| 1  | -4.665590 | -1.581183 | -0.847463 |
| 1  | -3.982570 | -1.747251 | 0.793049  |
| 1  | -3.770760 | -3.049646 | -0.400426 |
| 1  | -2.578927 | -0.454242 | -0.495009 |
| 1  | -1.913797 | -3.588251 | 1.779849  |
| 1  | -1.214323 | -1.977397 | 2.097657  |
| 1  | -0.200332 | -3.433065 | 2.226727  |
| 1  | -1.288878 | -2.314190 | -0.160308 |



|   |           |           |           |
|---|-----------|-----------|-----------|
| 1 | 1.892087  | -3.213777 | -1.946881 |
| 1 | 2.257183  | -4.366098 | -0.634401 |
| 1 | 3.481059  | -3.184815 | -1.149519 |
| 1 | 0.996857  | -2.508110 | 0.100372  |
| 1 | -0.257850 | 4.594503  | 1.135531  |
| 1 | -0.561419 | 3.200794  | 2.207430  |
| 1 | -1.911857 | 3.981471  | 1.352862  |
| 1 | 0.211616  | 2.533562  | 0.099451  |
| 1 | 4.905796  | -0.909375 | 0.154293  |
| 1 | 3.975165  | -0.294537 | 1.546820  |
| 1 | 4.784491  | 0.839892  | 0.441341  |
| 1 | 2.588170  | -0.854076 | -0.249805 |
| 1 | 2.402057  | 2.865602  | -1.837229 |
| 1 | 3.592998  | 3.278625  | -0.574127 |
| 1 | 2.069722  | 4.185803  | -0.692872 |
| 1 | 2.245086  | 1.411372  | -0.021147 |
| 1 | -3.202324 | 1.966534  | -1.914779 |
| 1 | -3.904443 | 2.834891  | -0.523468 |
| 1 | -4.572656 | 1.265997  | -1.022259 |
| 1 | -1.961804 | 1.680661  | 0.063371  |

-----

Cartesian coordinates of : MeOH\_7r\_2.log

-----

Atomic number (AN) and Cartesian coordinates

| AN | X         | Y         | Z         |
|----|-----------|-----------|-----------|
| 6  | 1.294767  | -2.410201 | 2.211458  |
| 8  | 1.439777  | -2.264116 | 0.806000  |
| 8  | 3.138147  | -0.342158 | 0.076847  |
| 6  | 3.873334  | -0.858838 | -1.027613 |
| 8  | 2.011806  | 1.906311  | -0.807157 |
| 6  | 2.762502  | 3.022827  | -0.340384 |
| 8  | -0.264271 | 1.917083  | 0.534155  |
| 6  | -0.088848 | 0.854045  | 1.461491  |
| 8  | -2.806018 | 1.555191  | -0.164791 |
| 6  | -3.645115 | 2.078347  | 0.858718  |
| 8  | -3.049325 | -1.089757 | -0.110520 |
| 6  | -3.931351 | -1.603865 | -1.102214 |
| 8  | -0.636026 | -1.911864 | -0.818581 |
| 6  | -0.112978 | -0.887774 | -1.656646 |
| 1  | 2.066504  | -1.526207 | 0.604642  |
| 1  | 2.703597  | 0.497219  | -0.215426 |
| 1  | 1.096280  | 1.971364  | -0.439824 |
| 1  | 0.831738  | -1.525558 | 2.664042  |
| 1  | 0.650742  | -3.272444 | 2.391656  |
| 1  | 2.263875  | -2.588166 | 2.687852  |
| 1  | 3.214942  | -1.075606 | -1.876677 |
| 1  | 4.647088  | -0.152687 | -1.344971 |
| 1  | 4.351516  | -1.785647 | -0.705984 |
| 1  | 2.367598  | 3.957448  | -0.749890 |
| 1  | 2.753577  | 3.076946  | 0.753974  |
| 1  | 3.792166  | 2.895706  | -0.679713 |
| 1  | -1.189355 | 1.869355  | 0.187847  |
| 1  | 0.981801  | 0.765745  | 1.672613  |
| 1  | -0.614930 | 1.057185  | 2.400524  |
| 1  | -0.441891 | -0.100351 | 1.049895  |
| 1  | -2.916797 | 0.571199  | -0.182068 |
| 1  | -4.698558 | 1.873765  | 0.642712  |
| 1  | -3.391844 | 1.654614  | 1.837308  |
| 1  | -3.496371 | 3.158928  | 0.892930  |
| 1  | -2.149934 | -1.470167 | -0.266247 |
| 1  | -3.563644 | -1.389042 | -2.111856 |
| 1  | -4.058208 | -2.684876 | -0.989113 |
| 1  | -4.900203 | -1.119126 | -0.969167 |

|   |           |           |           |
|---|-----------|-----------|-----------|
| 1 | 0.069612  | -2.161219 | -0.174226 |
| 1 | 0.598503  | -0.256079 | -1.111243 |
| 1 | 0.387984  | -1.315810 | -2.530831 |
| 1 | -0.942373 | -0.259263 | -1.995248 |

-----

Cartesian coordinates of : MeOH\_7r\_UUDDUD.log

-----

Atomic number (AN) and Cartesian coordinates

| AN | X | Y | Z |
|----|---|---|---|
|----|---|---|---|

|   |           |           |           |
|---|-----------|-----------|-----------|
| 6 | -1.228565 | 3.741105  | -0.238583 |
| 8 | -1.045693 | 2.395053  | -0.664280 |
| 8 | 1.578303  | 1.984508  | -0.553236 |
| 6 | 2.236891  | 1.820548  | -1.803303 |
| 8 | 2.524069  | -0.036005 | 0.887520  |
| 6 | 2.708462  | 0.017744  | 2.294783  |
| 8 | 1.632866  | -2.434488 | 0.168689  |
| 6 | 2.435101  | -2.881687 | -0.919925 |
| 8 | -0.744100 | -2.047175 | -0.957738 |
| 6 | -0.567507 | -0.761976 | -1.544568 |
| 8 | -2.909156 | -1.591847 | 0.523212  |
| 6 | -4.117929 | -1.542023 | -0.225266 |
| 8 | -1.925699 | 0.774695  | 1.261008  |
| 6 | -0.684467 | 0.428433  | 1.863099  |
| 1 | -0.743183 | 4.438211  | -0.928883 |
| 1 | -0.827241 | 3.897416  | 0.769426  |
| 1 | -2.300535 | 3.944818  | -0.227099 |
| 1 | -0.074112 | 2.207921  | -0.666229 |
| 1 | 0.011929  | 1.275186  | 1.839076  |
| 1 | -0.214321 | -0.423903 | 1.351600  |
| 1 | -0.872922 | 0.154861  | 2.903162  |
| 1 | -1.721461 | 1.342347  | 0.477781  |
| 1 | -4.047684 | -0.825680 | -1.051704 |
| 1 | -4.962819 | -1.268619 | 0.414299  |
| 1 | -4.294591 | -2.536965 | -0.636676 |
| 1 | -2.679663 | -0.683714 | 0.836029  |
| 1 | 3.546471  | -0.615228 | 2.603992  |
| 1 | 1.806611  | -0.301539 | 2.829882  |
| 1 | 2.929172  | 1.052257  | 2.564887  |
| 1 | 2.185587  | -0.931167 | 0.634372  |
| 1 | 0.094544  | -0.135184 | -0.930003 |
| 1 | -1.526013 | -0.245547 | -1.658235 |
| 1 | -0.115513 | -0.889348 | -2.531059 |
| 1 | -1.540679 | -2.006506 | -0.374317 |
| 1 | 2.346903  | -2.208535 | -1.780692 |
| 1 | 2.150490  | -3.893274 | -1.224611 |
| 1 | 3.473928  | -2.891869 | -0.585647 |
| 1 | 0.698756  | -2.381116 | -0.149555 |
| 1 | 2.066524  | 0.818944  | -2.215161 |
| 1 | 3.313866  | 1.986727  | -1.701538 |
| 1 | 1.828611  | 2.559664  | -2.495176 |
| 1 | 1.890702  | 1.269048  | 0.053264  |

-----

Cartesian coordinates of : MeOH\_7r\_UUUUDD.log

-----

Atomic number (AN) and Cartesian coordinates

| AN | X | Y | Z |
|----|---|---|---|
|----|---|---|---|

|   |           |           |           |
|---|-----------|-----------|-----------|
| 6 | -2.516228 | -3.006864 | 1.102640  |
| 8 | -1.722948 | -1.830441 | 1.212931  |
| 8 | 0.297706  | -1.959773 | -0.499004 |
| 6 | 0.055644  | -0.925127 | -1.444692 |

|   |           |           |           |
|---|-----------|-----------|-----------|
| 8 | 2.892026  | -1.583084 | -0.065621 |
| 6 | 3.608280  | -1.976392 | -1.230852 |
| 8 | -2.989361 | 0.292943  | 0.189159  |
| 6 | -3.933927 | -0.285304 | -0.704317 |
| 8 | 3.095812  | 1.066019  | -0.003718 |
| 6 | 4.024316  | 1.607750  | 0.928132  |
| 8 | 0.698293  | 2.016697  | 0.646958  |
| 6 | 0.166674  | 1.094559  | 1.592978  |
| 8 | -1.440708 | 2.144613  | -0.949360 |
| 6 | -2.123488 | 3.368906  | -0.699936 |
| 1 | -2.014634 | -3.861603 | 1.566994  |
| 1 | -2.733570 | -3.244327 | 0.055073  |
| 1 | -3.456753 | -2.824513 | 1.625940  |
| 1 | -0.906961 | -1.944046 | 0.666952  |
| 1 | -4.714260 | -0.822217 | -0.155311 |
| 1 | -3.450732 | -0.975232 | -1.406348 |
| 1 | -4.396579 | 0.524512  | -1.271512 |
| 1 | -2.510465 | -0.440574 | 0.647017  |
| 1 | -2.248253 | 3.542479  | 0.375213  |
| 1 | -3.107606 | 3.372567  | -1.179258 |
| 1 | -1.523431 | 4.177232  | -1.120895 |
| 1 | -1.986236 | 1.414689  | -0.566138 |
| 1 | 4.676995  | -1.765921 | -1.122164 |
| 1 | 3.231722  | -1.461657 | -2.122394 |
| 1 | 3.472322  | -3.051548 | -1.359956 |
| 1 | 2.978632  | -0.601342 | 0.026626  |
| 1 | 0.097215  | 0.083772  | 1.171459  |
| 1 | -0.827934 | 1.409362  | 1.927829  |
| 1 | 0.838217  | 1.070816  | 2.453295  |
| 1 | 0.013151  | 2.132439  | -0.054169 |
| 1 | 3.693975  | 1.446863  | 1.960197  |
| 1 | 4.166240  | 2.679705  | 0.759281  |
| 1 | 4.978604  | 1.098849  | 0.780650  |
| 1 | 2.210176  | 1.474614  | 0.157118  |
| 1 | 0.366440  | -1.229419 | -2.449562 |
| 1 | 0.582747  | -0.002448 | -1.170811 |
| 1 | -1.018570 | -0.718057 | -1.455278 |
| 1 | 1.255369  | -1.925963 | -0.254323 |

-----

Cartesian coordinates of the methanol octamer

Cartesian coordinates of : MeOH\_5\_21\_14.log

-----

Atomic number (AN) and Cartesian coordinates

| AN | X         | Y         | Z         |
|----|-----------|-----------|-----------|
| 8  | -3.599722 | -0.081136 | -1.181102 |
| 1  | -3.154493 | -0.828035 | -0.717507 |
| 8  | 2.520482  | -2.111330 | -0.072674 |
| 1  | 3.122637  | -1.369978 | 0.171259  |
| 8  | 3.867563  | 0.151458  | 0.518296  |
| 1  | 3.135472  | 0.521344  | 1.060273  |
| 6  | -4.920608 | 0.041802  | -0.667165 |
| 1  | -4.914515 | 0.213243  | 0.415885  |
| 1  | -5.389231 | 0.897905  | -1.155192 |
| 1  | -5.511407 | -0.854275 | -0.882843 |
| 6  | 2.958614  | -2.691205 | -1.297265 |
| 1  | 2.967932  | -1.953635 | -2.107994 |
| 1  | 3.959423  | -3.120496 | -1.190334 |
| 1  | 2.258741  | -3.488198 | -1.553942 |
| 6  | 3.872132  | 0.862368  | -0.718794 |
| 1  | 2.856452  | 0.949819  | -1.125059 |

|   |           |           |           |
|---|-----------|-----------|-----------|
| 1 | 4.293866  | 1.864755  | -0.590694 |
| 1 | 4.498260  | 0.307227  | -1.420148 |
| 8 | 1.508054  | 0.891977  | 1.629521  |
| 1 | 1.005577  | 0.905346  | 0.788988  |
| 6 | 1.061222  | -0.166071 | 2.467063  |
| 1 | 1.562880  | -0.050943 | 3.429424  |
| 1 | -0.021064 | -0.117385 | 2.626336  |
| 1 | 1.314817  | -1.147791 | 2.050113  |
| 8 | 0.666988  | 2.033767  | -0.755697 |
| 1 | -0.308557 | 2.008473  | -0.839045 |
| 6 | 1.037616  | 3.336247  | -0.329587 |
| 1 | 0.797773  | 4.088791  | -1.088604 |
| 1 | 0.545034  | 3.608650  | 0.611733  |
| 1 | 2.117449  | 3.334968  | -0.165246 |
| 8 | 0.119047  | -0.934340 | -0.294168 |
| 1 | 0.968502  | -1.420328 | -0.161377 |
| 6 | -0.043496 | -0.716260 | -1.693773 |
| 1 | 0.794503  | -0.139759 | -2.096029 |
| 1 | -0.137843 | -1.665836 | -2.232853 |
| 1 | -0.960727 | -0.137986 | -1.834556 |
| 8 | -2.287433 | -1.993747 | 0.213960  |
| 1 | -1.348826 | -1.697783 | 0.164730  |
| 6 | -2.686223 | -2.112474 | 1.573646  |
| 1 | -2.026287 | -2.794915 | 2.118231  |
| 1 | -2.689995 | -1.139134 | 2.078947  |
| 1 | -3.699707 | -2.517141 | 1.586710  |
| 6 | -1.915836 | 1.527494  | 0.945652  |
| 1 | -1.279202 | 2.227988  | 1.492195  |
| 1 | -2.890654 | 1.476505  | 1.443432  |
| 1 | -1.443502 | 0.537378  | 0.962442  |
| 8 | -2.043165 | 2.000403  | -0.391090 |
| 1 | -2.618338 | 1.353392  | -0.854315 |

-----

Cartesian coordinates of : MeOH\_5\_21\_15.log

-----

Atomic number (AN) and Cartesian coordinates

| AN | X         | Y         | Z         |
|----|-----------|-----------|-----------|
| 8  | -3.599724 | -0.081134 | -1.181101 |
| 1  | -3.154493 | -0.828033 | -0.717508 |
| 8  | 2.520481  | -2.111329 | -0.072675 |
| 1  | 3.122636  | -1.369978 | 0.171259  |
| 8  | 3.867562  | 0.151458  | 0.518297  |
| 1  | 3.135472  | 0.521344  | 1.060275  |
| 6  | -4.920610 | 0.041801  | -0.667162 |
| 1  | -4.914516 | 0.213243  | 0.415887  |
| 1  | -5.389235 | 0.897903  | -1.155190 |
| 1  | -5.511407 | -0.854278 | -0.882839 |
| 6  | 2.958616  | -2.691203 | -1.297266 |
| 1  | 2.967935  | -1.953632 | -2.107994 |
| 1  | 3.959424  | -3.120495 | -1.190334 |
| 1  | 2.258742  | -3.488195 | -1.553945 |
| 6  | 3.872134  | 0.862368  | -0.718792 |
| 1  | 2.856454  | 0.949821  | -1.125057 |
| 1  | 4.293868  | 1.864755  | -0.590692 |
| 1  | 4.498261  | 0.307227  | -1.420146 |
| 8  | 1.508052  | 0.891975  | 1.629522  |
| 1  | 1.005576  | 0.905343  | 0.788989  |
| 6  | 1.061221  | -0.166075 | 2.467063  |
| 1  | 1.562877  | -0.050947 | 3.429424  |
| 1  | -0.021066 | -0.117390 | 2.626335  |
| 1  | 1.314816  | -1.147794 | 2.050112  |
| 8  | 0.666990  | 2.033767  | -0.755697 |
| 1  | -0.308555 | 2.008473  | -0.839047 |

|   |           |           |           |
|---|-----------|-----------|-----------|
| 6 | 1.037618  | 3.336246  | -0.329586 |
| 1 | 0.797774  | 4.088792  | -1.088601 |
| 1 | 0.545035  | 3.608648  | 0.611735  |
| 1 | 2.117450  | 3.334967  | -0.165243 |
| 8 | 0.119046  | -0.934340 | -0.294170 |
| 1 | 0.968501  | -1.420328 | -0.161379 |
| 6 | -0.043497 | -0.716258 | -1.693774 |
| 1 | 0.794503  | -0.139755 | -2.096030 |
| 1 | -0.137842 | -1.665833 | -2.232856 |
| 1 | -0.960728 | -0.137984 | -1.834557 |
| 8 | -2.287434 | -1.993745 | 0.213958  |
| 1 | -1.348826 | -1.697782 | 0.164727  |
| 6 | -2.686222 | -2.112475 | 1.573645  |
| 1 | -2.026284 | -2.794915 | 2.118228  |
| 1 | -2.689994 | -1.139135 | 2.078946  |
| 1 | -3.699704 | -2.517143 | 1.586710  |
| 6 | -1.915835 | 1.527494  | 0.945651  |
| 1 | -1.279199 | 2.227986  | 1.492195  |
| 1 | -2.890653 | 1.476507  | 1.443432  |
| 1 | -1.443503 | 0.537376  | 0.962442  |
| 8 | -2.043165 | 2.000403  | -0.391090 |
| 1 | -2.618340 | 1.353393  | -0.854315 |

-----

Cartesian coordinates of : MeOH\_5r\_21\_12.log

-----

Atomic number (AN) and Cartesian coordinates

| AN | X         | Y         | Z         |
|----|-----------|-----------|-----------|
| 1  | 1.750022  | 4.617843  | -0.583485 |
| 6  | 2.065025  | 3.569734  | -0.553757 |
| 1  | 1.883018  | 3.115588  | -1.534638 |
| 1  | 3.135093  | 3.530134  | -0.343008 |
| 8  | 1.391532  | 2.866142  | 0.479953  |
| 1  | 0.426602  | 2.810439  | 0.268649  |
| 1  | 0.100147  | 0.274565  | 0.548303  |
| 6  | 0.680817  | -0.089804 | 1.406761  |
| 1  | 0.151425  | 0.182220  | 2.326057  |
| 1  | 0.743258  | -1.180566 | 1.343491  |
| 8  | 2.003408  | 0.434150  | 1.395610  |
| 1  | 1.941873  | 1.372553  | 1.099860  |
| 1  | -1.980417 | 1.298404  | 1.438187  |
| 6  | -1.896600 | 2.375881  | 1.253966  |
| 1  | -2.897346 | 2.821339  | 1.241369  |
| 1  | -1.319364 | 2.831463  | 2.062652  |
| 8  | -1.216571 | 2.636137  | 0.026693  |
| 1  | -1.500321 | 1.948125  | -0.618530 |
| 1  | -1.149023 | -3.779525 | -1.373597 |
| 6  | -1.661701 | -2.835708 | -1.579095 |
| 1  | -1.648782 | -2.641046 | -2.656121 |
| 1  | -2.697640 | -2.913338 | -1.242956 |
| 8  | -1.054777 | -1.763703 | -0.861278 |
| 1  | -0.099288 | -1.666377 | -1.134590 |
| 1  | -3.684602 | 0.081691  | -0.068783 |
| 6  | -3.586739 | 0.502469  | -1.075404 |
| 1  | -4.122437 | -0.129566 | -1.791176 |
| 1  | -4.026928 | 1.501745  | -1.091419 |
| 8  | -2.214153 | 0.630669  | -1.442778 |
| 1  | -1.770800 | -0.230216 | -1.280356 |
| 6  | -1.994068 | -2.141401 | 2.565707  |
| 1  | -0.943105 | -2.185125 | 2.878794  |
| 1  | -2.295649 | -3.132722 | 2.206966  |
| 1  | -2.602059 | -1.888592 | 3.436502  |
| 8  | -2.209824 | -1.141047 | 1.585376  |
| 1  | -1.733861 | -1.395659 | 0.773624  |

|   |          |           |           |
|---|----------|-----------|-----------|
| 6 | 1.323893 | 0.112399  | -2.098822 |
| 1 | 2.096125 | 0.329644  | -2.843117 |
| 1 | 1.479311 | 0.752429  | -1.221234 |
| 1 | 0.344278 | 0.336173  | -2.529019 |
| 8 | 1.340629 | -1.266439 | -1.739040 |
| 1 | 2.133123 | -1.419480 | -1.167997 |
| 6 | 3.749224 | -2.413214 | 0.700103  |
| 1 | 2.862837 | -2.840686 | 1.182817  |
| 1 | 4.488850 | -2.164123 | 1.467186  |
| 1 | 4.176874 | -3.158043 | 0.027356  |
| 8 | 3.417145 | -1.268400 | -0.075980 |
| 1 | 3.020572 | -0.581516 | 0.513005  |

-----

Cartesian coordinates of : MeOH\_6\_12\_15.log

-----

Atomic number (AN) and Cartesian coordinates

| AN | X         | Y         | Z         |
|----|-----------|-----------|-----------|
| 8  | -1.758765 | 1.041713  | 1.592009  |
| 1  | -1.788425 | 1.041717  | 0.617211  |
| 8  | 2.764904  | -2.102798 | -1.777982 |
| 1  | 2.718096  | -2.025636 | -0.810631 |
| 8  | 2.236113  | -1.096996 | 0.768838  |
| 1  | 2.475467  | -0.142976 | 0.645263  |
| 6  | -0.435019 | 1.316879  | 2.020678  |
| 1  | -0.116281 | 2.316982  | 1.702201  |
| 1  | -0.425944 | 1.275808  | 3.111528  |
| 1  | 0.274080  | 0.577888  | 1.626461  |
| 6  | 2.666743  | -0.784502 | -2.292480 |
| 1  | 1.768463  | -0.268713 | -1.926250 |
| 1  | 3.542161  | -0.178968 | -2.028227 |
| 1  | 2.605275  | -0.857267 | -3.380389 |
| 6  | 2.436681  | -1.490936 | 2.122503  |
| 1  | 3.485203  | -1.373665 | 2.411400  |
| 1  | 1.806654  | -0.905310 | 2.800767  |
| 1  | 2.160581  | -2.542986 | 2.204510  |
| 8  | 2.565307  | 1.480569  | 0.227948  |
| 1  | 1.695205  | 1.635413  | -0.206542 |
| 6  | 2.768099  | 2.412498  | 1.283700  |
| 1  | 3.837906  | 2.447768  | 1.495786  |
| 1  | 2.432191  | 3.412371  | 0.992921  |
| 1  | 2.239135  | 2.108626  | 2.194900  |
| 8  | 0.214716  | 1.638199  | -1.093620 |
| 1  | -0.318357 | 0.825021  | -0.997000 |
| 6  | -0.611231 | 2.774288  | -1.297336 |
| 1  | -1.224674 | 2.656861  | -2.195421 |
| 1  | -1.269906 | 2.956395  | -0.438612 |
| 1  | 0.047903  | 3.634978  | -1.422696 |
| 8  | -2.510243 | 0.528192  | -1.056216 |
| 1  | -2.651168 | -0.340709 | -0.631788 |
| 6  | -3.775143 | 1.164972  | -1.196402 |
| 1  | -4.415617 | 0.622112  | -1.898510 |
| 1  | -4.286620 | 1.245667  | -0.230537 |
| 1  | -3.595833 | 2.168775  | -1.585994 |
| 8  | -3.066398 | -1.351530 | 0.908600  |
| 1  | -2.535043 | -0.725110 | 1.432918  |
| 6  | -2.648448 | -2.677574 | 1.200423  |
| 1  | -1.564745 | -2.783103 | 1.084401  |
| 1  | -2.934505 | -2.966538 | 2.217409  |
| 1  | -3.148176 | -3.342564 | 0.493572  |
| 6  | -0.523243 | -1.996579 | -1.299272 |
| 1  | -1.602185 | -2.089382 | -1.450990 |
| 1  | -0.051766 | -1.725726 | -2.250954 |
| 1  | -0.132229 | -2.967055 | -0.976754 |

```
8 -0.305621 -0.998142 -0.311080
1 0.582405 -1.118602 0.081193
```

-----  
Cartesian coordinates of : MeOH\_6\_13\_14.log

-----  
Atomic number (AN) and Cartesian coordinates

| AN | X         | Y         | Z         |
|----|-----------|-----------|-----------|
| 8  | -0.695263 | -0.491188 | 1.558615  |
| 1  | -1.486174 | -0.190483 | 1.077259  |
| 8  | -3.681465 | -1.085649 | -1.465805 |
| 1  | -3.299025 | -0.274205 | -1.084612 |
| 8  | -2.617102 | 0.924909  | 0.099604  |
| 1  | -1.842151 | 1.481926  | -0.171701 |
| 6  | -0.422393 | 0.463850  | 2.567835  |
| 1  | -1.162848 | 0.427265  | 3.376306  |
| 1  | 0.561194  | 0.233304  | 2.988027  |
| 1  | -0.389749 | 1.485035  | 2.164739  |
| 6  | -4.035408 | -1.922179 | -0.379566 |
| 1  | -3.188727 | -2.087864 | 0.299792  |
| 1  | -4.869259 | -1.507258 | 0.200703  |
| 1  | -4.344129 | -2.887529 | -0.786197 |
| 6  | -3.551724 | 1.715715  | 0.826775  |
| 1  | -3.090844 | 2.140661  | 1.724768  |
| 1  | -3.948008 | 2.525153  | 0.206341  |
| 1  | -4.374096 | 1.064025  | 1.127085  |
| 8  | -0.397265 | 2.232048  | -0.445186 |
| 1  | 0.338439  | 1.762834  | 0.009934  |
| 6  | -0.007907 | 2.441500  | -1.799158 |
| 1  | -0.791185 | 3.026148  | -2.283347 |
| 1  | 0.933495  | 2.998121  | -1.848510 |
| 1  | 0.108368  | 1.491156  | -2.333102 |
| 8  | 1.842702  | 1.066375  | 0.480049  |
| 1  | 1.822836  | 0.150155  | 0.862004  |
| 6  | 2.726169  | 1.882768  | 1.244829  |
| 1  | 2.339012  | 2.030564  | 2.258165  |
| 1  | 3.721534  | 1.430990  | 1.297025  |
| 1  | 2.797453  | 2.850357  | 0.745641  |
| 8  | 2.090914  | -1.490110 | 1.116779  |
| 1  | 1.498640  | -1.799972 | 0.397544  |
| 6  | 1.815935  | -2.196272 | 2.319907  |
| 1  | 0.757028  | -2.120915 | 2.583719  |
| 1  | 2.096174  | -3.250226 | 2.222624  |
| 1  | 2.419765  | -1.745721 | 3.110191  |
| 8  | 0.836373  | -1.903424 | -1.272580 |
| 1  | 1.442337  | -1.261090 | -1.697450 |
| 6  | -0.500828 | -1.461713 | -1.475929 |
| 1  | -0.644964 | -0.440735 | -1.100411 |
| 1  | -0.773877 | -1.501427 | -2.535592 |
| 1  | -1.160931 | -2.128160 | -0.918865 |
| 6  | 3.900196  | -0.472233 | -1.710795 |
| 1  | 4.140640  | -1.161260 | -2.521741 |
| 1  | 4.660990  | 0.314098  | -1.676754 |
| 1  | 3.900172  | -1.019677 | -0.761134 |
| 8  | 2.611343  | 0.076285  | -1.982138 |
| 1  | 2.361742  | 0.622143  | -1.210541 |

-----  
Cartesian coordinates of : MeOH\_8.log

-----  
Atomic number (AN) and Cartesian coordinates

| AN | X | Y | Z |
|----|---|---|---|
|----|---|---|---|

-----

|   |           |           |           |
|---|-----------|-----------|-----------|
| 8 | -3.259823 | -0.765522 | -1.768650 |
| 1 | -2.714379 | -1.125032 | -1.039447 |
| 8 | -1.906698 | -1.779170 | 0.390794  |
| 1 | -1.470585 | -1.137153 | 0.994411  |
| 8 | -0.523282 | -0.015809 | 1.883848  |
| 1 | -0.833209 | 0.910661  | 1.729632  |
| 6 | -4.600659 | -0.720116 | -1.317459 |
| 1 | -4.717764 | -0.050992 | -0.454689 |
| 1 | -5.216426 | -0.337906 | -2.134398 |
| 1 | -4.971355 | -1.714205 | -1.039092 |
| 6 | -1.012598 | -2.861685 | 0.171190  |
| 1 | -0.044010 | -2.516094 | -0.208576 |
| 1 | -0.848900 | -3.430314 | 1.093904  |
| 1 | -1.465725 | -3.521972 | -0.571145 |
| 6 | -0.100659 | -0.180649 | 3.229108  |
| 1 | 0.842289  | 0.348666  | 3.409762  |
| 1 | -0.856396 | 0.180869  | 3.933595  |
| 1 | 0.056077  | -1.247749 | 3.401646  |
| 8 | -1.487033 | 2.356229  | 1.180439  |
| 1 | -0.804773 | 2.657148  | 0.534597  |
| 6 | -2.677356 | 1.988503  | 0.489638  |
| 1 | -3.421618 | 1.718362  | 1.241329  |
| 1 | -3.061983 | 2.823485  | -0.104112 |
| 1 | -2.510710 | 1.127648  | -0.170250 |
| 8 | 0.666462  | 2.938371  | -0.300948 |
| 1 | 0.729880  | 2.391194  | -1.117849 |
| 6 | 1.657532  | 2.446855  | 0.595462  |
| 1 | 1.610455  | 1.351977  | 0.675607  |
| 1 | 2.660989  | 2.742163  | 0.272144  |
| 1 | 1.462841  | 2.876199  | 1.580959  |
| 8 | 0.898618  | 1.024614  | -2.159053 |
| 1 | 1.787168  | 0.628962  | -2.009340 |
| 6 | -0.059389 | 0.112320  | -1.629613 |
| 1 | -1.054537 | 0.470282  | -1.900573 |
| 1 | 0.074737  | -0.890330 | -2.051950 |
| 1 | 0.009766  | 0.049099  | -0.533271 |
| 8 | 3.174972  | -0.296682 | -1.583834 |
| 1 | 2.946354  | -1.128275 | -1.118365 |
| 6 | 4.254365  | 0.317414  | -0.890576 |
| 1 | 4.022498  | 0.450565  | 0.172256  |
| 1 | 5.168859  | -0.276551 | -0.986460 |
| 1 | 4.422005  | 1.298150  | -1.339119 |
| 6 | 2.191359  | -1.888291 | 1.288184  |
| 1 | 1.476154  | -1.079329 | 1.118387  |
| 1 | 1.711381  | -2.658217 | 1.900079  |
| 1 | 3.068436  | -1.497094 | 1.813367  |
| 8 | 2.543465  | -2.408145 | 0.005114  |
| 1 | 3.173444  | -3.131424 | 0.109685  |

-----  
Cartesian coordinates of : MeOH\_8r\_DDDUDDU.log

-----  
Atomic number (AN) and Cartesian coordinates

| AN | X         | Y         | Z         |
|----|-----------|-----------|-----------|
| 6  | 3.464573  | -0.338989 | -1.951967 |
| 8  | 3.182482  | 0.211157  | -0.670126 |
| 8  | 1.515219  | 2.288460  | -0.727184 |
| 6  | 2.290511  | 3.447147  | -0.441997 |
| 8  | -0.157013 | 1.729259  | 1.284738  |
| 6  | 0.723372  | 0.923833  | 2.057376  |
| 8  | -2.726162 | 1.048374  | 0.998546  |
| 6  | -3.455664 | 2.270475  | 1.025740  |
| 8  | 2.398523  | -1.959899 | 0.686596  |
| 6  | 2.677797  | -2.258658 | 2.047320  |



|   |           |           |           |
|---|-----------|-----------|-----------|
| 8 | -0.136105 | -2.654729 | 0.161292  |
| 6 | -1.011866 | -2.005488 | 1.076748  |
| 8 | -0.900580 | -1.217499 | -1.964159 |
| 6 | -0.165342 | -0.034596 | -1.667837 |
| 8 | -3.300871 | -0.357829 | -1.192063 |
| 6 | -4.407766 | -1.209808 | -0.930975 |
| 1 | 2.664910  | -1.013143 | -2.278667 |
| 1 | 4.412412  | -0.886103 | -1.941396 |
| 1 | 3.540131  | 0.487898  | -2.661219 |
| 1 | 2.928482  | -0.530733 | -0.073302 |
| 1 | 3.065386  | 3.594930  | -1.200953 |
| 1 | 2.763913  | 3.377638  | 0.544022  |
| 1 | 1.619660  | 4.307763  | -0.451530 |
| 1 | 2.118181  | 1.504326  | -0.723816 |
| 1 | 1.558820  | 1.516786  | 2.445833  |
| 1 | 1.123853  | 0.091157  | 1.463793  |
| 1 | 0.157561  | 0.515886  | 2.897952  |
| 1 | 0.340840  | 2.011425  | 0.480389  |
| 1 | 0.509401  | -0.211567 | -0.817973 |
| 1 | -0.835522 | 0.792115  | -1.408797 |
| 1 | 0.436421  | 0.259047  | -2.532479 |
| 1 | -1.848403 | -1.026094 | -1.768998 |
| 1 | -3.134937 | 2.942919  | 0.222788  |
| 1 | -3.333885 | 2.775667  | 1.988819  |
| 1 | -4.511206 | 2.030455  | 0.884629  |
| 1 | -1.766585 | 1.257806  | 1.100257  |
| 1 | -5.299567 | -0.625558 | -0.681618 |
| 1 | -4.195697 | -1.904254 | -0.110556 |
| 1 | -4.607121 | -1.785511 | -1.836238 |
| 1 | -3.089901 | 0.158433  | -0.375217 |
| 1 | 2.556843  | -3.328290 | 2.245398  |
| 1 | 2.026314  | -1.693918 | 2.725278  |
| 1 | 3.713894  | -1.978674 | 2.244035  |
| 1 | 1.481897  | -2.253532 | 0.465786  |
| 1 | -2.028113 | -2.405421 | 0.998436  |
| 1 | -1.043417 | -0.923225 | 0.897139  |
| 1 | -0.638396 | -2.185784 | 2.087310  |
| 1 | -0.383796 | -2.334293 | -0.736664 |

-----

Cartesian coordinates of : MeOH\_8r\_DDDUUUU.log

-----

Atomic number (AN) and Cartesian coordinates

| AN | X         | Y         | Z         |
|----|-----------|-----------|-----------|
| 6  | 0.207930  | -0.234487 | 2.317643  |
| 8  | 1.401499  | -0.757366 | 1.753433  |
| 8  | 2.518733  | 1.187819  | 0.326044  |
| 6  | 3.279425  | 2.099546  | 1.109382  |
| 8  | 0.597325  | 2.619312  | -0.772184 |
| 6  | 0.664249  | 3.111154  | -2.102359 |
| 8  | -1.897558 | 2.096294  | -0.090737 |
| 6  | -2.209975 | 2.763756  | 1.126189  |
| 8  | -2.992333 | -0.281016 | 0.313218  |
| 6  | -4.378260 | -0.267802 | -0.008725 |
| 8  | -1.914251 | -2.533613 | -0.606022 |
| 6  | -1.277064 | -3.137584 | 0.516117  |
| 8  | 0.282989  | -1.768596 | -1.943556 |
| 6  | 0.311267  | -0.389299 | -1.591148 |
| 8  | 2.057201  | -2.641490 | -0.107157 |
| 6  | 3.369342  | -2.154112 | -0.384646 |
| 1  | -0.531348 | 0.021432  | 1.544835  |
| 1  | 0.416259  | 0.660023  | 2.915221  |
| 1  | -0.223198 | -0.997940 | 2.968273  |
| 1  | 1.842792  | -0.034349 | 1.239834  |

|   |           |           |           |
|---|-----------|-----------|-----------|
| 1 | 4.064945  | -2.435295 | 0.412575  |
| 1 | 3.368148  | -1.063628 | -0.495891 |
| 1 | 3.699611  | -2.612010 | -1.318438 |
| 1 | 1.714296  | -2.133241 | 0.658007  |
| 1 | 1.266304  | 0.072971  | -1.865137 |
| 1 | 0.152811  | -0.251160 | -0.512722 |
| 1 | -0.496003 | 0.112283  | -2.130647 |
| 1 | 0.966799  | -2.215211 | -1.392777 |
| 1 | -1.810622 | 2.222979  | 1.991270  |
| 1 | -3.292590 | 2.877430  | 1.243065  |
| 1 | -1.754580 | 3.755288  | 1.089248  |
| 1 | -2.244709 | 1.171945  | -0.031549 |
| 1 | -0.513587 | -2.474164 | 0.941433  |
| 1 | -0.809783 | -4.087153 | 0.237794  |
| 1 | -2.041333 | -3.322942 | 1.272744  |
| 1 | -1.205991 | -2.320545 | -1.256889 |
| 1 | -4.890383 | -1.124433 | 0.440564  |
| 1 | -4.536388 | -0.281073 | -1.092250 |
| 1 | -4.806660 | 0.650056  | 0.398693  |
| 1 | -2.587976 | -1.102180 | -0.061353 |
| 1 | 2.656091  | 2.594962  | 1.862116  |
| 1 | 3.748900  | 2.859619  | 0.476827  |
| 1 | 4.061542  | 1.531539  | 1.616527  |
| 1 | 1.800535  | 1.693307  | -0.132341 |
| 1 | 0.087730  | 4.035957  | -2.206872 |
| 1 | 0.292552  | 2.374188  | -2.822987 |
| 1 | 1.711750  | 3.322249  | -2.326355 |
| 1 | -0.336238 | 2.381309  | -0.541840 |

-----

Cartesian coordinates of : MeOH\_8r\_UDDDUDDD.log

-----

Atomic number (AN) and Cartesian coordinates

| AN | X         | Y         | Z         |
|----|-----------|-----------|-----------|
| 6  | 0.006789  | -0.298655 | -1.549028 |
| 8  | -1.198321 | -1.026866 | -1.764645 |
| 8  | -0.975696 | -3.286930 | -0.367053 |
| 6  | -2.271152 | -3.683681 | 0.070113  |
| 8  | 0.429980  | -2.122351 | 1.556707  |
| 6  | -0.304253 | -0.913883 | 1.727351  |
| 8  | 2.805902  | -1.454930 | 0.566324  |
| 6  | 3.156751  | -2.421153 | -0.417655 |
| 8  | 2.650679  | 0.993425  | -0.456475 |
| 6  | 3.943154  | 1.570363  | -0.309319 |
| 8  | 0.771118  | 2.723671  | 0.252985  |
| 6  | 0.611754  | 3.494770  | -0.932027 |
| 8  | -1.591415 | 1.955986  | 1.181092  |
| 6  | -1.696612 | 2.135939  | 2.584687  |
| 8  | -2.973694 | 0.547341  | -0.590820 |
| 6  | -3.367117 | 1.559785  | -1.512460 |
| 1  | -0.193508 | 0.637026  | -1.013118 |
| 1  | 0.482707  | -0.066488 | -2.505676 |
| 1  | 0.702128  | -0.893793 | -0.944055 |
| 1  | -1.937993 | -0.511025 | -1.356740 |
| 1  | -2.854935 | -4.093616 | -0.759759 |
| 1  | -2.817715 | -2.841996 | 0.511840  |
| 1  | -2.144029 | -4.457473 | 0.828768  |
| 1  | -1.078038 | -2.520411 | -0.983461 |
| 1  | -0.726389 | -0.867820 | 2.735619  |
| 1  | -1.118675 | -0.841908 | 0.997925  |
| 1  | 0.359279  | -0.052772 | 1.580018  |
| 1  | -0.043300 | -2.673813 | 0.885574  |
| 1  | 0.402765  | 2.856096  | -1.798082 |
| 1  | 1.508293  | 4.089418  | -1.135204 |

|   |           |           |           |
|---|-----------|-----------|-----------|
| 1 | -0.232448 | 4.170425  | -0.780496 |
| 1 | 1.456077  | 2.030964  | 0.078306  |
| 1 | 2.331075  | -2.598307 | -1.117163 |
| 1 | 3.438877  | -3.369553 | 0.049819  |
| 1 | 4.011597  | -2.034225 | -0.975387 |
| 1 | 1.967972  | -1.745487 | 1.005277  |
| 1 | 4.691051  | 0.998465  | -0.867807 |
| 1 | 4.240146  | 1.619999  | 0.743537  |
| 1 | 3.904042  | 2.584121  | -0.713111 |
| 1 | 2.667912  | 0.083665  | -0.067059 |
| 1 | -2.499632 | 2.122567  | -1.876974 |
| 1 | -4.075515 | 2.253498  | -1.049768 |
| 1 | -3.851601 | 1.069961  | -2.358635 |
| 1 | -2.508517 | 0.993659  | 0.156507  |
| 1 | -1.746039 | 3.199023  | 2.842961  |
| 1 | -0.848375 | 1.681722  | 3.108641  |
| 1 | -2.615345 | 1.648944  | 2.917043  |
| 1 | -0.696173 | 2.233448  | 0.865761  |

-----  
Cartesian coordinates of : MeOH\_8r\_UUDDUDD.log

-----  
Atomic number (AN) and Cartesian coordinates

| AN | X         | Y         | Z         |
|----|-----------|-----------|-----------|
| 6  | 4.231523  | -1.139249 | -0.521741 |
| 8  | 2.840580  | -1.022533 | -0.801249 |
| 8  | 2.273418  | 1.596475  | -0.797562 |
| 6  | 3.328107  | 2.283441  | -0.131071 |
| 8  | 0.173716  | 2.667589  | 0.436117  |
| 6  | -0.345141 | 3.675402  | -0.425128 |
| 8  | -2.061026 | 1.433187  | 1.234098  |
| 6  | -2.009418 | 0.209724  | 1.956429  |
| 8  | -3.508758 | 0.686789  | -0.882113 |
| 6  | -4.701710 | -0.005351 | -0.531980 |
| 8  | -1.533893 | -0.984394 | -1.519239 |
| 6  | -0.331786 | -0.229336 | -1.414057 |
| 8  | 1.321249  | -1.738262 | 1.267392  |
| 6  | 1.446299  | -0.577434 | 2.076590  |
| 8  | -0.922183 | -2.865116 | 0.304225  |
| 6  | -0.389962 | -4.005614 | -0.363514 |
| 1  | 4.493367  | -0.645735 | 0.421608  |
| 1  | 4.830234  | -0.708001 | -1.330301 |
| 1  | 4.465184  | -2.201783 | -0.439249 |
| 1  | 2.607425  | -0.064512 | -0.866465 |
| 1  | 1.026409  | 0.309475  | 1.581144  |
| 1  | 2.496921  | -0.380322 | 2.316858  |
| 1  | 0.900228  | -0.752268 | 3.004978  |
| 1  | 1.871237  | -1.590860 | 0.459453  |
| 1  | 0.032205  | -4.716596 | 0.353261  |
| 1  | 0.385511  | -3.717818 | -1.083346 |
| 1  | -1.207970 | -4.488135 | -0.900486 |
| 1  | -0.174612 | -2.422258 | 0.769579  |
| 1  | -1.555220 | -0.591842 | 1.358167  |
| 1  | -3.011862 | -0.105177 | 2.264768  |
| 1  | -1.403286 | 0.372542  | 2.849042  |
| 1  | -2.634630 | 1.285993  | 0.443269  |
| 1  | 0.522075  | -0.792658 | -1.805519 |
| 1  | -0.127576 | 0.046993  | -0.370471 |
| 1  | -0.454115 | 0.686248  | -1.997783 |
| 1  | -1.455963 | -1.734013 | -0.883944 |
| 1  | -4.486984 | -0.874593 | 0.100298  |
| 1  | -5.237420 | -0.338431 | -1.426477 |
| 1  | -5.338255 | 0.685418  | 0.023683  |
| 1  | -2.849337 | 0.032305  | -1.217250 |

|   |           |          |           |
|---|-----------|----------|-----------|
| 1 | 3.409738  | 1.966786 | 0.915344  |
| 1 | 3.170194  | 3.366112 | -0.164990 |
| 1 | 4.260607  | 2.048459 | -0.647899 |
| 1 | 1.429824  | 1.872111 | -0.364385 |
| 1 | -0.922026 | 4.413578 | 0.140702  |
| 1 | -0.981535 | 3.242259 | -1.205310 |
| 1 | 0.500833  | 4.176852 | -0.899795 |
| 1 | -0.593505 | 2.160499 | 0.794998  |

-----

Cartesian coordinates of the methanol nonamer

Cartesian coordinates of : MeOH\_9r\_Flat.log

-----

Atomic number (AN) and Cartesian coordinates

| AN | X         | Y         | Z         |
|----|-----------|-----------|-----------|
| 6  | 4.659902  | 1.013439  | -1.038975 |
| 8  | 3.650388  | 0.408947  | -0.239989 |
| 8  | 2.627388  | -1.740373 | -1.446492 |
| 6  | 3.818301  | -2.443990 | -1.779562 |
| 8  | 2.399582  | 2.569669  | 0.675135  |
| 6  | 2.884484  | 2.983038  | 1.944512  |
| 8  | -0.000280 | 3.717529  | 0.595922  |
| 6  | 0.126333  | 4.943999  | -0.111512 |
| 8  | -2.417190 | 2.926399  | -0.201738 |
| 6  | -3.438189 | 3.549661  | 0.565588  |
| 8  | -3.569799 | 0.594926  | -0.767735 |
| 6  | -4.110805 | 0.562172  | -2.080776 |
| 8  | -3.141009 | -1.987059 | -0.280407 |
| 6  | -4.309529 | -2.527136 | 0.322943  |
| 8  | -1.204168 | -3.180773 | 1.130691  |
| 6  | -1.552327 | -4.558015 | 1.209435  |
| 8  | 1.284165  | -3.337688 | 0.207602  |
| 6  | 2.237304  | -3.493709 | 1.250777  |
| 1  | 5.378032  | 0.238411  | -1.314523 |
| 1  | 5.184126  | 1.794657  | -0.479082 |
| 1  | 4.239608  | 1.449005  | -1.952144 |
| 1  | 3.066832  | 1.127476  | 0.099560  |
| 1  | 3.916521  | 2.637187  | 2.035255  |
| 1  | 2.294396  | 2.549759  | 2.758999  |
| 1  | 2.870669  | 4.074622  | 2.033668  |
| 1  | 1.466757  | 2.875181  | 0.581505  |
| 1  | -0.647934 | 5.655890  | 0.193631  |
| 1  | 0.064681  | 4.789142  | -1.193863 |
| 1  | 1.104232  | 5.367368  | 0.128157  |
| 1  | -0.854030 | 3.299133  | 0.334592  |
| 1  | -4.370955 | 3.615455  | -0.004363 |
| 1  | -3.103917 | 4.560557  | 0.808527  |
| 1  | -3.625662 | 3.006500  | 1.497895  |
| 1  | -2.711472 | 2.009463  | -0.411293 |
| 1  | -3.377529 | 0.195694  | -2.806981 |
| 1  | -4.393251 | 1.582360  | -2.349637 |
| 1  | -5.003248 | -0.071523 | -2.122254 |
| 1  | -3.302012 | -0.320572 | -0.517106 |
| 1  | -4.418555 | -3.590922 | 0.085619  |
| 1  | -5.172312 | -1.989676 | -0.076933 |
| 1  | -4.291079 | -2.401161 | 1.411036  |
| 1  | -2.354858 | -2.354677 | 0.189585  |
| 1  | -1.703411 | -4.989560 | 0.213152  |
| 1  | -2.483279 | -4.637258 | 1.774539  |
| 1  | -0.776762 | -5.128673 | 1.730446  |
| 1  | -0.294438 | -3.124438 | 0.750214  |

|   |          |           |           |
|---|----------|-----------|-----------|
| 1 | 1.741204 | -3.985454 | 2.090414  |
| 1 | 2.620181 | -2.524054 | 1.587561  |
| 1 | 3.076940 | -4.117020 | 0.924277  |
| 1 | 1.669758 | -2.721606 | -0.460930 |
| 1 | 3.542134 | -3.467298 | -2.043257 |
| 1 | 4.511743 | -2.473520 | -0.931118 |
| 1 | 4.319802 | -1.983035 | -2.637119 |
| 1 | 2.891619 | -0.896774 | -1.006515 |

-----  
Cartesian coordinates of : MeOH\_N9\_0.log

-----  
Atomic number (AN) and Cartesian coordinates

| AN | X         | Y         | Z         |
|----|-----------|-----------|-----------|
| 6  | 3.454263  | 1.803575  | 2.322350  |
| 8  | 2.449414  | 0.926895  | 1.825299  |
| 8  | 3.064205  | 0.376474  | -0.685310 |
| 6  | 2.703591  | 1.533073  | -1.432148 |
| 8  | 0.018720  | 1.891623  | 1.486256  |
| 6  | -0.809902 | 0.739463  | 1.584562  |
| 8  | -0.671415 | 3.082809  | -0.763371 |
| 6  | -1.755047 | 3.934928  | -0.407665 |
| 8  | 1.914959  | -1.804118 | -1.666422 |
| 6  | 2.904485  | -2.812668 | -1.840146 |
| 8  | 0.378272  | -2.734547 | 0.279386  |
| 6  | 1.157161  | -2.560613 | 1.458960  |
| 8  | -2.075455 | -2.014222 | 0.984089  |
| 6  | -2.848637 | -3.195123 | 1.165786  |
| 8  | -3.461951 | -0.421359 | -0.635739 |
| 6  | -4.407403 | 0.411295  | 0.023624  |
| 8  | -1.553429 | 0.869717  | -1.962542 |
| 6  | -0.447268 | -0.022387 | -1.898741 |
| 1  | 2.705505  | 0.639979  | 0.911153  |
| 1  | 3.145668  | 2.136352  | 3.314653  |
| 1  | 3.573714  | 2.680566  | 1.676296  |
| 1  | 4.414985  | 1.286221  | 2.405909  |
| 1  | -1.260004 | 1.743975  | -1.605686 |
| 1  | -0.824649 | -1.042393 | -2.011700 |
| 1  | 0.072500  | 0.050864  | -0.932595 |
| 1  | 0.270039  | 0.175451  | -2.701277 |
| 1  | -0.540060 | -2.409275 | 0.452811  |
| 1  | 1.937859  | -3.324535 | 1.470658  |
| 1  | 0.536666  | -2.676969 | 2.353196  |
| 1  | 1.629561  | -1.570133 | 1.481900  |
| 1  | 1.252092  | -2.133837 | -1.008768 |
| 1  | 3.629422  | -2.445666 | -2.568613 |
| 1  | 2.456815  | -3.736046 | -2.220113 |
| 1  | 3.425446  | -3.025977 | -0.899687 |
| 1  | -0.300320 | 2.699808  | 0.071693  |
| 1  | -2.188140 | 4.327762  | -1.329022 |
| 1  | -1.408824 | 4.772144  | 0.206067  |
| 1  | -2.529207 | 3.385710  | 0.141645  |
| 1  | -2.574701 | -1.402886 | 0.387105  |
| 1  | -2.279200 | -3.869932 | 1.807947  |
| 1  | -3.043358 | -3.695118 | 0.210963  |
| 1  | -3.801709 | -2.965201 | 1.652652  |
| 1  | 2.606993  | -0.419321 | -1.059937 |
| 1  | 3.435163  | 2.314301  | -1.215943 |
| 1  | 1.706497  | 1.896263  | -1.152933 |
| 1  | 2.718607  | 1.324427  | -2.506445 |
| 1  | 0.954030  | 1.615648  | 1.662518  |
| 1  | -1.582190 | 0.792162  | 0.808361  |
| 1  | -1.296385 | 0.687588  | 2.563902  |
| 1  | -0.231752 | -0.176977 | 1.428781  |

|   |           |           |           |
|---|-----------|-----------|-----------|
| 1 | -2.830921 | 0.135536  | -1.155457 |
| 1 | -5.116449 | -0.237646 | 0.540503  |
| 1 | -4.953089 | 1.029671  | -0.695572 |
| 1 | -3.924620 | 1.062059  | 0.762376  |

-----  
Cartesian coordinates of : MeOH\_N9\_10.log

-----  
Atomic number (AN) and Cartesian coordinates

| AN | X         | Y         | Z         |
|----|-----------|-----------|-----------|
| 6  | -0.969129 | -3.696622 | 0.633818  |
| 8  | -1.289480 | -3.040349 | -0.590299 |
| 8  | 0.759890  | -1.500693 | -1.062441 |
| 6  | 0.331141  | -0.313896 | -1.723010 |
| 8  | -3.280278 | -1.389529 | -0.048834 |
| 6  | -4.527489 | -1.660369 | -0.677652 |
| 8  | -2.977252 | 1.239333  | -0.231218 |
| 6  | -3.345597 | 1.873954  | 0.987039  |
| 8  | -0.837471 | 2.635946  | -0.970287 |
| 6  | -1.126594 | 4.026597  | -0.884301 |
| 8  | 1.415618  | 2.384267  | 0.413676  |
| 6  | 1.326791  | 2.663091  | 1.804573  |
| 8  | 3.525838  | 0.813965  | -0.038934 |
| 6  | 4.154653  | 1.181853  | -1.261464 |
| 8  | 3.354752  | -1.861717 | -0.383603 |
| 6  | 3.342651  | -2.794721 | 0.693272  |
| 8  | 0.832367  | -0.628527 | 1.605637  |
| 6  | -0.473131 | -0.077700 | 1.639469  |
| 1  | -2.047154 | -2.421069 | -0.427485 |
| 1  | -0.274160 | -4.506860 | 0.405914  |
| 1  | -1.867296 | -4.118530 | 1.094133  |
| 1  | -0.489999 | -3.007648 | 1.340921  |
| 1  | 2.476660  | -1.877574 | -0.814557 |
| 1  | 4.286140  | -2.688190 | 1.230281  |
| 1  | 3.261642  | -3.820142 | 0.319206  |
| 1  | 2.516061  | -2.593617 | 1.383968  |
| 1  | 0.978957  | -0.946611 | 0.696562  |
| 1  | -0.694651 | 0.195822  | 2.674110  |
| 1  | -1.231834 | -0.797956 | 1.302221  |
| 1  | -0.542608 | 0.822940  | 1.015359  |
| 1  | 0.011011  | 2.463607  | -0.494205 |
| 1  | -2.069129 | 4.202973  | -1.406407 |
| 1  | -0.340957 | 4.618881  | -1.363495 |
| 1  | -1.234915 | 4.348828  | 0.157715  |
| 1  | -2.169466 | 1.690990  | -0.577572 |
| 1  | -4.073204 | 1.235399  | 1.492945  |
| 1  | -3.803287 | 2.850483  | 0.796778  |
| 1  | -2.477848 | 2.008124  | 1.643781  |
| 1  | -0.004884 | -2.136694 | -0.991816 |
| 1  | 1.045401  | 0.479912  | -1.486570 |
| 1  | -0.659402 | -0.006945 | -1.367253 |
| 1  | 0.296860  | -0.456033 | -2.807339 |
| 1  | 3.472358  | -0.167365 | -0.010917 |
| 1  | 4.127083  | 2.270724  | -1.333733 |
| 1  | 3.628627  | 0.756382  | -2.123523 |
| 1  | 5.197911  | 0.851685  | -1.279714 |
| 1  | -3.086446 | -0.423573 | -0.136256 |
| 1  | -4.725556 | -2.728919 | -0.576827 |
| 1  | -4.501615 | -1.402459 | -1.741454 |
| 1  | -5.335436 | -1.103934 | -0.191911 |
| 1  | 2.150905  | 1.744664  | 0.258161  |
| 1  | 0.363054  | 3.145340  | 1.990575  |
| 1  | 2.126164  | 3.342698  | 2.118274  |
| 1  | 1.379346  | 1.739996  | 2.390087  |

-----  
Cartesian coordinates of : MeOH\_N9\_12.log

-----  
Atomic number (AN) and Cartesian coordinates

| AN | X         | Y         | Z         |
|----|-----------|-----------|-----------|
| 6  | -1.073256 | 2.434183  | -1.996686 |
| 8  | -2.125695 | 2.041249  | -1.123879 |
| 8  | -1.249270 | 2.162557  | 1.381240  |
| 6  | -2.012631 | 1.218440  | 2.120375  |
| 8  | 1.383272  | 2.462343  | 1.091185  |
| 6  | 1.503376  | 3.880761  | 1.041140  |
| 8  | 2.452311  | 1.362607  | -1.064557 |
| 6  | 3.787947  | 1.087330  | -0.655651 |
| 8  | -2.983184 | -0.502380 | -1.060704 |
| 6  | -4.349059 | -0.363505 | -0.683799 |
| 8  | -1.995408 | -2.107965 | 0.843319  |
| 6  | -2.144547 | -3.475451 | 0.478245  |
| 8  | 0.578483  | -1.940025 | 1.584907  |
| 6  | 1.192820  | -0.664554 | 1.725641  |
| 8  | 2.151458  | -2.970288 | -0.324556 |
| 6  | 3.536015  | -2.931199 | -0.001023 |
| 8  | 1.328449  | -0.922413 | -1.835502 |
| 6  | -0.066958 | -0.828832 | -1.587481 |
| 1  | -2.333417 | 1.081522  | -1.218750 |
| 1  | -1.039712 | 3.524964  | -2.001254 |
| 1  | -1.253856 | 2.082388  | -3.016902 |
| 1  | -0.102155 | 2.053900  | -1.653362 |
| 1  | 1.130666  | -2.468234 | 0.961460  |
| 1  | 0.454399  | 0.026975  | 2.137345  |
| 1  | 1.531331  | -0.277400 | 0.756395  |
| 1  | 2.048534  | -0.712641 | 2.408222  |
| 1  | -1.609238 | 2.193782  | 0.460513  |
| 1  | -1.548398 | 1.101934  | 3.101744  |
| 1  | -2.036244 | 0.241336  | 1.621500  |
| 1  | -3.040002 | 1.571963  | 2.259557  |
| 1  | 0.435636  | 2.244095  | 1.260442  |
| 1  | 2.544927  | 4.118118  | 0.816287  |
| 1  | 1.237856  | 4.327508  | 2.003929  |
| 1  | 0.865420  | 4.305506  | 0.258244  |
| 1  | 1.948792  | -2.243841 | -0.961353 |
| 1  | 3.739522  | -3.753347 | 0.686681  |
| 1  | 3.806999  | -1.987899 | 0.488293  |
| 1  | 4.152598  | -3.057946 | -0.896380 |
| 1  | -2.543342 | -1.073488 | -0.386178 |
| 1  | -4.830119 | 0.292326  | -1.411554 |
| 1  | -4.443030 | 0.083521  | 0.312494  |
| 1  | -4.857574 | -1.332918 | -0.691304 |
| 1  | 1.985444  | 1.785341  | -0.299264 |
| 1  | 4.239619  | 0.426141  | -1.398422 |
| 1  | 3.808479  | 0.589474  | 0.320808  |
| 1  | 4.375994  | 2.008769  | -0.597559 |
| 1  | 1.745804  | -0.051988 | -1.620355 |
| 1  | -0.459028 | -1.839744 | -1.445404 |
| 1  | -0.590226 | -0.368193 | -2.432065 |
| 1  | -0.275530 | -0.246937 | -0.676864 |
| 1  | -1.063309 | -1.974997 | 1.141107  |
| 1  | -3.148632 | -3.604382 | 0.069780  |
| 1  | -2.030831 | -4.126795 | 1.350375  |
| 1  | -1.412940 | -3.767356 | -0.284400 |

-----  
Cartesian coordinates of : MeOH\_N9\_13.log

-----  
Atomic number (AN) and Cartesian coordinates

| AN | X         | Y         | Z         |
|----|-----------|-----------|-----------|
| 6  | 3.414159  | 1.537214  | 1.573715  |
| 8  | 2.242580  | 0.977232  | 0.980052  |
| 8  | 2.922943  | -1.183526 | -0.266443 |
| 6  | 3.467114  | -0.705776 | -1.494286 |
| 8  | 1.015529  | -2.867209 | -0.888600 |
| 6  | 1.494754  | -4.201306 | -0.747790 |
| 8  | -0.839610 | -2.479003 | 0.937302  |
| 6  | -0.150798 | -1.766688 | 1.957746  |
| 8  | -3.096105 | -1.181074 | 0.458408  |
| 6  | -3.836799 | -0.980920 | 1.656049  |
| 8  | -3.121338 | 1.082015  | -0.933962 |
| 6  | -4.048164 | 0.970763  | -2.009561 |
| 8  | -0.676382 | 1.101128  | -1.987169 |
| 6  | -0.161386 | -0.169270 | -1.609730 |
| 8  | 1.318015  | 2.602982  | -0.970254 |
| 6  | 1.168830  | 3.877277  | -0.351987 |
| 8  | -0.091288 | 1.735025  | 2.328114  |
| 6  | -1.131691 | 1.641080  | 1.372566  |
| 1  | 2.474299  | 0.090052  | 0.574922  |
| 1  | 3.128431  | 2.476455  | 2.051596  |
| 1  | 4.175673  | 1.740535  | 0.813545  |
| 1  | 3.825263  | 0.862732  | 2.329669  |
| 1  | -0.018368 | 1.778947  | -1.712318 |
| 1  | -0.984300 | -0.889752 | -1.626718 |
| 1  | 0.256644  | -0.142469 | -0.592624 |
| 1  | 0.614323  | -0.509330 | -2.303245 |
| 1  | -1.662092 | -1.984767 | 0.692836  |
| 1  | 0.517801  | -2.464863 | 2.465746  |
| 1  | -0.850791 | -1.348087 | 2.688635  |
| 1  | 0.450757  | -0.947102 | 1.541577  |
| 1  | 0.239363  | -2.746357 | -0.282004 |
| 1  | 2.398608  | -4.295662 | -1.352465 |
| 1  | 0.751859  | -4.919858 | -1.106341 |
| 1  | 1.740707  | -4.426171 | 0.295744  |
| 1  | 1.714196  | 1.990099  | -0.311402 |
| 1  | 0.506770  | 4.478349  | -0.977481 |
| 1  | 2.135950  | 4.384029  | -0.269651 |
| 1  | 0.726870  | 3.782991  | 0.646961  |
| 1  | -3.094814 | -0.339275 | -0.063735 |
| 1  | -3.799902 | -1.909480 | 2.229187  |
| 1  | -4.882037 | -0.744204 | 1.433576  |
| 1  | -3.406980 | -0.174103 | 2.261036  |
| 1  | 2.174544  | -1.808293 | -0.470922 |
| 1  | 4.527249  | -0.493388 | -1.342546 |
| 1  | 2.963195  | 0.214760  | -1.815609 |
| 1  | 3.363588  | -1.459191 | -2.280485 |
| 1  | 0.725039  | 1.385115  | 1.928106  |
| 1  | -2.037605 | 2.055223  | 1.820667  |
| 1  | -1.335192 | 0.599002  | 1.087389  |
| 1  | -0.905165 | 2.209706  | 0.461479  |
| 1  | -2.219134 | 1.220775  | -1.311874 |
| 1  | -5.025556 | 0.739975  | -1.582082 |
| 1  | -3.762825 | 0.167156  | -2.697389 |
| 1  | -4.117229 | 1.911656  | -2.563687 |

-----  
Cartesian coordinates of : MeOH\_N9\_15.log-----  
Atomic number (AN) and Cartesian coordinates

| AN | X | Y | Z |
|----|---|---|---|
|----|---|---|---|

-----



|   |           |           |           |
|---|-----------|-----------|-----------|
| 6 | -0.047890 | 0.282566  | -1.080171 |
| 8 | 0.225940  | -0.624979 | -2.132583 |
| 8 | 2.602216  | -1.480029 | -0.938363 |
| 6 | 3.605812  | -2.395996 | -1.366323 |
| 8 | 1.239486  | -2.154781 | 1.188354  |
| 6 | 1.450747  | -1.188846 | 2.213081  |
| 8 | -1.386310 | -2.303752 | 0.852543  |
| 6 | -2.035521 | -2.680727 | 2.059423  |
| 8 | -3.271225 | -1.016723 | -0.543673 |
| 6 | -3.217339 | -1.335555 | -1.931976 |
| 8 | 3.140744  | 1.139167  | -0.629162 |
| 6 | 3.124583  | 1.621426  | -1.968943 |
| 8 | 1.374962  | 2.303348  | 1.001458  |
| 6 | 2.063403  | 2.688027  | 2.181832  |
| 8 | -1.280206 | 2.152489  | 1.248186  |
| 6 | -1.448473 | 1.038286  | 2.115955  |
| 8 | -3.231058 | 1.687139  | -0.528748 |
| 6 | -3.097269 | 2.250744  | -1.827636 |
| 1 | 1.109169  | -1.000214 | -1.972647 |
| 1 | -1.128030 | 0.303026  | -0.909394 |
| 1 | 0.286691  | 1.301584  | -1.321083 |
| 1 | 0.435306  | -0.025528 | -0.144402 |
| 1 | 2.001230  | 1.859627  | 0.380020  |
| 1 | 1.343406  | 3.176942  | 2.841557  |
| 1 | 2.870163  | 3.393087  | 1.956817  |
| 1 | 2.482625  | 1.818422  | 2.701377  |
| 1 | 0.273848  | -2.192297 | 0.978755  |
| 1 | 2.475288  | -1.302044 | 2.572137  |
| 1 | 0.761703  | -1.351502 | 3.048758  |
| 1 | 1.316675  | -0.165829 | 1.836453  |
| 1 | -2.017240 | -1.779201 | 0.302767  |
| 1 | -1.340539 | -3.299152 | 2.631429  |
| 1 | -2.938796 | -3.263172 | 1.853337  |
| 1 | -2.303770 | -1.803193 | 2.659757  |
| 1 | -2.481293 | 1.979482  | 0.040582  |
| 1 | -3.955011 | 1.926121  | -2.419232 |
| 1 | -2.178709 | 1.910482  | -2.320889 |
| 1 | -3.094144 | 3.344145  | -1.782225 |
| 1 | 2.127813  | -1.827743 | -0.133419 |
| 1 | 4.114719  | -1.952040 | -2.223315 |
| 1 | 3.158927  | -3.346897 | -1.670417 |
| 1 | 4.335842  | -2.575018 | -0.571413 |
| 1 | -3.312059 | -0.036018 | -0.459882 |
| 1 | -3.174751 | -2.422768 | -2.019347 |
| 1 | -2.323129 | -0.910813 | -2.403227 |
| 1 | -4.112342 | -0.974895 | -2.448790 |
| 1 | -0.321077 | 2.235420  | 1.042817  |
| 1 | -2.494046 | 1.017154  | 2.432391  |
| 1 | -0.813309 | 1.131073  | 3.004097  |
| 1 | -1.213838 | 0.094202  | 1.606497  |
| 1 | 3.045034  | 0.160968  | -0.659217 |
| 1 | 2.992902  | 2.704502  | -1.932523 |
| 1 | 2.297512  | 1.182087  | -2.538673 |
| 1 | 4.068514  | 1.395406  | -2.475002 |

-----  
Cartesian coordinates of : MeOH\_N9\_16.log

-----  
Atomic number (AN) and Cartesian coordinates

| AN | X         | Y        | Z         |
|----|-----------|----------|-----------|
| 6  | 0.674218  | 4.251287 | -0.049405 |
| 8  | 0.434048  | 2.848851 | -0.123297 |
| 8  | -1.649067 | 2.078589 | 1.227465  |
| 6  | -1.208447 | 1.015568 | 2.066753  |

|   |           |           |           |
|---|-----------|-----------|-----------|
| 8 | -3.642329 | 0.867616  | -0.020719 |
| 6 | -4.120596 | 1.316188  | -1.282306 |
| 8 | -2.800465 | -1.615576 | -0.361831 |
| 6 | -3.794667 | -2.580908 | -0.038421 |
| 8 | -0.599016 | -2.603627 | 0.702048  |
| 6 | 0.100218  | -3.314330 | -0.319218 |
| 8 | 1.419829  | -1.259529 | 1.775663  |
| 6 | 2.541569  | -2.137205 | 1.780835  |
| 8 | 2.251571  | 1.203956  | 1.028519  |
| 6 | 3.477583  | 1.379260  | 0.331308  |
| 8 | 0.699293  | 0.826735  | -1.986486 |
| 6 | -0.285778 | 0.080530  | -1.278835 |
| 8 | 2.573373  | -1.112356 | -1.293876 |
| 6 | 3.781430  | -1.234239 | -2.019480 |
| 1 | -0.424934 | 2.621755  | 0.333500  |
| 1 | 1.649157  | 4.445464  | -0.499390 |
| 1 | 0.687711  | 4.590027  | 0.991014  |
| 1 | -0.090093 | 4.805335  | -0.601780 |
| 1 | 1.699821  | -0.395143 | 1.398260  |
| 1 | 2.195492  | -3.112787 | 2.130800  |
| 1 | 3.314531  | -1.774242 | 2.467033  |
| 1 | 2.956594  | -2.235017 | 0.772873  |
| 1 | -1.948712 | -1.897224 | 0.060491  |
| 1 | -4.732324 | -2.260568 | -0.496901 |
| 1 | -3.937436 | -2.658658 | 1.044526  |
| 1 | -3.525506 | -3.564429 | -0.437040 |
| 1 | 0.756847  | 1.692350  | -1.542081 |
| 1 | -0.481368 | -0.835777 | -1.840023 |
| 1 | -1.221422 | 0.643304  | -1.182489 |
| 1 | 0.075805  | -0.193495 | -0.278537 |
| 1 | -3.323737 | -0.066376 | -0.115532 |
| 1 | -4.465918 | 2.344384  | -1.163191 |
| 1 | -4.958550 | 0.699292  | -1.622352 |
| 1 | -3.330710 | 1.294256  | -2.042179 |
| 1 | 2.074322  | -0.338828 | -1.615993 |
| 1 | 4.315221  | -2.102678 | -1.625807 |
| 1 | 4.423102  | -0.351907 | -1.897952 |
| 1 | 3.602326  | -1.392534 | -3.089697 |
| 1 | 0.065369  | -2.040982 | 1.169950  |
| 1 | -0.613053 | -3.562392 | -1.110535 |
| 1 | 0.519619  | -4.244610 | 0.079522  |
| 1 | 0.905551  | -2.699621 | -0.736785 |
| 1 | 1.598372  | 1.848519  | 0.680584  |
| 1 | 4.072249  | 0.473090  | 0.463457  |
| 1 | 4.030557  | 2.238051  | 0.726793  |
| 1 | 3.305726  | 1.524878  | -0.741532 |
| 1 | -2.442928 | 1.756758  | 0.730676  |
| 1 | -0.144436 | 1.158506  | 2.275584  |
| 1 | -1.339575 | 0.043685  | 1.575012  |
| 1 | -1.758737 | 1.013440  | 3.012457  |

-----  
 Cartesian coordinates of : MeOH\_N9\_21.log

-----  
 Atomic number (AN) and Cartesian coordinates

| AN | X         | Y         | Z         |
|----|-----------|-----------|-----------|
| 6  | -2.919451 | 1.346092  | 0.917976  |
| 8  | -2.689107 | -0.016438 | 1.274212  |
| 8  | -3.015878 | -1.636448 | -0.853675 |
| 6  | -4.018388 | -1.052763 | -1.678420 |
| 8  | -0.572399 | -1.285429 | -1.918934 |
| 6  | -0.431774 | 0.049639  | -1.436554 |
| 8  | 1.604790  | -2.307791 | -0.876253 |
| 6  | 2.566576  | -2.772666 | -1.819462 |

|   |           |           |           |
|---|-----------|-----------|-----------|
| 8 | -0.177753 | 0.103530  | 2.343918  |
| 6 | 0.241162  | 1.454924  | 2.195546  |
| 8 | 0.683181  | -2.507437 | 1.736060  |
| 6 | -0.683068 | -2.803617 | 1.479740  |
| 8 | 2.202165  | -0.122130 | 0.621854  |
| 6 | 3.307126  | -0.461433 | 1.454704  |
| 8 | 2.081610  | 2.325988  | -0.509848 |
| 6 | 2.974026  | 2.271024  | -1.614520 |
| 8 | -0.523526 | 3.063588  | -0.995592 |
| 6 | -0.804083 | 4.183503  | -0.176718 |
| 1 | -1.800968 | -0.077896 | 1.691112  |
| 1 | -3.890840 | 1.396686  | 0.421240  |
| 1 | -2.146803 | 1.720209  | 0.234906  |
| 1 | -2.952653 | 1.980738  | 1.810383  |
| 1 | 0.413839  | 2.811320  | -0.867454 |
| 1 | -1.852088 | 4.452570  | -0.328596 |
| 1 | -0.181945 | 5.047745  | -0.438479 |
| 1 | -0.658811 | 3.958051  | 0.888342  |
| 1 | 0.759447  | -2.062648 | -1.338632 |
| 1 | 3.490394  | -2.976705 | -1.276432 |
| 1 | 2.761154  | -2.013069 | -2.583172 |
| 1 | 2.224502  | -3.693054 | -2.300696 |
| 1 | 0.478403  | -0.493355 | 1.936314  |
| 1 | -0.424990 | 2.068784  | 2.806016  |
| 1 | 0.171095  | 1.780408  | 1.150573  |
| 1 | 1.269250  | 1.592679  | 2.544143  |
| 1 | -2.918761 | -1.086136 | -0.039978 |
| 1 | -4.153200 | -1.699836 | -2.546437 |
| 1 | -3.721238 | -0.055413 | -2.024558 |
| 1 | -4.970307 | -0.976560 | -1.143383 |
| 1 | 1.173856  | -2.686657 | 0.915801  |
| 1 | -1.258949 | -2.489872 | 2.352892  |
| 1 | -0.839743 | -3.875400 | 1.317241  |
| 1 | -1.050529 | -2.256245 | 0.602150  |
| 1 | -1.454702 | -1.599640 | -1.613487 |
| 1 | 0.495471  | 0.460103  | -1.844854 |
| 1 | -0.374296 | 0.074420  | -0.338031 |
| 1 | -1.264736 | 0.679134  | -1.761081 |
| 1 | 2.118156  | 1.458875  | -0.047924 |
| 1 | 2.883635  | 3.209768  | -2.163656 |
| 1 | 2.726377  | 1.443251  | -2.290027 |
| 1 | 4.009994  | 2.156724  | -1.278108 |
| 1 | 2.027621  | -0.869139 | 0.006945  |
| 1 | 3.509766  | 0.396602  | 2.098498  |
| 1 | 4.200246  | -0.677317 | 0.859945  |
| 1 | 3.064946  | -1.326830 | 2.080787  |

-----

Cartesian coordinates of : MeOH\_N9\_25.log

-----

Atomic number (AN) and Cartesian coordinates

| AN | X         | Y         | Z         |
|----|-----------|-----------|-----------|
| 6  | 3.656723  | -2.015207 | -0.776533 |
| 8  | 2.579026  | -1.133417 | -0.466010 |
| 8  | 0.496191  | -1.802248 | -1.863960 |
| 6  | -0.163410 | -2.806306 | -1.096355 |
| 8  | -1.568380 | -0.264771 | -2.427799 |
| 6  | -2.615752 | -1.102302 | -2.906730 |
| 8  | -2.646591 | 0.933082  | -0.319589 |
| 6  | -3.206519 | -0.018742 | 0.580072  |
| 8  | -1.152510 | 2.731105  | 0.957014  |
| 6  | -1.826069 | 3.976828  | 0.800080  |
| 8  | 1.025495  | 2.859772  | -0.577822 |
| 6  | 0.604466  | 2.099748  | -1.705289 |

|   |           |           |           |
|---|-----------|-----------|-----------|
| 8 | 3.232778  | 1.446002  | 0.059488  |
| 6 | 3.696653  | 1.348101  | 1.402000  |
| 8 | 0.909699  | -1.140094 | 1.734041  |
| 6 | 0.222451  | 0.005919  | 1.247912  |
| 8 | -1.320269 | -2.754101 | 2.035833  |
| 6 | -1.855189 | -2.287300 | 3.261699  |
| 1 | 1.815138  | -1.310531 | -1.084385 |
| 1 | 4.468882  | -1.805730 | -0.078660 |
| 1 | 4.011097  | -1.851315 | -1.798106 |
| 1 | 3.349301  | -3.059128 | -0.661419 |
| 1 | 1.879494  | 2.478625  | -0.271507 |
| 1 | -0.437898 | 2.354344  | -1.913824 |
| 1 | 0.666142  | 1.022519  | -1.504563 |
| 1 | 1.209518  | 2.333351  | -2.586835 |
| 1 | -2.063690 | 1.559710  | 0.176799  |
| 1 | -4.116615 | -0.416583 | 0.125939  |
| 1 | -3.468418 | 0.456111  | 1.531354  |
| 1 | -2.514065 | -0.848682 | 0.774059  |
| 1 | -0.447597 | -2.335299 | 1.910262  |
| 1 | -2.826760 | -2.764985 | 3.403839  |
| 1 | -2.005052 | -1.199441 | 3.253279  |
| 1 | -1.212522 | -2.545020 | 4.111711  |
| 1 | 3.034995  | 0.538026  | -0.257582 |
| 1 | 3.755446  | 2.358751  | 1.808829  |
| 1 | 4.691607  | 0.892983  | 1.438264  |
| 1 | 3.010133  | 0.756207  | 2.018979  |
| 1 | 1.629129  | -1.332383 | 1.102329  |
| 1 | -0.551726 | 0.268571  | 1.972456  |
| 1 | -0.257388 | -0.193489 | 0.278323  |
| 1 | 0.899853  | 0.860486  | 1.139206  |
| 1 | -0.193131 | -1.147348 | -2.144085 |
| 1 | 0.589964  | -3.333253 | -0.504506 |
| 1 | -0.666129 | -3.526047 | -1.750442 |
| 1 | -0.897511 | -2.365767 | -0.411455 |
| 1 | -1.913528 | 0.240013  | -1.648647 |
| 1 | -2.217541 | -1.696109 | -3.731827 |
| 1 | -3.455112 | -0.503830 | -3.274252 |
| 1 | -2.973320 | -1.781142 | -2.123579 |
| 1 | -0.274698 | 2.798188  | 0.509837  |
| 1 | -2.821820 | 3.871880  | 1.234291  |
| 1 | -1.926726 | 4.243026  | -0.258093 |
| 1 | -1.293083 | 4.776221  | 1.323314  |

-----  
Cartesian coordinates of : MeOH\_N9\_45.log

-----  
Atomic number (AN) and Cartesian coordinates

| AN | X         | Y         | Z         |
|----|-----------|-----------|-----------|
| 6  | -1.709319 | 0.728575  | 2.240914  |
| 8  | -1.471364 | -0.674905 | 2.159645  |
| 8  | 1.211697  | -0.511024 | 2.483608  |
| 6  | 2.039631  | -1.519781 | 1.911507  |
| 8  | 1.591092  | 1.874049  | 1.296751  |
| 6  | 2.923684  | 1.834682  | 0.791703  |
| 8  | -0.240050 | 2.746241  | -0.403953 |
| 6  | -0.644426 | 3.990310  | 0.159644  |
| 8  | -2.438673 | 1.416144  | -1.050775 |
| 6  | -2.671254 | 1.706371  | -2.425362 |
| 8  | -2.634125 | -1.068613 | -0.285160 |
| 6  | -4.025023 | -1.348707 | -0.123450 |
| 8  | -0.890141 | -3.014021 | -1.066504 |
| 6  | -0.656227 | -3.555719 | 0.228838  |
| 8  | 1.194814  | -1.371553 | -1.595186 |
| 6  | 0.553952  | -0.188197 | -1.146846 |

|   |           |           |           |
|---|-----------|-----------|-----------|
| 8 | 3.864133  | -1.042866 | -1.012364 |
| 6 | 4.237490  | -0.198405 | -2.086429 |
| 1 | -1.849210 | -0.978243 | 1.307331  |
| 1 | -1.388605 | 1.063214  | 3.229053  |
| 1 | -2.772823 | 0.955453  | 2.114820  |
| 1 | -1.136022 | 1.272930  | 1.479118  |
| 1 | 0.540067  | -2.099620 | -1.526198 |
| 1 | 1.287705  | 0.621682  | -1.168453 |
| 1 | 0.183463  | -0.290852 | -0.113975 |
| 1 | -0.284634 | 0.082816  | -1.798407 |
| 1 | 0.447382  | 2.353658  | 0.192098  |
| 1 | -1.402846 | 4.422992  | -0.495646 |
| 1 | 0.202391  | 4.679993  | 0.225670  |
| 1 | -1.075033 | 3.852637  | 1.158184  |
| 1 | -1.599340 | 1.863072  | -0.770637 |
| 1 | -3.594038 | 1.204374  | -2.720634 |
| 1 | -1.851624 | 1.342386  | -3.054907 |
| 1 | -2.789163 | 2.783452  | -2.577607 |
| 1 | -1.596321 | -2.341482 | -0.974780 |
| 1 | 0.186204  | -4.245360 | 0.154518  |
| 1 | -1.533188 | -4.100181 | 0.593218  |
| 1 | -0.401627 | -2.768702 | 0.950146  |
| 1 | 1.419840  | 1.033512  | 1.783116  |
| 1 | 3.018379  | 2.622048  | 0.039697  |
| 1 | 3.146954  | 0.866606  | 0.326653  |
| 1 | 3.646177  | 2.024077  | 1.592389  |
| 1 | -2.531606 | -0.135071 | -0.627843 |
| 1 | -4.116749 | -2.362238 | 0.269989  |
| 1 | -4.546500 | -1.288189 | -1.082810 |
| 1 | -4.481133 | -0.647915 | 0.583098  |
| 1 | 0.265517  | -0.753873 | 2.379858  |
| 1 | 3.077353  | -1.209615 | 2.045506  |
| 1 | 1.847270  | -1.636936 | 0.838345  |
| 1 | 1.887991  | -2.480679 | 2.413850  |
| 1 | 2.944441  | -1.328408 | -1.169039 |
| 1 | 5.268005  | 0.120772  | -1.916996 |
| 1 | 3.603841  | 0.697389  | -2.139811 |
| 1 | 4.187367  | -0.718091 | -3.050520 |

-----

Cartesian coordinates of : MeOH\_N9\_52.log

-----

Atomic number (AN) and Cartesian coordinates

| AN | X         | Y         | Z         |
|----|-----------|-----------|-----------|
| 6  | -0.612455 | 0.279052  | -2.203769 |
| 8  | 0.317153  | -0.324827 | -1.318306 |
| 8  | 0.070344  | -0.725262 | 1.375807  |
| 6  | -0.744971 | -0.095941 | 2.357370  |
| 8  | 2.568887  | 0.012716  | 1.627173  |
| 6  | 3.632732  | -0.839313 | 2.031607  |
| 8  | 2.542697  | 1.719742  | -0.485151 |
| 6  | 2.794911  | 1.799666  | -1.877798 |
| 8  | 0.049895  | 2.469728  | 0.182026  |
| 6  | 0.025882  | 3.592859  | 1.048974  |
| 8  | -2.456265 | 1.611364  | 0.143178  |
| 6  | -3.190206 | 2.337702  | -0.834647 |
| 8  | -3.305732 | -0.877691 | -0.169256 |
| 6  | -4.439137 | -1.179469 | 0.636948  |
| 8  | -1.431329 | -2.705696 | 0.269169  |
| 6  | -1.000878 | -3.372303 | -0.915457 |
| 8  | 2.960364  | -1.213224 | -1.115230 |
| 6  | 2.488843  | -2.492475 | -0.736020 |
| 1  | 0.035129  | -0.219733 | -0.389745 |
| 1  | -0.299685 | 0.034937  | -3.221138 |

|   |           |           |           |
|---|-----------|-----------|-----------|
| 1 | -0.624825 | 1.369705  | -2.086660 |
| 1 | -1.625280 | -0.110570 | -2.041102 |
| 1 | -0.701977 | -2.171516 | 0.644416  |
| 1 | -1.879382 | -3.845173 | -1.357469 |
| 1 | -0.264115 | -4.146392 | -0.678344 |
| 1 | -0.568028 | -2.661505 | -1.626727 |
| 1 | -0.849267 | 2.062112  | 0.154768  |
| 1 | 1.036119  | 4.005922  | 1.085551  |
| 1 | -0.273049 | 3.309706  | 2.064814  |
| 1 | -0.657268 | 4.365618  | 0.679580  |
| 1 | 1.027892  | -0.503999 | 1.534425  |
| 1 | -1.784232 | -0.359220 | 2.143696  |
| 1 | -0.641950 | 0.992576  | 2.308539  |
| 1 | -0.488886 | -0.445085 | 3.362317  |
| 1 | 2.778418  | 0.443772  | 0.770965  |
| 1 | 3.260256  | -1.473663 | 2.838234  |
| 1 | 4.477037  | -0.251299 | 2.405445  |
| 1 | 3.966956  | -1.467156 | 1.201304  |
| 1 | -2.624145 | -1.584050 | -0.041242 |
| 1 | -5.145079 | -0.352328 | 0.541883  |
| 1 | -4.162063 | -1.288124 | 1.691445  |
| 1 | -4.924544 | -2.099462 | 0.297169  |
| 1 | 1.600453  | 1.939538  | -0.314864 |
| 1 | 3.799581  | 1.413157  | -2.058307 |
| 1 | 2.744935  | 2.836520  | -2.229372 |
| 1 | 2.078549  | 1.196720  | -2.449018 |
| 1 | 2.173051  | -0.663894 | -1.278239 |
| 1 | 3.356672  | -3.112166 | -0.497275 |
| 1 | 1.927185  | -2.974547 | -1.544679 |
| 1 | 1.844847  | -2.437849 | 0.154468  |
| 1 | -2.720135 | 0.659247  | 0.083210  |
| 1 | -2.789867 | 3.353490  | -0.868522 |
| 1 | -4.251566 | 2.385419  | -0.570365 |
| 1 | -3.088183 | 1.885831  | -1.827686 |

-----

Cartesian coordinates of : MeOH\_N9\_6r.log

-----

Atomic number (AN) and Cartesian coordinates

| AN | X         | Y         | Z         |
|----|-----------|-----------|-----------|
| 6  | -0.021151 | -0.034642 | 0.095324  |
| 8  | 0.053095  | 0.086289  | 1.513830  |
| 8  | 2.520968  | 0.050096  | 2.381039  |
| 6  | 2.625574  | 0.800429  | 3.589635  |
| 8  | -1.409995 | -1.179439 | 3.380728  |
| 6  | -1.301281 | -0.160965 | 4.373412  |
| 8  | -0.680565 | -3.480925 | 4.390022  |
| 6  | -1.336192 | -4.582159 | 3.765746  |
| 8  | 1.920626  | -3.215818 | 5.013603  |
| 6  | 1.721043  | -2.317540 | 6.103502  |
| 8  | 3.646944  | -2.198027 | 3.330578  |
| 6  | 4.360283  | -3.201703 | 2.612150  |
| 8  | -1.968823 | -2.701938 | 6.749601  |
| 6  | -3.259331 | -2.669827 | 6.161800  |
| 8  | 5.068579  | -1.299507 | 5.567403  |
| 6  | 5.353890  | -2.604775 | 6.043769  |
| 8  | -0.053053 | 2.757683  | 2.340697  |
| 6  | 0.933230  | 3.193854  | 1.419379  |
| 1  | 0.241398  | -1.047079 | -0.225615 |
| 1  | 0.647973  | 0.683561  | -0.389307 |
| 1  | -1.048240 | 0.179570  | -0.203104 |
| 1  | 1.000226  | -0.009529 | 1.808103  |
| 1  | -2.028367 | 0.636528  | 4.190787  |

|   |           |           |          |
|---|-----------|-----------|----------|
| 1 | -0.293237 | 0.269599  | 4.385120 |
| 1 | -1.503136 | -0.616699 | 5.346376 |
| 1 | -0.961382 | -0.847258 | 2.572217 |
| 1 | -0.966169 | -4.731798 | 2.747119 |
| 1 | -2.418797 | -4.422292 | 3.737746 |
| 1 | -1.123999 | -5.473656 | 4.357387 |
| 1 | -0.928058 | -2.635823 | 3.924147 |
| 1 | 3.628577  | 1.225640  | 3.695259 |
| 1 | 2.409734  | 0.172107  | 4.461462 |
| 1 | 1.893077  | 1.610824  | 3.547157 |
| 1 | 2.955719  | -0.817110 | 2.537533 |
| 1 | 1.437740  | -2.864245 | 7.008416 |
| 1 | 0.940739  | -1.584047 | 5.869364 |
| 1 | 2.661919  | -1.790014 | 6.281074 |
| 1 | 1.031993  | -3.476360 | 4.685352 |
| 1 | 3.708746  | -3.705162 | 1.891766 |
| 1 | 4.781501  | -3.942769 | 3.299033 |
| 1 | 5.173947  | -2.711413 | 2.076099 |
| 1 | 2.949719  | -2.625787 | 3.899334 |
| 1 | 1.305480  | 4.161197  | 1.762379 |
| 1 | 0.519831  | 3.316490  | 0.410721 |
| 1 | 1.777710  | 2.493275  | 1.369904 |
| 1 | -0.258862 | 1.833567  | 2.115649 |
| 1 | -3.908029 | -2.080839 | 6.813114 |
| 1 | -3.684732 | -3.676088 | 6.062701 |
| 1 | -3.239882 | -2.197709 | 5.170258 |
| 1 | -1.368927 | -3.090043 | 6.088902 |
| 1 | 5.636321  | -2.521862 | 7.095118 |
| 1 | 6.184855  | -3.064085 | 5.494337 |
| 1 | 4.477436  | -3.262532 | 5.969126 |
| 1 | 4.667819  | -1.402957 | 4.686684 |

-----

Cartesian coordinates of : MeOH\_N9\_78.log

-----

Atomic number (AN) and Cartesian coordinates

| AN | X         | Y         | Z         |
|----|-----------|-----------|-----------|
| 6  | 1.754248  | 3.805003  | -0.876722 |
| 8  | 1.369137  | 2.434986  | -0.874251 |
| 8  | -0.975726 | 2.493088  | 0.356063  |
| 6  | -0.942297 | 2.746436  | 1.753532  |
| 8  | 2.947449  | 0.951024  | 0.671107  |
| 6  | 2.125765  | 0.893275  | 1.833699  |
| 8  | 3.682016  | -1.387706 | -0.378753 |
| 6  | 4.027300  | -1.071808 | -1.722228 |
| 8  | 1.687357  | -3.108790 | 0.021254  |
| 6  | 1.449346  | -2.966895 | 1.419565  |
| 8  | -0.367809 | -1.739851 | -0.890892 |
| 6  | 0.243378  | -0.526008 | -1.321022 |
| 8  | -3.051287 | -1.587682 | -1.074365 |
| 6  | -3.746956 | -2.647696 | -0.430327 |
| 8  | -3.111250 | 1.061044  | -0.479268 |
| 6  | -3.432832 | 1.625654  | -1.743367 |
| 8  | -1.180136 | -0.364787 | 1.439802  |
| 6  | -2.341869 | -0.688186 | 2.182479  |
| 1  | 0.482646  | 2.372413  | -0.435532 |
| 1  | 2.691079  | 3.888825  | -1.430147 |
| 1  | 1.911624  | 4.176612  | 0.142819  |
| 1  | 0.996308  | 4.422293  | -1.368960 |
| 1  | -1.047901 | -1.017480 | 0.730772  |
| 1  | -2.448348 | 0.066470  | 2.965486  |
| 1  | -2.261416 | -1.673812 | 2.657362  |
| 1  | -3.243681 | -0.666006 | 1.558234  |
| 1  | -2.106633 | -1.824841 | -1.161888 |

|   |           |           |           |
|---|-----------|-----------|-----------|
| 1 | -4.730971 | -2.272048 | -0.144359 |
| 1 | -3.221419 | -2.981136 | 0.471461  |
| 1 | -3.874307 | -3.499126 | -1.106126 |
| 1 | 3.438593  | -0.543462 | 0.075005  |
| 1 | 4.133272  | -2.008873 | -2.271644 |
| 1 | 4.976785  | -0.528521 | -1.763380 |
| 1 | 3.248699  | -0.467151 | -2.201426 |
| 1 | -1.662873 | 1.814779  | 0.165755  |
| 1 | -0.146244 | 3.471341  | 1.940413  |
| 1 | -0.735556 | 1.827960  | 2.310942  |
| 1 | -1.891991 | 3.174462  | 2.093022  |
| 1 | 2.459017  | -2.530850 | -0.201700 |
| 1 | 0.640442  | -3.647824 | 1.691374  |
| 1 | 1.143715  | -1.942250 | 1.667807  |
| 1 | 2.342083  | -3.227374 | 1.996273  |
| 1 | 0.351416  | -2.382861 | -0.661890 |
| 1 | -0.520855 | 0.256508  | -1.310720 |
| 1 | 0.646955  | -0.623563 | -2.333801 |
| 1 | 1.048421  | -0.234369 | -0.634932 |
| 1 | 2.461588  | 1.501286  | 0.008554  |
| 1 | 2.583076  | 0.189482  | 2.532746  |
| 1 | 1.110162  | 0.550681  | 1.593577  |
| 1 | 2.065764  | 1.876882  | 2.313445  |
| 1 | -3.105282 | 0.084598  | -0.574349 |
| 1 | -3.394671 | 2.711689  | -1.639557 |
| 1 | -4.439842 | 1.335935  | -2.061018 |
| 1 | -2.714155 | 1.320072  | -2.512856 |

-----  
Cartesian coordinates of : MeOH\_N9\_93.log

-----  
Atomic number (AN) and Cartesian coordinates

| AN | X         | Y         | Z         |
|----|-----------|-----------|-----------|
| 6  | 3.240796  | -0.110908 | 1.772798  |
| 8  | 3.181650  | -0.207976 | 0.353155  |
| 8  | 2.456263  | 1.984656  | -0.981490 |
| 6  | 3.442030  | 2.976370  | -0.715198 |
| 8  | 0.130032  | 2.693572  | 0.131927  |
| 6  | 0.273543  | 2.039620  | 1.387899  |
| 8  | -2.371642 | 2.515036  | -0.750504 |
| 6  | -3.024437 | 3.623338  | -0.141607 |
| 8  | -3.581214 | 0.250278  | -0.014874 |
| 6  | -3.034077 | 0.093204  | 1.290538  |
| 8  | -2.966776 | -2.067008 | -1.191339 |
| 6  | -3.398473 | -3.048428 | -0.252148 |
| 8  | -0.384701 | -1.662553 | -0.896233 |
| 6  | -0.218446 | -0.296735 | -1.270518 |
| 8  | 2.220722  | -2.442566 | -0.861139 |
| 6  | 2.736403  | -2.225093 | -2.172350 |
| 8  | 0.230485  | -1.489846 | 1.811857  |
| 6  | 0.936869  | -2.642448 | 2.243588  |
| 1  | 2.800778  | -1.069670 | 0.074544  |
| 1  | 3.629886  | 0.880460  | 2.015036  |
| 1  | 3.920432  | -0.864418 | 2.184602  |
| 1  | 2.247119  | -0.230341 | 2.214951  |
| 1  | -1.412411 | 2.556608  | -0.516288 |
| 1  | -4.095377 | 3.523306  | -0.327487 |
| 1  | -2.677354 | 4.567040  | -0.573809 |
| 1  | -2.854021 | 3.640997  | 0.940971  |
| 1  | -3.265455 | -1.181355 | -0.868296 |
| 1  | -3.220088 | -4.031156 | -0.690806 |
| 1  | -4.466765 | -2.942365 | -0.041516 |
| 1  | -2.837876 | -2.971547 | 0.687868  |
| 1  | 1.245579  | -2.398617 | -0.907976 |



|   |           |           |           |
|---|-----------|-----------|-----------|
| 1 | 3.824839  | -2.252036 | -2.104354 |
| 1 | 2.429779  | -1.247465 | -2.563149 |
| 1 | 2.402868  | -3.008077 | -2.859455 |
| 1 | 2.716933  | 1.154153  | -0.514676 |
| 1 | 3.187300  | 3.863871  | -1.296606 |
| 1 | 4.435548  | 2.629936  | -1.016156 |
| 1 | 3.461921  | 3.243852  | 0.347832  |
| 1 | -3.168473 | 1.057630  | -0.405570 |
| 1 | -3.638764 | -0.643367 | 1.823600  |
| 1 | -3.064927 | 1.038859  | 1.841855  |
| 1 | -1.995548 | -0.263517 | 1.254248  |
| 1 | -1.323850 | -1.926533 | -1.087558 |
| 1 | 0.776171  | 0.018541  | -0.941707 |
| 1 | -0.963606 | 0.338076  | -0.777680 |
| 1 | -0.295739 | -0.171579 | -2.355040 |
| 1 | -0.061396 | -1.631124 | 0.892200  |
| 1 | 1.278138  | -2.456707 | 3.264311  |
| 1 | 1.812491  | -2.841078 | 1.612619  |
| 1 | 0.295848  | -3.532060 | 2.247266  |
| 1 | 0.932030  | 2.481810  | -0.402168 |
| 1 | -0.611345 | 2.269277  | 1.986412  |
| 1 | 1.160434  | 2.406048  | 1.917519  |
| 1 | 0.351100  | 0.950298  | 1.275584  |

-----

Cartesian coordinates of the methanol decamer

Cartesian coordinates of : MeOH\_N10\_0.log

-----

Atomic number (AN) and Cartesian coordinates

| AN | X         | Y         | Z         |
|----|-----------|-----------|-----------|
| 8  | -2.624227 | -2.344409 | 0.089790  |
| 1  | -1.885703 | -2.238664 | 0.729027  |
| 6  | -2.275381 | -3.257664 | -0.944668 |
| 1  | -3.136789 | -3.342914 | -1.609168 |
| 1  | -2.046664 | -4.246335 | -0.534026 |
| 1  | -1.412716 | -2.906926 | -1.525862 |
| 8  | 1.937707  | 2.064486  | -1.390525 |
| 1  | 1.226251  | 2.501431  | -0.847881 |
| 6  | 2.763780  | 3.059461  | -1.990912 |
| 1  | 3.570570  | 2.547412  | -2.517337 |
| 1  | 3.194719  | 3.717620  | -1.230288 |
| 1  | 2.192413  | 3.656415  | -2.707176 |
| 8  | -0.909461 | -1.509851 | 1.989674  |
| 1  | 0.055493  | -1.319490 | 1.965460  |
| 6  | -1.581221 | -0.283070 | 2.242856  |
| 1  | -2.644841 | -0.502809 | 2.367220  |
| 1  | -1.464636 | 0.419219  | 1.405481  |
| 1  | -1.208754 | 0.191149  | 3.157411  |
| 8  | -2.419087 | 2.408886  | 0.137059  |
| 1  | -2.781489 | 1.539033  | -0.156657 |
| 6  | -3.142986 | 2.859355  | 1.274772  |
| 1  | -2.771376 | 3.853121  | 1.532317  |
| 1  | -2.993585 | 2.193700  | 2.133415  |
| 1  | -4.213003 | 2.927853  | 1.056555  |
| 8  | 1.258237  | -2.968874 | -1.793380 |
| 1  | 1.078250  | -2.052206 | -2.071469 |
| 6  | 1.325173  | -2.978622 | -0.379214 |
| 1  | 1.926585  | -3.836549 | -0.068511 |
| 1  | 0.329368  | -3.071919 | 0.078078  |
| 1  | 1.789524  | -2.063478 | 0.007854  |
| 8  | 0.651749  | -0.287797 | -2.068066 |

|   |           |           |           |
|---|-----------|-----------|-----------|
| 1 | 1.241806  | 0.480573  | -2.167122 |
| 6 | -0.163390 | -0.030005 | -0.934373 |
| 1 | -0.802048 | -0.901713 | -0.770255 |
| 1 | -0.802811 | 0.844876  | -1.095739 |
| 1 | 0.445867  | 0.123975  | -0.032891 |
| 8 | -3.480708 | 0.100344  | -0.719595 |
| 1 | -3.211854 | -0.768636 | -0.345177 |
| 6 | -3.463087 | -0.010555 | -2.138274 |
| 1 | -3.625809 | 0.986348  | -2.552444 |
| 1 | -4.260007 | -0.674273 | -2.488382 |
| 1 | -2.497616 | -0.387703 | -2.497010 |
| 8 | 3.171344  | 0.249408  | 0.211723  |
| 1 | 2.762527  | 0.969379  | -0.317107 |
| 6 | 3.912780  | -0.590825 | -0.667405 |
| 1 | 4.306858  | -1.421994 | -0.078997 |
| 1 | 4.750526  | -0.044187 | -1.111727 |
| 1 | 3.276339  | -0.993223 | -1.464005 |
| 8 | 0.168978  | 3.098439  | 0.255015  |
| 1 | -0.771316 | 2.823030  | 0.140850  |
| 6 | 0.604021  | 2.707678  | 1.553631  |
| 1 | 1.588579  | 3.149156  | 1.720471  |
| 1 | 0.687607  | 1.617206  | 1.643175  |
| 1 | -0.084228 | 3.073699  | 2.322446  |
| 8 | 1.663200  | -0.741285 | 2.218595  |
| 1 | 2.194049  | -0.371308 | 1.476743  |
| 6 | 2.464460  | -1.681497 | 2.924963  |
| 1 | 1.870783  | -2.063303 | 3.757352  |
| 1 | 3.366690  | -1.205975 | 3.321919  |
| 1 | 2.753688  | -2.521885 | 2.282897  |

-----

Cartesian coordinates of : MeOH\_N10\_100.log

-----

Atomic number (AN) and Cartesian coordinates

| AN | X         | Y         | Z         |
|----|-----------|-----------|-----------|
| 8  | 3.512296  | -0.143279 | 0.048873  |
| 1  | 2.928070  | -0.745711 | 0.553782  |
| 6  | 4.047689  | -0.882128 | -1.045475 |
| 1  | 4.496027  | -0.169492 | -1.740309 |
| 1  | 3.261613  | -1.439845 | -1.568879 |
| 1  | 4.819171  | -1.580169 | -0.705260 |
| 8  | -2.472121 | 1.559664  | 1.600950  |
| 1  | -2.634586 | 1.014992  | 0.795748  |
| 6  | -3.584797 | 1.413395  | 2.476060  |
| 1  | -3.400154 | 2.034408  | 3.354113  |
| 1  | -3.707457 | 0.373206  | 2.797639  |
| 1  | -4.506956 | 1.749553  | 1.992019  |
| 8  | 1.827184  | -2.069773 | 0.961933  |
| 1  | 1.164193  | -1.895440 | 1.687496  |
| 6  | 2.431673  | -3.348678 | 1.162567  |
| 1  | 3.051491  | -3.563334 | 0.290254  |
| 1  | 1.666872  | -4.125047 | 1.256720  |
| 1  | 3.059916  | -3.342885 | 2.057283  |
| 8  | 0.077074  | 2.565723  | -2.135712 |
| 1  | 0.960058  | 2.341488  | -1.784282 |
| 6  | -0.717097 | 2.956548  | -1.032177 |
| 1  | -1.628241 | 3.421917  | -1.415715 |
| 1  | -0.197684 | 3.683486  | -0.394519 |
| 1  | -1.006229 | 2.096604  | -0.411243 |
| 8  | 2.472052  | 2.163872  | -0.860964 |
| 1  | 2.848439  | 1.341625  | -0.474660 |
| 6  | 3.136247  | 3.301202  | -0.333872 |
| 1  | 2.666444  | 4.187579  | -0.765609 |
| 1  | 4.198620  | 3.301304  | -0.600463 |

|   |           |           |           |
|---|-----------|-----------|-----------|
| 1 | 3.042097  | 3.350480  | 0.757135  |
| 8 | -0.091202 | 1.048219  | 2.723210  |
| 1 | -0.974802 | 1.280593  | 2.345430  |
| 6 | 0.891673  | 1.289364  | 1.723591  |
| 1 | 1.873272  | 1.079037  | 2.156389  |
| 1 | 0.869005  | 2.329067  | 1.384003  |
| 1 | 0.746936  | 0.638555  | 0.848180  |
| 8 | 0.479434  | -1.882129 | -1.421606 |
| 1 | 0.947629  | -1.987769 | -0.565495 |
| 6 | 0.402223  | -0.495625 | -1.741755 |
| 1 | 0.098661  | -0.408690 | -2.786876 |
| 1 | 1.372111  | -0.003081 | -1.613949 |
| 1 | -0.343199 | 0.021201  | -1.120233 |
| 8 | -0.144579 | -1.604162 | 2.602191  |
| 1 | -0.107304 | -0.652615 | 2.866693  |
| 6 | -1.203942 | -1.721750 | 1.655814  |
| 1 | -1.184038 | -2.734810 | 1.249504  |
| 1 | -1.074707 | -1.006001 | 0.831623  |
| 1 | -2.176568 | -1.544709 | 2.126035  |
| 8 | -3.064849 | 0.106916  | -0.579780 |
| 1 | -2.742672 | -0.806761 | -0.761885 |
| 6 | -3.197899 | 0.795859  | -1.817522 |
| 1 | -3.607523 | 1.784993  | -1.603173 |
| 1 | -3.886071 | 0.268258  | -2.486125 |
| 1 | -2.227048 | 0.917922  | -2.313934 |
| 8 | -2.169286 | -2.333032 | -1.290000 |
| 1 | -1.184687 | -2.320244 | -1.301614 |
| 6 | -2.634787 | -2.643732 | -2.599634 |
| 1 | -3.724174 | -2.576825 | -2.587978 |
| 1 | -2.346542 | -3.659610 | -2.886247 |
| 1 | -2.243903 | -1.936104 | -3.339933 |

-----

Cartesian coordinates of : MeOH\_N10\_101.log

-----

Atomic number (AN) and Cartesian coordinates

| AN | X         | Y         | Z         |
|----|-----------|-----------|-----------|
| 8  | -1.177694 | -1.082875 | -2.095539 |
| 1  | -0.580411 | -1.688518 | -1.596834 |
| 6  | -0.450851 | 0.100998  | -2.398762 |
| 1  | -1.125979 | 0.785616  | -2.916299 |
| 1  | 0.400950  | -0.117944 | -3.051408 |
| 1  | -0.085143 | 0.590399  | -1.486324 |
| 8  | 1.485790  | 2.728048  | -1.278289 |
| 1  | 0.720300  | 2.589632  | -0.669263 |
| 6  | 1.936560  | 4.068709  | -1.113045 |
| 1  | 2.782603  | 4.220922  | -1.785295 |
| 1  | 2.262313  | 4.253970  | -0.083510 |
| 1  | 1.145357  | 4.778993  | -1.372674 |
| 8  | 0.552635  | -2.697884 | -0.834865 |
| 1  | 1.134723  | -2.493784 | -0.063650 |
| 6  | 1.316692  | -3.434020 | -1.781947 |
| 1  | 0.664310  | -3.669394 | -2.625055 |
| 1  | 1.684307  | -4.368540 | -1.346642 |
| 1  | 2.169376  | -2.850407 | -2.148195 |
| 8  | -3.533913 | -0.071529 | 1.667044  |
| 1  | -3.534562 | -0.326611 | 0.713113  |
| 6  | -4.567002 | 0.883021  | 1.875848  |
| 1  | -4.506214 | 1.220506  | 2.911765  |
| 1  | -5.551990 | 0.435468  | 1.707653  |
| 1  | -4.450261 | 1.748421  | 1.214189  |
| 8  | 3.449546  | 0.982226  | -0.854379 |
| 1  | 2.732348  | 1.642961  | -1.025605 |
| 6  | 3.094995  | -0.234458 | -1.500389 |

|   |           |           |           |
|---|-----------|-----------|-----------|
| 1 | 3.875937  | -0.967567 | -1.285456 |
| 1 | 3.024108  | -0.100134 | -2.585026 |
| 1 | 2.137848  | -0.622766 | -1.125396 |
| 8 | -0.611200 | 2.564141  | 0.346558  |
| 1 | -0.674028 | 1.903004  | 1.077925  |
| 6 | -1.857214 | 2.561347  | -0.340988 |
| 1 | -1.696238 | 2.976318  | -1.339001 |
| 1 | -2.592696 | 3.178954  | 0.184858  |
| 1 | -2.252739 | 1.542202  | -0.443647 |
| 8 | -3.555591 | -0.629594 | -0.951449 |
| 1 | -2.680386 | -0.799272 | -1.376377 |
| 6 | -4.455273 | -1.667456 | -1.324081 |
| 1 | -5.403839 | -1.482484 | -0.816533 |
| 1 | -4.077578 | -2.649684 | -1.021127 |
| 1 | -4.627217 | -1.664828 | -2.404873 |
| 8 | 3.145068  | 0.189401  | 1.659472  |
| 1 | 3.395295  | 0.560670  | 0.778733  |
| 6 | 2.303869  | 1.130547  | 2.315862  |
| 1 | 1.649566  | 0.591592  | 3.004890  |
| 1 | 1.675982  | 1.669739  | 1.594967  |
| 1 | 2.899360  | 1.856754  | 2.878313  |
| 8 | -0.949611 | 0.526522  | 2.013838  |
| 1 | -1.925356 | 0.389243  | 2.061260  |
| 6 | -0.431238 | -0.539612 | 1.226512  |
| 1 | 0.530976  | -0.225372 | 0.807320  |
| 1 | -1.108717 | -0.783042 | 0.399311  |
| 1 | -0.270029 | -1.438067 | 1.832000  |
| 8 | 2.319066  | -2.310573 | 1.128021  |
| 1 | 2.614671  | -1.394833 | 1.347060  |
| 6 | 2.160661  | -3.051965 | 2.330027  |
| 1 | 1.725017  | -4.018657 | 2.069729  |
| 1 | 1.491212  | -2.540340 | 3.030874  |
| 1 | 3.126848  | -3.218841 | 2.816729  |

-----

Cartesian coordinates of : MeOH\_N10\_103.log

-----

Atomic number (AN) and Cartesian coordinates

| AN | X         | Y         | Z         |
|----|-----------|-----------|-----------|
| 8  | -3.304966 | 0.050801  | 0.196700  |
| 1  | -2.976649 | -0.040009 | -0.721913 |
| 6  | -3.389995 | 1.434809  | 0.517493  |
| 1  | -3.574668 | 1.516398  | 1.590563  |
| 1  | -4.215351 | 1.910420  | -0.021571 |
| 1  | -2.456156 | 1.958044  | 0.281757  |
| 8  | 0.124696  | 3.455626  | 0.743677  |
| 1  | -0.129523 | 2.819712  | 0.047892  |
| 6  | 0.788709  | 4.532658  | 0.106117  |
| 1  | 1.127827  | 5.222260  | 0.881981  |
| 1  | 0.123174  | 5.075248  | -0.575977 |
| 1  | 1.665597  | 4.190743  | -0.459642 |
| 8  | 2.211746  | -1.451530 | 0.940299  |
| 1  | 1.384754  | -1.232686 | 1.452304  |
| 6  | 3.101330  | -2.180038 | 1.786567  |
| 1  | 3.987843  | -2.427503 | 1.199745  |
| 1  | 2.634935  | -3.104877 | 2.137693  |
| 1  | 3.400275  | -1.572149 | 2.646078  |
| 8  | 1.957204  | -2.274650 | -1.633501 |
| 1  | 2.016615  | -2.086945 | -0.672079 |
| 6  | 3.043711  | -1.620712 | -2.279458 |
| 1  | 2.840287  | -1.613197 | -3.351799 |
| 1  | 3.981972  | -2.156717 | -2.100620 |
| 1  | 3.153513  | -0.587854 | -1.929027 |
| 8  | -2.133779 | 0.001829  | -2.277447 |

|   |           |           |           |
|---|-----------|-----------|-----------|
| 1 | -1.586133 | -0.822281 | -2.365284 |
| 6 | -2.863193 | 0.259921  | -3.476582 |
| 1 | -3.477968 | 1.143809  | -3.302328 |
| 1 | -3.511355 | -0.584954 | -3.723989 |
| 1 | -2.181461 | 0.455347  | -4.308959 |
| 8 | -2.381283 | -1.647888 | 2.077033  |
| 1 | -2.723297 | -1.054648 | 1.368562  |
| 6 | -3.132519 | -1.414525 | 3.263861  |
| 1 | -2.807041 | -2.140195 | 4.010597  |
| 1 | -4.202814 | -1.550476 | 3.081119  |
| 1 | -2.960360 | -0.404423 | 3.653837  |
| 8 | -0.703490 | -2.180031 | -2.003810 |
| 1 | 0.274608  | -2.142284 | -2.097239 |
| 6 | -0.972373 | -2.309187 | -0.610913 |
| 1 | -2.033674 | -2.534989 | -0.490632 |
| 1 | -0.747334 | -1.374771 | -0.077441 |
| 1 | -0.384698 | -3.119950 | -0.168171 |
| 8 | 3.751086  | 0.777513  | 0.184434  |
| 1 | 3.174384  | 0.020176  | 0.393634  |
| 6 | 3.380325  | 1.851253  | 1.032828  |
| 1 | 4.093733  | 2.662738  | 0.873260  |
| 1 | 3.415050  | 1.561474  | 2.090948  |
| 1 | 2.372408  | 2.225140  | 0.805532  |
| 8 | 0.114081  | -0.729336 | 2.332032  |
| 1 | -0.730686 | -1.237053 | 2.286368  |
| 6 | -0.194173 | 0.614590  | 1.972039  |
| 1 | 0.732946  | 1.189142  | 1.972883  |
| 1 | -0.889110 | 1.064371  | 2.689570  |
| 1 | -0.637832 | 0.666729  | 0.968139  |
| 8 | -0.239324 | 1.760785  | -1.389186 |
| 1 | -1.012331 | 1.248117  | -1.701364 |
| 6 | 0.908254  | 0.931063  | -1.501762 |
| 1 | 1.796705  | 1.559948  | -1.406798 |
| 1 | 0.933842  | 0.424011  | -2.473382 |
| 1 | 0.939746  | 0.170190  | -0.707229 |

-----

Cartesian coordinates of : MeOH\_N10\_104.log

-----

Atomic number (AN) and Cartesian coordinates

| AN | X         | Y         | Z         |
|----|-----------|-----------|-----------|
| 8  | -1.048103 | 1.801411  | 1.154560  |
| 1  | -1.790528 | 1.508067  | 0.569815  |
| 6  | -1.546706 | 2.763698  | 2.075275  |
| 1  | -0.707462 | 3.105150  | 2.685150  |
| 1  | -2.306845 | 2.325909  | 2.731588  |
| 1  | -1.975875 | 3.624129  | 1.550483  |
| 8  | -3.412513 | -1.331530 | -1.003029 |
| 1  | -2.720974 | -1.651996 | -0.387927 |
| 6  | -3.591378 | -2.226446 | -2.090287 |
| 1  | -4.318323 | -1.777719 | -2.768811 |
| 1  | -3.978597 | -3.190499 | -1.745302 |
| 1  | -2.655229 | -2.391259 | -2.634884 |
| 8  | 0.734594  | 0.106912  | 2.429880  |
| 1  | 0.053807  | 0.648936  | 1.987549  |
| 6  | 1.980850  | 0.393352  | 1.818909  |
| 1  | 2.618821  | -0.493126 | 1.894181  |
| 1  | 2.489418  | 1.230235  | 2.316430  |
| 1  | 1.849256  | 0.626925  | 0.756196  |
| 8  | 2.690278  | 0.796323  | -1.652420 |
| 1  | 1.977422  | 1.415504  | -1.382600 |
| 6  | 3.922871  | 1.346547  | -1.207407 |
| 1  | 4.717809  | 0.651770  | -1.485542 |
| 1  | 3.932562  | 1.474628  | -0.117480 |

|   |           |           |           |
|---|-----------|-----------|-----------|
| 1 | 4.117158  | 2.314606  | -1.681006 |
| 8 | -1.552490 | -1.475513 | 0.924624  |
| 1 | -0.731660 | -2.021302 | 1.067945  |
| 6 | -2.197340 | -1.158400 | 2.152575  |
| 1 | -2.984375 | -0.432113 | 1.933176  |
| 1 | -1.490065 | -0.716738 | 2.860257  |
| 1 | -2.651307 | -2.050378 | 2.596636  |
| 8 | -3.012579 | 1.318399  | -0.580149 |
| 1 | -3.182819 | 0.389033  | -0.847246 |
| 6 | -2.545197 | 2.055895  | -1.706109 |
| 1 | -2.419822 | 3.093493  | -1.387980 |
| 1 | -3.271336 | 2.022879  | -2.524025 |
| 1 | -1.578209 | 1.674207  | -2.051625 |
| 8 | 0.915581  | 2.695649  | -0.772413 |
| 1 | 0.231347  | 2.113765  | -0.393681 |
| 6 | 1.264987  | 3.664811  | 0.203903  |
| 1 | 2.096719  | 4.249813  | -0.192998 |
| 1 | 1.578327  | 3.191847  | 1.142052  |
| 1 | 0.424102  | 4.336680  | 0.409208  |
| 8 | 2.562769  | -1.676186 | -0.556289 |
| 1 | 2.449854  | -0.756558 | -0.890205 |
| 6 | 2.980469  | -2.499705 | -1.634777 |
| 1 | 3.174436  | -3.497192 | -1.235286 |
| 1 | 3.900910  | -2.115601 | -2.087291 |
| 1 | 2.206791  | -2.573618 | -2.407991 |
| 8 | -0.050793 | 0.084366  | -0.788485 |
| 1 | -0.611063 | -0.272497 | -0.073401 |
| 6 | -0.187396 | -0.766294 | -1.912067 |
| 1 | 0.633440  | -0.543705 | -2.599342 |
| 1 | -1.141420 | -0.598482 | -2.429836 |
| 1 | -0.123560 | -1.824133 | -1.623288 |
| 8 | 0.692689  | -2.834764 | 0.958650  |
| 1 | 1.322006  | -2.312385 | 0.402987  |
| 6 | 1.307889  | -3.095667 | 2.215964  |
| 1 | 0.732445  | -3.879878 | 2.712313  |
| 1 | 1.308384  | -2.196007 | 2.840031  |
| 1 | 2.334697  | -3.449663 | 2.076443  |

-----

Cartesian coordinates of : MeOH\_N10\_10.log

-----

Atomic number (AN) and Cartesian coordinates

| AN | X         | Y         | Z         |
|----|-----------|-----------|-----------|
| 8  | 0.952946  | -2.745858 | 0.642727  |
| 1  | 1.678552  | -2.333267 | 0.121385  |
| 6  | 1.425333  | -3.254587 | 1.880795  |
| 1  | 0.583043  | -3.736626 | 2.380802  |
| 1  | 1.801186  | -2.451219 | 2.525861  |
| 1  | 2.218200  | -3.993693 | 1.730335  |
| 8  | -2.514110 | 1.632378  | -2.569135 |
| 1  | -1.561468 | 1.440138  | -2.509146 |
| 6  | -2.845407 | 2.476973  | -1.482420 |
| 1  | -3.920610 | 2.664939  | -1.522103 |
| 1  | -2.319448 | 3.438063  | -1.537557 |
| 1  | -2.614284 | 2.008602  | -0.514074 |
| 8  | 2.687054  | 1.169023  | -1.107197 |
| 1  | 2.628381  | 1.487200  | -0.165647 |
| 6  | 3.806671  | 1.766900  | -1.758340 |
| 1  | 3.868124  | 1.345700  | -2.762844 |
| 1  | 4.732813  | 1.544412  | -1.220099 |
| 1  | 3.679561  | 2.850516  | -1.832100 |
| 8  | 0.070281  | 2.625928  | 2.062211  |
| 1  | -0.619920 | 1.929033  | 2.163509  |
| 6  | -0.301413 | 3.503095  | 1.003492  |

|   |           |           |           |
|---|-----------|-----------|-----------|
| 1 | 0.396076  | 4.342414  | 1.009713  |
| 1 | -1.316460 | 3.885504  | 1.150077  |
| 1 | -0.245074 | 3.001906  | 0.028488  |
| 8 | -3.282146 | -0.807971 | 0.746915  |
| 1 | -2.687385 | -1.543542 | 0.474741  |
| 6 | -4.139950 | -0.499710 | -0.346109 |
| 1 | -4.792911 | 0.318087  | -0.034976 |
| 1 | -4.760189 | -1.363103 | -0.610009 |
| 1 | -3.570753 | -0.177209 | -1.227050 |
| 8 | -1.676582 | 0.601508  | 2.405252  |
| 1 | -2.358640 | 0.328791  | 1.755321  |
| 6 | -0.935186 | -0.570028 | 2.728892  |
| 1 | -0.156474 | -0.285920 | 3.440510  |
| 1 | -0.459989 | -1.005334 | 1.839026  |
| 1 | -1.578966 | -1.324693 | 3.192919  |
| 8 | 2.692894  | -1.574151 | -1.052112 |
| 1 | 2.782345  | -0.599151 | -0.993122 |
| 6 | 2.184976  | -1.882042 | -2.347975 |
| 1 | 1.950118  | -2.948001 | -2.366617 |
| 1 | 2.930601  | -1.668944 | -3.120326 |
| 1 | 1.272770  | -1.311704 | -2.562422 |
| 8 | 0.033942  | 0.956294  | -1.788335 |
| 1 | 0.981033  | 1.190395  | -1.804525 |
| 6 | -0.206245 | 0.256326  | -0.577113 |
| 1 | -1.284662 | 0.089141  | -0.490475 |
| 1 | 0.124635  | 0.835081  | 0.294520  |
| 1 | 0.299053  | -0.716323 | -0.566207 |
| 8 | -1.636299 | -2.748064 | -0.181946 |
| 1 | -0.715212 | -2.742349 | 0.157433  |
| 6 | -1.596692 | -2.773272 | -1.603828 |
| 1 | -2.604034 | -2.995003 | -1.961124 |
| 1 | -0.915380 | -3.551507 | -1.962154 |
| 1 | -1.282317 | -1.805361 | -2.015570 |
| 8 | 2.488475  | 1.641657  | 1.460556  |
| 1 | 1.618345  | 2.020898  | 1.738934  |
| 6 | 2.580355  | 0.304894  | 1.942165  |
| 1 | 3.558164  | -0.087506 | 1.653619  |
| 1 | 1.801146  | -0.330637 | 1.499334  |
| 1 | 2.493743  | 0.273020  | 3.032775  |

-----

Cartesian coordinates of : MeOH\_N10\_10r.log

-----

Atomic number (AN) and Cartesian coordinates

| AN | X         | Y        | Z         |
|----|-----------|----------|-----------|
| 6  | -2.044296 | 3.401647 | 2.485083  |
| 1  | -2.968623 | 3.045870 | 2.943709  |
| 1  | -2.240824 | 4.361291 | 1.992972  |
| 1  | -1.294603 | 3.548932 | 3.268698  |
| 8  | -1.615848 | 2.417827 | 1.551265  |
| 1  | -0.785179 | 2.742678 | 1.127944  |
| 6  | 0.167559  | 4.522153 | -0.532046 |
| 1  | 0.135294  | 4.029685 | -1.509819 |
| 1  | 0.879022  | 5.353823 | -0.573482 |
| 1  | -0.824345 | 4.921022 | -0.306503 |
| 8  | 0.512988  | 3.607786 | 0.498736  |
| 1  | 1.385865  | 3.205227 | 0.276297  |
| 6  | 3.938484  | 3.613215 | 0.394692  |
| 1  | 4.846380  | 3.677917 | -0.214323 |
| 1  | 4.192506  | 3.192265 | 1.373216  |
| 1  | 3.539842  | 4.619988 | 0.537192  |
| 8  | 2.940756  | 2.840867 | -0.259310 |
| 1  | 3.283022  | 1.922587 | -0.369838 |
| 6  | 4.838581  | 0.506243 | -1.869119 |

|   |           |           |           |
|---|-----------|-----------|-----------|
| 1 | 4.146466  | 0.197493  | -2.659656 |
| 1 | 5.702908  | -0.166376 | -1.866851 |
| 1 | 5.184876  | 1.520219  | -2.080636 |
| 8 | 4.201813  | 0.521397  | -0.598565 |
| 1 | 3.863226  | -0.386335 | -0.414952 |
| 6 | 4.661749  | -2.727242 | 0.334255  |
| 1 | 4.681461  | -3.788100 | 0.063047  |
| 1 | 4.587345  | -2.637029 | 1.423124  |
| 1 | 5.595300  | -2.264974 | 0.006070  |
| 8 | 3.592092  | -2.054778 | -0.316527 |
| 1 | 2.744706  | -2.448581 | -0.000652 |
| 6 | 1.187369  | -4.493497 | -0.308719 |
| 1 | 0.561480  | -5.245933 | 0.183715  |
| 1 | 2.127816  | -4.962048 | -0.606303 |
| 1 | 0.673915  | -4.132902 | -1.206985 |
| 8 | 1.492809  | -3.427052 | 0.579134  |
| 1 | 0.640352  | -3.056103 | 0.912870  |
| 6 | -1.319176 | -3.755680 | 2.397422  |
| 1 | -2.143092 | -3.413948 | 3.032042  |
| 1 | -0.471426 | -4.020110 | 3.032869  |
| 1 | -1.638959 | -4.647958 | 1.846947  |
| 8 | -0.896317 | -2.725513 | 1.513001  |
| 1 | -1.617314 | -2.576313 | 0.853144  |
| 6 | -2.563201 | -3.478629 | -1.335103 |
| 1 | -3.456995 | -3.736131 | -1.913028 |
| 1 | -2.125132 | -4.398520 | -0.940303 |
| 1 | -1.834848 | -2.997091 | -1.996935 |
| 8 | -2.891966 | -2.645695 | -0.231495 |
| 1 | -3.249175 | -1.790946 | -0.579491 |
| 6 | -5.320070 | -0.560491 | -1.461067 |
| 1 | -5.541463 | -1.526415 | -1.919496 |
| 1 | -5.715569 | 0.232224  | -2.104594 |
| 1 | -5.815241 | -0.510565 | -0.485329 |
| 8 | -3.908048 | -0.453023 | -1.331981 |
| 1 | -3.703315 | 0.408509  | -0.890795 |
| 6 | -3.422688 | 2.966845  | -1.142525 |
| 1 | -4.232170 | 2.868851  | -1.868558 |
| 1 | -2.464812 | 2.902565  | -1.670895 |
| 1 | -3.500752 | 3.947182  | -0.659893 |
| 8 | -3.560612 | 1.920615  | -0.190078 |
| 1 | -2.835139 | 2.021224  | 0.474792  |

-----

Cartesian coordinates of : MeOH\_N10\_114.log

-----

Atomic number (AN) and Cartesian coordinates

| AN | X         | Y         | Z         |
|----|-----------|-----------|-----------|
| 8  | 2.835250  | 2.070898  | 0.846476  |
| 1  | 1.871341  | 2.071817  | 1.067011  |
| 6  | 3.563471  | 2.290912  | 2.050421  |
| 1  | 4.626416  | 2.219486  | 1.813727  |
| 1  | 3.315956  | 1.537626  | 2.806540  |
| 1  | 3.356327  | 3.286652  | 2.453803  |
| 8  | -2.799085 | -1.459688 | 0.816059  |
| 1  | -1.914229 | -1.840874 | 0.992195  |
| 6  | -3.250418 | -0.779679 | 1.978794  |
| 1  | -4.336292 | -0.686193 | 1.913758  |
| 1  | -2.818462 | 0.227363  | 2.047972  |
| 1  | -2.998453 | -1.334607 | 2.888852  |
| 8  | 0.500821  | 0.819424  | -2.839878 |
| 1  | 0.005732  | -0.007599 | -2.705728 |
| 6  | 0.581562  | 1.428403  | -1.562951 |
| 1  | 1.094284  | 2.386941  | -1.675032 |
| 1  | 1.152679  | 0.809911  | -0.856550 |



|   |           |           |           |
|---|-----------|-----------|-----------|
| 1 | -0.414426 | 1.600494  | -1.131474 |
| 8 | -1.972701 | 2.731894  | 0.732748  |
| 1 | -2.390154 | 1.998340  | 0.217789  |
| 6 | -1.967408 | 3.904317  | -0.072653 |
| 1 | -1.498660 | 4.703481  | 0.503834  |
| 1 | -2.988177 | 4.205831  | -0.328690 |
| 1 | -1.395754 | 3.753473  | -0.996093 |
| 8 | -0.420842 | -2.672888 | 1.436536  |
| 1 | 0.400039  | -2.448562 | 0.954289  |
| 6 | -0.120108 | -3.059173 | 2.770818  |
| 1 | -1.059436 | -3.336780 | 3.251878  |
| 1 | 0.336058  | -2.236285 | 3.332651  |
| 1 | 0.552351  | -3.922552 | 2.788344  |
| 8 | 3.472372  | -0.238467 | -0.269862 |
| 1 | 3.235396  | 0.622990  | 0.164593  |
| 6 | 3.836327  | 0.024266  | -1.624607 |
| 1 | 4.307036  | -0.876399 | -2.023839 |
| 1 | 4.553303  | 0.848759  | -1.676225 |
| 1 | 2.956462  | 0.269335  | -2.231483 |
| 8 | 0.333252  | 1.759715  | 1.651750  |
| 1 | -0.479680 | 2.224616  | 1.337028  |
| 6 | 0.074488  | 0.362404  | 1.634791  |
| 1 | 1.035729  | -0.161479 | 1.582811  |
| 1 | -0.526807 | 0.076459  | 0.761337  |
| 1 | -0.443899 | 0.043700  | 2.546517  |
| 8 | 1.547049  | -1.992386 | -0.306913 |
| 1 | 2.260703  | -1.295348 | -0.231067 |
| 6 | 2.028768  | -3.054593 | -1.129253 |
| 1 | 1.337959  | -3.894666 | -1.029998 |
| 1 | 3.024241  | -3.372748 | -0.806643 |
| 1 | 2.067397  | -2.744964 | -2.179445 |
| 8 | -3.048017 | 0.768642  | -0.716560 |
| 1 | -2.753081 | -0.126169 | -0.442592 |
| 6 | -3.038784 | 0.902632  | -2.131418 |
| 1 | -3.379749 | 1.913496  | -2.365235 |
| 1 | -3.725882 | 0.186907  | -2.595135 |
| 1 | -2.034805 | 0.757491  | -2.540219 |
| 8 | -0.816932 | -1.210097 | -1.484058 |
| 1 | 0.017598  | -1.427458 | -1.019314 |
| 6 | -1.455202 | -2.425999 | -1.855685 |
| 1 | -2.445243 | -2.173411 | -2.241708 |
| 1 | -1.575657 | -3.086940 | -0.990366 |
| 1 | -0.893673 | -2.949446 | -2.638030 |

-----  
 Cartesian coordinates of : MeOH\_N10\_146.log

-----  
 Atomic number (AN) and Cartesian coordinates

| AN | X         | Y         | Z         |
|----|-----------|-----------|-----------|
| 8  | -3.935998 | -0.972406 | 0.301658  |
| 1  | -3.152689 | -1.480869 | -0.012361 |
| 6  | -5.073567 | -1.406359 | -0.433221 |
| 1  | -5.918282 | -0.780744 | -0.138545 |
| 1  | -5.313336 | -2.450865 | -0.208709 |
| 1  | -4.916729 | -1.299955 | -1.512980 |
| 8  | 2.462046  | 0.037536  | -2.132781 |
| 1  | 2.484673  | 0.916568  | -1.670924 |
| 6  | 3.540503  | -0.050571 | -3.061713 |
| 1  | 3.513480  | -1.046985 | -3.504841 |
| 1  | 4.501949  | 0.090335  | -2.557824 |
| 1  | 3.431674  | 0.696020  | -3.853031 |
| 8  | -0.224422 | 0.994681  | 2.395958  |
| 1  | 0.421126  | 0.251340  | 2.390796  |
| 6  | -1.540188 | 0.456951  | 2.341116  |

|   |           |           |           |
|---|-----------|-----------|-----------|
| 1 | -2.222061 | 1.258215  | 2.047011  |
| 1 | -1.843896 | 0.064300  | 3.317323  |
| 1 | -1.613849 | -0.345702 | 1.598017  |
| 8 | 0.471390  | 3.019918  | 0.746345  |
| 1 | 0.216334  | 2.304713  | 1.373058  |
| 6 | -0.708817 | 3.650042  | 0.256472  |
| 1 | -0.443452 | 4.197788  | -0.650856 |
| 1 | -1.101014 | 4.361160  | 0.992042  |
| 1 | -1.486777 | 2.915431  | 0.019122  |
| 8 | -1.811984 | -2.355715 | -0.587865 |
| 1 | -1.250190 | -1.848711 | -1.211066 |
| 6 | -0.980594 | -2.840635 | 0.461427  |
| 1 | -1.592287 | -2.949769 | 1.360619  |
| 1 | -0.165727 | -2.138649 | 0.674493  |
| 1 | -0.555171 | -3.815372 | 0.202050  |
| 8 | -0.226026 | -0.594661 | -1.862547 |
| 1 | 0.656306  | -0.627837 | -2.270472 |
| 6 | -0.188293 | 0.451500  | -0.897760 |
| 1 | -1.169429 | 0.506707  | -0.418606 |
| 1 | 0.018998  | 1.416291  | -1.373357 |
| 1 | 0.571891  | 0.256619  | -0.128893 |
| 8 | -3.413264 | 1.620196  | -0.380169 |
| 1 | -3.643468 | 0.743574  | -0.009308 |
| 6 | -3.332919 | 1.475004  | -1.786879 |
| 1 | -2.790343 | 2.336829  | -2.185905 |
| 1 | -4.327236 | 1.444264  | -2.249951 |
| 1 | -2.786162 | 0.565623  | -2.071077 |
| 8 | 2.536935  | -1.744192 | -0.079329 |
| 1 | 2.571831  | -1.077961 | -0.800273 |
| 6 | 2.316585  | -3.025976 | -0.656633 |
| 1 | 2.156031  | -3.733732 | 0.158941  |
| 1 | 3.186838  | -3.345574 | -1.238505 |
| 1 | 1.430414  | -3.023146 | -1.301753 |
| 8 | 2.646087  | 2.163197  | -0.573775 |
| 1 | 1.806939  | 2.574940  | -0.262529 |
| 6 | 3.244114  | 1.565854  | 0.572987  |
| 1 | 4.086380  | 0.956528  | 0.236261  |
| 1 | 2.528304  | 0.919155  | 1.097868  |
| 1 | 3.611111  | 2.328810  | 1.266279  |
| 8 | 1.473666  | -1.095179 | 2.293103  |
| 1 | 1.820155  | -1.341188 | 1.403868  |
| 6 | 2.551879  | -1.114948 | 3.221215  |
| 1 | 2.161672  | -0.799532 | 4.190209  |
| 1 | 3.350656  | -0.427117 | 2.920710  |
| 1 | 2.965670  | -2.123669 | 3.316245  |

-----

Cartesian coordinates of : MeOH\_N10\_170.log

-----

Atomic number (AN) and Cartesian coordinates

| AN | X         | Y         | Z         |
|----|-----------|-----------|-----------|
| 8  | 4.436197  | 0.228636  | -0.621123 |
| 1  | 3.933340  | 0.192377  | 0.227583  |
| 6  | 4.553289  | -1.091073 | -1.140506 |
| 1  | 5.378057  | -1.100797 | -1.854993 |
| 1  | 3.635367  | -1.398085 | -1.657342 |
| 1  | 4.767420  | -1.810287 | -0.343184 |
| 8  | -3.187011 | 1.746255  | -0.047577 |
| 1  | -3.226526 | 0.758322  | -0.053302 |
| 6  | -4.436411 | 2.237756  | 0.424281  |
| 1  | -4.377353 | 3.327572  | 0.449068  |
| 1  | -4.653253 | 1.870861  | 1.433036  |
| 1  | -5.249021 | 1.943556  | -0.247651 |
| 8  | 0.344982  | -2.571112 | -0.832317 |

|   |           |           |           |
|---|-----------|-----------|-----------|
| 1 | 0.385379  | -1.714453 | -1.318952 |
| 6 | 1.478351  | -2.651324 | 0.025190  |
| 1 | 1.187994  | -3.186749 | 0.934153  |
| 1 | 1.834845  | -1.650314 | 0.300617  |
| 1 | 2.292567  | -3.199203 | -0.459819 |
| 8 | -3.543538 | -0.880369 | -0.107179 |
| 1 | -2.911437 | -1.545575 | 0.263198  |
| 6 | -3.980312 | -1.352857 | -1.375383 |
| 1 | -4.426985 | -0.513978 | -1.914373 |
| 1 | -4.731720 | -2.141486 | -1.261993 |
| 1 | -3.141205 | -1.742104 | -1.964213 |
| 8 | 2.536906  | 1.536650  | -1.976983 |
| 1 | 3.310312  | 1.070776  | -1.577116 |
| 6 | 2.143394  | 2.558095  | -1.066919 |
| 1 | 1.416233  | 3.194753  | -1.574697 |
| 1 | 2.999677  | 3.170416  | -0.767163 |
| 1 | 1.676365  | 2.133067  | -0.167160 |
| 8 | 0.437286  | -0.146495 | -1.950016 |
| 1 | 1.255209  | 0.400253  | -2.016384 |
| 6 | -0.680458 | 0.715054  | -1.777342 |
| 1 | -1.568967 | 0.090592  | -1.652521 |
| 1 | -0.821603 | 1.359708  | -2.651819 |
| 1 | -0.570840 | 1.340656  | -0.882555 |
| 8 | -1.867317 | -2.803920 | 0.608658  |
| 1 | -1.048155 | -2.718430 | 0.058095  |
| 6 | -2.458514 | -4.074390 | 0.362307  |
| 1 | -3.414524 | -4.104974 | 0.888700  |
| 1 | -1.821722 | -4.880789 | 0.739867  |
| 1 | -2.638593 | -4.230291 | -0.707232 |
| 8 | -1.090421 | 2.815212  | 1.159938  |
| 1 | -1.893311 | 2.393223  | 0.761669  |
| 6 | -0.783902 | 3.983697  | 0.413553  |
| 1 | 0.214187  | 4.320249  | 0.702260  |
| 1 | -1.501060 | 4.783491  | 0.626973  |
| 1 | -0.791614 | 3.780165  | -0.663898 |
| 8 | 0.445879  | 0.763005  | 1.921031  |
| 1 | 0.021717  | 1.606629  | 1.640787  |
| 6 | -0.461012 | -0.294870 | 1.635534  |
| 1 | -0.099214 | -1.197737 | 2.132557  |
| 1 | -0.521710 | -0.487626 | 0.557907  |
| 1 | -1.463364 | -0.066157 | 2.015982  |
| 8 | 3.025783  | 0.164674  | 1.635442  |
| 1 | 2.079243  | 0.440874  | 1.680340  |
| 6 | 3.296618  | -0.751537 | 2.686474  |
| 1 | 4.361601  | -0.988834 | 2.655280  |
| 1 | 2.725798  | -1.680068 | 2.565825  |
| 1 | 3.060658  | -0.311197 | 3.660345  |

-----

Cartesian coordinates of : MeOH\_N10\_187.log

-----

Atomic number (AN) and Cartesian coordinates

| AN | X         | Y         | Z         |
|----|-----------|-----------|-----------|
| 8  | 0.248108  | -1.434623 | 1.079837  |
| 1  | -0.138209 | -1.798261 | 0.259212  |
| 6  | -0.273343 | -0.118391 | 1.237945  |
| 1  | 0.036153  | 0.244528  | 2.221851  |
| 1  | -1.369956 | -0.116293 | 1.196894  |
| 1  | 0.125402  | 0.555281  | 0.470209  |
| 8  | -1.798762 | 2.402214  | -0.298324 |
| 1  | -1.130342 | 2.151114  | -0.983327 |
| 6  | -1.102761 | 3.025402  | 0.778916  |
| 1  | -1.471243 | 2.618134  | 1.726689  |
| 1  | -1.277817 | 4.105942  | 0.768159  |

|   |           |           |           |
|---|-----------|-----------|-----------|
| 1 | -0.026381 | 2.831964  | 0.704328  |
| 8 | -3.339186 | -1.974859 | 0.278331  |
| 1 | -3.452051 | -0.992094 | 0.313325  |
| 6 | -3.192341 | -2.458292 | 1.610083  |
| 1 | -3.221558 | -3.548490 | 1.573772  |
| 1 | -4.010737 | -2.103141 | 2.243608  |
| 1 | -2.235800 | -2.144192 | 2.044747  |
| 8 | -1.163798 | -2.189077 | -1.192772 |
| 1 | -2.006210 | -2.278958 | -0.675690 |
| 6 | -1.297754 | -1.026464 | -2.008721 |
| 1 | -0.349644 | -0.864570 | -2.526601 |
| 1 | -1.519658 | -0.141284 | -1.399693 |
| 1 | -2.090142 | -1.160299 | -2.751307 |
| 8 | 2.862670  | -0.623274 | 1.394012  |
| 1 | 2.033669  | -1.017610 | 1.058476  |
| 6 | 2.942332  | -0.909653 | 2.781937  |
| 1 | 3.853218  | -0.445616 | 3.164815  |
| 1 | 2.993837  | -1.989119 | 2.963813  |
| 1 | 2.083957  | -0.499954 | 3.328989  |
| 8 | 1.901429  | -0.080503 | -1.237782 |
| 1 | 1.721532  | -1.036950 | -1.377576 |
| 6 | 3.225371  | 0.200138  | -1.683075 |
| 1 | 3.385733  | 1.274705  | -1.571812 |
| 1 | 3.357953  | -0.077149 | -2.734065 |
| 1 | 3.957628  | -0.329666 | -1.065167 |
| 8 | 0.178272  | 1.874077  | -1.971256 |
| 1 | 0.773550  | 1.141011  | -1.691536 |
| 6 | 0.949943  | 3.064665  | -2.117991 |
| 1 | 0.251897  | 3.895463  | -2.245376 |
| 1 | 1.587963  | 3.004492  | -3.006333 |
| 1 | 1.565565  | 3.235731  | -1.229662 |
| 8 | -3.627652 | 0.659583  | 0.496313  |
| 1 | -2.919721 | 1.273551  | 0.175002  |
| 6 | -4.892520 | 1.168809  | 0.091836  |
| 1 | -5.658964 | 0.477810  | 0.447905  |
| 1 | -4.961690 | 1.243325  | -0.998583 |
| 1 | -5.074194 | 2.154422  | 0.532002  |
| 8 | 2.314448  | 2.084092  | 0.721262  |
| 1 | 2.451134  | 1.118425  | 0.722815  |
| 6 | 2.328545  | 2.510527  | 2.070429  |
| 1 | 2.234168  | 3.599156  | 2.077851  |
| 1 | 3.263718  | 2.237656  | 2.574563  |
| 1 | 1.488870  | 2.088441  | 2.640079  |
| 8 | 1.501332  | -2.741288 | -1.616421 |
| 1 | 0.546722  | -2.917040 | -1.546157 |
| 6 | 2.207394  | -3.528296 | -0.658896 |
| 1 | 3.253516  | -3.220818 | -0.698194 |
| 1 | 2.138238  | -4.592198 | -0.902310 |
| 1 | 1.825808  | -3.358862 | 0.353912  |

-----

Cartesian coordinates of : MeOH\_N10\_188.log

-----

Atomic number (AN) and Cartesian coordinates

| AN | X         | Y         | Z         |
|----|-----------|-----------|-----------|
| 8  | 0.215436  | -0.808725 | -2.102230 |
| 1  | 1.104401  | -1.170456 | -1.956916 |
| 6  | 0.040223  | 0.246590  | -1.173633 |
| 1  | -0.728195 | 0.920511  | -1.561984 |
| 1  | 0.963248  | 0.821243  | -1.029896 |
| 1  | -0.291773 | -0.122530 | -0.191176 |
| 8  | -0.250777 | 2.644674  | 0.769252  |
| 1  | -1.134635 | 2.339459  | 0.449821  |
| 6  | -0.278398 | 2.816582  | 2.180563  |

|   |           |           |           |
|---|-----------|-----------|-----------|
| 1 | 0.623396  | 3.364106  | 2.465893  |
| 1 | -0.281397 | 1.847430  | 2.692361  |
| 1 | -1.152814 | 3.400270  | 2.487277  |
| 8 | 0.868875  | -2.208350 | 0.751157  |
| 1 | 1.580542  | -1.882100 | 0.146474  |
| 6 | 1.315435  | -3.388518 | 1.419221  |
| 1 | 0.511697  | -3.711687 | 2.083177  |
| 1 | 2.209845  | -3.181959 | 2.014828  |
| 1 | 1.529215  | -4.185969 | 0.701179  |
| 8 | -3.124980 | -0.553087 | -0.840574 |
| 1 | -2.451450 | -1.259744 | -0.686105 |
| 6 | -4.325958 | -0.959916 | -0.194472 |
| 1 | -5.098704 | -0.226943 | -0.434330 |
| 1 | -4.199723 | -0.997752 | 0.894133  |
| 1 | -4.647312 | -1.943308 | -0.551663 |
| 8 | 2.012301  | 3.153473  | -0.545299 |
| 1 | 1.149150  | 3.007108  | -0.090485 |
| 6 | 1.765778  | 3.526904  | -1.894315 |
| 1 | 2.729420  | 3.720148  | -2.368098 |
| 1 | 1.159656  | 4.437233  | -1.943272 |
| 1 | 1.255236  | 2.727919  | -2.445000 |
| 8 | -2.672587 | 1.941396  | -0.073932 |
| 1 | -2.775175 | 0.993307  | -0.343009 |
| 6 | -3.065599 | 2.763986  | -1.165827 |
| 1 | -2.978507 | 3.804494  | -0.847863 |
| 1 | -4.104151 | 2.566251  | -1.449641 |
| 1 | -2.420607 | 2.606354  | -2.038676 |
| 8 | -1.596182 | -2.680267 | -0.332616 |
| 1 | -0.685901 | -2.469590 | -0.034199 |
| 6 | -1.517476 | -3.517077 | -1.482900 |
| 1 | -2.539387 | -3.738998 | -1.796866 |
| 1 | -1.011559 | -4.458375 | -1.243797 |
| 1 | -0.989272 | -3.008260 | -2.294415 |
| 8 | 3.315637  | 0.950241  | 0.248803  |
| 1 | 2.974479  | 1.775032  | -0.170999 |
| 6 | 2.609187  | 0.791633  | 1.479239  |
| 1 | 2.857101  | -0.194151 | 1.881474  |
| 1 | 1.525043  | 0.853354  | 1.324184  |
| 1 | 2.912956  | 1.555673  | 2.202185  |
| 8 | -0.256585 | -0.593328 | 2.735564  |
| 1 | 0.252213  | -1.040425 | 2.035676  |
| 6 | -1.611616 | -0.544454 | 2.321141  |
| 1 | -2.224797 | -0.326159 | 3.198740  |
| 1 | -1.938842 | -1.500403 | 1.892662  |
| 1 | -1.780973 | 0.247701  | 1.577607  |
| 8 | 2.727343  | -1.295511 | -0.937760 |
| 1 | 3.020940  | -0.409061 | -0.586001 |
| 6 | 3.858376  | -2.143339 | -1.126223 |
| 1 | 3.493714  | -3.111093 | -1.473890 |
| 1 | 4.402627  | -2.281748 | -0.186539 |
| 1 | 4.532717  | -1.725353 | -1.878535 |

-----  
 Cartesian coordinates of : MeOH\_N10\_244.log

-----  
 Atomic number (AN) and Cartesian coordinates

| AN | X        | Y         | Z         |
|----|----------|-----------|-----------|
| 8  | 0.600171 | 3.833413  | -0.313739 |
| 1  | 0.289428 | 3.049691  | -0.811671 |
| 6  | 1.796894 | 4.282167  | -0.924217 |
| 1  | 2.141330 | 5.163128  | -0.378321 |
| 1  | 1.639413 | 4.561625  | -1.972703 |
| 1  | 2.586947 | 3.519894  | -0.881555 |
| 8  | 2.093022 | -2.680624 | -1.032596 |

|   |           |           |           |
|---|-----------|-----------|-----------|
| 1 | 2.585326  | -1.944866 | -0.585366 |
| 6 | 2.542426  | -2.800972 | -2.375599 |
| 1 | 2.024417  | -3.649542 | -2.826332 |
| 1 | 3.620447  | -2.987514 | -2.411108 |
| 1 | 2.316811  | -1.899893 | -2.958081 |
| 8 | -0.414851 | 0.451635  | 2.284757  |
| 1 | -0.828668 | -0.424589 | 2.135197  |
| 6 | -1.140900 | 1.411463  | 1.523231  |
| 1 | -0.460459 | 2.216985  | 1.232465  |
| 1 | -1.961332 | 1.833847  | 2.113698  |
| 1 | -1.550748 | 0.957890  | 0.611411  |
| 8 | 3.491050  | -0.756934 | 0.128613  |
| 1 | 2.984041  | -0.256304 | 0.817482  |
| 6 | 4.657385  | -1.296705 | 0.740090  |
| 1 | 5.212089  | -1.844530 | -0.024008 |
| 1 | 4.399663  | -1.984280 | 1.552790  |
| 1 | 5.294394  | -0.498197 | 1.133639  |
| 8 | -2.528469 | 0.954228  | -1.839550 |
| 1 | -2.943636 | 0.298901  | -1.232161 |
| 6 | -3.092364 | 2.231629  | -1.561910 |
| 1 | -2.600877 | 2.960021  | -2.209684 |
| 1 | -2.926972 | 2.524373  | -0.517314 |
| 1 | -4.166698 | 2.240886  | -1.770928 |
| 8 | 0.095577  | 1.529017  | -1.683289 |
| 1 | -0.824621 | 1.187944  | -1.754646 |
| 6 | 0.943199  | 0.569564  | -1.070227 |
| 1 | 1.827876  | 1.092812  | -0.696754 |
| 1 | 1.270670  | -0.191012 | -1.788735 |
| 1 | 0.455230  | 0.069516  | -0.221861 |
| 8 | 2.264242  | 0.597927  | 2.041493  |
| 1 | 1.292094  | 0.476499  | 2.142513  |
| 6 | 2.547383  | 1.993855  | 2.014508  |
| 1 | 3.597907  | 2.113084  | 1.739217  |
| 1 | 2.389278  | 2.440799  | 3.001605  |
| 1 | 1.923265  | 2.516556  | 1.279740  |
| 8 | -0.509254 | -2.771711 | -0.645661 |
| 1 | 0.474629  | -2.714931 | -0.772299 |
| 6 | -1.173672 | -2.258428 | -1.794351 |
| 1 | -2.248727 | -2.373622 | -1.637408 |
| 1 | -0.885492 | -2.813666 | -2.692184 |
| 1 | -0.955091 | -1.194613 | -1.945321 |
| 8 | -1.680473 | -1.785886 | 1.427143  |
| 1 | -1.142575 | -2.178979 | 0.675843  |
| 6 | -2.149720 | -2.838086 | 2.270540  |
| 1 | -2.760958 | -2.388659 | 3.054503  |
| 1 | -1.311638 | -3.369706 | 2.729467  |
| 1 | -2.760509 | -3.544759 | 1.700328  |
| 8 | -3.689330 | -0.664474 | -0.021296 |
| 1 | -2.995067 | -1.073158 | 0.542182  |
| 6 | -4.621980 | 0.016038  | 0.812020  |
| 1 | -5.380000 | 0.460525  | 0.165080  |
| 1 | -4.136780 | 0.811954  | 1.388304  |
| 1 | -5.109779 | -0.679989 | 1.501465  |

-----  
Cartesian coordinates of : MeOH\_N10\_280.log

-----  
Atomic number (AN) and Cartesian coordinates

| AN | X        | Y        | Z         |
|----|----------|----------|-----------|
| 8  | 2.709608 | 2.023017 | 0.389768  |
| 1  | 2.123869 | 1.691705 | 1.103971  |
| 6  | 2.047605 | 3.091326 | -0.274853 |
| 1  | 2.639953 | 3.355471 | -1.152822 |
| 1  | 1.967148 | 3.967338 | 0.376808  |

|   |           |           |           |
|---|-----------|-----------|-----------|
| 1 | 1.043551  | 2.799184  | -0.605596 |
| 8 | -1.410247 | 2.199995  | 1.094552  |
| 1 | -0.529803 | 1.937613  | 1.436712  |
| 6 | -2.226222 | 1.030011  | 1.123499  |
| 1 | -3.272312 | 1.343200  | 1.114730  |
| 1 | -2.042272 | 0.442352  | 2.027364  |
| 1 | -2.040216 | 0.392491  | 0.247787  |
| 8 | -1.509172 | 2.691837  | -1.547042 |
| 1 | -1.402797 | 2.654241  | -0.568189 |
| 6 | -2.903538 | 2.755880  | -1.835061 |
| 1 | -3.013697 | 2.939564  | -2.904670 |
| 1 | -3.380368 | 3.571696  | -1.283637 |
| 1 | -3.404650 | 1.812462  | -1.583923 |
| 8 | 3.859471  | -0.102282 | -0.817611 |
| 1 | 3.460003  | 0.707089  | -0.423556 |
| 6 | 4.209447  | 0.137129  | -2.174187 |
| 1 | 4.670231  | -0.772939 | -2.561604 |
| 1 | 4.928319  | 0.958503  | -2.252636 |
| 1 | 3.328436  | 0.371493  | -2.782577 |
| 8 | 0.851031  | 1.094194  | 2.148116  |
| 1 | 0.821063  | 0.099859  | 2.014282  |
| 6 | 0.924911  | 1.372915  | 3.546787  |
| 1 | 1.012728  | 2.453601  | 3.667248  |
| 1 | 1.799468  | 0.889956  | 3.991334  |
| 1 | 0.019639  | 1.028028  | 4.056139  |
| 8 | -0.640173 | 0.206939  | -2.111614 |
| 1 | -0.960780 | 1.135935  | -2.032968 |
| 6 | 0.505248  | 0.075829  | -1.280362 |
| 1 | 0.797984  | -0.977321 | -1.264043 |
| 1 | 0.295379  | 0.396949  | -0.249375 |
| 1 | 1.342408  | 0.667578  | -1.665802 |
| 8 | -3.703347 | -1.640678 | 0.953950  |
| 1 | -3.149726 | -1.738877 | 0.154973  |
| 6 | -4.959421 | -1.143584 | 0.530429  |
| 1 | -5.553651 | -0.929585 | 1.421577  |
| 1 | -5.502036 | -1.873822 | -0.082698 |
| 1 | -4.854904 | -0.215520 | -0.047064 |
| 8 | 0.817843  | -1.478195 | 1.807963  |
| 1 | 1.473521  | -1.756423 | 1.115912  |
| 6 | -0.440193 | -2.072661 | 1.505337  |
| 1 | -1.129867 | -1.841934 | 2.319120  |
| 1 | -0.342334 | -3.159839 | 1.419755  |
| 1 | -0.856370 | -1.674399 | 0.571768  |
| 8 | 2.498767  | -2.263523 | -0.079007 |
| 1 | 2.999200  | -1.475816 | -0.409154 |
| 6 | 3.429446  | -3.238796 | 0.378700  |
| 1 | 2.859612  | -4.074432 | 0.788850  |
| 1 | 4.078248  | -2.832596 | 1.161859  |
| 1 | 4.047193  | -3.603814 | -0.447564 |
| 8 | -2.360485 | -1.758827 | -1.454218 |
| 1 | -1.810521 | -0.989507 | -1.726817 |
| 6 | -1.708490 | -2.950410 | -1.870519 |
| 1 | -2.313353 | -3.795110 | -1.535220 |
| 1 | -0.708898 | -3.038854 | -1.426754 |
| 1 | -1.618530 | -2.991164 | -2.960998 |

-----  
Cartesian coordinates of : MeOH\_N10\_33.log

-----  
Atomic number (AN) and Cartesian coordinates

| AN | X         | Y         | Z         |
|----|-----------|-----------|-----------|
| 8  | -2.993462 | -1.522453 | -0.719499 |
| 1  | -2.030571 | -1.682410 | -0.633993 |
| 6  | -3.387333 | -1.919360 | -2.025693 |

|   |           |           |           |
|---|-----------|-----------|-----------|
| 1 | -4.468507 | -1.788404 | -2.099719 |
| 1 | -3.142024 | -2.970928 | -2.205602 |
| 1 | -2.901644 | -1.304404 | -2.792309 |
| 8 | 3.422000  | 2.036518  | -0.681433 |
| 1 | 2.547418  | 2.168800  | -0.263448 |
| 6 | 3.278374  | 2.061618  | -2.099951 |
| 1 | 4.271701  | 1.919949  | -2.529009 |
| 1 | 2.882641  | 3.024947  | -2.436625 |
| 1 | 2.619490  | 1.254751  | -2.439669 |
| 8 | -1.061142 | -0.387501 | 1.003263  |
| 1 | -0.160353 | -0.752858 | 1.112875  |
| 6 | -1.790210 | -0.555869 | 2.203720  |
| 1 | -2.783665 | -0.127977 | 2.045689  |
| 1 | -1.319104 | -0.032247 | 3.045823  |
| 1 | -1.908062 | -1.615144 | 2.467228  |
| 8 | -1.315206 | 2.527911  | 0.885486  |
| 1 | -1.934865 | 1.831358  | 0.568559  |
| 6 | -1.571023 | 3.708151  | 0.134666  |
| 1 | -0.875567 | 4.477019  | 0.476046  |
| 1 | -2.594882 | 4.059464  | 0.297555  |
| 1 | -1.417777 | 3.537732  | -0.936766 |
| 8 | -0.432189 | -2.564409 | -1.031568 |
| 1 | 0.224875  | -1.870677 | -0.825060 |
| 6 | -0.440123 | -3.549169 | -0.010747 |
| 1 | -1.139087 | -4.330145 | -0.319279 |
| 1 | -0.777711 | -3.129515 | 0.945424  |
| 1 | 0.551728  | -3.989574 | 0.133129  |
| 8 | 0.925662  | -0.153821 | -1.252742 |
| 1 | 1.087974  | 0.358349  | -0.435210 |
| 6 | -0.153330 | 0.482935  | -1.925778 |
| 1 | -0.383195 | -0.108555 | -2.815023 |
| 1 | 0.121068  | 1.498220  | -2.241350 |
| 1 | -1.041114 | 0.531679  | -1.284410 |
| 8 | -3.289253 | 1.103053  | -0.290612 |
| 1 | -3.135806 | 0.134744  | -0.414748 |
| 6 | -4.623780 | 1.301497  | 0.146369  |
| 1 | -4.789715 | 2.376432  | 0.243504  |
| 1 | -4.805071 | 0.830448  | 1.120129  |
| 1 | -5.340888 | 0.900810  | -0.578754 |
| 8 | 3.682967  | -0.544407 | 0.153620  |
| 1 | 3.652482  | 0.397535  | -0.128923 |
| 6 | 3.936107  | -1.350501 | -0.995246 |
| 1 | 3.996471  | -2.388261 | -0.660439 |
| 1 | 4.887486  | -1.075513 | -1.461770 |
| 1 | 3.123005  | -1.252985 | -1.721916 |
| 8 | 1.156415  | 1.703913  | 0.778050  |
| 1 | 0.200764  | 1.998932  | 0.795864  |
| 6 | 1.575056  | 1.444213  | 2.112034  |
| 1 | 2.584996  | 1.026400  | 2.075094  |
| 1 | 0.914417  | 0.714159  | 2.591837  |
| 1 | 1.590560  | 2.365503  | 2.703216  |
| 8 | 1.428481  | -1.576068 | 1.174228  |
| 1 | 2.227215  | -1.126566 | 0.808257  |
| 6 | 1.787270  | -2.227253 | 2.382543  |
| 1 | 0.908147  | -2.764193 | 2.747157  |
| 1 | 2.102164  | -1.507358 | 3.147695  |
| 1 | 2.594765  | -2.948976 | 2.217098  |

-----  
Cartesian coordinates of : MeOH\_N10\_56.log

-----  
Atomic number (AN) and Cartesian coordinates

| AN | X         | Y         | Z        |
|----|-----------|-----------|----------|
| 8  | -3.023117 | -0.997801 | 0.451622 |

-----



|   |           |           |           |
|---|-----------|-----------|-----------|
| 1 | -2.461655 | -0.487428 | 1.085482  |
| 6 | -4.147397 | -1.515466 | 1.153671  |
| 1 | -4.760403 | -2.066852 | 0.438555  |
| 1 | -4.745679 | -0.704253 | 1.580714  |
| 1 | -3.837389 | -2.195352 | 1.954373  |
| 8 | 3.031738  | 0.241947  | -2.048514 |
| 1 | 2.952359  | -0.619643 | -1.581818 |
| 6 | 3.741330  | 1.113861  | -1.172587 |
| 1 | 3.748354  | 2.107779  | -1.623861 |
| 1 | 4.773942  | 0.777533  | -1.036068 |
| 1 | 3.250384  | 1.176206  | -0.193430 |
| 8 | -1.762434 | -2.722258 | -1.109999 |
| 1 | -2.244810 | -2.103099 | -0.507273 |
| 6 | -2.006250 | -2.330153 | -2.452727 |
| 1 | -1.355136 | -2.920171 | -3.100310 |
| 1 | -1.786073 | -1.266676 | -2.606678 |
| 1 | -3.048176 | -2.518788 | -2.732508 |
| 8 | 2.775047  | -1.852041 | -0.382683 |
| 1 | 1.935653  | -2.342214 | -0.212996 |
| 6 | 3.834597  | -2.451048 | 0.347183  |
| 1 | 4.742638  | -1.878948 | 0.146613  |
| 1 | 3.995672  | -3.489099 | 0.038288  |
| 1 | 3.635669  | -2.425133 | 1.425230  |
| 8 | -1.702353 | 0.573975  | 2.125866  |
| 1 | -0.732843 | 0.539713  | 2.284613  |
| 6 | -2.002037 | 1.882820  | 1.645274  |
| 1 | -3.087495 | 1.959537  | 1.549199  |
| 1 | -1.547750 | 2.065612  | 0.663329  |
| 1 | -1.652377 | 2.644374  | 2.350493  |
| 8 | 0.931337  | 1.029747  | 2.418616  |
| 1 | 1.044583  | 1.713920  | 1.719651  |
| 6 | 2.094053  | 0.214328  | 2.487315  |
| 1 | 1.952678  | -0.495068 | 3.305027  |
| 1 | 2.983660  | 0.818475  | 2.695049  |
| 1 | 2.252718  | -0.347437 | 1.556635  |
| 8 | 0.512721  | -3.134479 | 0.250590  |
| 1 | -0.228562 | -3.055252 | -0.392813 |
| 6 | 0.041797  | -2.626301 | 1.493049  |
| 1 | 0.822963  | -2.787097 | 2.238795  |
| 1 | -0.866782 | -3.148312 | 1.811491  |
| 1 | -0.171407 | -1.550615 | 1.432582  |
| 8 | 1.125734  | 2.810355  | 0.400650  |
| 1 | 0.911375  | 2.375257  | -0.448180 |
| 6 | 0.535104  | 4.105873  | 0.452891  |
| 1 | 0.585284  | 4.446831  | 1.488475  |
| 1 | -0.510553 | 4.074666  | 0.131095  |
| 1 | 1.087824  | 4.808058  | -0.179262 |
| 8 | 0.530285  | 1.104648  | -1.693303 |
| 1 | 1.424158  | 0.877231  | -2.046101 |
| 6 | 0.141742  | 0.015857  | -0.857389 |
| 1 | -0.900654 | 0.168860  | -0.559219 |
| 1 | 0.765896  | -0.028054 | 0.043499  |
| 1 | 0.219080  | -0.935660 | -1.392193 |
| 8 | -1.756745 | 2.705645  | -1.744631 |
| 1 | -0.953653 | 2.200990  | -1.954277 |
| 6 | -2.882710 | 1.856863  | -1.908510 |
| 1 | -3.776334 | 2.465668  | -1.756199 |
| 1 | -2.893327 | 1.039567  | -1.174324 |
| 1 | -2.922918 | 1.427168  | -2.916398 |

-----  
Cartesian coordinates of : MeOH\_N10\_8r\_2\_2.log

-----  
Atomic number (AN) and Cartesian coordinates  
AN X Y Z

```
-----  
6 -2.071036 3.425947 1.007964  
8 -2.440229 2.850616 -0.239882  
8 -0.243969 1.654573 -1.111636  
6 -0.493124 0.296377 -0.762514  
8 1.823780 2.233046 0.378885  
6 1.936324 3.606016 0.745660  
8 2.134448 0.252947 2.159241  
6 3.507347 -0.031303 1.888399  
8 1.011703 -1.950583 1.291307  
6 1.497274 -3.012069 2.112325  
8 -4.096046 0.895081 0.401235  
6 -5.453526 1.116901 0.038052  
8 -3.525114 -1.492301 -0.625744  
6 -4.533921 -2.439213 -0.290824  
8 -1.248430 -2.714207 0.027168  
6 -0.624791 -3.312066 -1.105274  
8 2.454001 -1.792058 -1.109075  
6 3.444988 -2.804403 -1.054431  
1 -1.438961 2.743000 1.590198  
1 -2.956407 3.680417 1.598645  
1 -1.510334 4.339945 0.803353  
1 -3.075248 2.110899 -0.057248  
1 -1.279229 -0.133330 -1.393422  
1 -0.789087 0.204072 0.291350  
1 0.432899 -0.264339 -0.923207  
1 -1.061269 2.171396 -0.891893  
1 1.063534 3.932580 1.318642  
1 2.045050 4.235798 -0.143061  
1 2.827870 3.710709 1.366165  
1 1.030807 2.101124 -0.213450  
1 -0.156771 -2.559706 -1.749194  
1 -1.398910 -3.835594 -1.669147  
1 -0.548844 -2.313745 0.584183  
1 4.113864 0.875481 1.974300  
1 3.628743 -0.453035 0.882978  
1 3.850296 -0.756025 2.629102  
1 1.886584 1.015860 1.588121  
1 1.192052 -2.870699 3.152817  
1 2.589192 -3.078742 2.059332  
1 1.067784 -3.944060 1.739375  
1 1.317237 -1.080218 1.668013  
1 -6.118756 0.437554 0.581231  
1 -5.604040 0.984051 -1.038781  
1 -5.707536 2.144463 0.305261  
1 -3.821417 0.010765 0.052747  
1 -4.632211 -2.549879 0.794720  
1 -4.312683 -3.415967 -0.732318  
1 -5.479905 -2.076739 -0.697586  
1 -2.652666 -1.866467 -0.356363  
1 4.032348 -2.744230 -1.972566  
1 4.121805 -2.665297 -0.201292  
1 2.999634 -3.805149 -0.990781  
1 1.906724 -1.866889 -0.306081  
1 0.136334 -4.035748 -0.793654  
6 3.100618 1.716756 -2.547210  
1 3.743802 1.617311 -3.423922  
1 2.530011 2.649847 -2.636396  
1 2.397179 0.875445 -2.530056  
8 3.933528 1.722309 -1.398834  
1 3.340234 1.822100 -0.634323  
-----
```

Cartesian coordinates of : MeOH\_N10\_8r\_2\_3.log

```
-----
```

## Atomic number (AN) and Cartesian coordinates

| AN | X         | Y         | Z         |
|----|-----------|-----------|-----------|
| 6  | 0.868603  | 2.847521  | 0.712335  |
| 8  | 1.616736  | 2.620155  | -0.480135 |
| 8  | 3.507049  | 0.895006  | -0.040975 |
| 6  | 4.792395  | 1.455531  | -0.297041 |
| 8  | 3.040809  | -1.633394 | -0.819350 |
| 6  | 3.860310  | -2.351911 | 0.099646  |
| 8  | 0.558952  | -2.484026 | -0.656012 |
| 6  | 0.182091  | -3.095786 | -1.882425 |
| 8  | -1.381554 | -1.551790 | 0.756392  |
| 6  | -1.664628 | -2.557182 | 1.726603  |
| 8  | -0.259387 | 1.755019  | -2.154542 |
| 6  | -0.226165 | 0.384505  | -1.773924 |
| 8  | -2.507583 | 2.423002  | -0.863613 |
| 6  | -2.705117 | 3.768703  | -0.445625 |
| 8  | -2.162333 | 0.975094  | 1.391687  |
| 6  | -3.436365 | 0.684971  | 1.965052  |
| 8  | -3.530371 | -1.189002 | -1.019665 |
| 6  | -4.316100 | -2.311171 | -0.654665 |
| 1  | -0.074774 | 2.287406  | 0.700809  |
| 1  | 0.651356  | 3.913373  | 0.831310  |
| 1  | 1.464722  | 2.506107  | 1.563518  |
| 1  | 0.983477  | 2.419233  | -1.211254 |
| 1  | 4.944264  | 2.361308  | 0.297245  |
| 1  | 4.909927  | 1.693035  | -1.358371 |
| 1  | 5.541129  | 0.714294  | -0.012693 |
| 1  | 2.796478  | 1.558351  | -0.272272 |
| 1  | 3.725530  | -1.981210 | 1.122271  |
| 1  | 4.915781  | -2.272025 | -0.178067 |
| 1  | 3.562147  | -3.401274 | 0.059919  |
| 1  | 3.185480  | -0.672187 | -0.664383 |
| 1  | -4.009322 | 0.008066  | 1.321013  |
| 1  | -3.978107 | 1.627815  | 2.058591  |
| 1  | -1.717138 | 0.119373  | 1.217732  |
| 1  | 0.711862  | -4.042883 | -2.024157 |
| 1  | 0.385566  | -2.438300 | -2.734219 |
| 1  | -0.891977 | -3.292706 | -1.839012 |
| 1  | 1.484088  | -2.128597 | -0.714507 |
| 1  | -0.847566 | -2.640370 | 2.450810  |
| 1  | -1.822105 | -3.527239 | 1.244438  |
| 1  | -2.577427 | -2.270429 | 2.253083  |
| 1  | -0.591137 | -1.843619 | 0.217628  |
| 1  | -0.961541 | -0.204636 | -2.332951 |
| 1  | -0.425584 | 0.269752  | -0.700259 |
| 1  | 0.774832  | -0.002265 | -1.982273 |
| 1  | -1.111741 | 2.120218  | -1.818011 |
| 1  | -1.886844 | 4.111820  | 0.197081  |
| 1  | -3.652292 | 3.875620  | 0.092765  |
| 1  | -2.736618 | 4.393103  | -1.339756 |
| 1  | -2.412461 | 1.858065  | -0.062276 |
| 1  | -5.208868 | -2.310985 | -1.282878 |
| 1  | -3.777766 | -3.253526 | -0.815122 |
| 1  | -4.632352 | -2.262551 | 0.395745  |
| 1  | -2.722132 | -1.220319 | -0.477617 |
| 1  | -3.324013 | 0.242679  | 2.959855  |
| 6  | 1.330287  | -0.470157 | 1.847855  |
| 1  | 0.493601  | -0.291259 | 2.529824  |
| 1  | 1.419203  | -1.552980 | 1.680187  |
| 1  | 1.097968  | 0.005551  | 0.885023  |
| 8  | 2.508668  | 0.068396  | 2.419762  |
| 1  | 3.074619  | 0.366353  | 1.685956  |

Cartesian coordinates of : MeOH\_N10\_8r\_2\_4.log

-----  
Atomic number (AN) and Cartesian coordinates

| AN | X         | Y         | Z         |
|----|-----------|-----------|-----------|
| 6  | 4.007692  | 2.392748  | 0.345973  |
| 8  | 3.066043  | 1.953062  | -0.625699 |
| 8  | 3.189235  | -0.637743 | -0.651347 |
| 6  | 4.136370  | -0.881414 | -1.689975 |
| 8  | 1.438505  | -2.698469 | -0.651822 |
| 6  | 2.296817  | -3.661875 | -0.049197 |
| 8  | -1.061669 | -2.965265 | 0.194494  |
| 6  | -1.610431 | -3.840701 | -0.784953 |
| 8  | -2.909476 | -1.196746 | 0.668179  |
| 6  | -3.592601 | -1.747239 | 1.793161  |
| 8  | 1.119914  | 3.719583  | -0.386265 |
| 6  | 1.165180  | 4.697593  | -1.416958 |
| 8  | -1.485842 | 3.556864  | 0.122327  |
| 6  | -1.784948 | 4.488404  | 1.154828  |
| 8  | -3.020121 | 1.501630  | 0.874381  |
| 6  | -4.354742 | 1.657305  | 0.404807  |
| 8  | -4.603682 | -1.320338 | -1.568382 |
| 6  | -5.831753 | -1.635326 | -0.935917 |
| 1  | 3.580525  | 2.369305  | 1.353854  |
| 1  | 4.351732  | 3.407582  | 0.122851  |
| 1  | 4.864135  | 1.714808  | 0.311379  |
| 1  | 2.261575  | 2.526177  | -0.563897 |
| 1  | 5.046934  | -0.294304 | -1.532110 |
| 1  | 3.713738  | -0.636402 | -2.668897 |
| 1  | 4.392331  | -1.943034 | -1.668569 |
| 1  | 2.995516  | 0.340516  | -0.636711 |
| 1  | 2.776616  | -3.256925 | 0.848352  |
| 1  | 3.066440  | -3.994077 | -0.754664 |
| 1  | 1.686459  | -4.522822 | 0.231742  |
| 1  | 1.925118  | -1.848246 | -0.700227 |
| 1  | -4.515847 | 1.098467  | -0.523340 |
| 1  | -4.519850 | 2.719673  | 0.212097  |
| 1  | -2.793849 | 0.549081  | 0.828056  |
| 1  | -1.090241 | -4.803648 | -0.781379 |
| 1  | -1.553684 | -3.402514 | -1.786704 |
| 1  | -2.660278 | -4.006918 | -0.532078 |
| 1  | -0.130778 | -2.757166 | -0.062664 |
| 1  | -2.955271 | -1.732924 | 2.682185  |
| 1  | -3.909362 | -2.775789 | 1.591526  |
| 1  | -4.477687 | -1.135188 | 1.980447  |
| 1  | -2.113447 | -1.767194 | 0.482111  |
| 1  | 0.707301  | 5.635715  | -1.086267 |
| 1  | 0.655868  | 4.348854  | -2.321402 |
| 1  | 2.215025  | 4.884075  | -1.652538 |
| 1  | 0.173931  | 3.531608  | -0.176106 |
| 1  | -1.494782 | 4.101825  | 2.137400  |
| 1  | -2.852375 | 4.732120  | 1.165769  |
| 1  | -1.219712 | 5.400845  | 0.953784  |
| 1  | -1.963229 | 2.718893  | 0.321687  |
| 1  | -6.599553 | -1.694945 | -1.709738 |
| 1  | -5.786513 | -2.601033 | -0.417112 |
| 1  | -6.128304 | -0.862571 | -0.214321 |
| 1  | -3.924208 | -1.263030 | -0.872192 |
| 1  | -5.076220 | 1.323303  | 1.159018  |
| 6  | 5.507831  | -1.976627 | 1.366912  |
| 1  | 6.063628  | -2.307276 | 2.246457  |
| 1  | 6.137910  | -1.279897 | 0.799997  |
| 1  | 5.301562  | -2.853781 | 0.739154  |
| 8  | 4.314236  | -1.359247 | 1.815906  |
| 1  | 3.835226  | -1.047017 | 1.026790  |

  
-----

Cartesian coordinates of : MeOH\_N10\_8r\_2.log

-----  
Atomic number (AN) and Cartesian coordinates

| AN | X         | Y         | Z         |
|----|-----------|-----------|-----------|
| 6  | 4.507719  | -0.645201 | -1.257011 |
| 8  | 3.366238  | -0.412107 | -0.433833 |
| 8  | 2.617792  | 2.167549  | -0.770753 |
| 6  | 3.621183  | 2.748514  | 0.055702  |
| 8  | 0.324797  | 3.509430  | -0.531076 |
| 6  | 0.498149  | 4.529786  | -1.506416 |
| 8  | -2.199079 | 2.732303  | -0.423302 |
| 6  | -2.687971 | 3.414820  | 0.725691  |
| 8  | -3.366239 | 0.412102  | -0.433844 |
| 6  | -4.507722 | 0.645206  | -1.257016 |
| 8  | 2.199089  | -2.732311 | -0.423313 |
| 6  | 2.687976  | -3.414825 | 0.725684  |
| 8  | -0.324795 | -3.509433 | -0.531069 |
| 6  | -0.498158 | -4.529801 | -1.506395 |
| 8  | -2.617800 | -2.167555 | -0.770755 |
| 6  | -3.621194 | -2.748509 | 0.055703  |
| 8  | -4.204558 | 0.028862  | 2.218366  |
| 6  | -5.603138 | -0.091604 | 2.026927  |
| 1  | 4.211284  | -0.815069 | -2.296299 |
| 1  | 5.077668  | -1.508504 | -0.898025 |
| 1  | 5.142872  | 0.242082  | -1.209066 |
| 1  | 2.797500  | -1.230830 | -0.457492 |
| 1  | 4.598717  | 2.721051  | -0.438637 |
| 1  | 3.687284  | 2.232497  | 1.019559  |
| 1  | 3.348311  | 3.791701  | 0.229813  |
| 1  | 2.723993  | 1.193678  | -0.733507 |
| 1  | 0.591188  | 4.108479  | -2.512789 |
| 1  | 1.384234  | 5.134332  | -1.286778 |
| 1  | -0.382822 | 5.174039  | -1.473123 |
| 1  | 1.102465  | 2.905566  | -0.574029 |
| 1  | -3.687302 | -2.232478 | 1.019553  |
| 1  | -3.348322 | -3.791693 | 0.229832  |
| 1  | -2.723996 | -1.193683 | -0.733517 |
| 1  | -2.595568 | 4.498518  | 0.603051  |
| 1  | -2.153006 | 3.106290  | 1.629849  |
| 1  | -3.745024 | 3.162185  | 0.838999  |
| 1  | -1.230141 | 2.915039  | -0.505873 |
| 1  | -4.211293 | 0.815048  | -2.296311 |
| 1  | -5.077647 | 1.508530  | -0.898042 |
| 1  | -5.142895 | -0.242061 | -1.209047 |
| 1  | -2.797498 | 1.230821  | -0.457501 |
| 1  | 2.595576  | -4.498523 | 0.603045  |
| 1  | 2.153006  | -3.106294 | 1.629839  |
| 1  | 3.745029  | -3.162187 | 0.838996  |
| 1  | 1.230151  | -2.915043 | -0.505885 |
| 1  | -0.591211 | -4.108505 | -2.512772 |
| 1  | -1.384240 | -5.134344 | -1.286739 |
| 1  | 0.382814  | -5.174052 | -1.473106 |
| 1  | -1.102462 | -2.905570 | -0.574020 |
| 1  | -6.060139 | -0.259187 | 3.004138  |
| 1  | -6.034740 | 0.819418  | 1.593833  |
| 1  | -5.853738 | -0.941529 | 1.378319  |
| 1  | -3.803419 | 0.182278  | 1.343557  |
| 1  | -4.598726 | -2.721053 | -0.438641 |
| 6  | 5.603146  | 0.091624  | 2.026919  |
| 1  | 6.060146  | 0.259222  | 3.004128  |
| 1  | 5.853737  | 0.941545  | 1.378303  |
| 1  | 6.034756  | -0.819398 | 1.593835  |
| 8  | 4.204568  | -0.028853 | 2.218362  |

1 3.803426 -0.182281 1.343555

-----  
Cartesian coordinates of : MeOH\_N10\_91.log

-----  
Atomic number (AN) and Cartesian coordinates

| AN | X         | Y         | Z         |
|----|-----------|-----------|-----------|
| 8  | 1.087311  | 1.183351  | 2.315943  |
| 1  | 0.700842  | 0.309020  | 2.542982  |
| 6  | 0.006209  | 2.100015  | 2.166444  |
| 1  | 0.417267  | 3.053668  | 1.829713  |
| 1  | -0.510290 | 2.250839  | 3.120983  |
| 1  | -0.712641 | 1.747983  | 1.416454  |
| 8  | 0.831659  | -1.159588 | -1.299031 |
| 1  | 1.789129  | -1.078304 | -1.524249 |
| 6  | 0.359466  | 0.173988  | -1.075323 |
| 1  | -0.728244 | 0.177740  | -1.195741 |
| 1  | 0.797409  | 0.863727  | -1.801786 |
| 1  | 0.609487  | 0.514518  | -0.063525 |
| 8  | -0.578045 | 3.036626  | -0.956763 |
| 1  | -1.331036 | 2.533822  | -0.589281 |
| 6  | -0.801009 | 3.210054  | -2.343532 |
| 1  | 0.107671  | 3.635627  | -2.776877 |
| 1  | -1.634492 | 3.895494  | -2.540545 |
| 1  | -1.008296 | 2.256023  | -2.845583 |
| 8  | -2.729050 | 1.619594  | -0.013221 |
| 1  | -2.947065 | 0.666332  | -0.137786 |
| 6  | -3.484055 | 2.151681  | 1.063288  |
| 1  | -3.209008 | 3.203235  | 1.173264  |
| 1  | -3.263883 | 1.635125  | 2.005138  |
| 1  | -4.559412 | 2.087848  | 0.865426  |
| 8  | 1.364243  | -2.531446 | 1.034178  |
| 1  | 1.082911  | -2.097300 | 0.201766  |
| 6  | 2.749874  | -2.250053 | 1.213573  |
| 1  | 3.055310  | -2.687373 | 2.164956  |
| 1  | 2.936881  | -1.169284 | 1.239546  |
| 1  | 3.343555  | -2.695618 | 0.408899  |
| 8  | -0.226142 | -1.173613 | 2.731287  |
| 1  | 0.395931  | -1.789623 | 2.285018  |
| 6  | -1.388407 | -1.123002 | 1.910663  |
| 1  | -2.041144 | -0.334973 | 2.292065  |
| 1  | -1.933774 | -2.072661 | 1.932249  |
| 1  | -1.128835 | -0.885615 | 0.870643  |
| 8  | -3.407509 | -0.949209 | -0.388562 |
| 1  | -2.687399 | -1.510275 | -0.758761 |
| 6  | -4.529324 | -1.028801 | -1.261522 |
| 1  | -5.323039 | -0.410590 | -0.838286 |
| 1  | -4.888675 | -2.059635 | -1.340536 |
| 1  | -4.283280 | -0.655070 | -2.261165 |
| 8  | 3.324674  | -0.305263 | -1.513438 |
| 1  | 3.278057  | 0.335643  | -0.763038 |
| 6  | 4.635263  | -0.843520 | -1.604358 |
| 1  | 4.613439  | -1.656932 | -2.331438 |
| 1  | 4.972652  | -1.240459 | -0.640447 |
| 1  | 5.346762  | -0.083842 | -1.944409 |
| 8  | -1.529512 | -2.554877 | -1.452637 |
| 1  | -0.642844 | -2.178108 | -1.606027 |
| 6  | -1.399773 | -3.767394 | -0.713705 |
| 1  | -2.401907 | -4.065649 | -0.400038 |
| 1  | -0.774997 | -3.628185 | 0.175118  |
| 1  | -0.971141 | -4.558265 | -1.336293 |
| 8  | 3.082918  | 1.475026  | 0.471604  |
| 1  | 2.417085  | 1.284240  | 1.168123  |
| 6  | 2.742800  | 2.729902  | -0.119883 |

|   |          |          |           |
|---|----------|----------|-----------|
| 1 | 3.380056 | 2.862300 | -0.997177 |
| 1 | 2.935577 | 3.550223 | 0.579924  |
| 1 | 1.690739 | 2.752328 | -0.428028 |

-----
